# Supplementary material
Source: publisher site journal article supplement (https://static.cambridge.org/content/id/urn:cambridge.org:id:article:S1323358023000449/resource/name/S1323358023000449supp001.pdf)
Supplement: Supplementary file 1 [file S1323358023000449supp001.pdf]

## Supplementary Materials

### *Averaged Spectra*

The average line profiles for the  $^{12}\text{CO}$ ,  $^{13}\text{CO}$ , from our survey, together with  $^{12}\text{CO}$  from the Columbia CO Survey (Dame, Hartmann, and Thaddeus 2001) averaged over each two square degrees,  $1^\circ \times 2^\circ$  ( $l \times b$ ), are displayed in Figures 12-32.

### *Integrated Intensity Maps*

Figures 33 to 184 are the integrated intensity maps (moment  $0^{\text{th}}$ ) of  $T_{MB}$  from our survey. Each moment map covers a region 10 degrees by 2 degrees, and is integrated over a 10 km/s velocity range.

### *RMS Noise Maps*

Figures 185 to 189 show the  $1 \sigma$  noise maps of  $^{12}\text{CO}$ ,  $^{13}\text{CO}$  and  $\text{C}^{18}\text{O}$  data. The maps have been produced by integrating 2000 emission free channels.

### *System Temperature*

Maps of the system temperature for each isotopologue line are shown in Figures 190-194. Striping in these images occurs because the data is scanned in the  $l$  and  $b$  directions arising from sky variations during the scan.

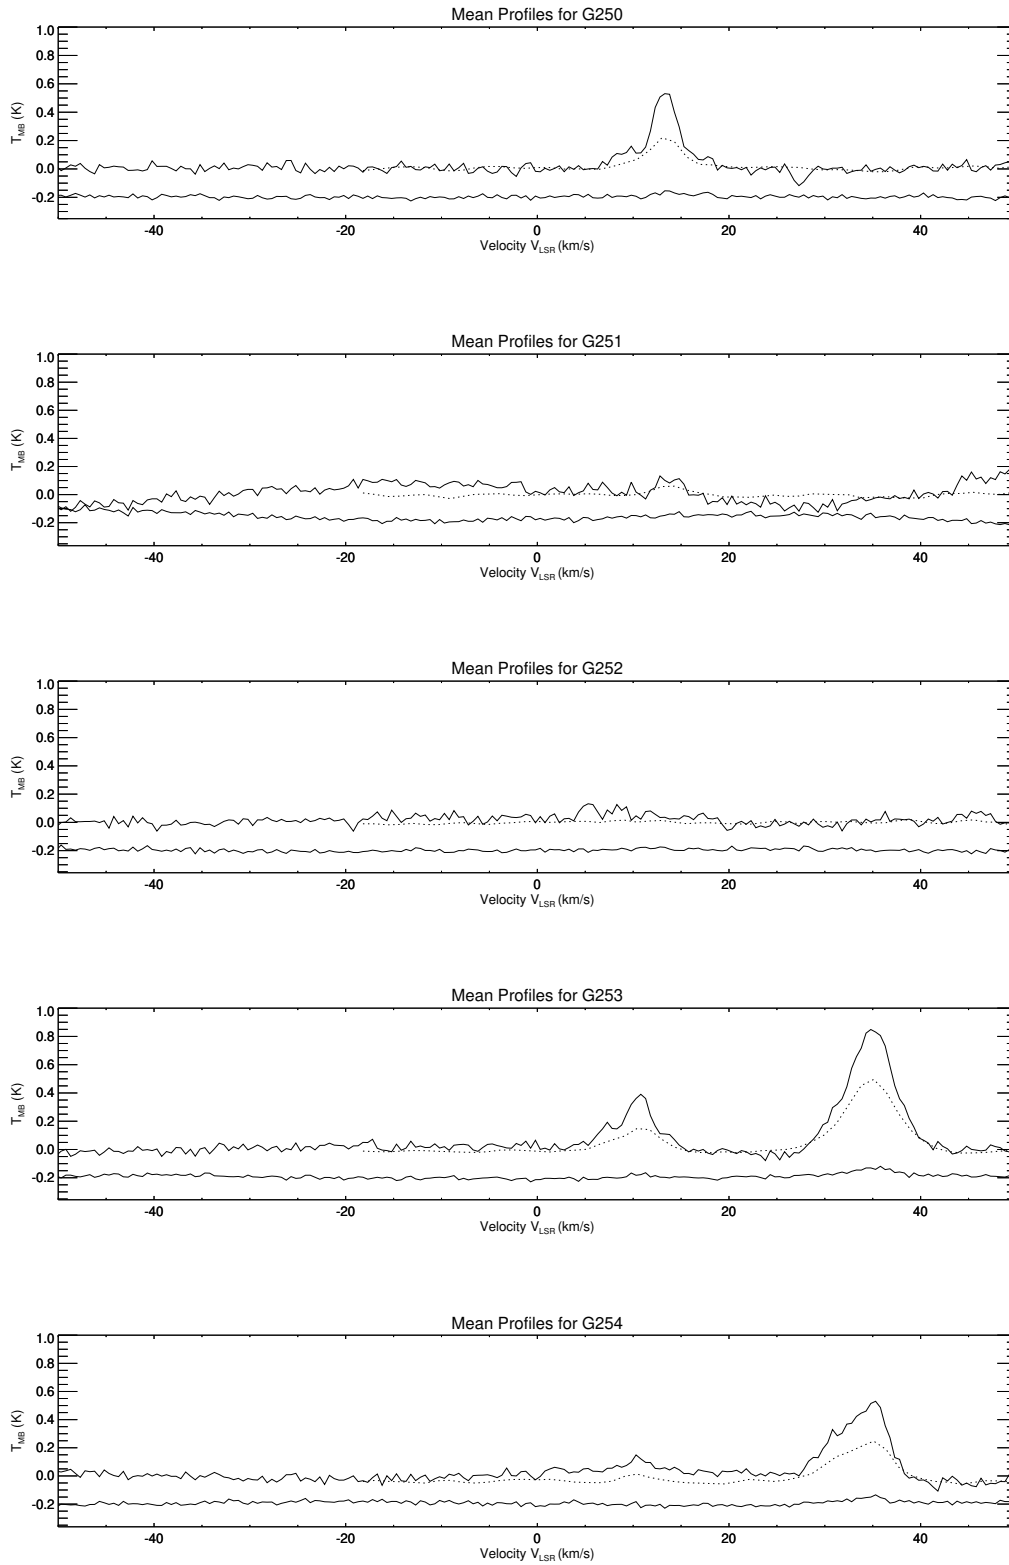

**Figure 12.** Average spectra for each  $1^\circ \times 2^\circ$  along the Galactic Plane between  $l = 250$ - $255^\circ$ , labelled by their lower longitude limit, from  $-150 < V_{LSR} < +50$   $\text{km s}^{-1}$ . The dark solid lines are the Mopra  $^{12}\text{CO}$  data, while the lower black lines are the  $^{13}\text{CO}$  emission offset by  $-0.2\text{K}$ . The dashed lines are the equivalent average  $^{12}\text{CO}$  spectra from the Columbia CO Survey (Dame *et al.*, 2001)

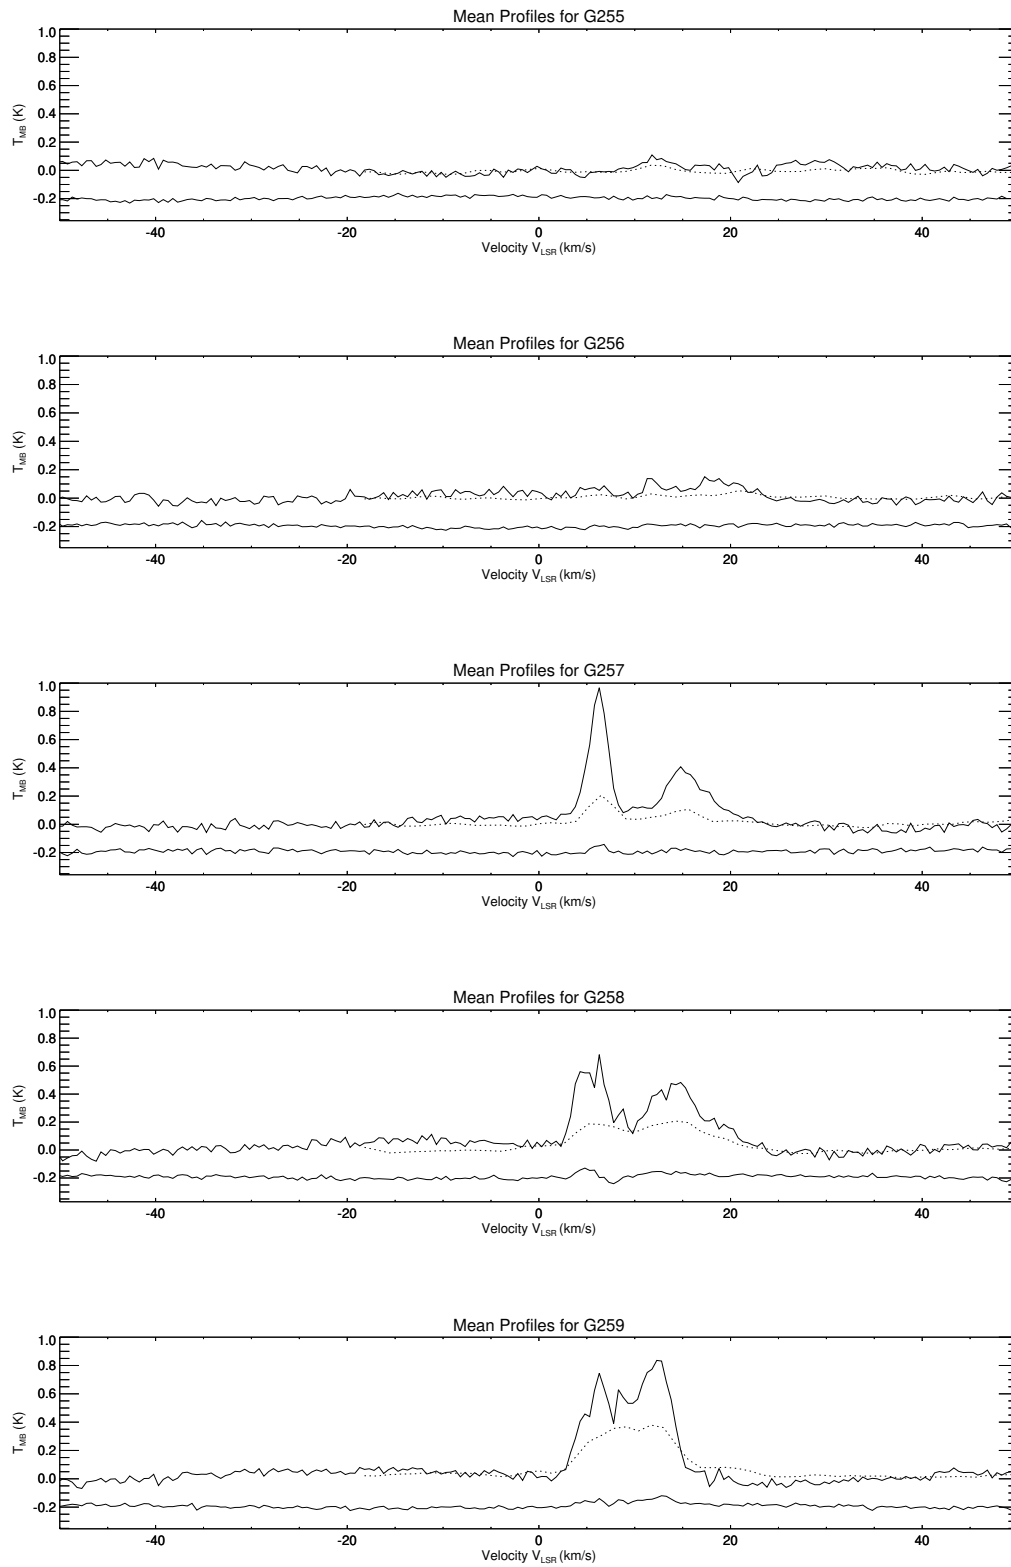

**Figure 13.** Average spectra for each  $1^\circ \times 2^\circ$  along the Galactic Plane between  $l = 255 - 260^\circ$ , labelled by their lower longitude limit, from  $-150 < V_{LSR} < +50 \text{ km s}^{-1}$ . The dark solid lines are the Mopra  $^{12}\text{CO}$  data, while the lower black lines are the  $^{13}\text{CO}$  emission offset by  $-0.2\text{K}$ . The dashed lines are the equivalent average  $^{12}\text{CO}$  spectra from the Columbia CO Survey (Dame et al., 2001)

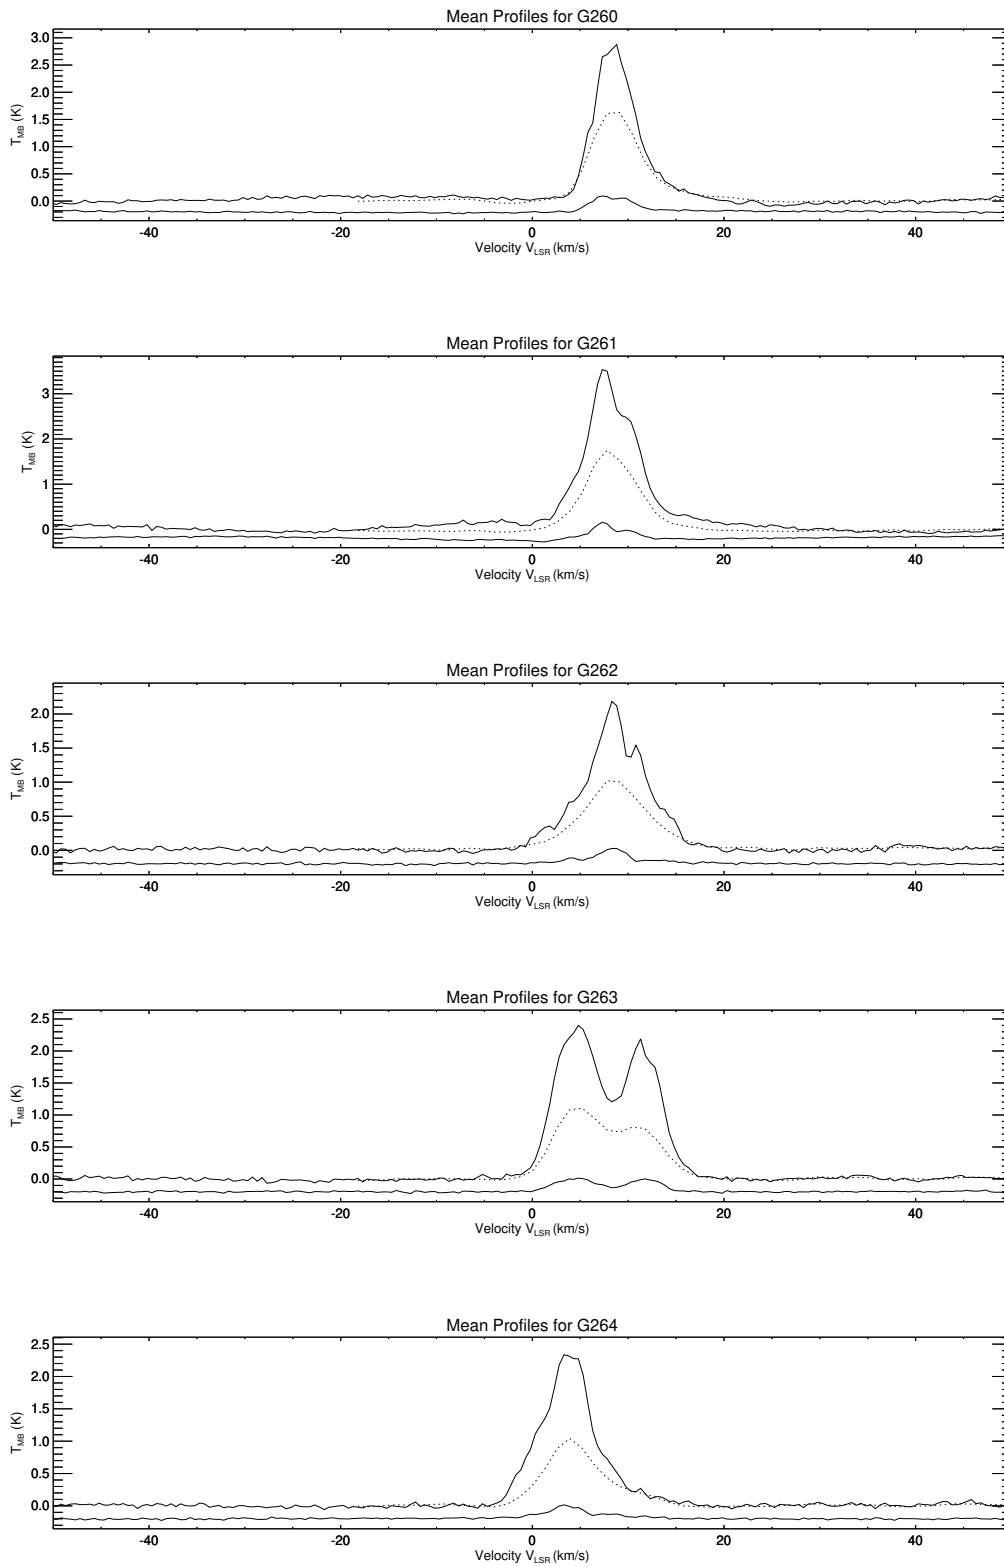

**Figure 14.** Average spectra for each  $1^\circ \times 2^\circ$  along the Galactic Plane between  $l = 260 - 265^\circ$ , labelled by their lower longitude limit, from  $-150 < V_{LSR} < +50 \text{ km s}^{-1}$ . The dark solid lines are the Mopra  $^{12}\text{CO}$  data, while the lower black lines are the  $^{13}\text{CO}$  emission offset by  $-0.2\text{K}$ . The dashed lines are the equivalent average  $^{12}\text{CO}$  spectra from the Columbia CO Survey (Dame *et al.*, 2001)

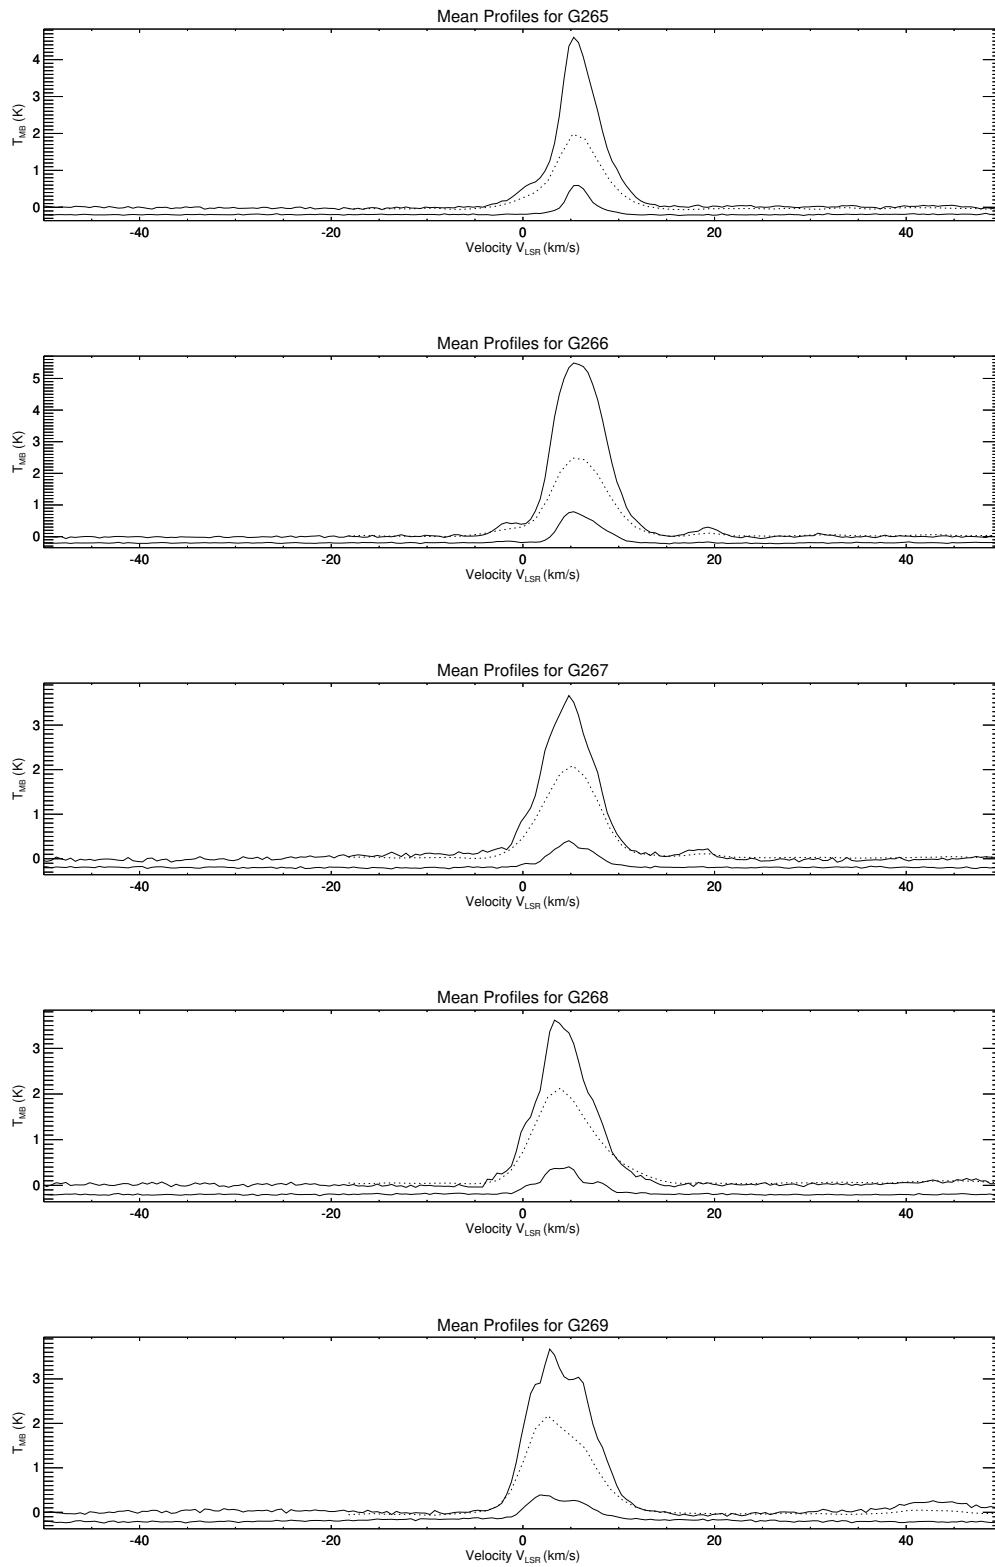

**Figure 15.** Average spectra for each  $1^\circ \times 2^\circ$  along the Galactic Plane between  $l = 265 - 270^\circ$ , labelled by their lower longitude limit, from  $-150 < V_{LSR} < +50\text{ km s}^{-1}$ . The dark solid lines are the Mopra  $^{12}\text{CO}$  data, while the lower black lines are the  $^{13}\text{CO}$  emission offset by  $-0.2\text{K}$ . The dashed lines are the equivalent average  $^{12}\text{CO}$  spectra from the Columbia CO Survey (Dame et al., 2001)

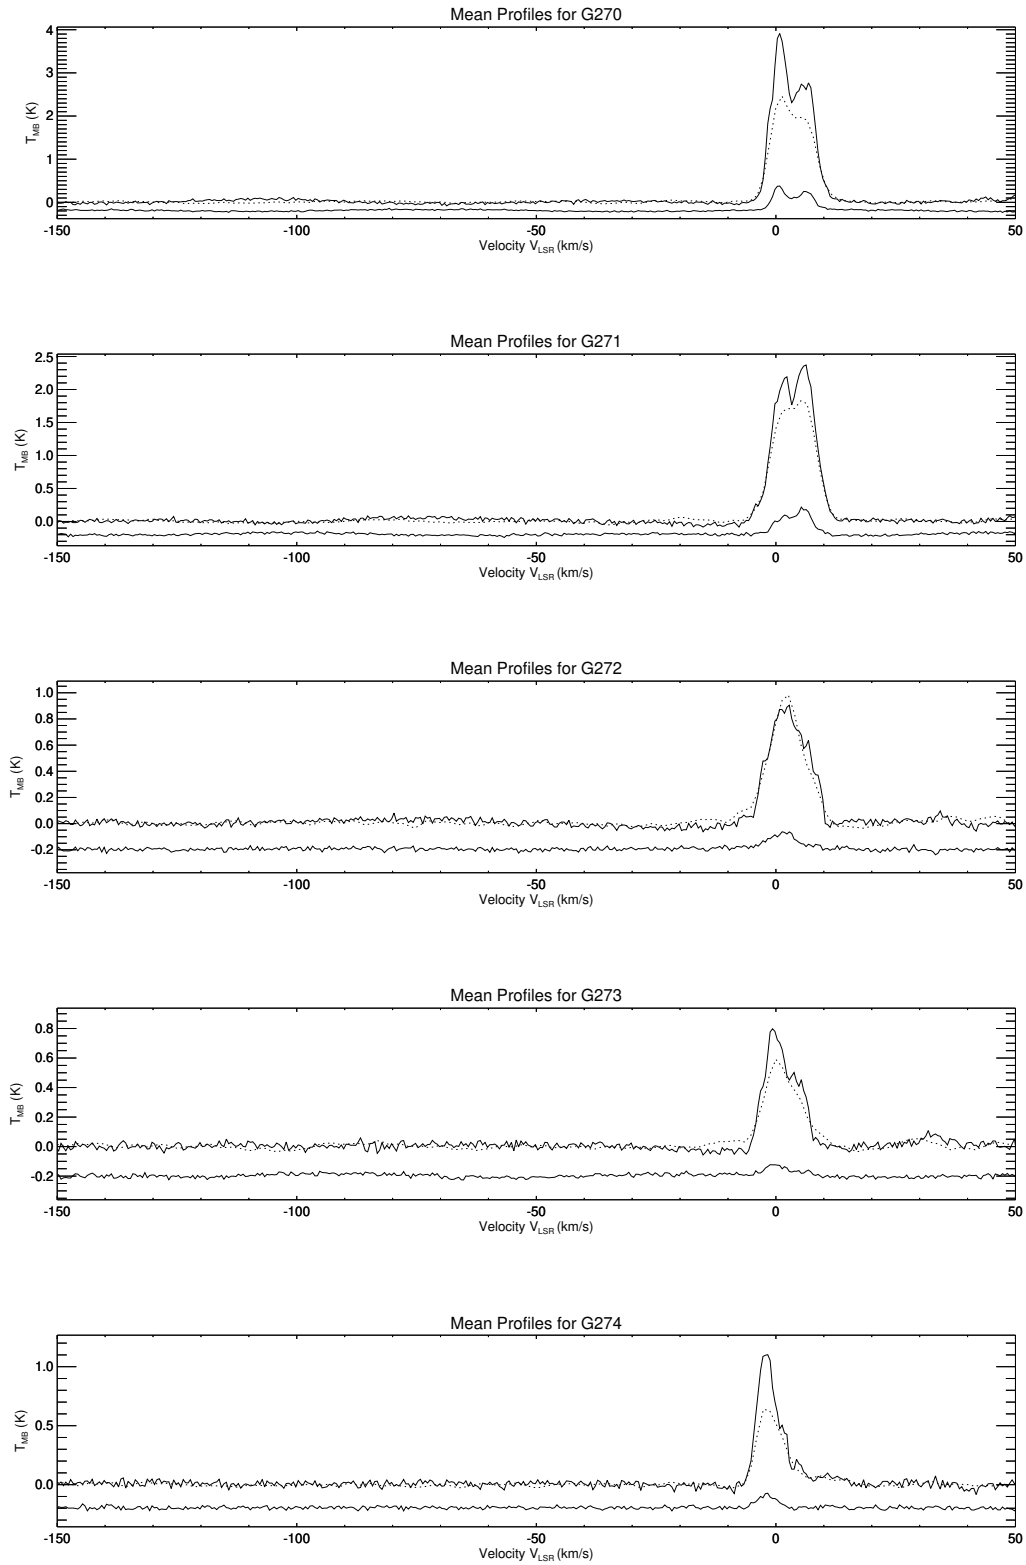

**Figure 16.** Average spectra for each  $1^\circ \times 2^\circ$  along the Galactic Plane between  $l = 270 - 275^\circ$ , labelled by their lower longitude limit, from  $-150 < V_{LSR} < +50\text{ km s}^{-1}$ . The dark solid lines are the Mopra  $^{12}\text{CO}$  data, while the lower black lines are the  $^{13}\text{CO}$  emission offset by  $-0.2\text{K}$ . The dashed lines are the equivalent average  $^{12}\text{CO}$  spectra from the Columbia CO Survey (Dame *et al.*, 2001)

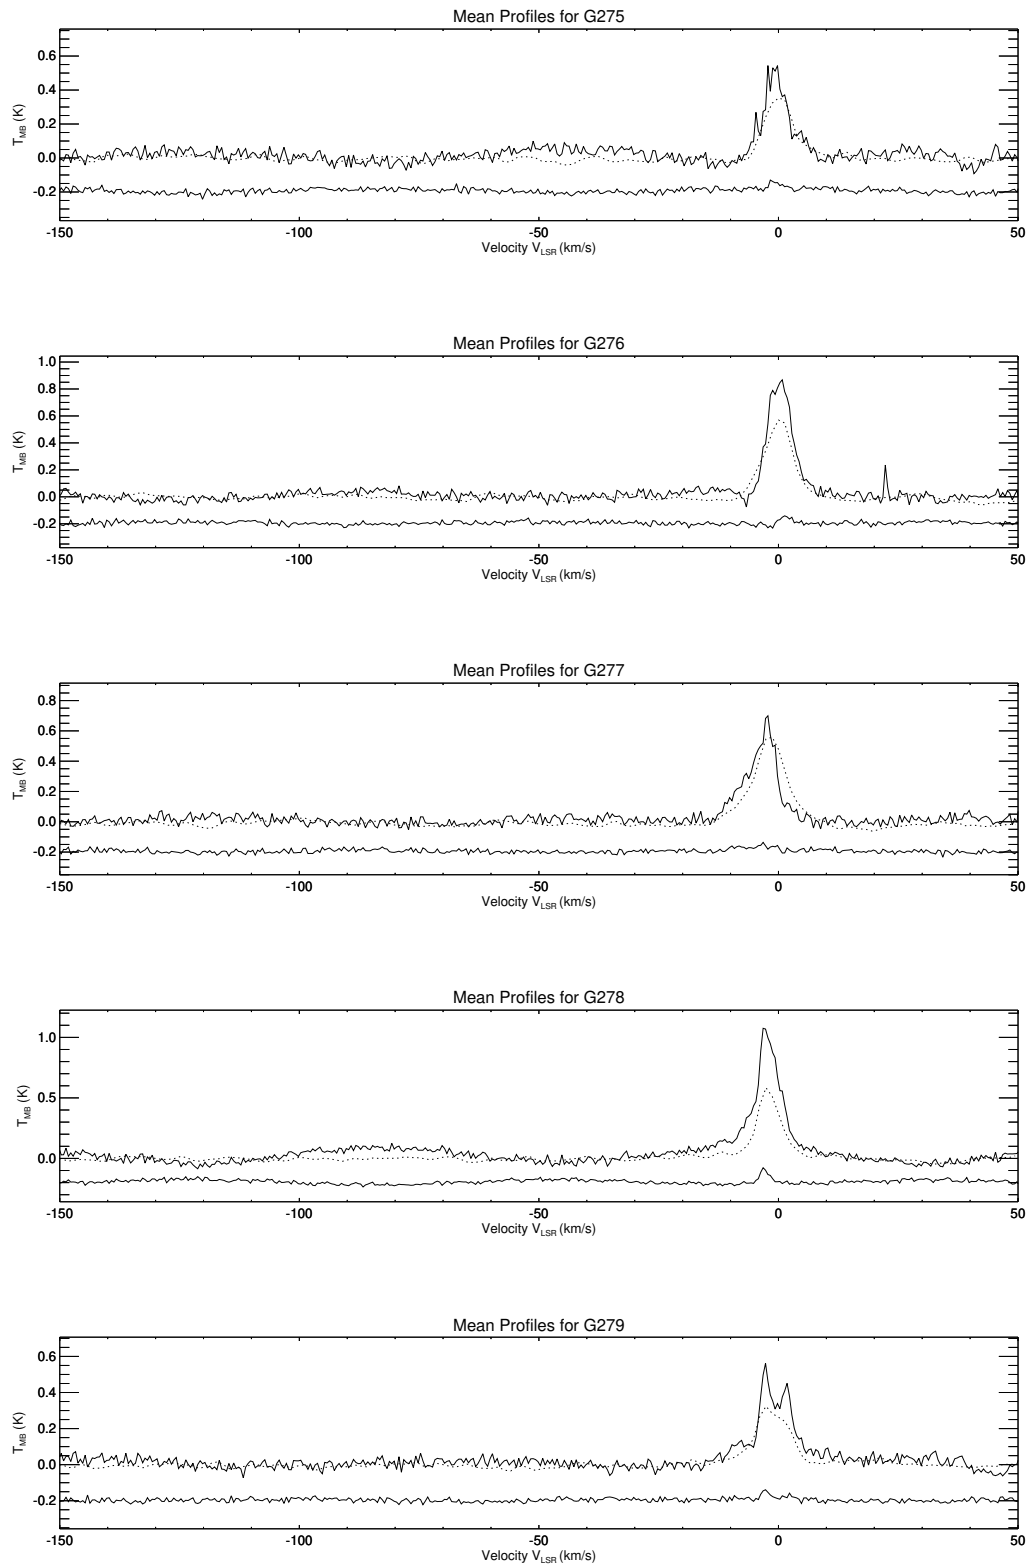

**Figure 17.** Average spectra for each  $1^\circ \times 2^\circ$  along the Galactic Plane between  $l = 275 - 280^\circ$ , labelled by their lower longitude limit, from  $-150 < V_{LSR} < +50\text{ km s}^{-1}$ . The dark solid lines are the Mopra  $^{12}\text{CO}$  data, while the lower black lines are the  $^{13}\text{CO}$  emission offset by  $-0.2\text{K}$ . The dashed lines are the equivalent average  $^{12}\text{CO}$  spectra from the Columbia CO Survey (Dame et al., 2001)

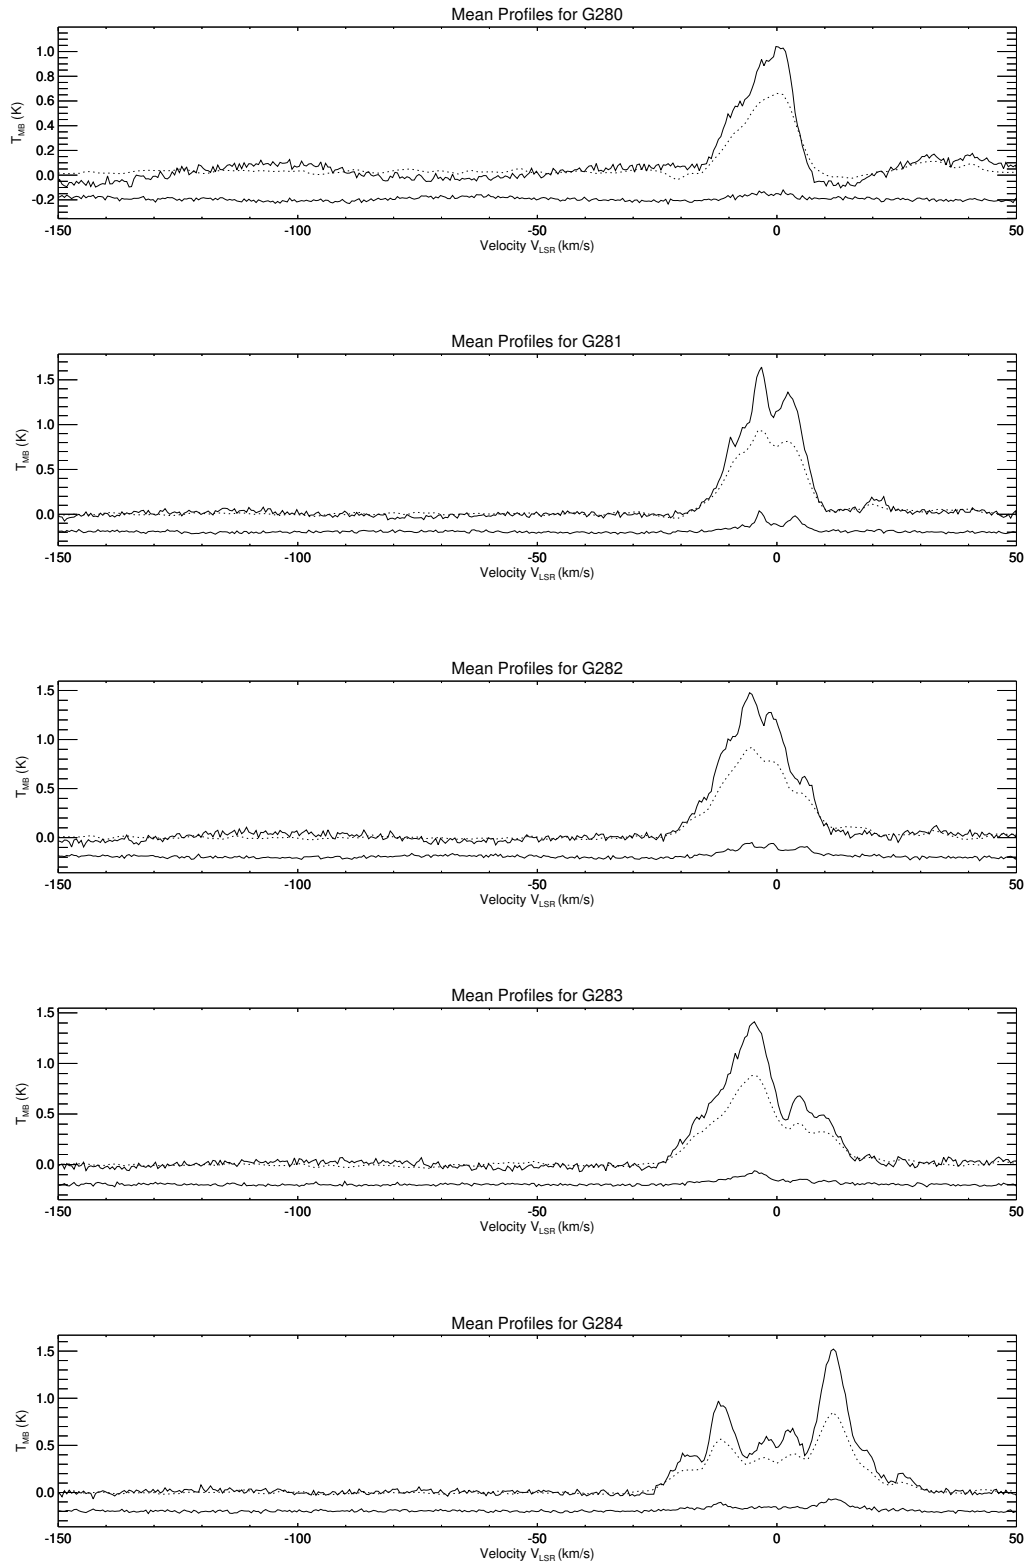

**Figure 18.** Average spectra for each  $1^\circ \times 2^\circ$  along the Galactic Plane between  $l = 280 - 285^\circ$ , labelled by their lower longitude limit, from  $-150 < V_{LSR} < +50 \text{ km s}^{-1}$ . The dark solid lines are the Mopra  $^{12}\text{CO}$  data, while the lower black lines are the  $^{13}\text{CO}$  emission offset by  $-0.2\text{K}$ . The dashed lines are the equivalent average  $^{12}\text{CO}$  spectra from the Columbia CO Survey (Dame *et al.*, 2001)



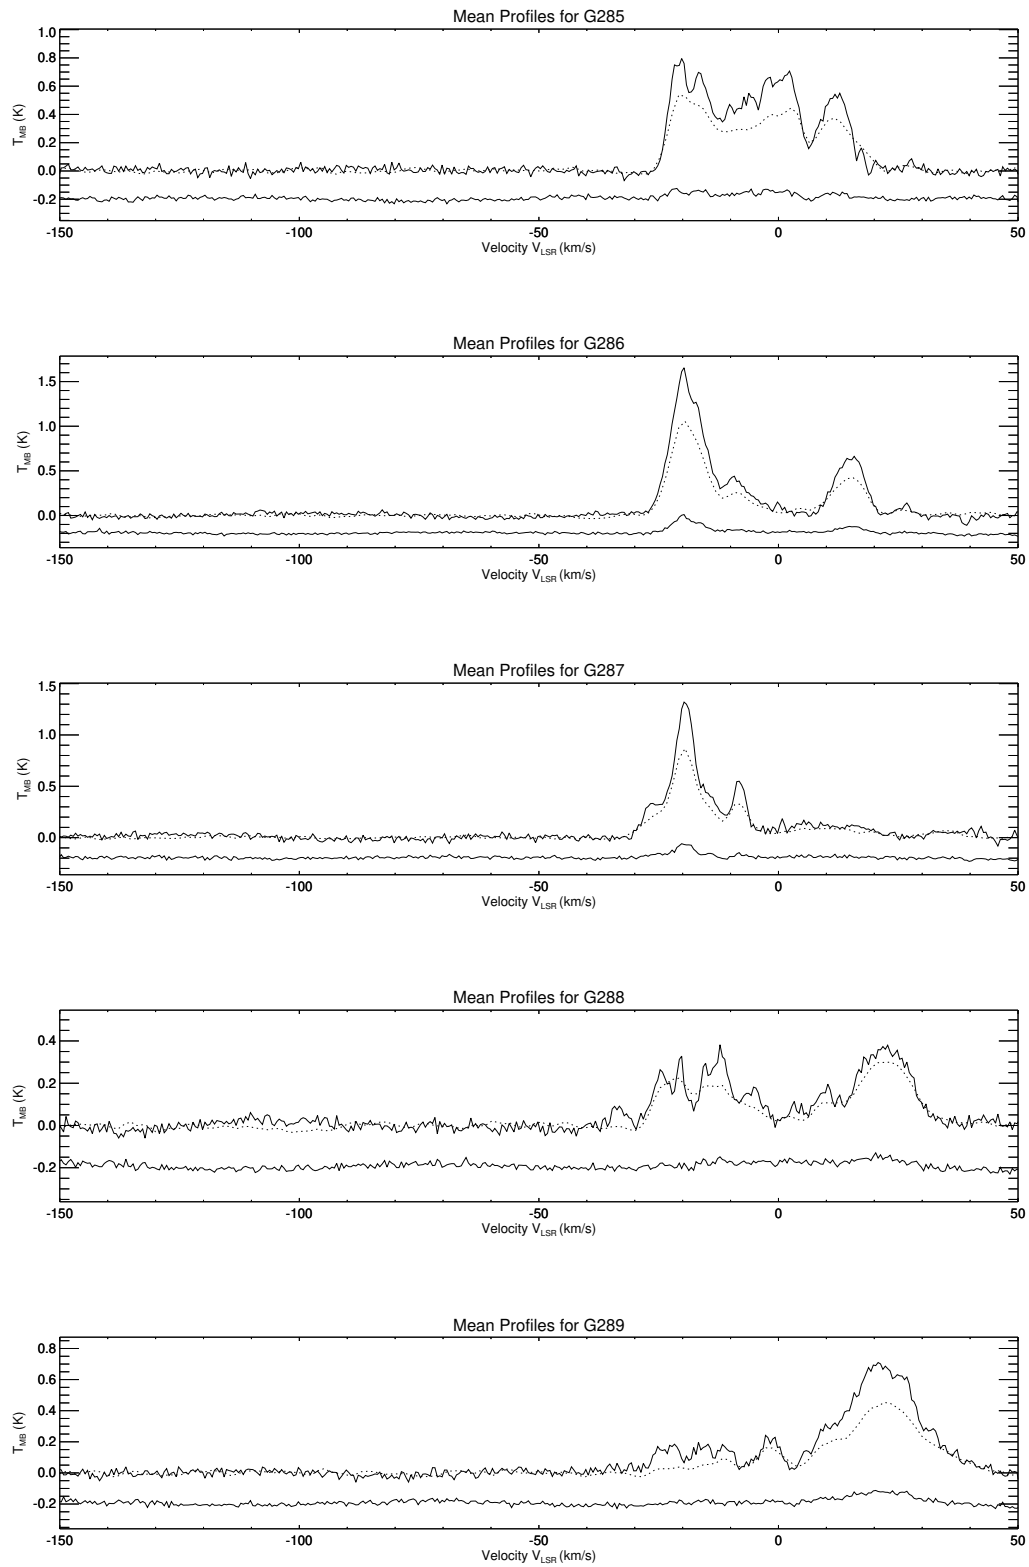

**Figure 19.** Average spectra for each  $1^\circ \times 2^\circ$  along the Galactic Plane between  $l = 285 - 290^\circ$ , labelled by their lower longitude limit, from  $-150 < V_{LSR} < +50 \text{ km s}^{-1}$ . The dark solid lines are the Mopra  $^{12}\text{CO}$  data, while the lower black lines are the  $^{13}\text{CO}$  emission offset by  $-0.2\text{K}$ . The dashed lines are the equivalent average  $^{12}\text{CO}$  spectra from the Columbia CO Survey (Dame et al., 2001)

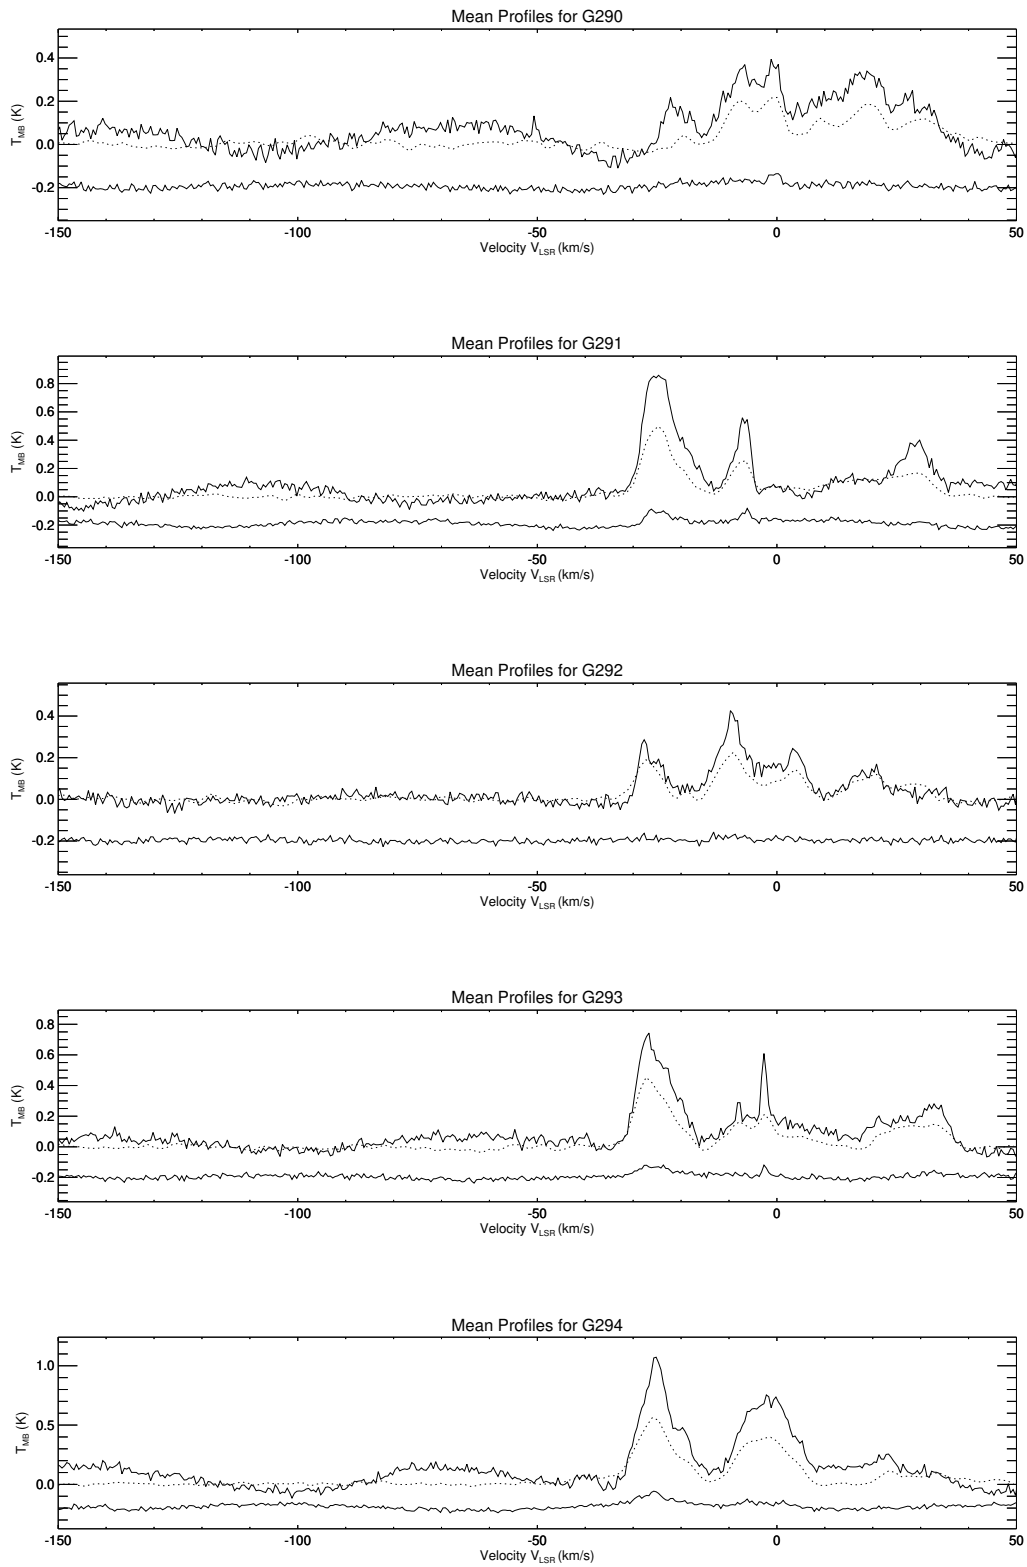

**Figure 20.** Average spectra for each  $1^\circ \times 2^\circ$  along the Galactic Plane between  $l = 290 - 295^\circ$ , labelled by their lower longitude limit, from  $-150 < V_{LSR} < +50 \text{ km s}^{-1}$ . The dark solid lines are the Mopra  $^{12}\text{CO}$  data, while the lower black lines are the  $^{13}\text{CO}$  emission offset by  $-0.2\text{K}$ . The dashed lines are the equivalent average  $^{12}\text{CO}$  spectra from the Columbia CO Survey (Dame et al., 2001)

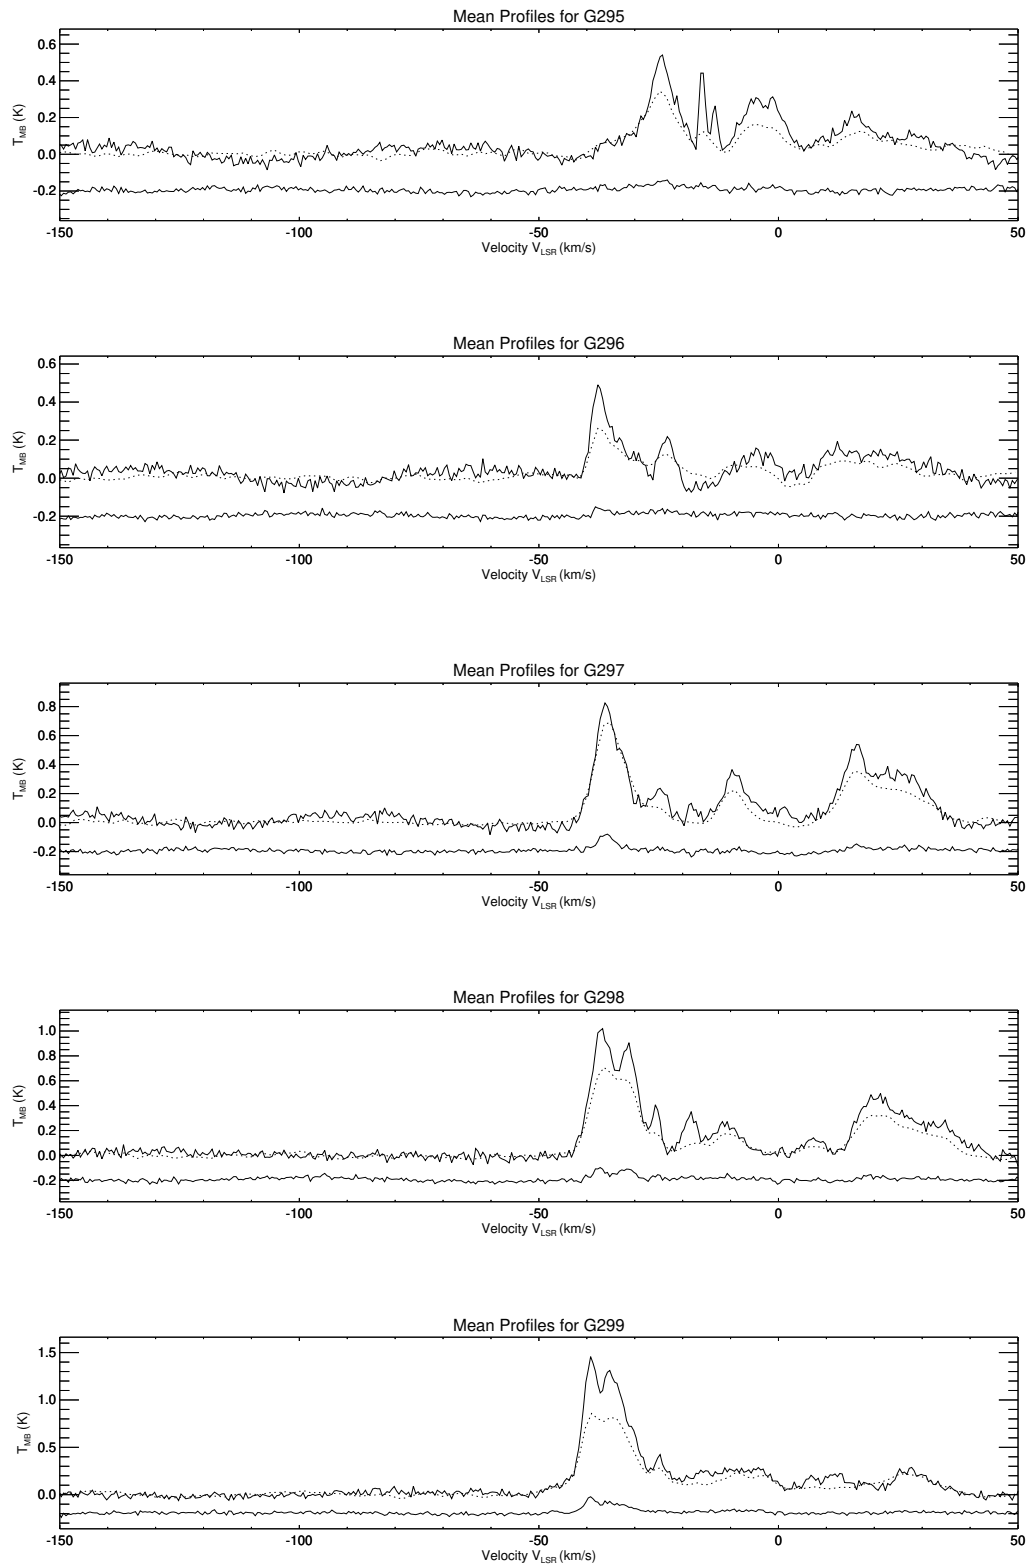

**Figure 21.** Average spectra for each  $1^\circ \times 2^\circ$  along the Galactic Plane between  $l = 295 - 300^\circ$ , labelled by their lower longitude limit, from  $-150 < V_{LSR} < +50\text{ km s}^{-1}$ . The dark solid lines are the Mopra  $^{12}\text{CO}$  data, while the lower black lines are the  $^{13}\text{CO}$  emission offset by  $-0.2\text{K}$ . The dashed lines are the equivalent average  $^{12}\text{CO}$  spectra from the Columbia CO Survey (Dame et al., 2001)

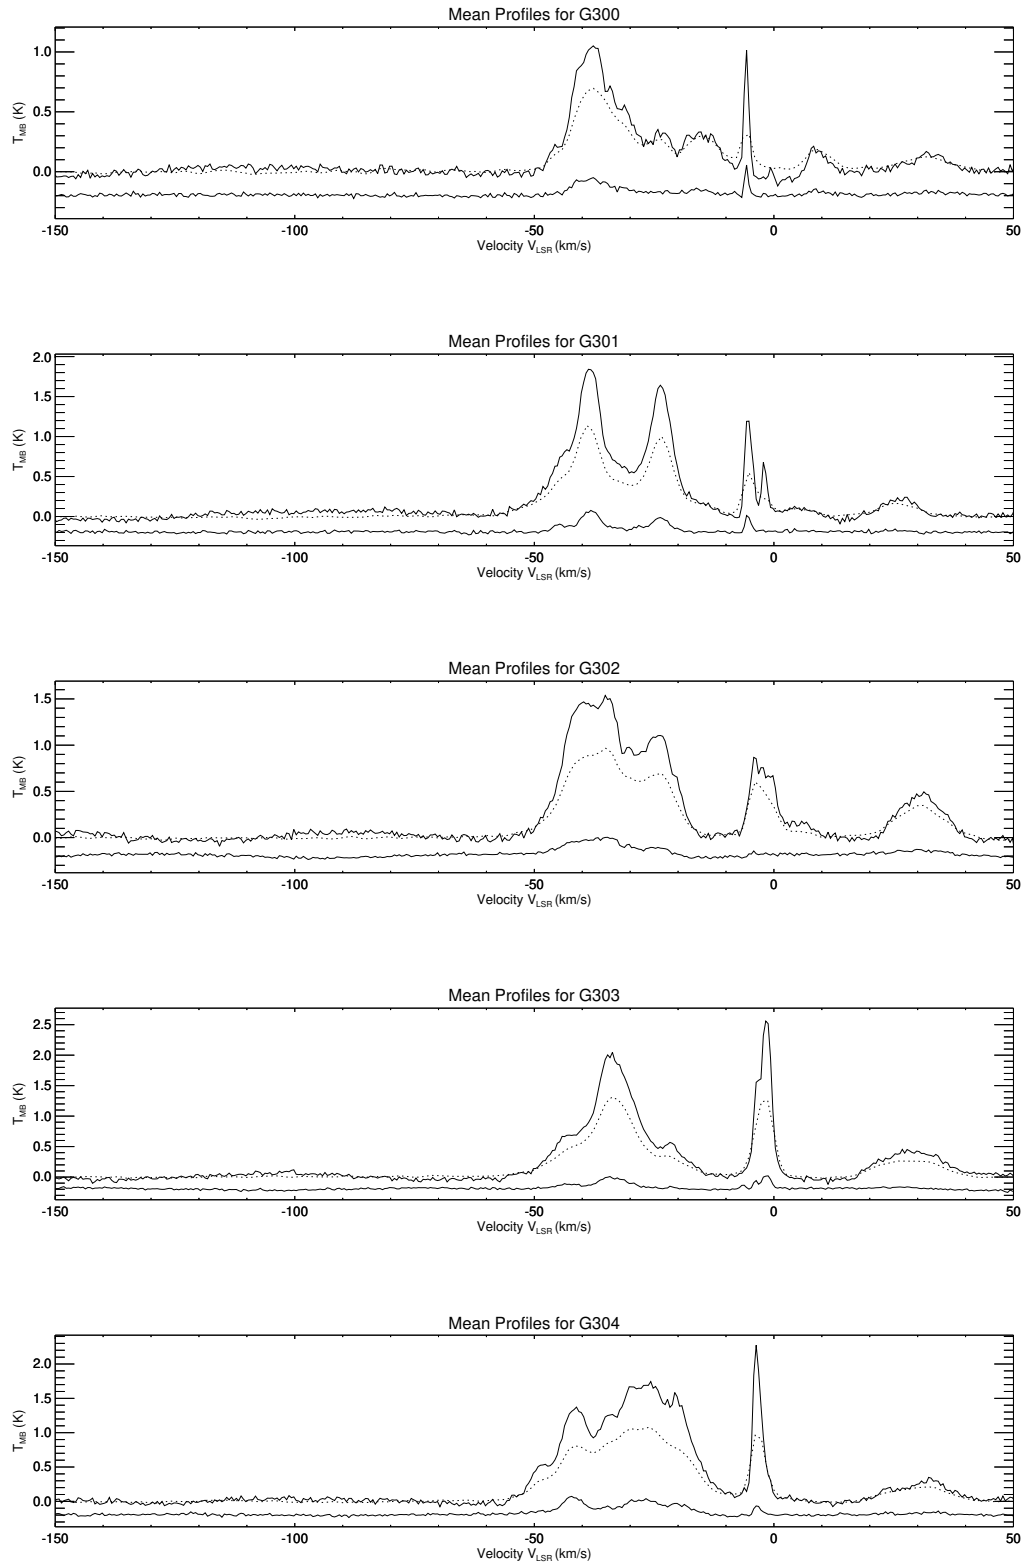

**Figure 22.** Average spectra for each  $1^\circ \times 2^\circ$  along the Galactic Plane between  $l = 300 - 305^\circ$ , labelled by their lower longitude limit, from  $-150 < V_{LSR} < +50 \text{ km s}^{-1}$ . The dark solid lines are the Mopra  $^{12}\text{CO}$  data, while the lower black lines are the  $^{13}\text{CO}$  emission offset by  $-0.2\text{K}$ . The dashed lines are the equivalent average  $^{12}\text{CO}$  spectra from the Columbia CO Survey (Dame *et al.*, 2001)

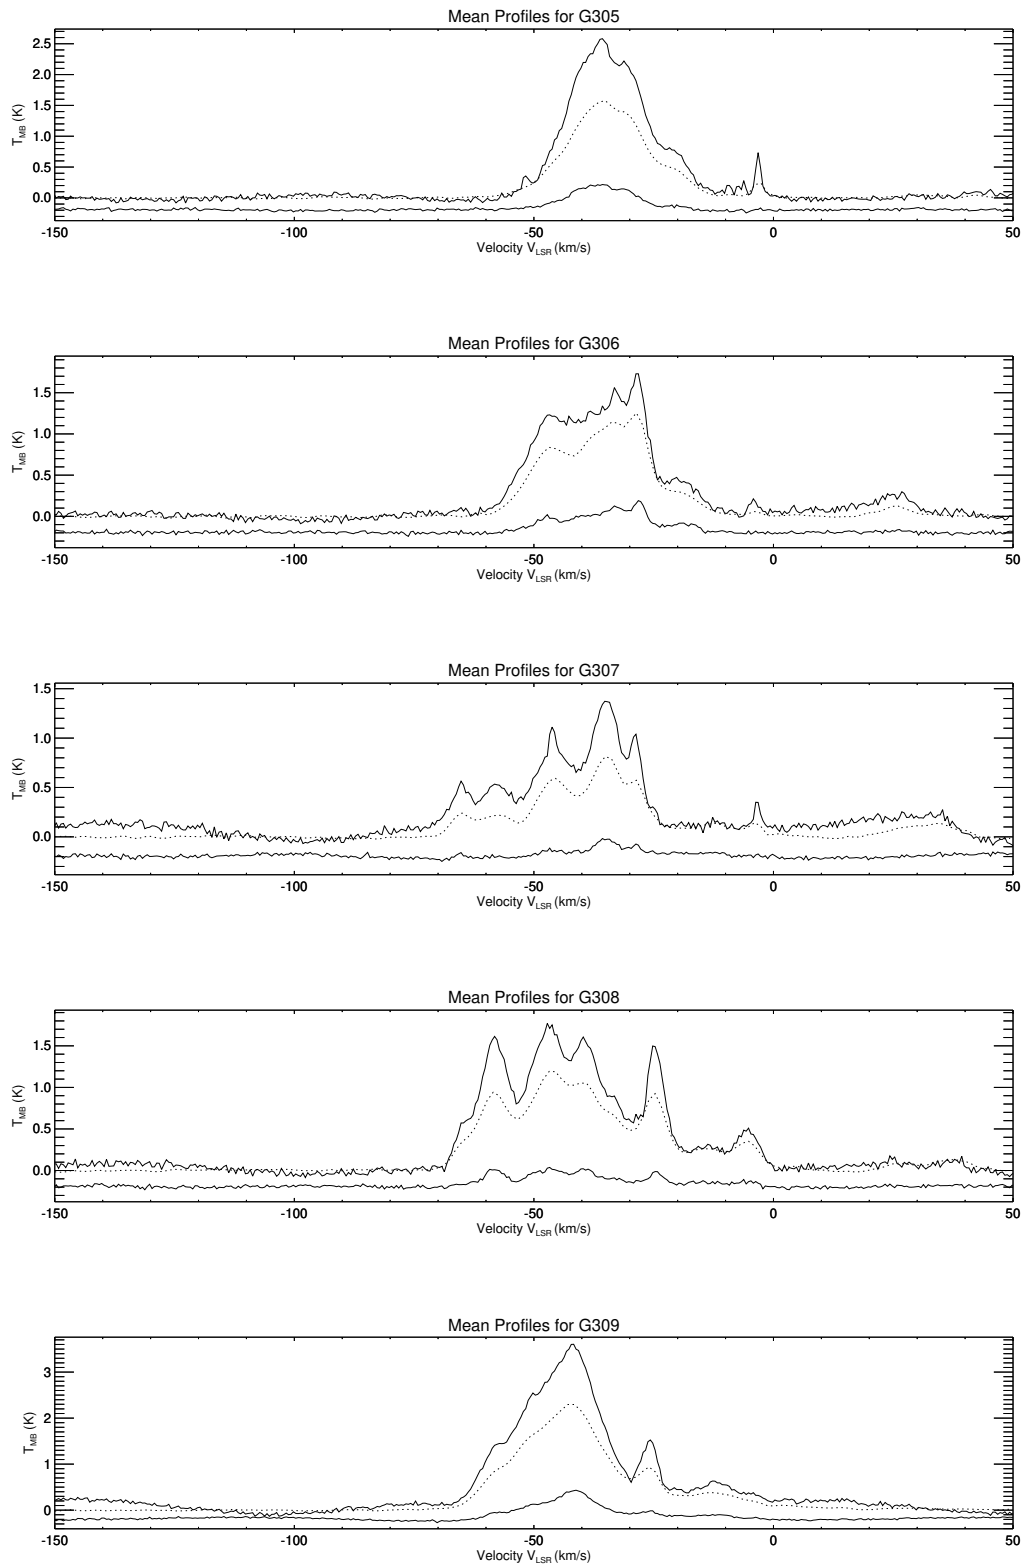

**Figure 23.** Average spectra for each  $1^\circ \times 2^\circ$  along the Galactic Plane between  $l = 305 - 310^\circ$ , labelled by their lower longitude limit, from  $-150 < V_{LSR} < +50 \text{ km s}^{-1}$ . The dark solid lines are the Mopra  $^{12}\text{CO}$  data, while the lower black lines are the  $^{13}\text{CO}$  emission offset by  $-0.2\text{K}$ . The dashed lines are the equivalent average  $^{12}\text{CO}$  spectra from the Columbia CO Survey (Dame et al., 2001)

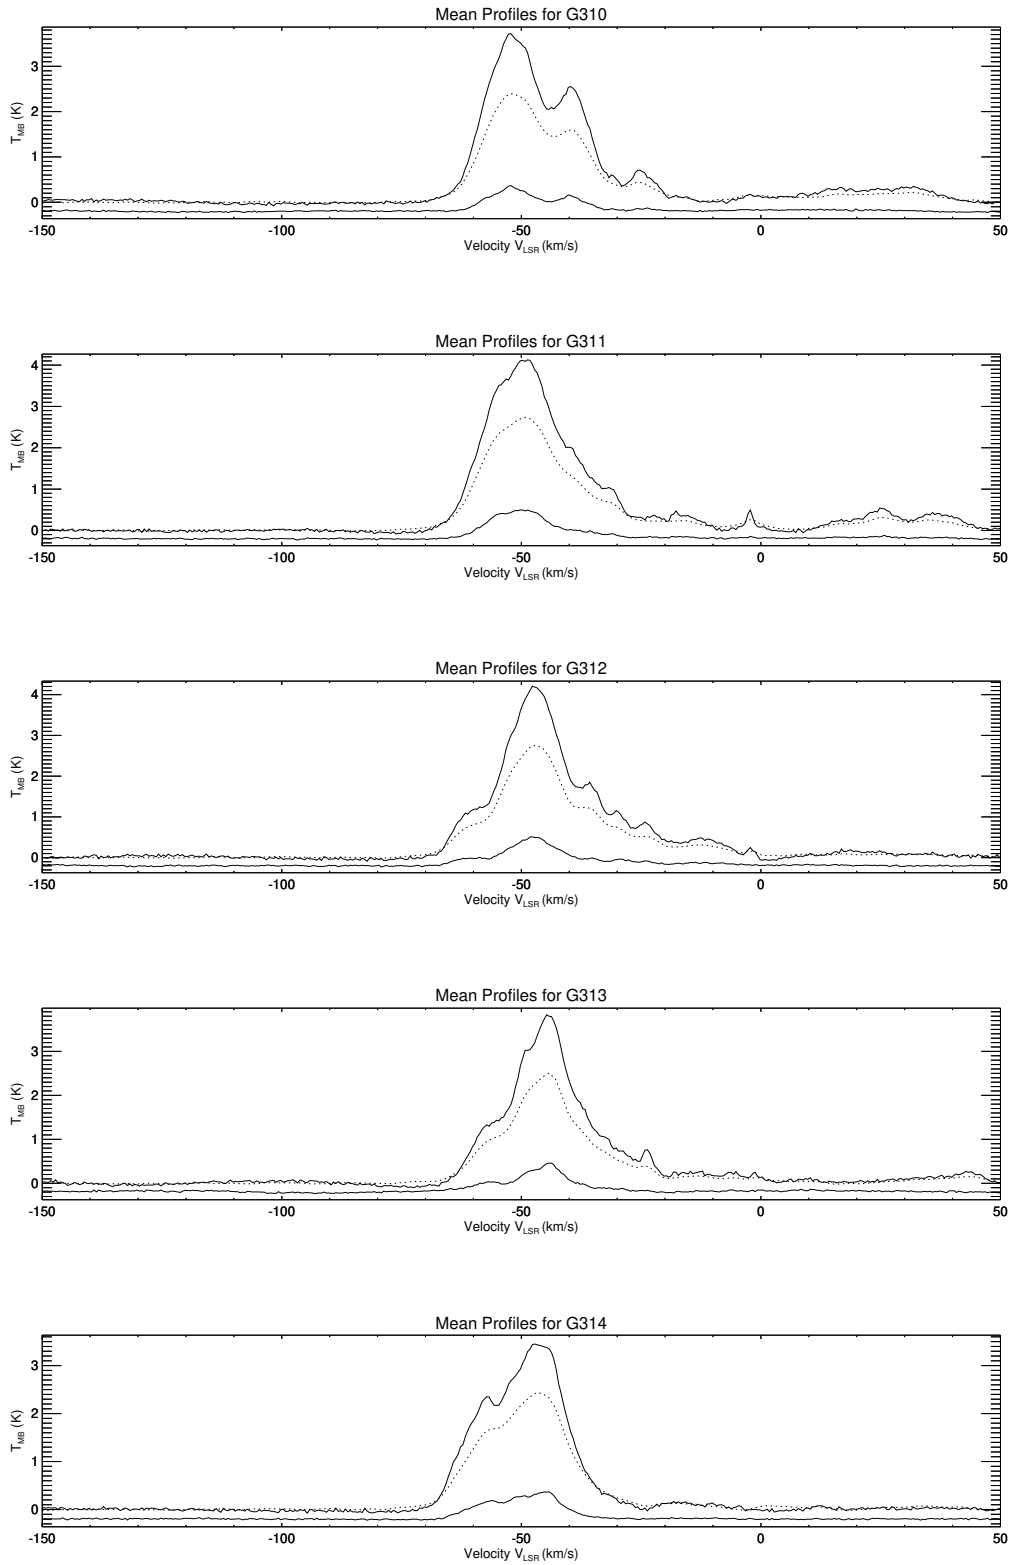

**Figure 24.** Average spectra for each  $1^\circ \times 2^\circ$  along the Galactic Plane between  $l = 310 - 315^\circ$ , labelled by their lower longitude limit, from  $-150 < V_{LSR} < +50\text{ km s}^{-1}$ . The dark solid lines are the Mopra  $^{12}\text{CO}$  data, while the lower black lines are the  $^{13}\text{CO}$  emission offset by  $-0.2\text{K}$ . The dashed lines are the equivalent average  $^{12}\text{CO}$  spectra from the Columbia CO Survey (Dame et al., 2001)

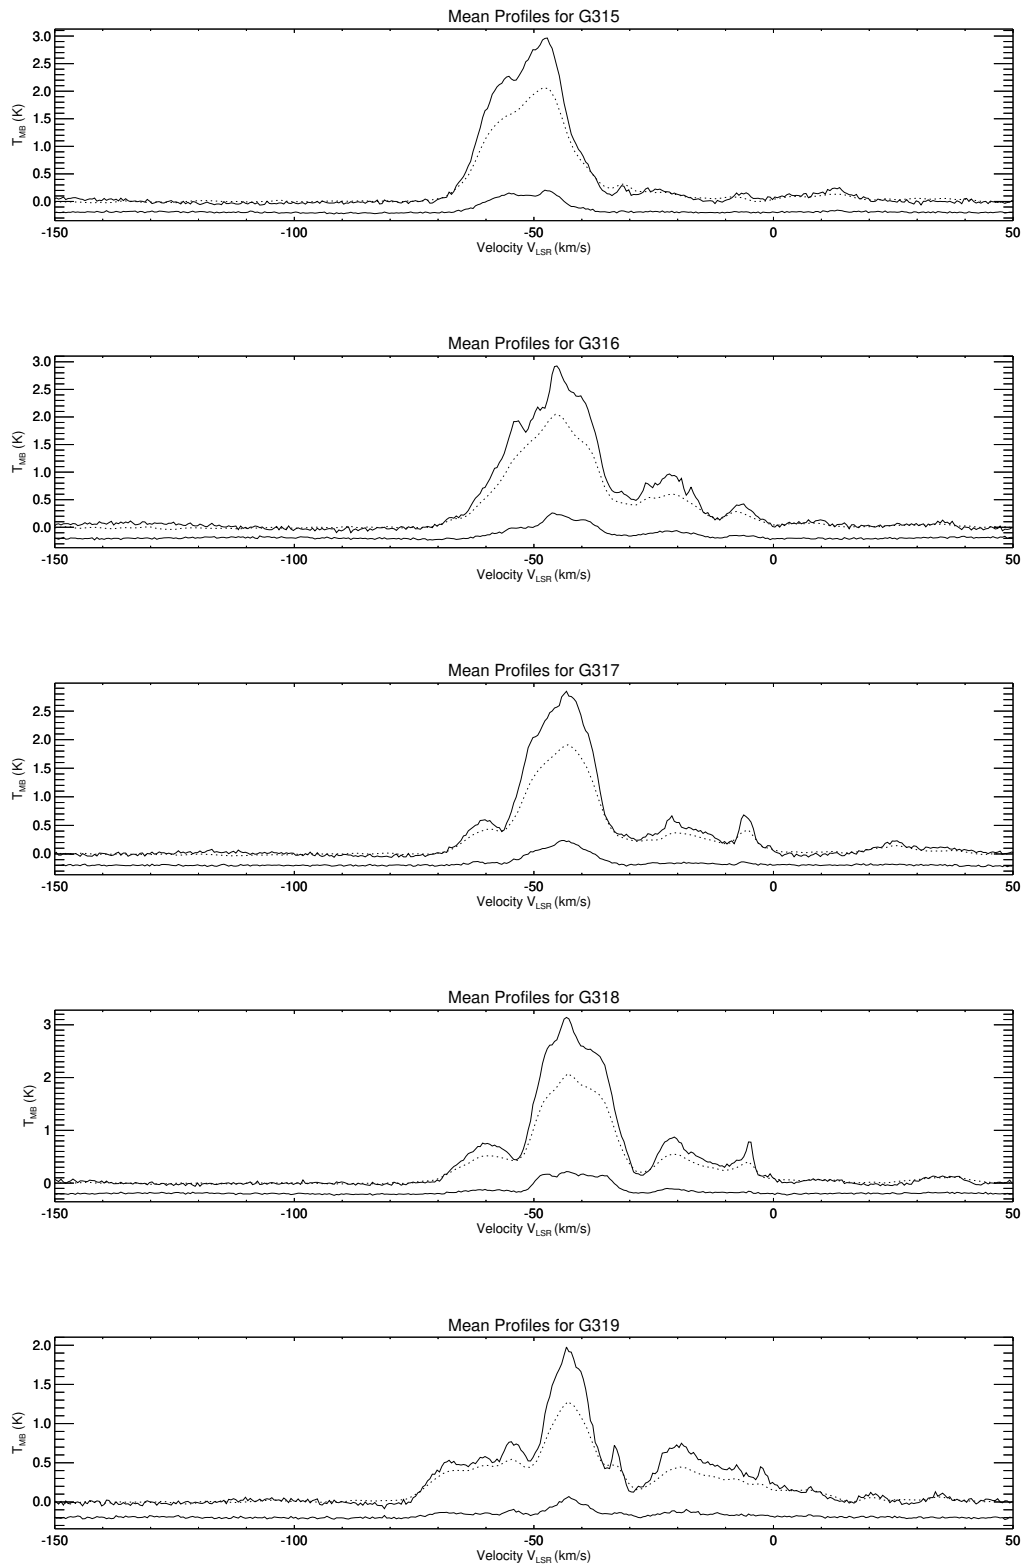

**Figure 25.** Average spectra for each  $1^\circ \times 2^\circ$  along the Galactic Plane between  $l = 315 - 320^\circ$ , labelled by their lower longitude limit, from  $-150 < V_{LSR} < +50\text{ km s}^{-1}$ . The dark solid lines are the Mopra  $^{12}\text{CO}$  data, while the lower black lines are the  $^{13}\text{CO}$  emission offset by  $-0.2\text{K}$ . The dashed lines are the equivalent average  $^{12}\text{CO}$  spectra from the Columbia CO Survey (Dame et al., 2001)

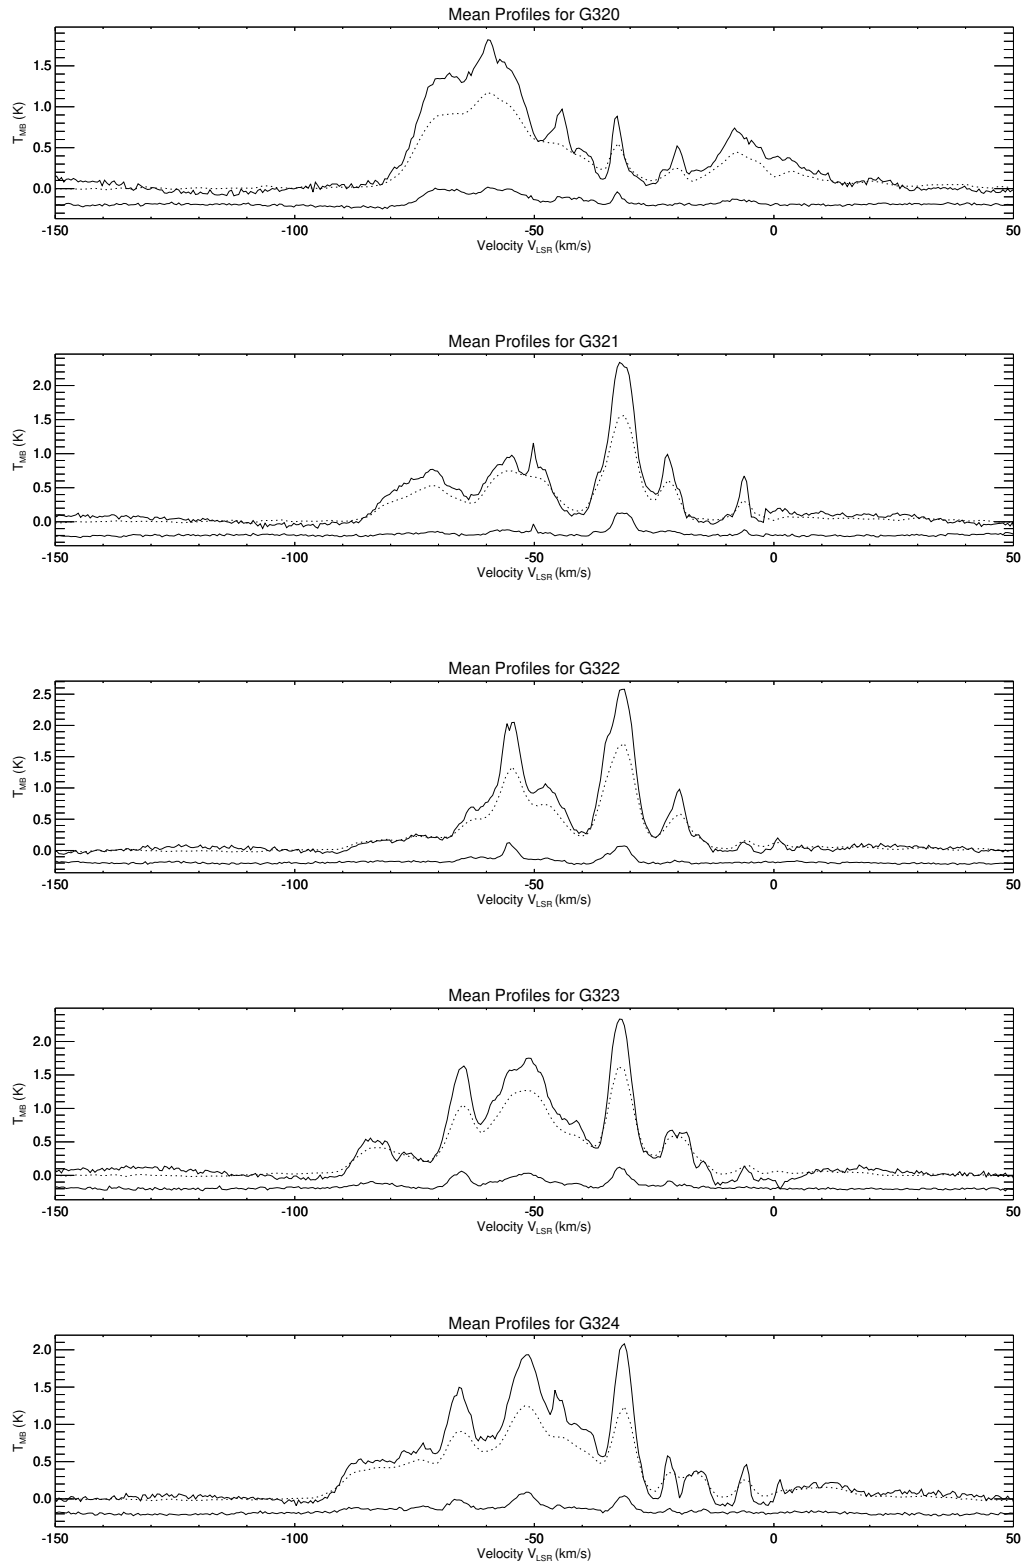

**Figure 26.** Average spectra for each  $1^\circ \times 2^\circ$  along the Galactic Plane between  $l = 320 - 325^\circ$ , labelled by their lower longitude limit, from  $-150 < V_{LSR} < +50 \text{ km s}^{-1}$ . The dark solid lines are the Mopra  $^{12}\text{CO}$  data, while the lower black lines are the  $^{13}\text{CO}$  emission offset by  $-0.2\text{K}$ . The dashed lines are the equivalent average  $^{12}\text{CO}$  spectra from the Columbia CO Survey (Dame *et al.*, 2001)



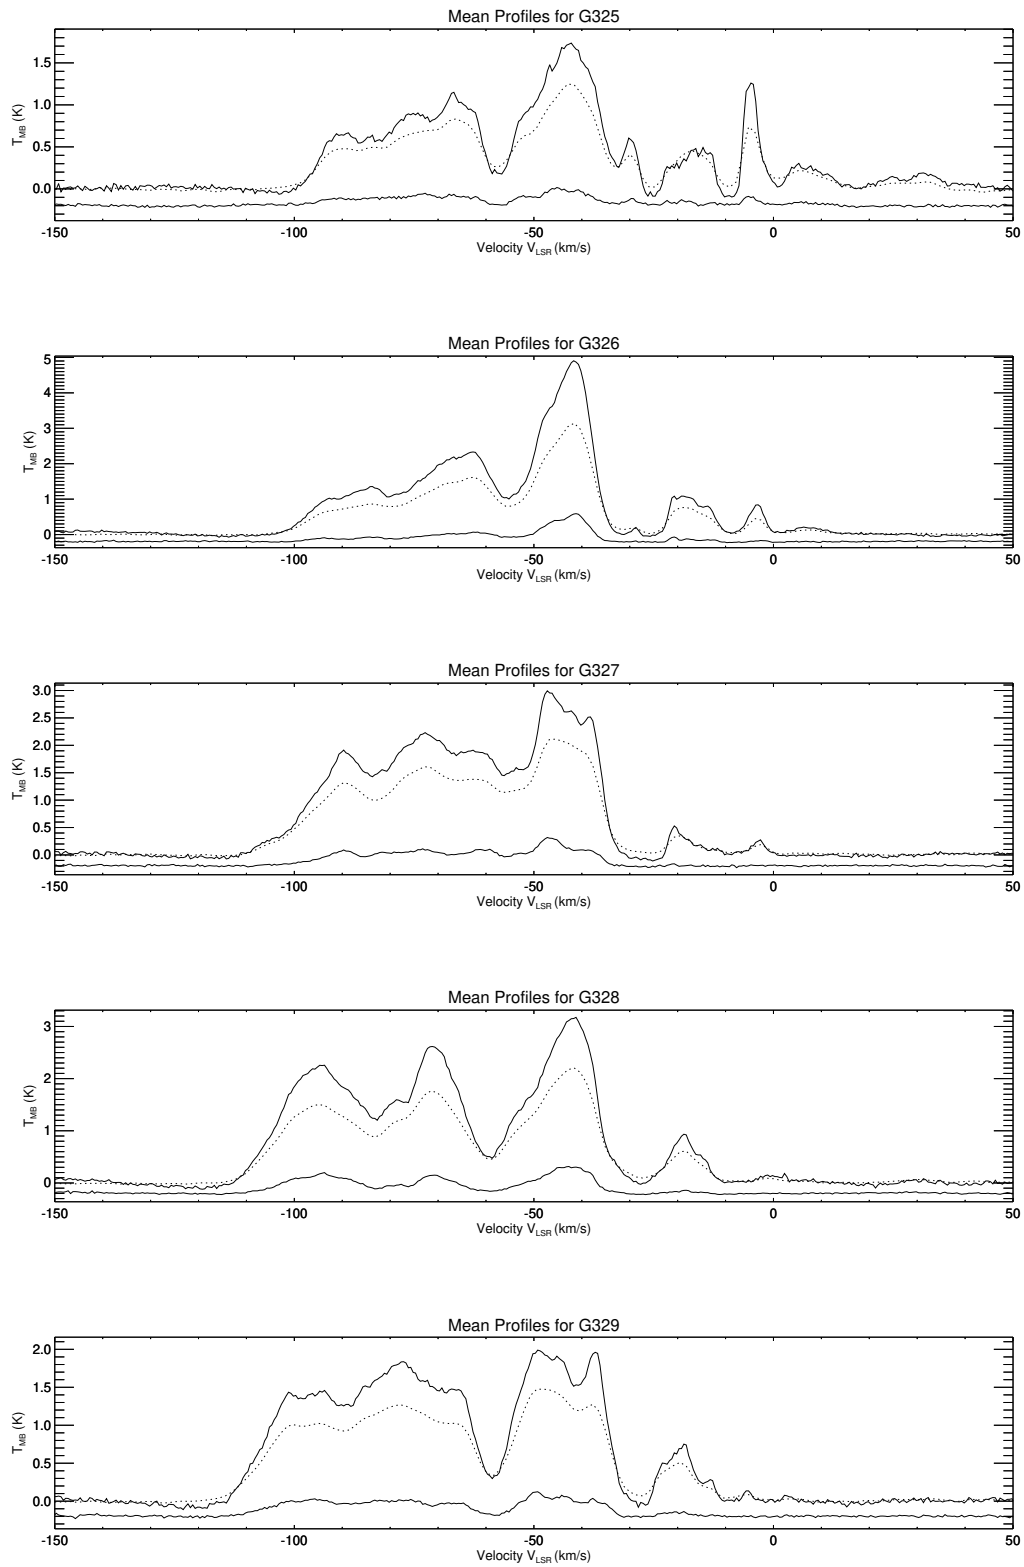

**Figure 27.** Average spectra for each  $1^\circ \times 2^\circ$  along the Galactic Plane between  $l = 325 - 330^\circ$ , labelled by their lower longitude limit, from  $-150 < V_{LSR} < +50\text{ km s}^{-1}$ . The dark solid lines are the Mopra  $^{12}\text{CO}$  data, while the lower black lines are the  $^{13}\text{CO}$  emission offset by  $-0.2\text{K}$ . The dashed lines are the equivalent average  $^{12}\text{CO}$  spectra from the Columbia CO Survey (Dame et al., 2001)

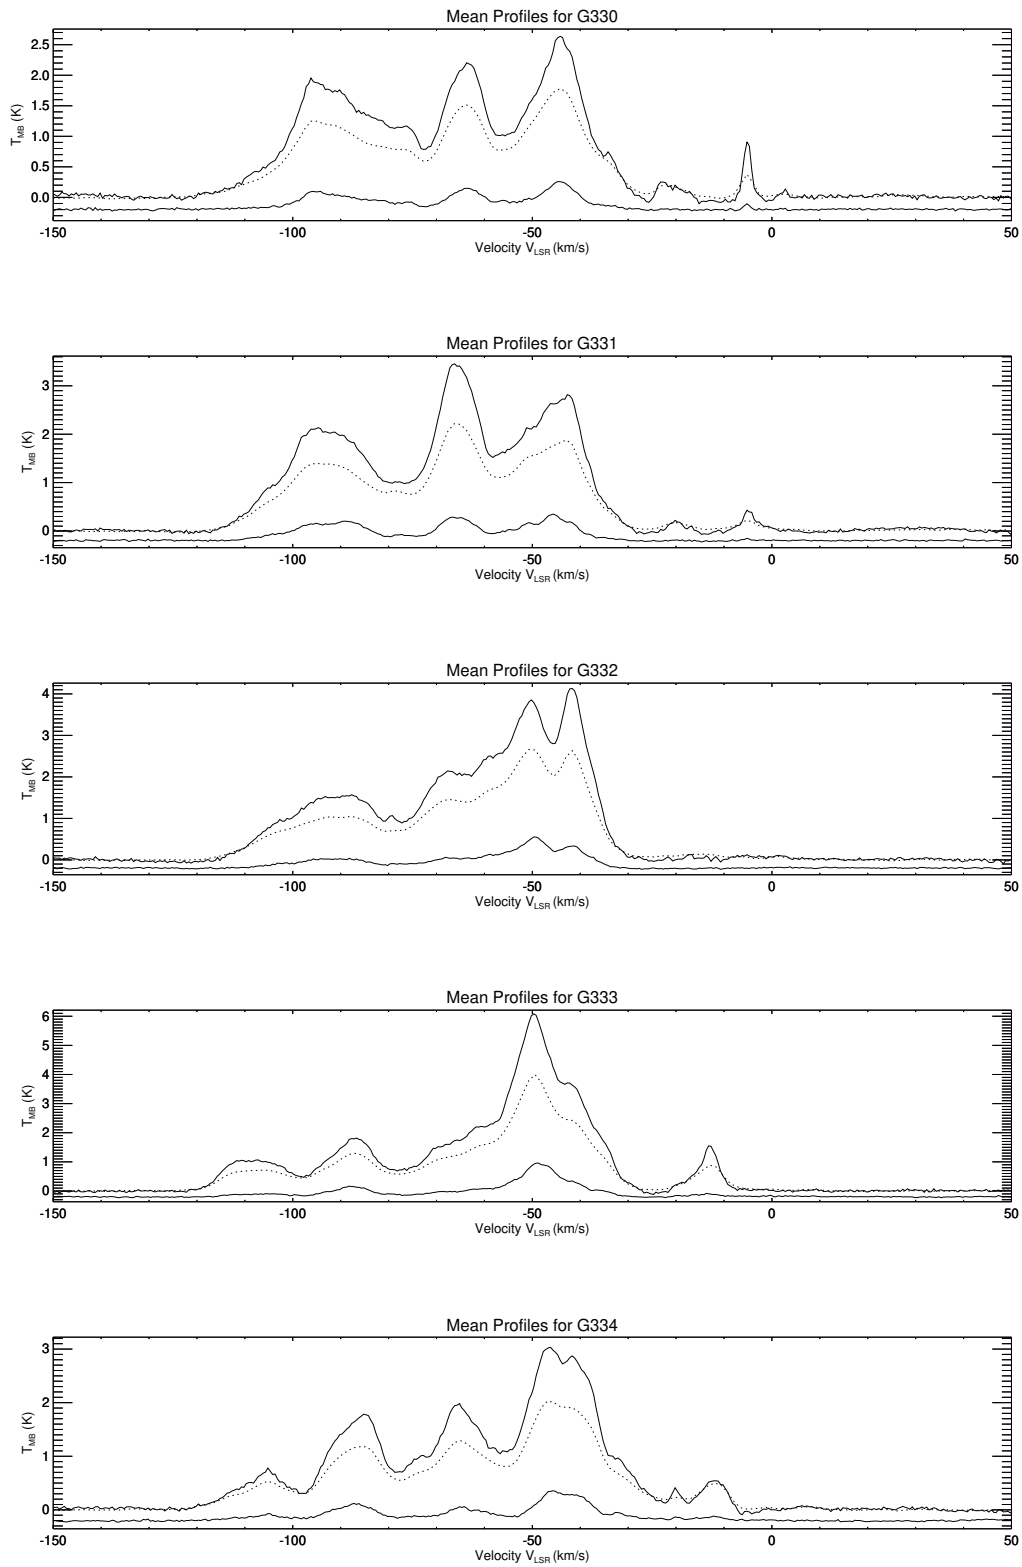

**Figure 28.** Average spectra for each  $1^\circ \times 2^\circ$  along the Galactic Plane between  $l = 330 - 335^\circ$ , labelled by their lower longitude limit, from  $-150 < V_{LSR} < +50$  km  $s^{-1}$ . The dark solid lines are the Mopra  $^{12}\text{CO}$  data, while the lower black lines are the  $^{13}\text{CO}$  emission offset by  $-0.2\text{K}$ . The dashed lines are the equivalent average  $^{12}\text{CO}$  spectra from the Columbia CO Survey (Dame et al., 2001)

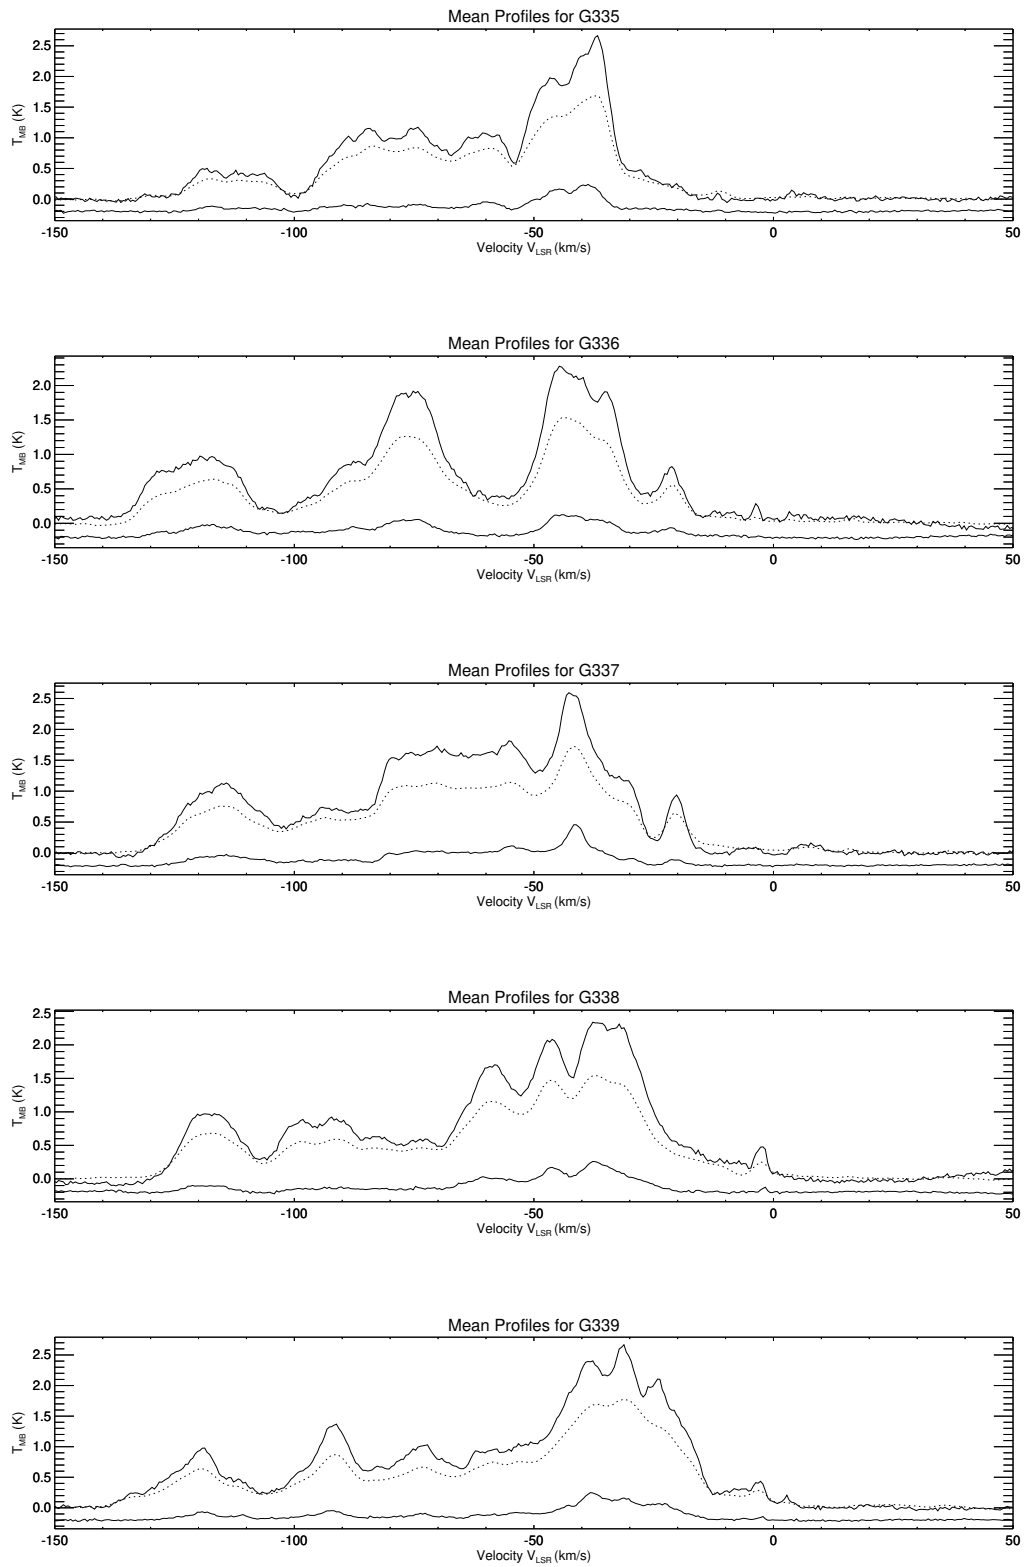

**Figure 29.** Average spectra for each  $1^\circ \times 2^\circ$  along the Galactic Plane between  $l = 335 - 340^\circ$ , labelled by their lower longitude limit, from  $-150 < V_{LSR} < +50 \text{ km s}^{-1}$ . The dark solid lines are the Mopra  $^{12}\text{CO}$  data, while the lower black lines are the  $^{13}\text{CO}$  emission offset by  $-0.2\text{K}$ . The dashed lines are the equivalent average  $^{12}\text{CO}$  spectra from the Columbia CO Survey (Dame et al., 2001)

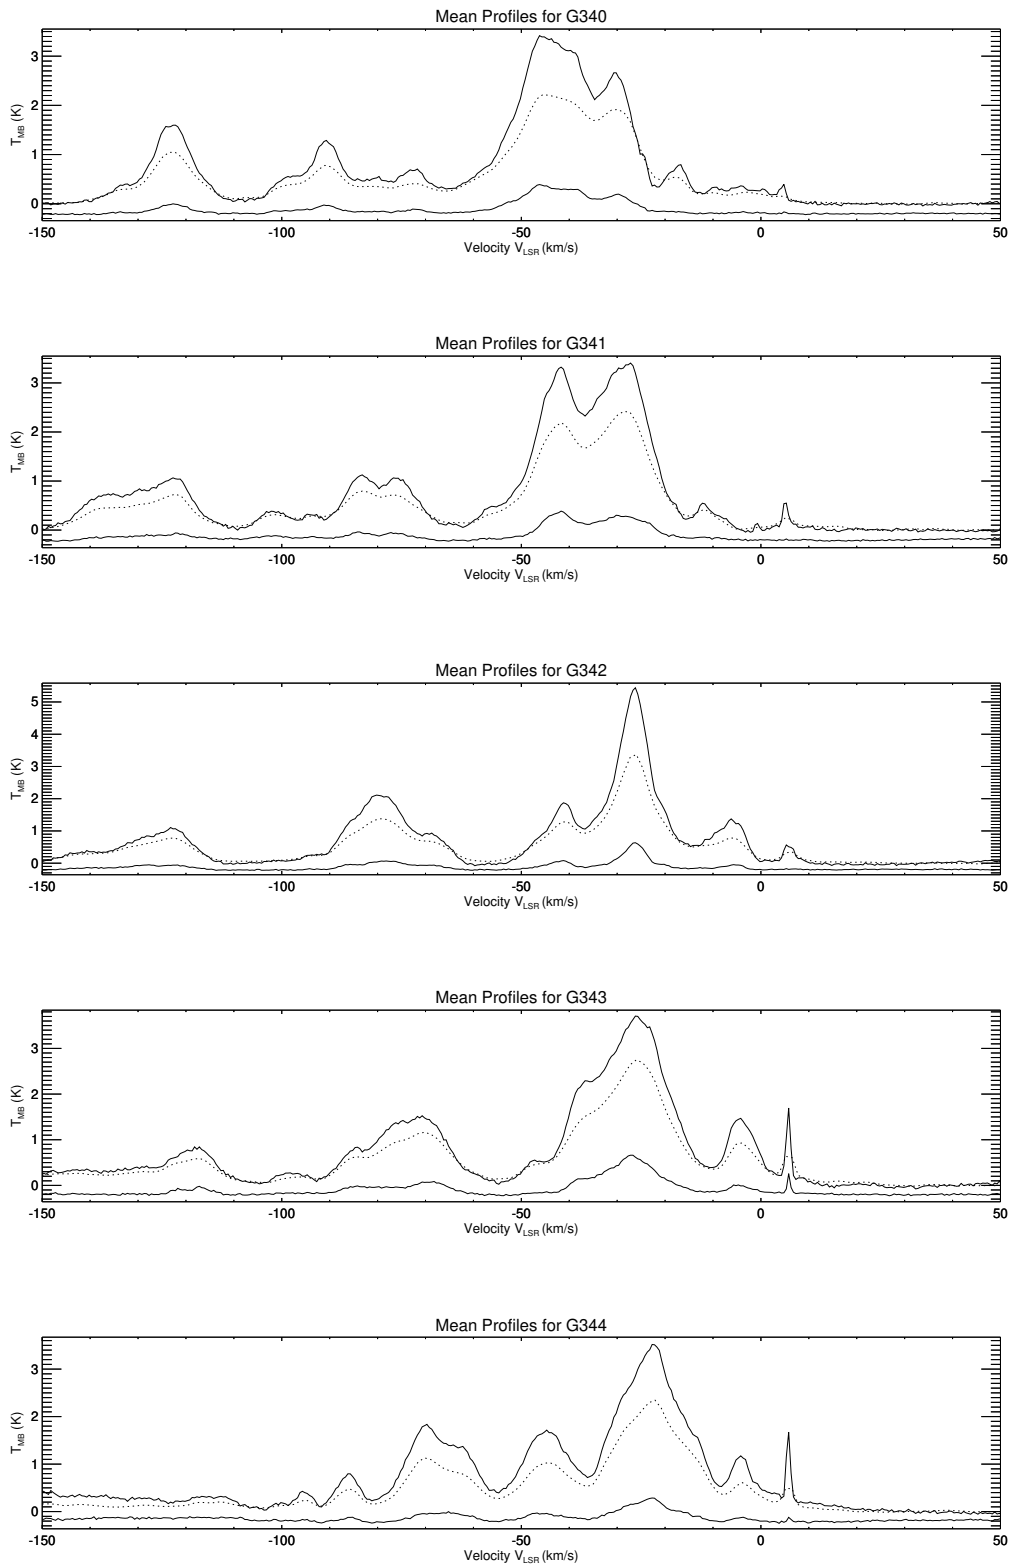

**Figure 30.** Average spectra for each  $1^\circ \times 2^\circ$  along the Galactic Plane between  $l = 340 - 345^\circ$ , labelled by their lower longitude limit, from  $-150 < V_{LSR} < +50 \text{ km s}^{-1}$ . The dark solid lines are the Mopra  $^{12}\text{CO}$  data, while the lower black lines are the  $^{13}\text{CO}$  emission offset by  $-0.2\text{K}$ . The dashed lines are the equivalent average  $^{12}\text{CO}$  spectra from the Columbia CO Survey (Dame *et al.*, 2001)

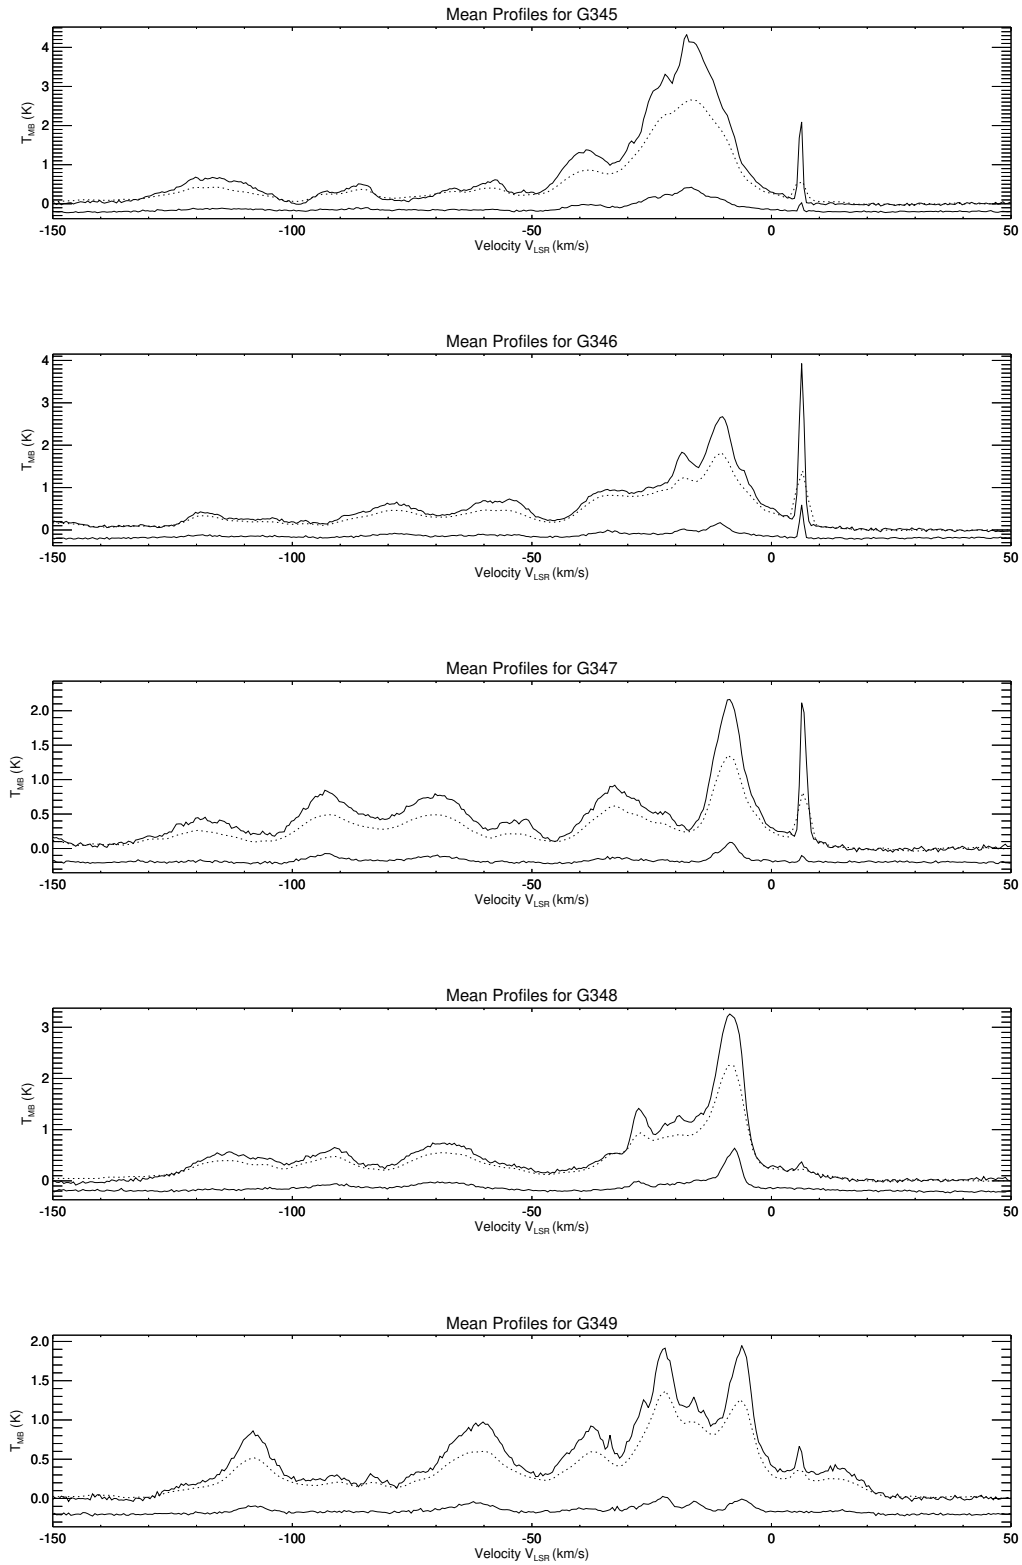

**Figure 31.** Average spectra for each  $1^\circ \times 2^\circ$  along the Galactic Plane between  $l = 345 - 350^\circ$ , labelled by their lower longitude limit, from  $-150 < V_{LSR} < +50 \text{ km s}^{-1}$ . The dark solid lines are the Mopra  $^{12}\text{CO}$  data, while the lower black lines are the  $^{13}\text{CO}$  emission offset by  $-0.2\text{K}$ . The dashed lines are the equivalent average  $^{12}\text{CO}$  spectra from the Columbia CO Survey (Dame et al., 2001)

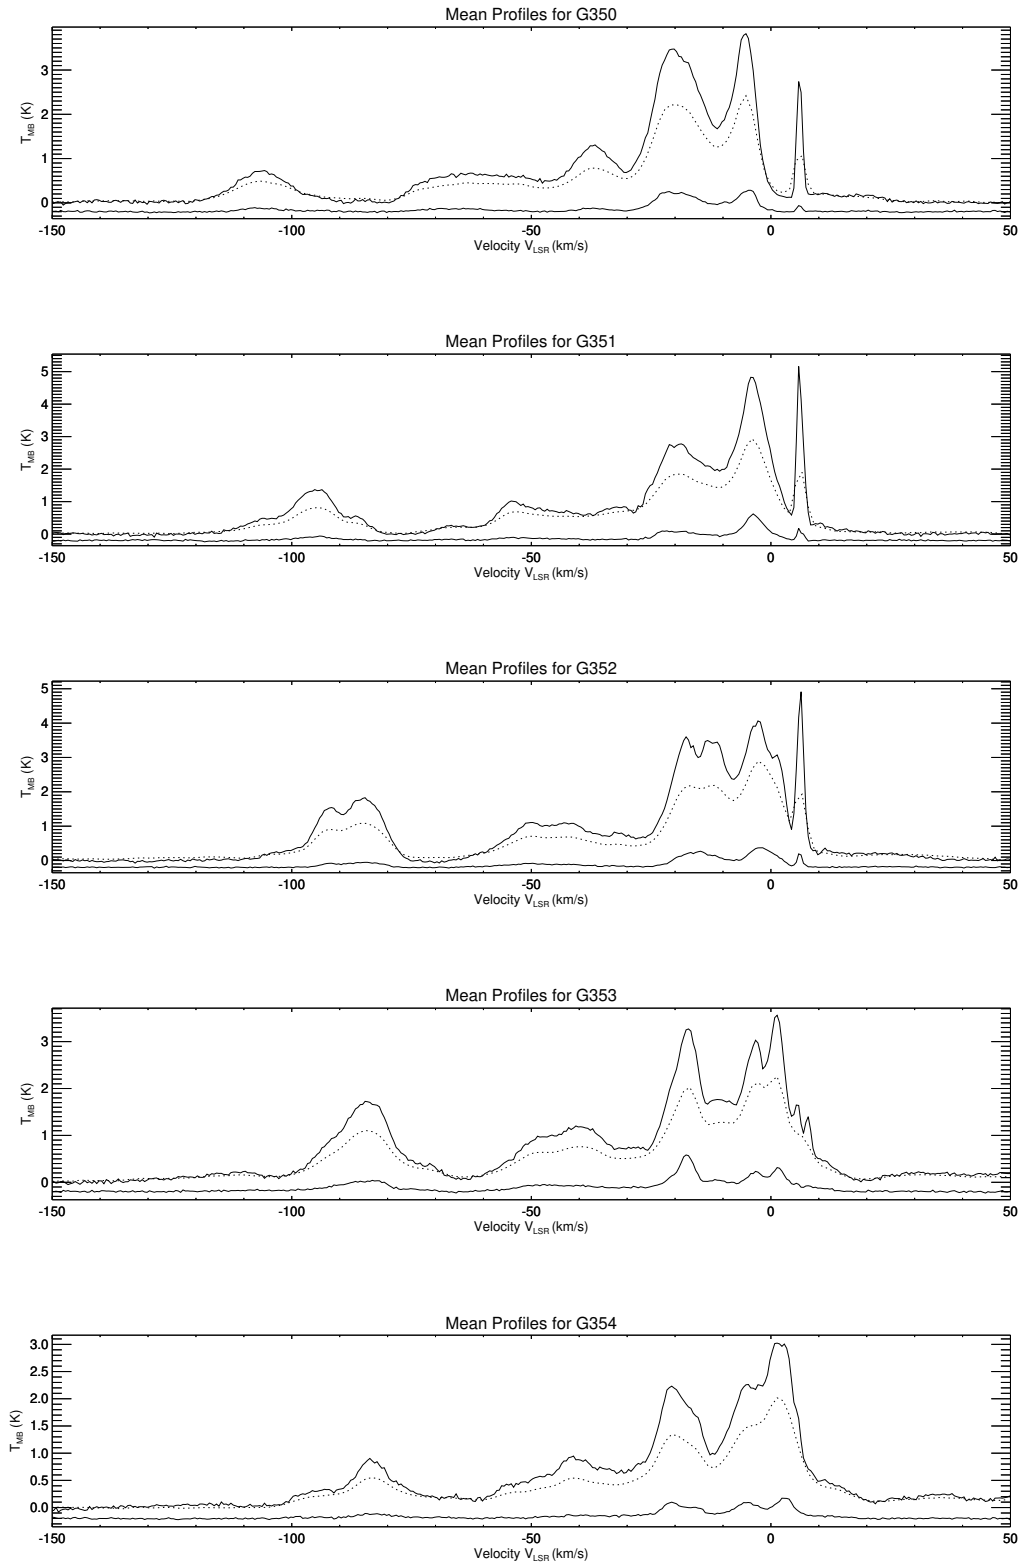

**Figure 32.** Average spectra for each  $1^\circ \times 2^\circ$  along the Galactic Plane between  $l = 350 - 355^\circ$ , labelled by their lower longitude limit, from  $-150 < V_{LSR} < +50$  km s $^{-1}$ . The dark solid lines are the Mopra  $^{12}\text{CO}$  data, while the lower black lines are the  $^{13}\text{CO}$  emission offset by  $-0.2\text{K}$ . The dashed lines are the equivalent average  $^{12}\text{CO}$  spectra from the Columbia CO Survey (Dame et al., 2001)

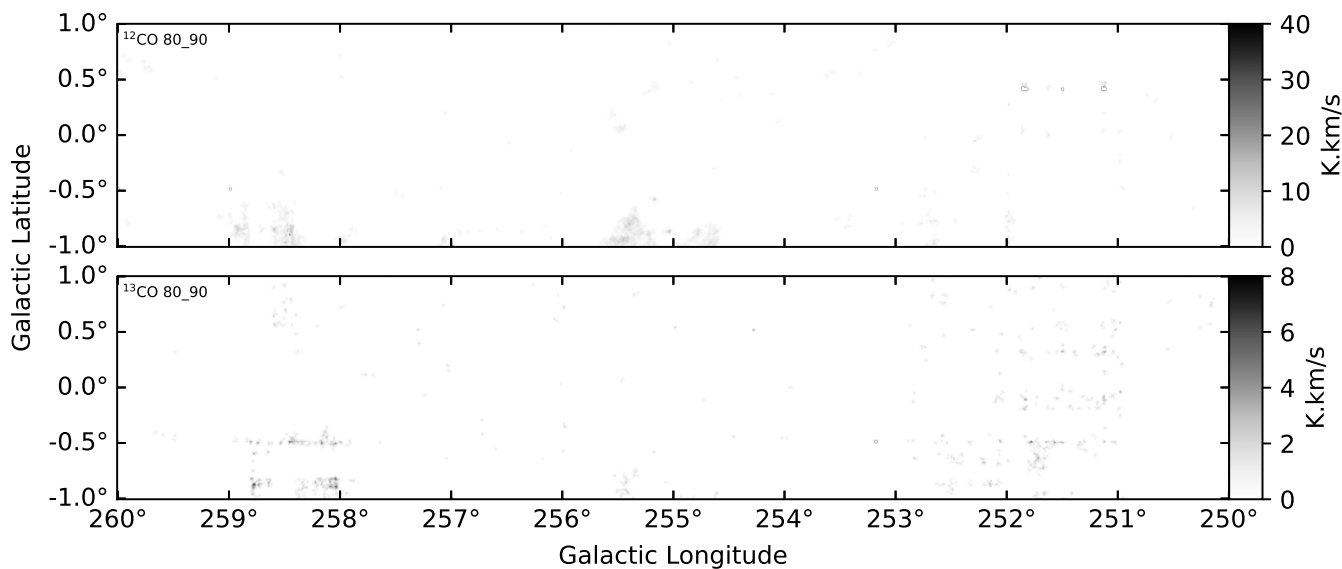

**Figure 33.** Moment 0 image for  $l=250\text{-}260^\circ$  calculated over the velocity interval  $v=80$  to  $90 \text{ km s}^{-1}$  using the main beam intensity,  $T_{MB}$ . The grayscale  $^{12}\text{CO}$  runs from 0 to 40 K.km/s, while the  $^{13}\text{CO}$  from 0 to 8 K.km/s.

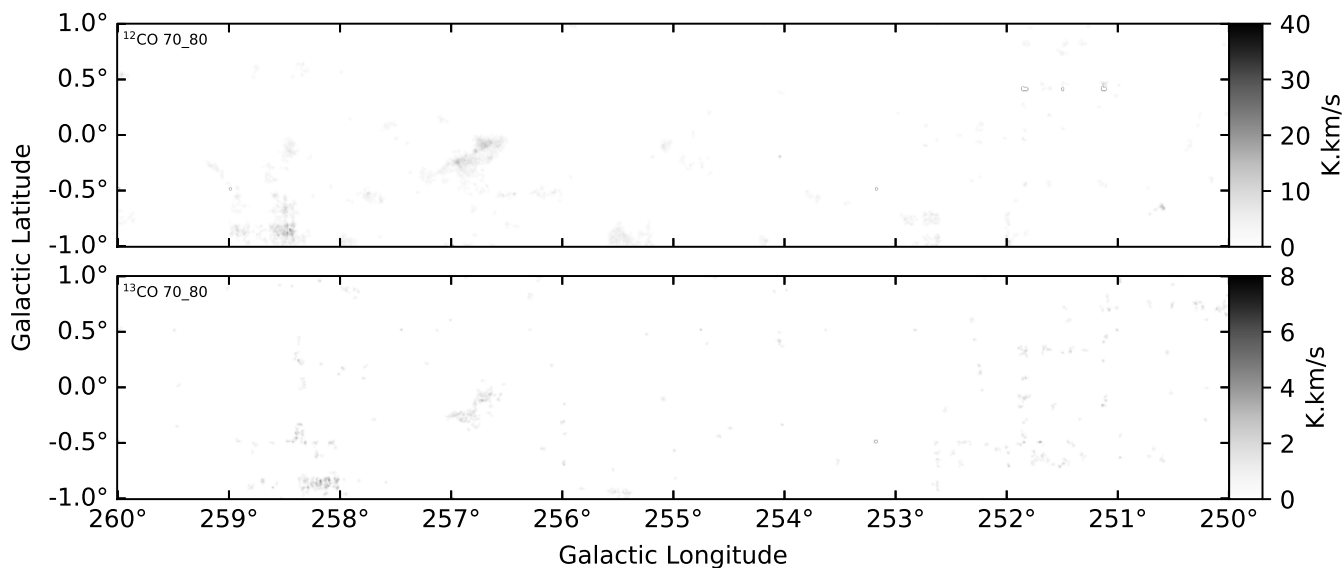

**Figure 34.** Moment 0 image for  $l=250\text{-}260^\circ$  calculated over the velocity interval  $v=70$  to  $80 \text{ km s}^{-1}$  using the main beam intensity,  $T_{MB}$ . The grayscale  $^{12}\text{CO}$  runs from 0 to 40 K.km/s, while the  $^{13}\text{CO}$  from 0 to 8 K.km/s.

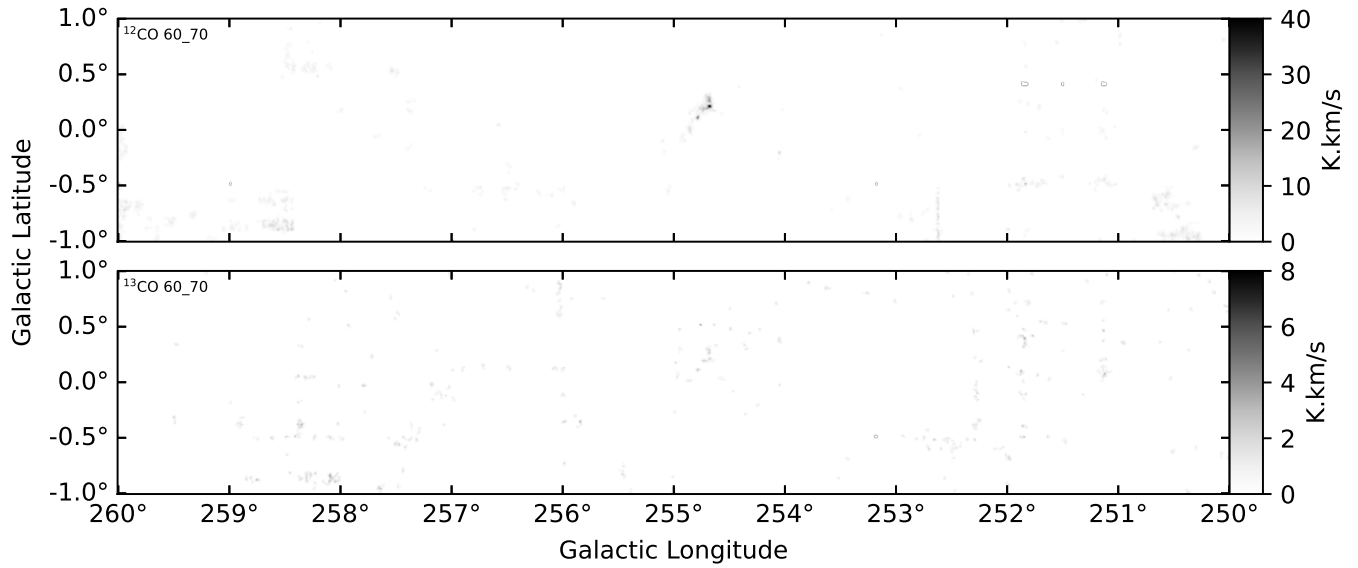

**Figure 35.** Moment 0 image for  $l=250\text{-}260^\circ$  calculated over the velocity interval  $v=60$  to  $70 \text{ km s}^{-1}$  using the main beam intensity,  $T_{MB}$ . The grayscale  $^{12}\text{CO}$  runs from 0 to 40  $\text{K.km/s}$ , while the  $^{13}\text{CO}$  from 0 to 8  $\text{K.km/s}$ .

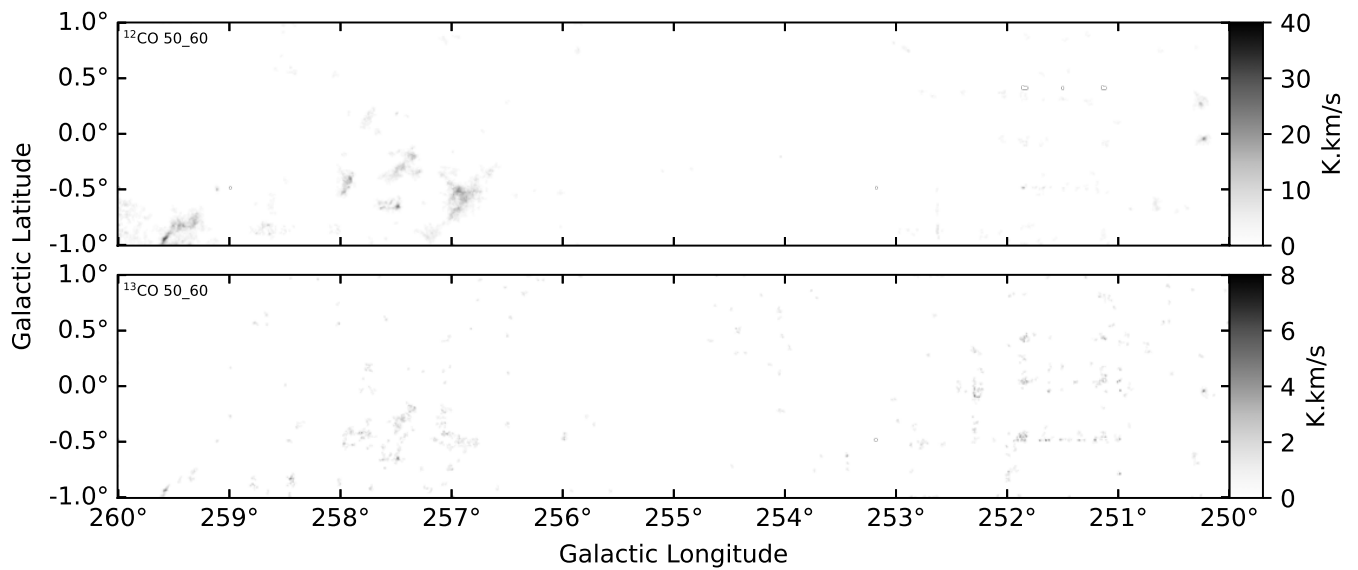

**Figure 36.** Moment 0 image for  $l=250\text{-}260^\circ$  calculated over the velocity interval  $v=50$  to  $60 \text{ km s}^{-1}$  using the main beam intensity,  $T_{MB}$ . The grayscale  $^{12}\text{CO}$  runs from 0 to 40  $\text{K.km/s}$ , while the  $^{13}\text{CO}$  from 0 to 8  $\text{K.km/s}$ .



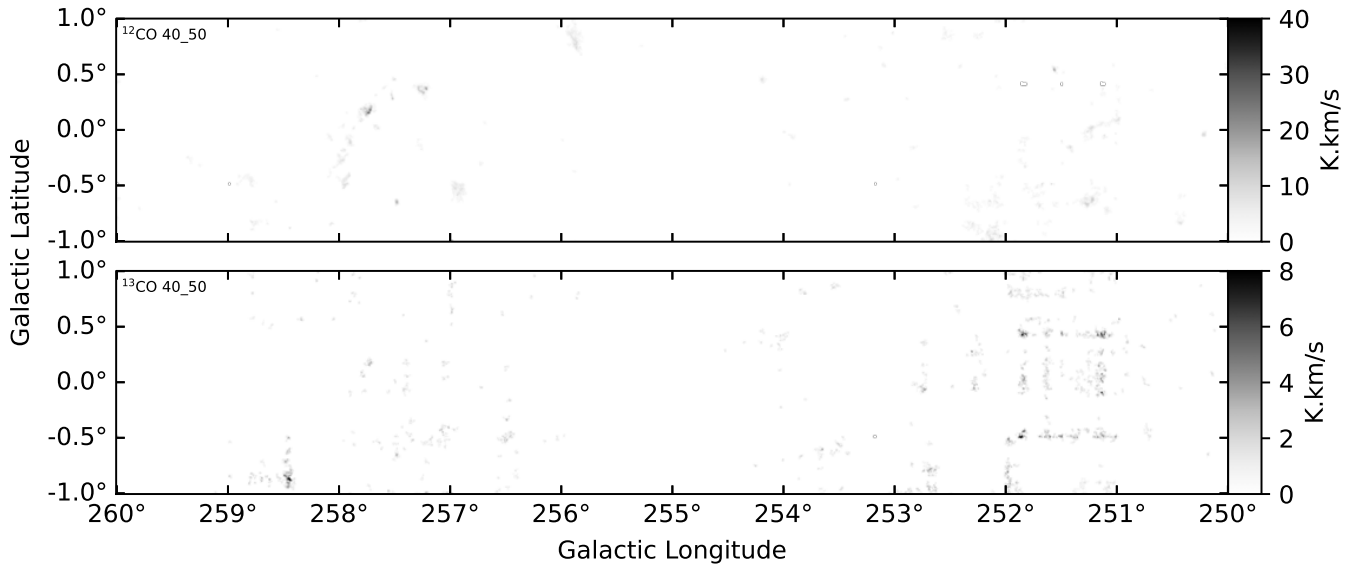

**Figure 37.** Moment 0 image for  $l=250\text{-}260^\circ$  calculated over the velocity interval  $v=40$  to  $50\text{ km s}^{-1}$  using the main beam intensity,  $T_{MB}$ . The grayscale  $^{12}\text{CO}$  runs from 0 to 40 K.km/s, while the  $^{13}\text{CO}$  from 0 to 8 K.km/s.

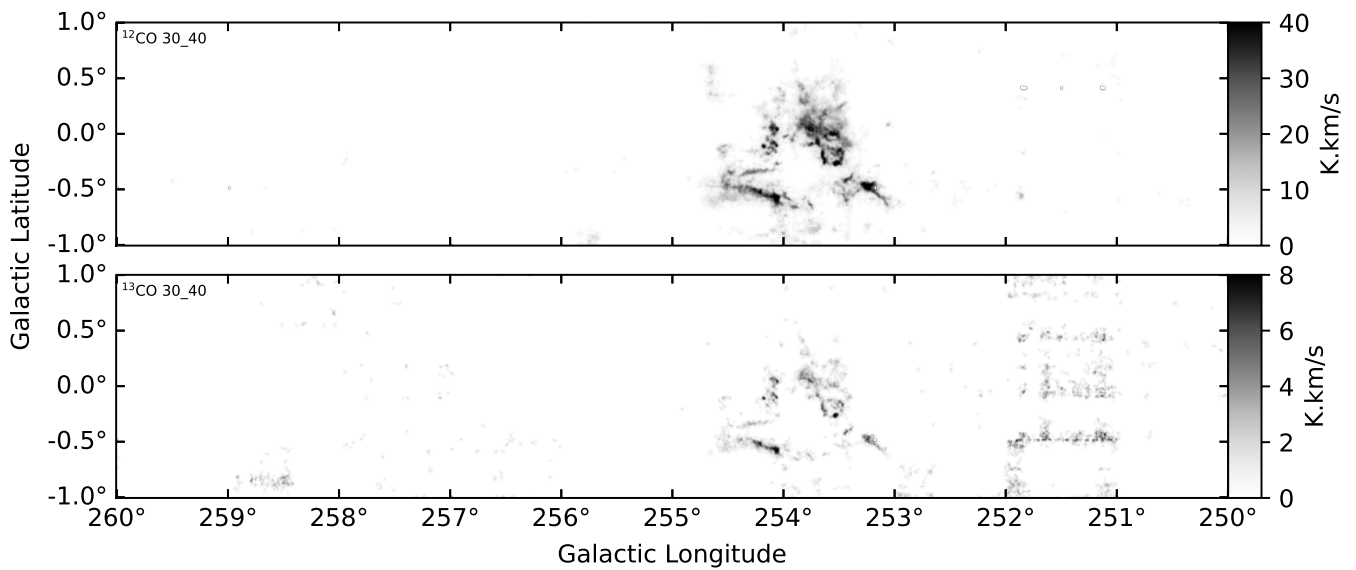

**Figure 38.** Moment 0 image for  $l=250\text{-}260^\circ$  calculated over the velocity interval  $v=30$  to  $40\text{ km s}^{-1}$  using the main beam intensity,  $T_{MB}$ . The grayscale  $^{12}\text{CO}$  runs from 0 to 40 K.km/s, while the  $^{13}\text{CO}$  from 0 to 8 K.km/s.

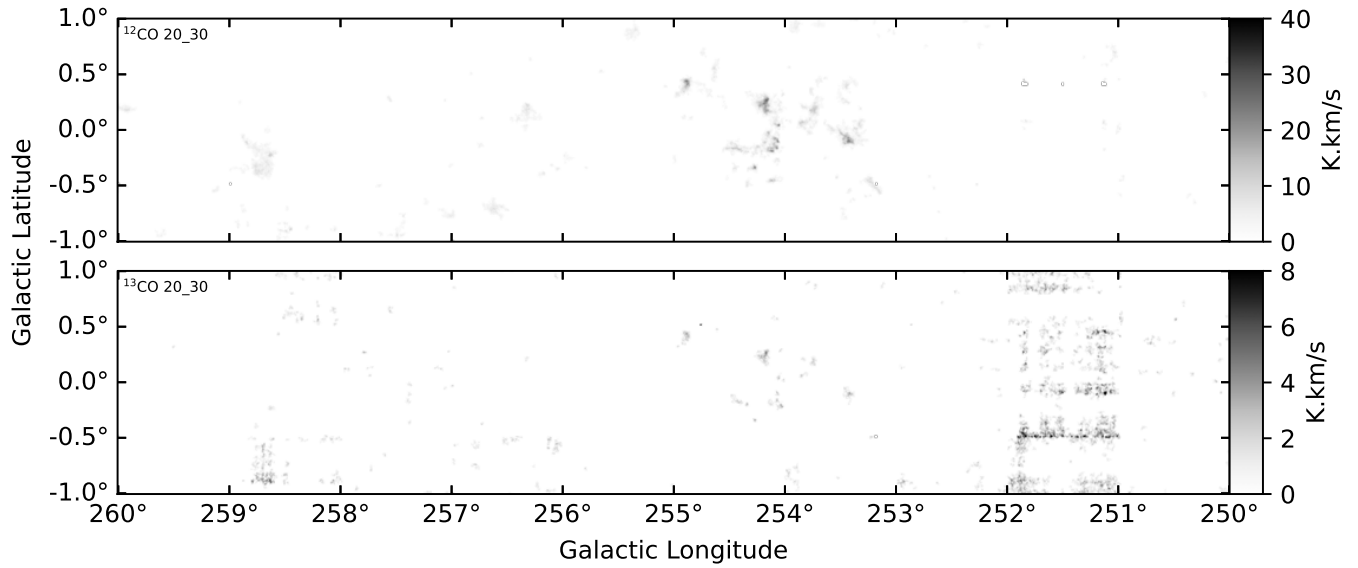

**Figure 39.** Moment 0 image for  $l=250\text{-}260^\circ$  calculated over the velocity interval  $v=20$  to  $30 \text{ km s}^{-1}$  using the main beam intensity,  $T_{MB}$ . The grayscale  $^{12}\text{CO}$  runs from 0 to 40 K.km/s, while the  $^{13}\text{CO}$  from 0 to 8 K.km/s.

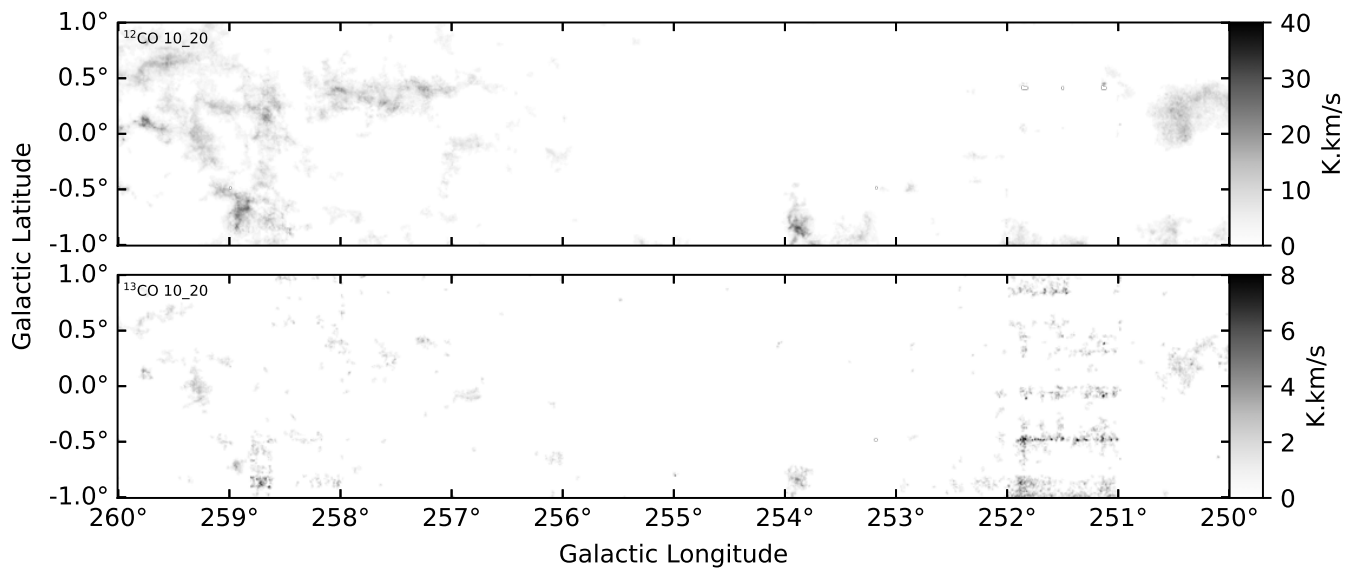

**Figure 40.** Moment 0 image for  $l=250\text{-}260^\circ$  calculated over the velocity interval  $v=10$  to  $20 \text{ km s}^{-1}$  using the main beam intensity,  $T_{MB}$ . The grayscale  $^{12}\text{CO}$  runs from 0 to 40 K.km/s, while the  $^{13}\text{CO}$  from 0 to 8 K.km/s.

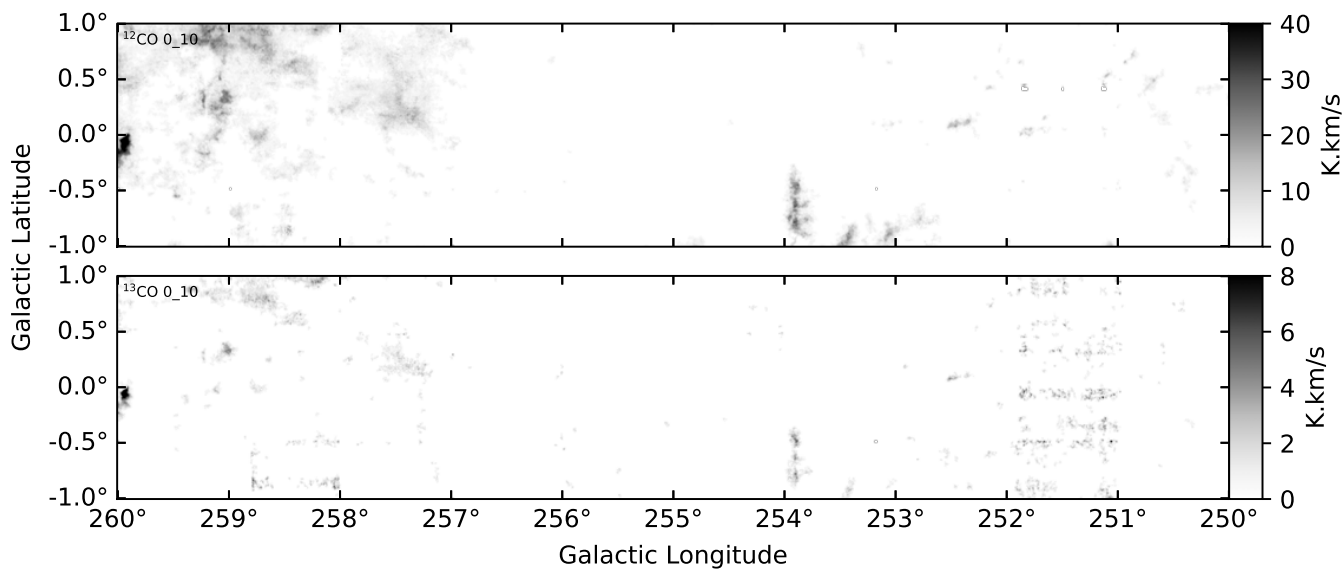

**Figure 41.** Moment 0 image for  $l=250\text{-}260^\circ$  calculated over the velocity interval  $v=0$  to  $10 \text{ km s}^{-1}$  using the main beam intensity,  $T_{MB}$ . The grayscale  $^{12}\text{CO}$  runs from 0 to 40 K.km/s, while the  $^{13}\text{CO}$  from 0 to 8 K.km/s.

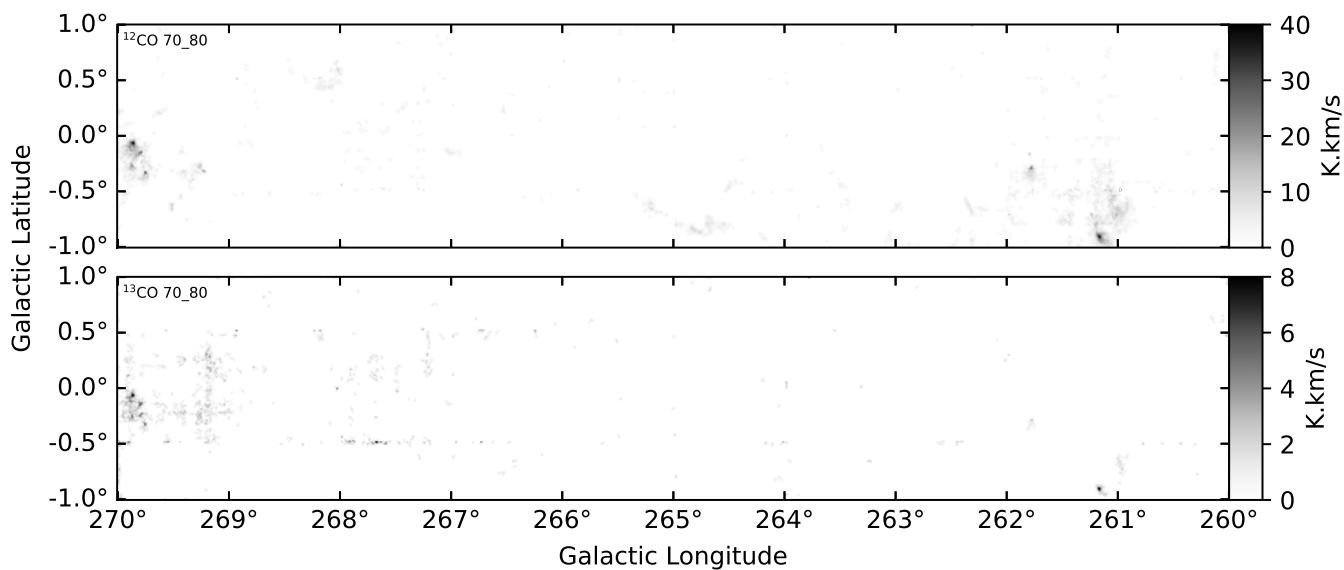

**Figure 42.** Moment 0 image for  $l=260\text{-}270^\circ$  calculated over the velocity interval  $v=70$  to  $80 \text{ km s}^{-1}$  using the main beam intensity,  $T_{MB}$ . The grayscale  $^{12}\text{CO}$  runs from 0 to 40 K.km/s, while the  $^{13}\text{CO}$  from 0 to 8 K.km/s.

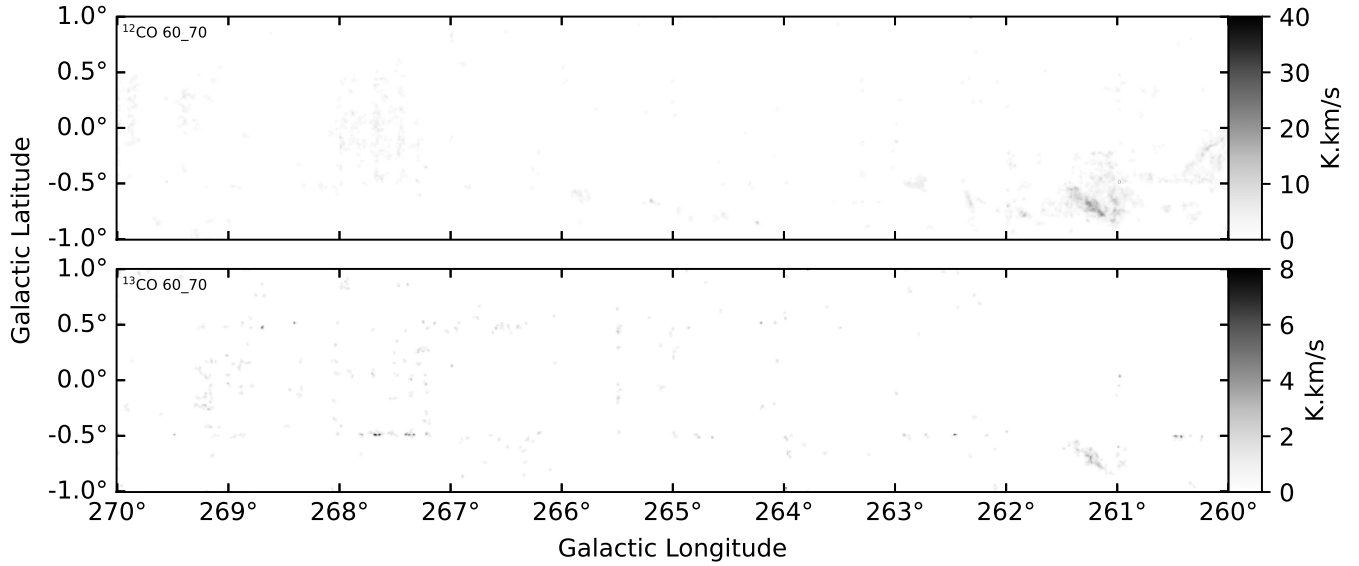

**Figure 43.** Moment 0 image for  $l=260\text{-}270^\circ$  calculated over the velocity interval  $v=60$  to  $70 \text{ km s}^{-1}$  using the main beam intensity,  $T_{MB}$ . The grayscale  $^{12}\text{CO}$  runs from 0 to 40 K.km/s, while the  $^{13}\text{CO}$  from 0 to 8 K.km/s.

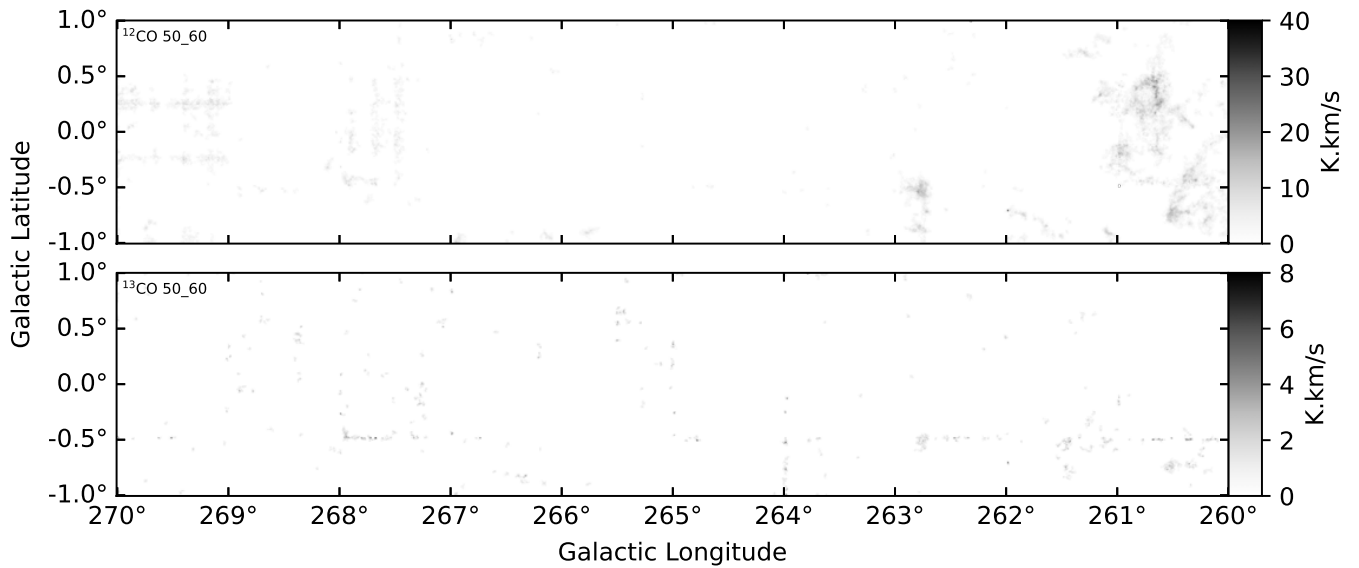

**Figure 44.** Moment 0 image for  $l=260\text{-}270^\circ$  calculated over the velocity interval  $v=50$  to  $60 \text{ km s}^{-1}$  using the main beam intensity,  $T_{MB}$ . The grayscale  $^{12}\text{CO}$  runs from 0 to 40 K.km/s, while the  $^{13}\text{CO}$  from 0 to 8 K.km/s.

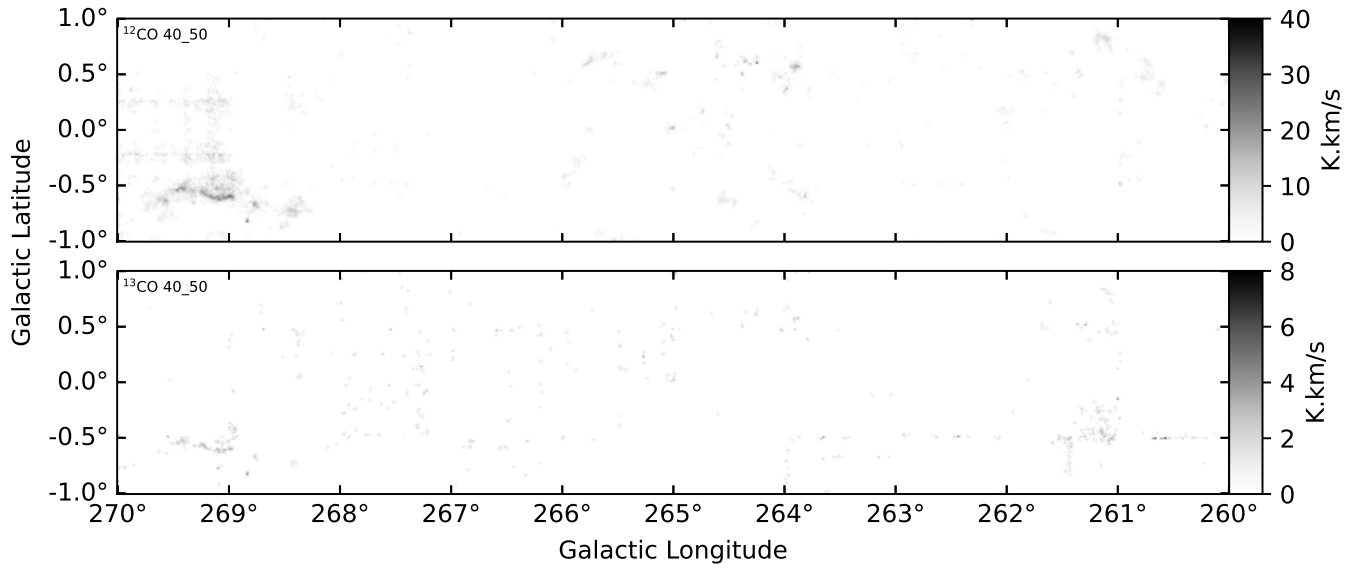

**Figure 45.** Moment 0 image for  $l=260\text{-}270^\circ$  calculated over the velocity interval  $v=40$  to  $50 \text{ km s}^{-1}$  using the main beam intensity,  $T_{MB}$ . The grayscale  $^{12}\text{CO}$  runs from 0 to 40 K.km/s, while the  $^{13}\text{CO}$  from 0 to 8 K.km/s.

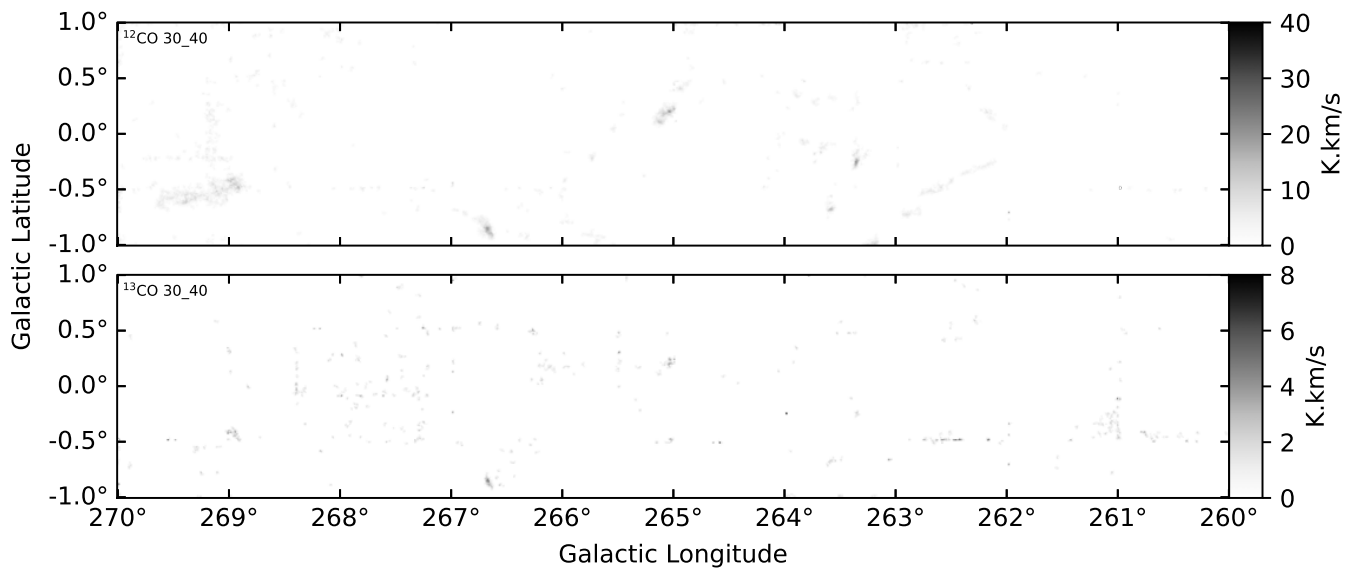

**Figure 46.** Moment 0 image for  $l=260\text{-}270^\circ$  calculated over the velocity interval  $v=30$  to  $40 \text{ km s}^{-1}$  using the main beam intensity,  $T_{MB}$ . The grayscale  $^{12}\text{CO}$  runs from 0 to 40 K.km/s, while the  $^{13}\text{CO}$  from 0 to 8 K.km/s.

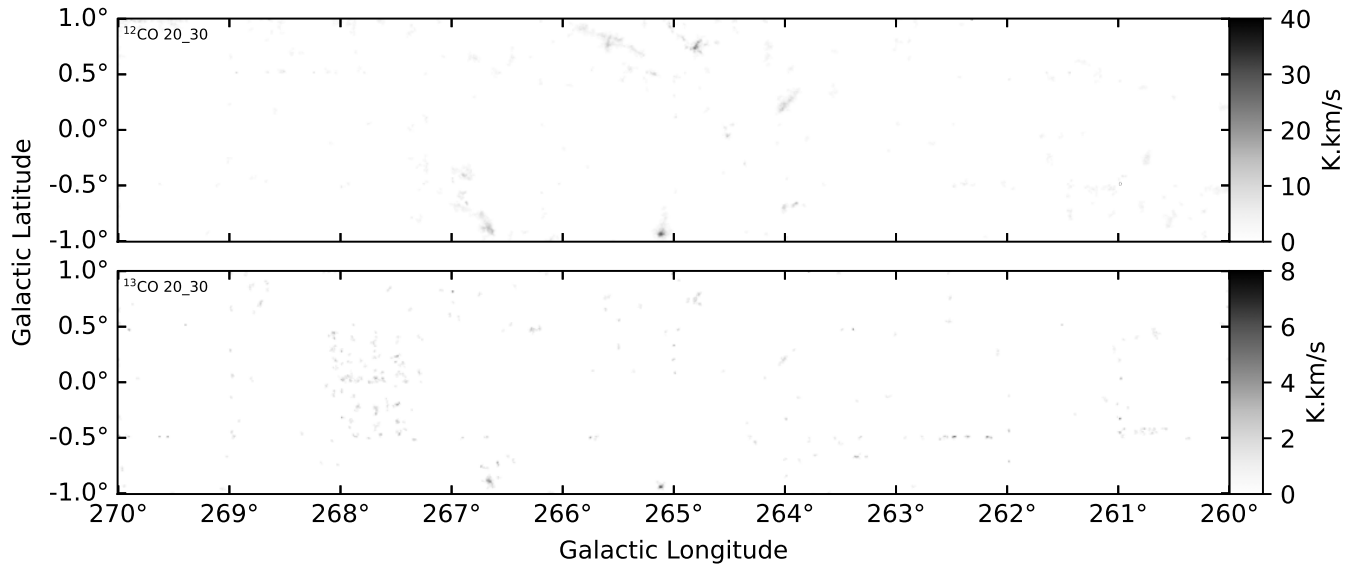

**Figure 47.** Moment 0 image for  $l=260\text{-}270^\circ$  calculated over the velocity interval  $v=20$  to  $30 \text{ km s}^{-1}$  using the main beam intensity,  $T_{MB}$ . The grayscale  $^{12}\text{CO}$  runs from 0 to 40 K.km/s, while the  $^{13}\text{CO}$  from 0 to 8 K.km/s.

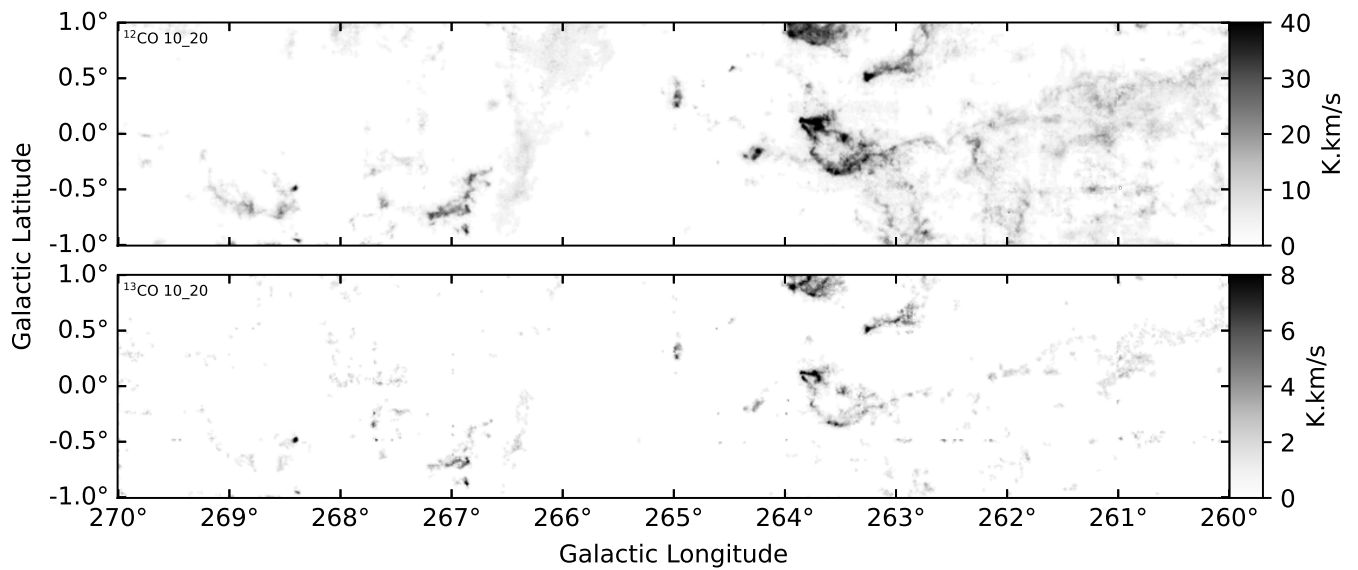

**Figure 48.** Moment 0 image for  $l=260\text{-}270^\circ$  calculated over the velocity interval  $v=10$  to  $20 \text{ km s}^{-1}$  using the main beam intensity,  $T_{MB}$ . The grayscale  $^{12}\text{CO}$  runs from 0 to 40 K.km/s, while the  $^{13}\text{CO}$  from 0 to 8 K.km/s.

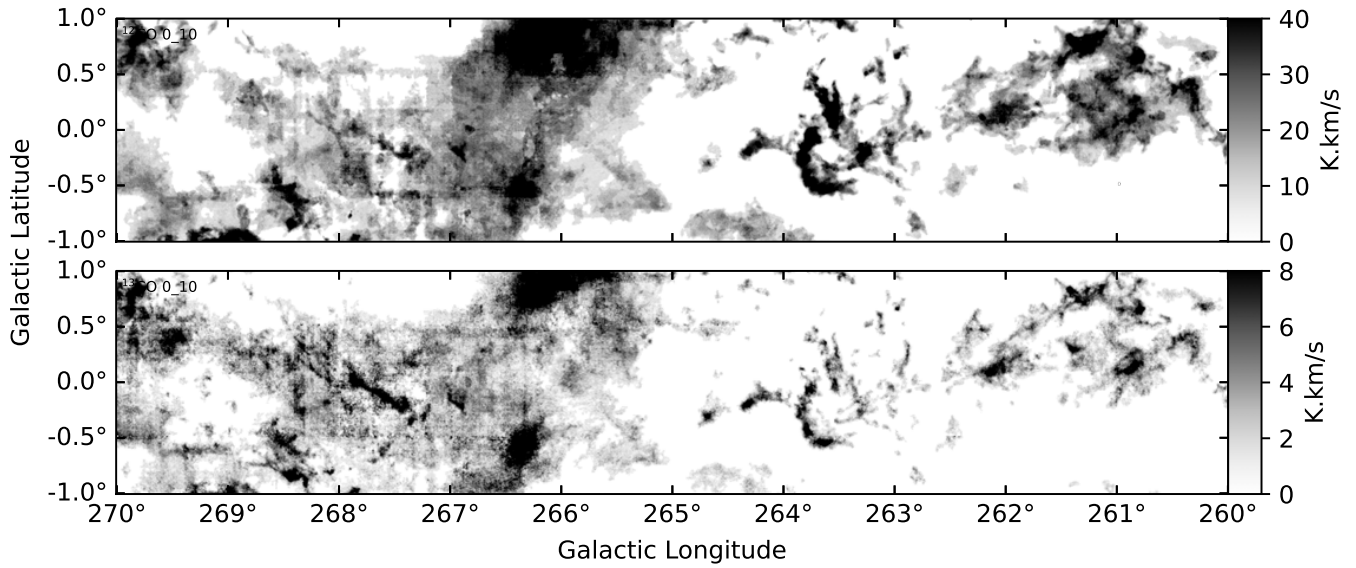

**Figure 49.** Moment 0 image for  $l=260\text{-}270^\circ$  calculated over the velocity interval  $v=0$  to  $10\text{ km s}^{-1}$  using the main beam intensity,  $T_{MB}$ . The grayscale  $^{12}\text{CO}$  runs from 0 to 40  $\text{K.km/s}$ , while the  $^{13}\text{CO}$  from 0 to 8  $\text{K.km/s}$ .

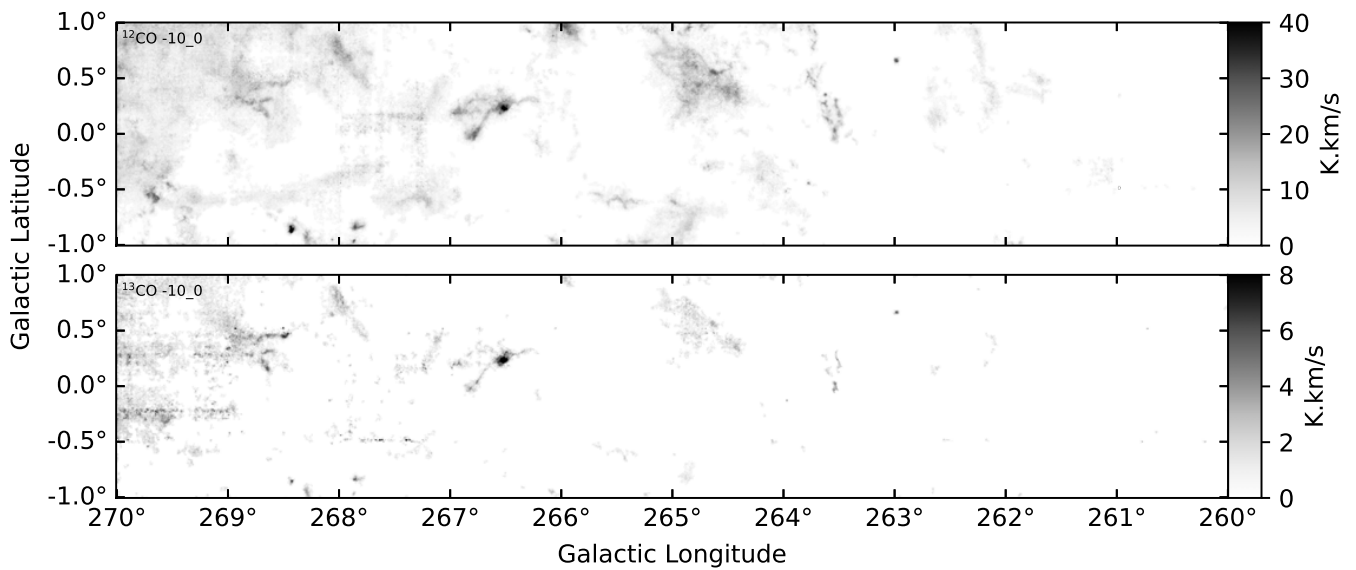

**Figure 50.** Moment 0 image for  $l=260\text{-}270^\circ$  calculated over the velocity interval  $v=-10$  to  $0\text{ km s}^{-1}$  using the main beam intensity,  $T_{MB}$ . The grayscale  $^{12}\text{CO}$  runs from 0 to 40  $\text{K.km/s}$ , while the  $^{13}\text{CO}$  from 0 to 8  $\text{K.km/s}$ .

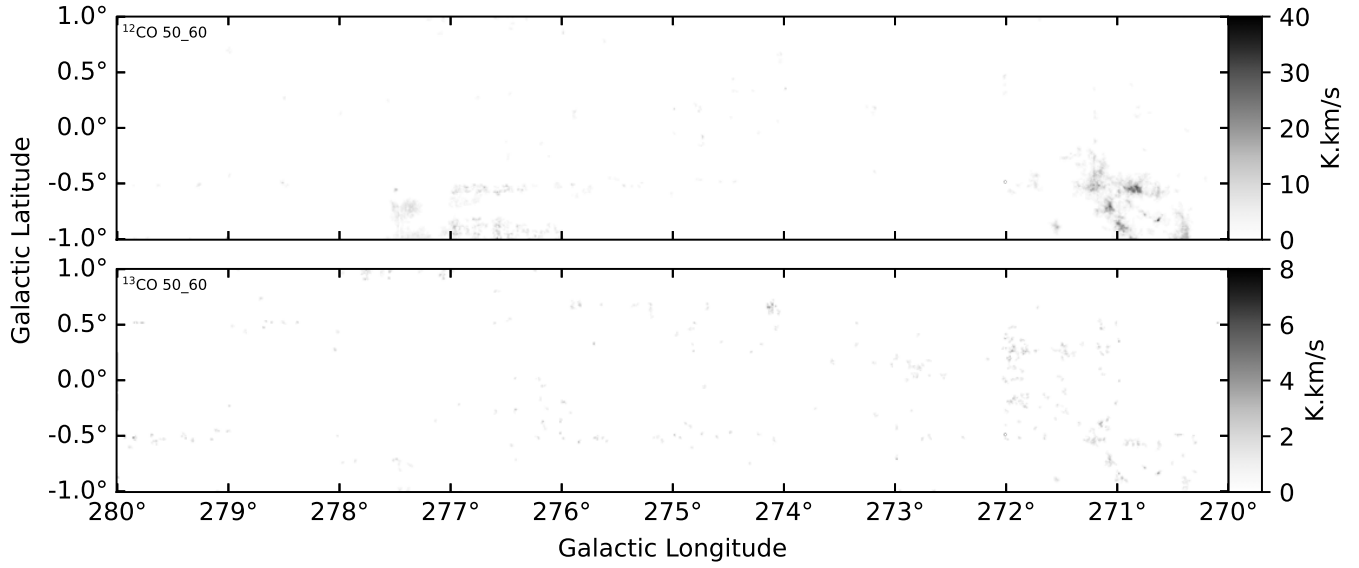

**Figure 51.** Moment 0 image for  $l=270\text{-}280^\circ$  calculated over the velocity interval  $v=50$  to  $60 \text{ km s}^{-1}$  using the main beam intensity,  $T_{MB}$ . The grayscale  $^{12}\text{CO}$  runs from 0 to 40 K.km/s, while the  $^{13}\text{CO}$  from 0 to 8 K.km/s.

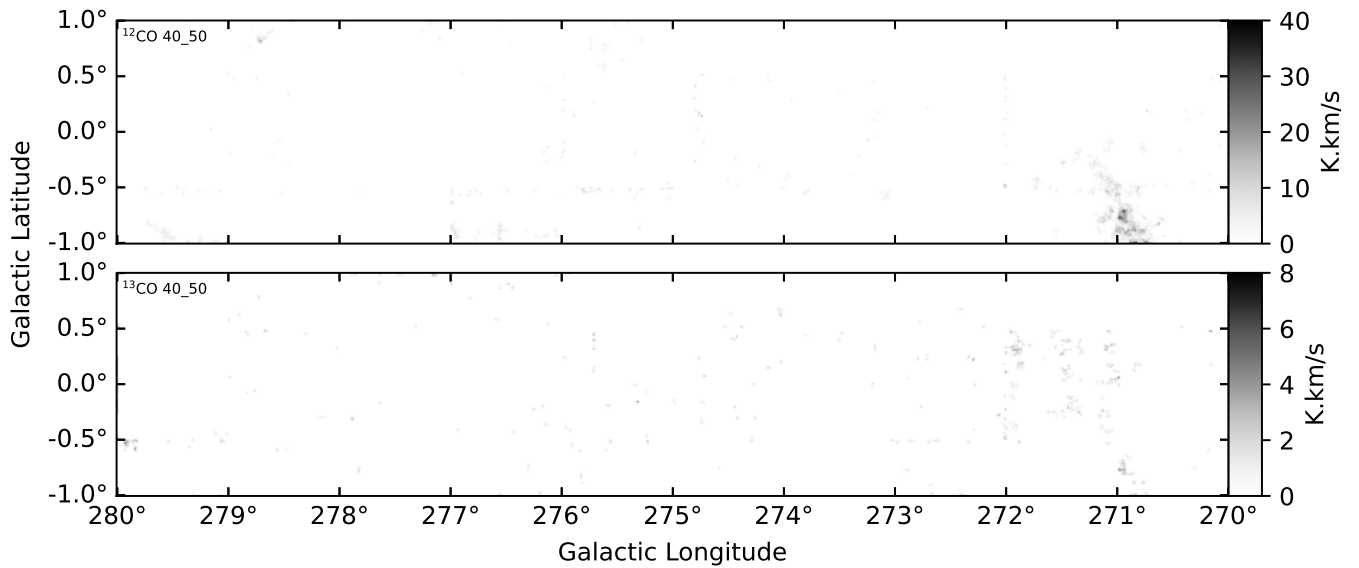

**Figure 52.** Moment 0 image for  $l=270\text{-}280^\circ$  calculated over the velocity interval  $v=40$  to  $50 \text{ km s}^{-1}$  using the main beam intensity,  $T_{MB}$ . The grayscale  $^{12}\text{CO}$  runs from 0 to 40 K.km/s, while the  $^{13}\text{CO}$  from 0 to 8 K.km/s.



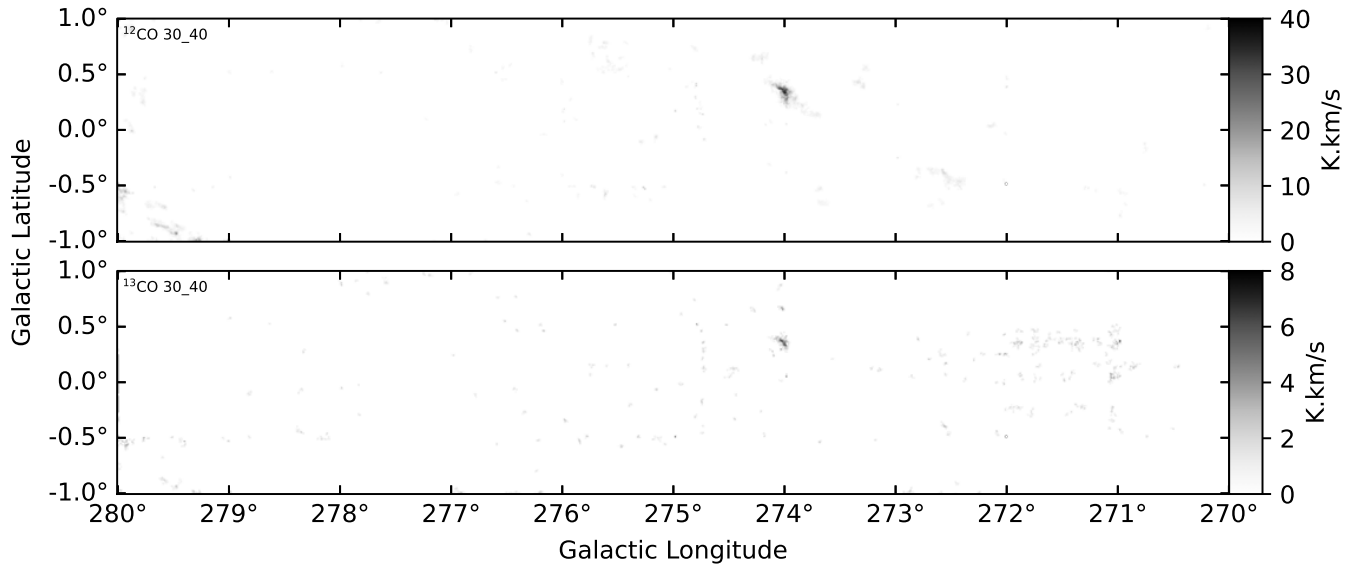

**Figure 53.** Moment 0 image for  $l=270-280^\circ$  calculated over the velocity interval  $v=30$  to  $40 \text{ km s}^{-1}$  using the main beam intensity,  $T_{MB}$ . The grayscale  $^{12}\text{CO}$  runs from 0 to 40 K.km/s, while the  $^{13}\text{CO}$  from 0 to 8 K.km/s.

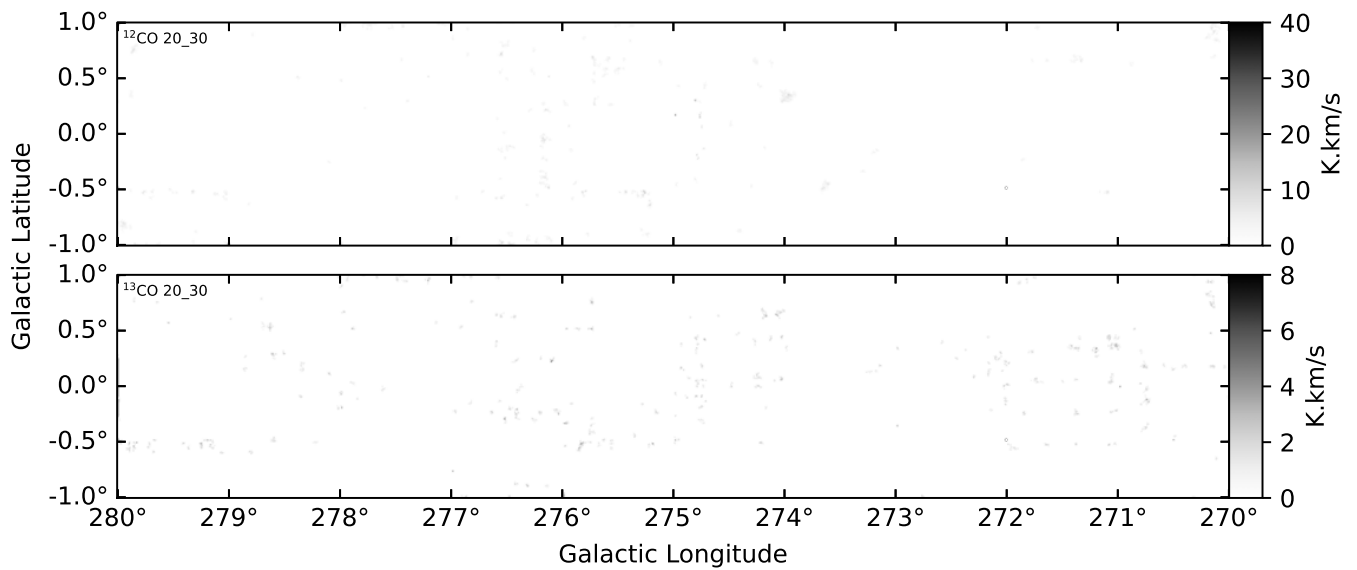

**Figure 54.** Moment 0 image for  $l=270-280^\circ$  calculated over the velocity interval  $v=20$  to  $30 \text{ km s}^{-1}$  using the main beam intensity,  $T_{MB}$ . The grayscale  $^{12}\text{CO}$  runs from 0 to 40 K.km/s, while the  $^{13}\text{CO}$  from 0 to 8 K.km/s.

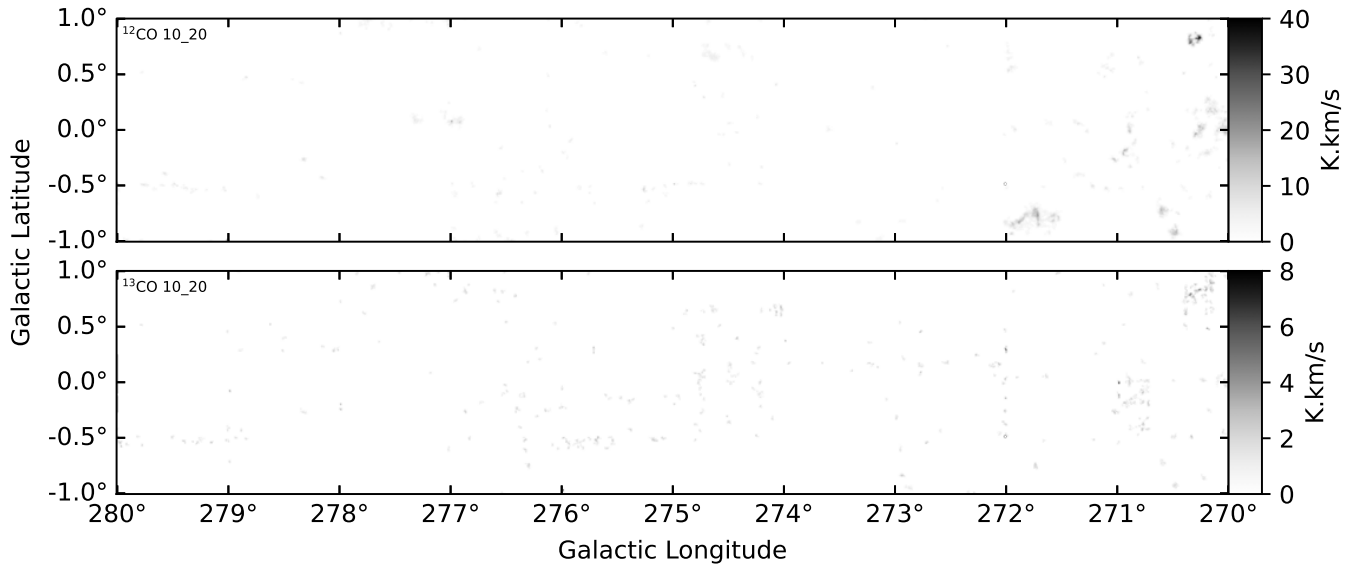

**Figure 55.** Moment 0 image for  $l=270\text{--}280^\circ$  calculated over the velocity interval  $v=10$  to  $20 \text{ km s}^{-1}$  using the main beam intensity,  $T_{MB}$ . The grayscale  $^{12}\text{CO}$  runs from 0 to 40 K.km/s, while the  $^{13}\text{CO}$  from 0 to 8 K.km/s.

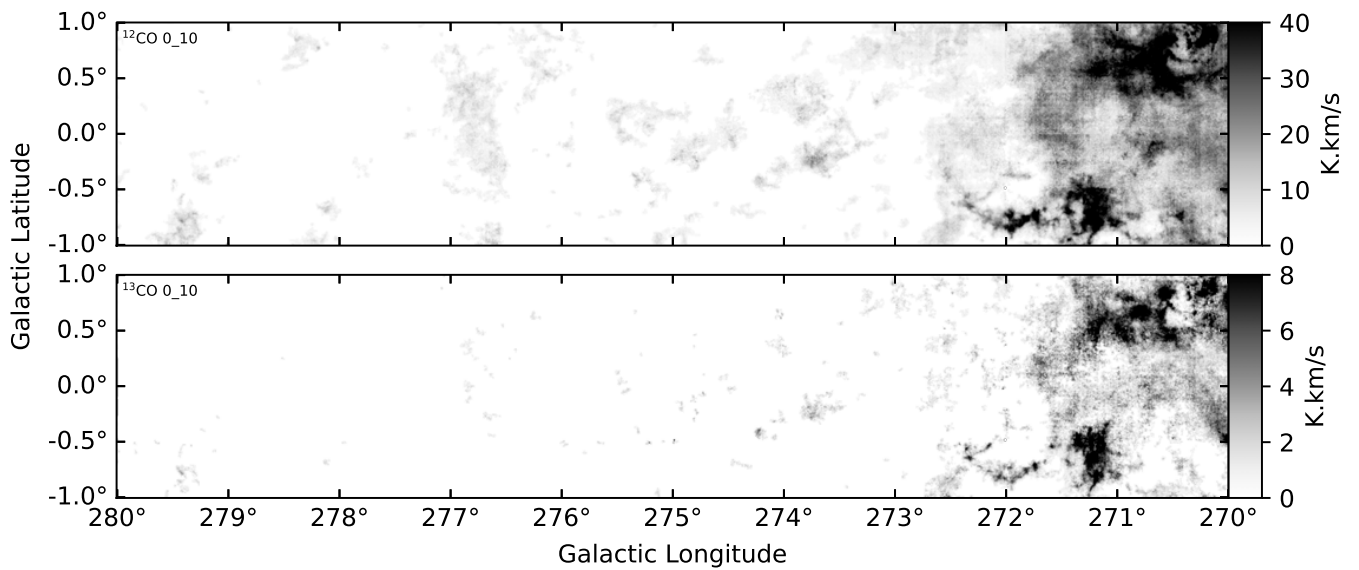

**Figure 56.** Moment 0 image for  $l=270\text{--}280^\circ$  calculated over the velocity interval  $v=0$  to  $10 \text{ km s}^{-1}$  using the main beam intensity,  $T_{MB}$ . The grayscale  $^{12}\text{CO}$  runs from 0 to 40 K.km/s, while the  $^{13}\text{CO}$  from 0 to 8 K.km/s.

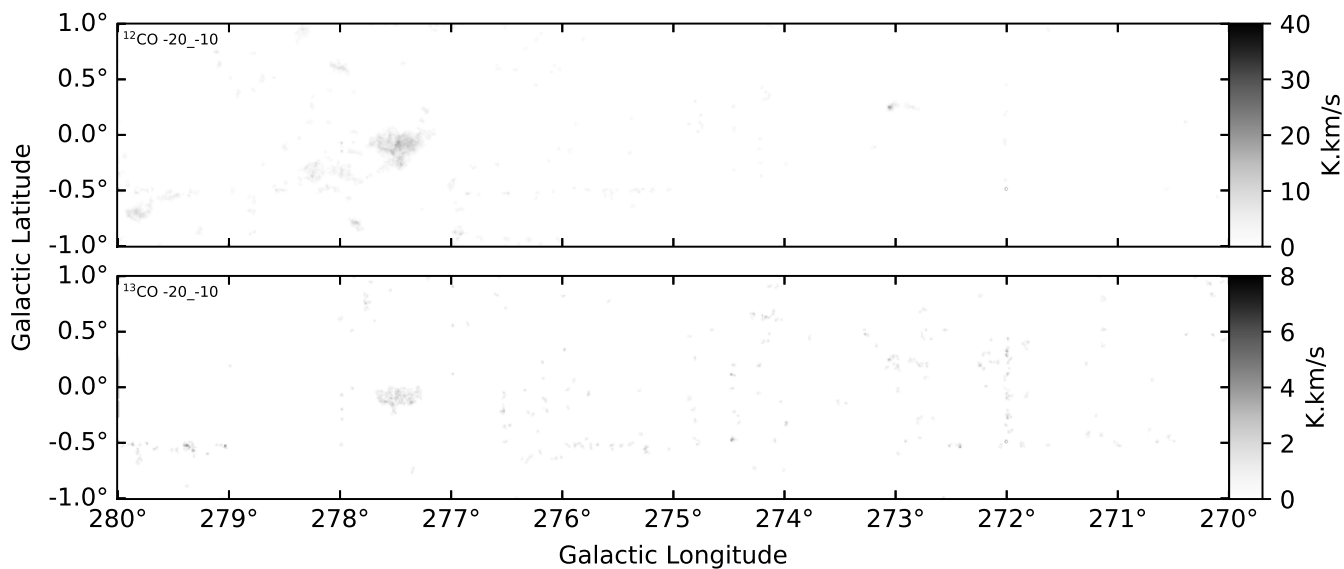

**Figure 57.** Moment 0 image for  $l=270\text{--}280^\circ$  calculated over the velocity interval  $v=-20$  to  $-10\text{ km s}^{-1}$  using the main beam intensity,  $T_{MB}$ . The grayscale  $^{12}\text{CO}$  runs from 0 to 40 K.km/s, while the  $^{13}\text{CO}$  from 0 to 8 K.km/s.

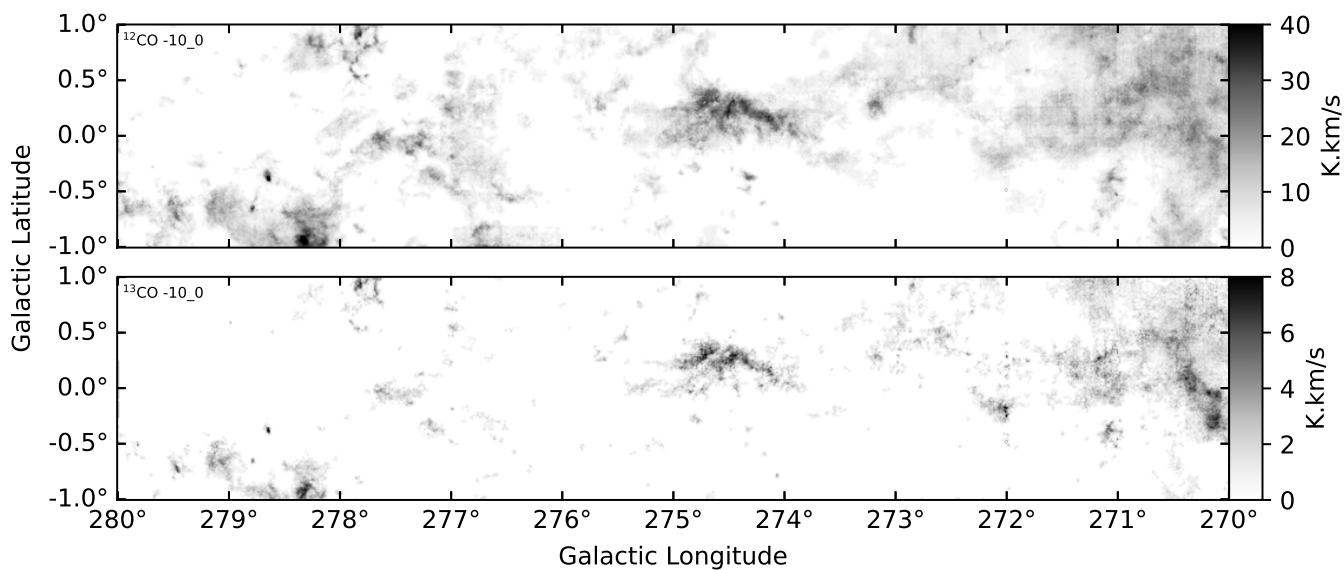

**Figure 58.** Moment 0 image for  $l=270\text{--}280^\circ$  calculated over the velocity interval  $v=-10$  to  $0\text{ km s}^{-1}$  using the main beam intensity,  $T_{MB}$ . The grayscale  $^{12}\text{CO}$  runs from 0 to 40 K.km/s, while the  $^{13}\text{CO}$  from 0 to 8 K.km/s.

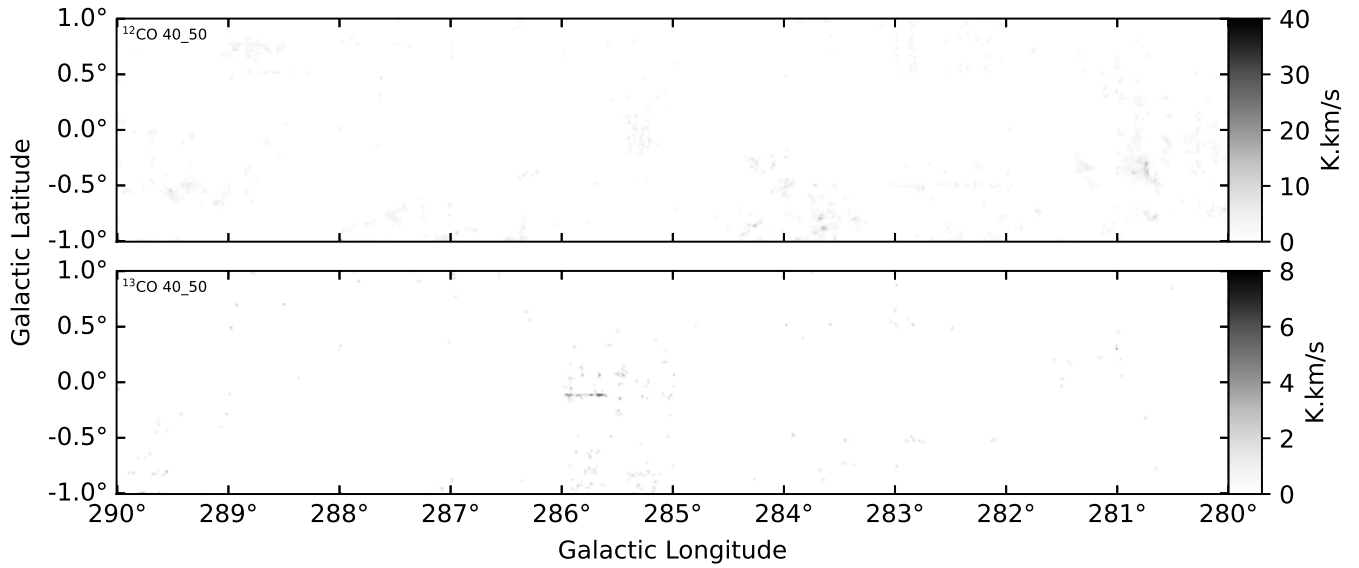

**Figure 59.** Moment 0 image for  $l=280-290^\circ$  calculated over the velocity interval  $v=40$  to  $50 \text{ km s}^{-1}$  using the main beam intensity,  $T_{MB}$ . The grayscale  $^{12}\text{CO}$  runs from 0 to 40 K.km/s, while the  $^{13}\text{CO}$  from 0 to 8 K.km/s.

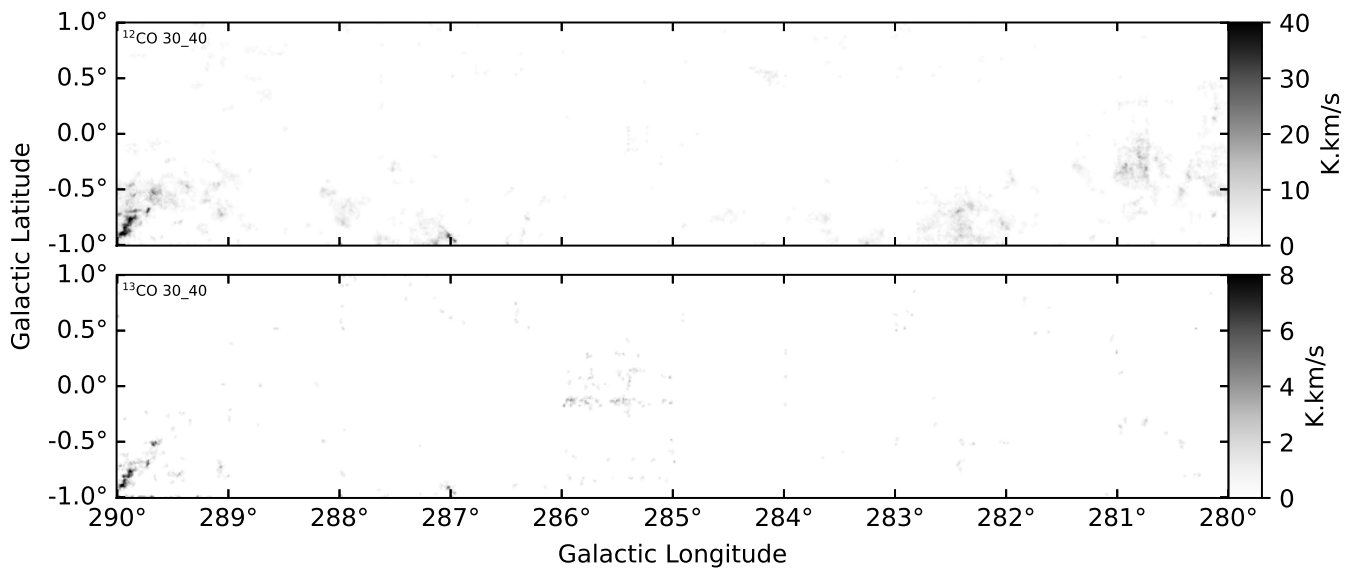

**Figure 60.** Moment 0 image for  $l=280-290^\circ$  calculated over the velocity interval  $v=30$  to  $40 \text{ km s}^{-1}$  using the main beam intensity,  $T_{MB}$ . The grayscale  $^{12}\text{CO}$  runs from 0 to 40 K.km/s, while the  $^{13}\text{CO}$  from 0 to 8 K.km/s.

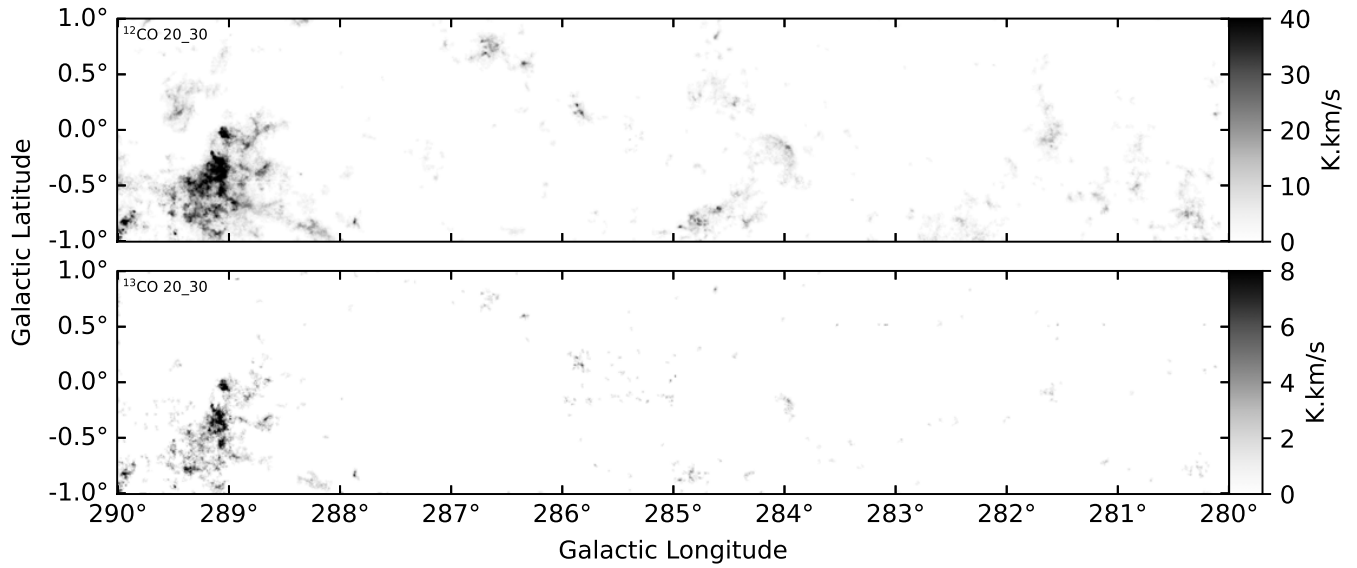

**Figure 61.** Moment 0 image for  $l=280-290^\circ$  calculated over the velocity interval  $v=20$  to  $30 \text{ km s}^{-1}$  using the main beam intensity,  $T_{MB}$ . The grayscale  $^{12}\text{CO}$  runs from 0 to 40 K.km/s, while the  $^{13}\text{CO}$  from 0 to 8 K.km/s.

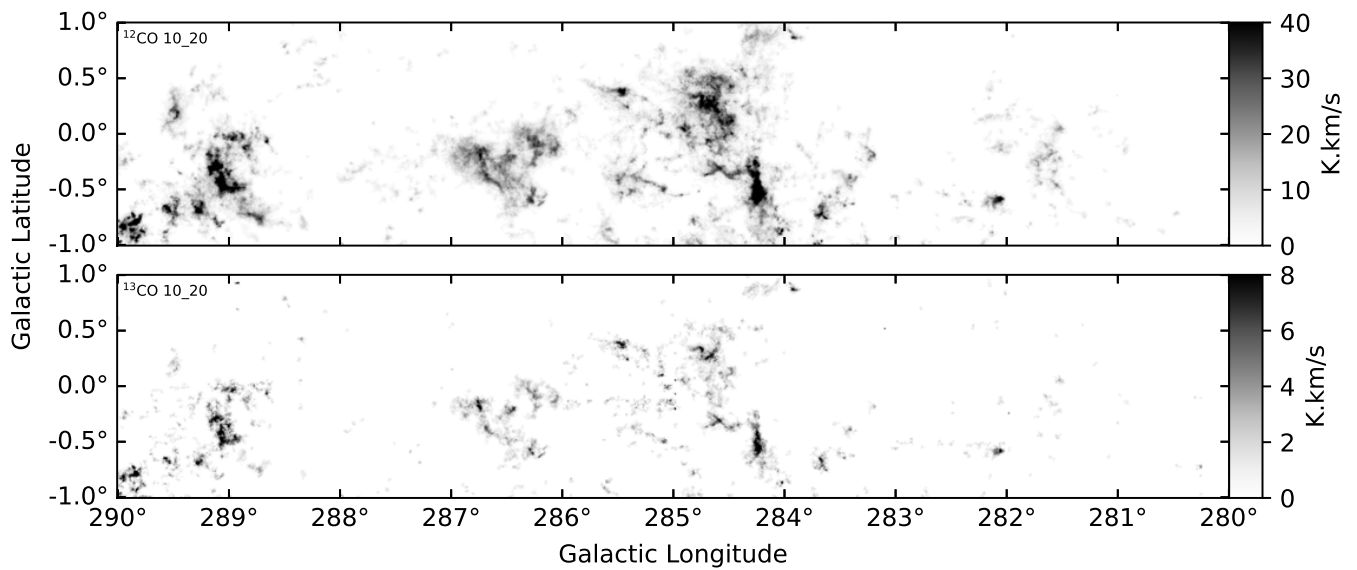

**Figure 62.** Moment 0 image for  $l=280-290^\circ$  calculated over the velocity interval  $v=10$  to  $20 \text{ km s}^{-1}$  using the main beam intensity,  $T_{MB}$ . The grayscale  $^{12}\text{CO}$  runs from 0 to 40 K.km/s, while the  $^{13}\text{CO}$  from 0 to 8 K.km/s.

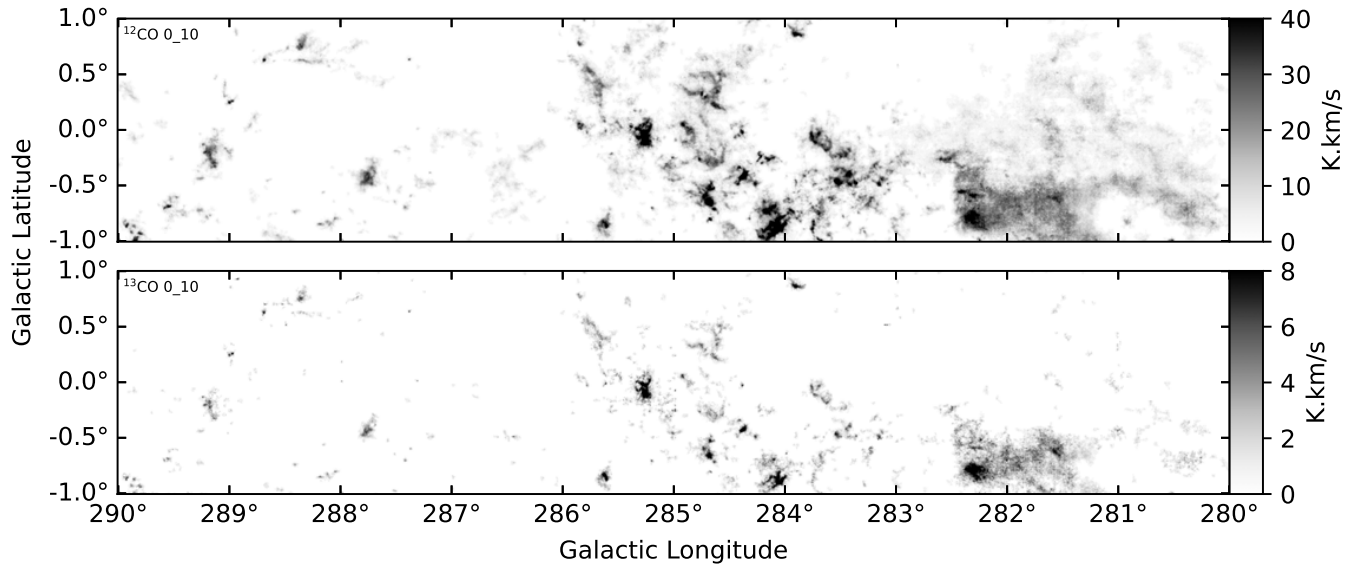

**Figure 63.** Moment 0 image for  $l=280-290^\circ$  calculated over the velocity interval  $v=0$  to  $10 \text{ km s}^{-1}$  using the main beam intensity,  $T_{MB}$ . The grayscale  $^{12}\text{CO}$  runs from 0 to 40 K.km/s, while the  $^{13}\text{CO}$  from 0 to 8 K.km/s.

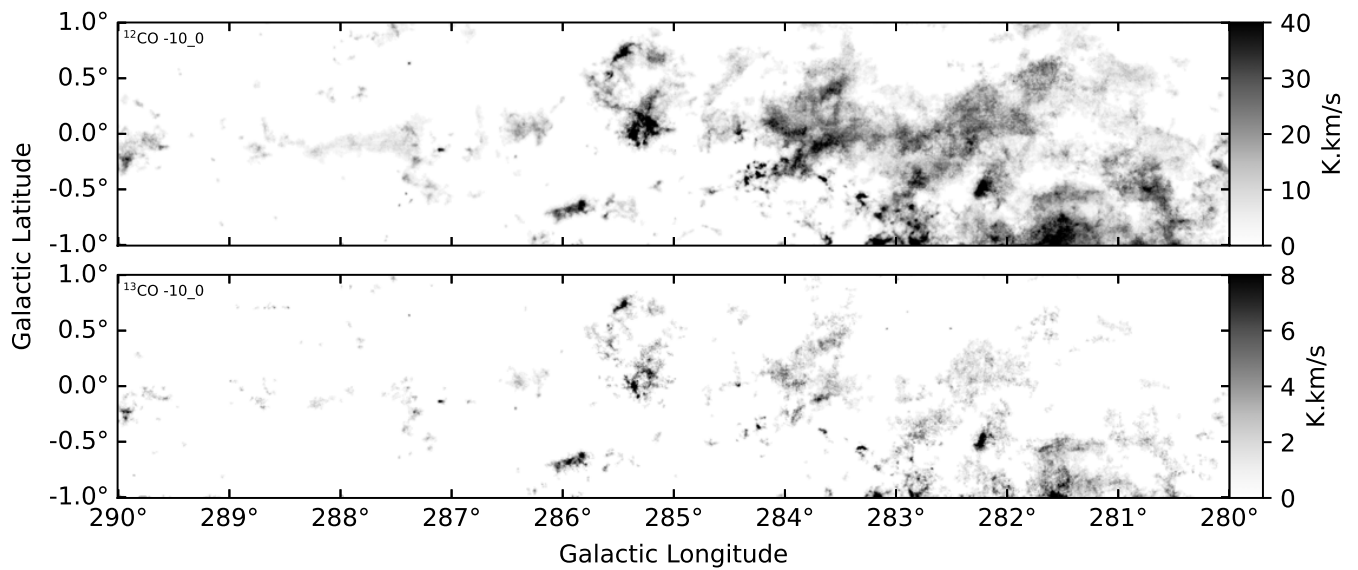

**Figure 64.** Moment 0 image for  $l=280-290^\circ$  calculated over the velocity interval  $v=-10$  to  $0 \text{ km s}^{-1}$  using the main beam intensity,  $T_{MB}$ . The grayscale  $^{12}\text{CO}$  runs from 0 to 40 K.km/s, while the  $^{13}\text{CO}$  from 0 to 8 K.km/s.

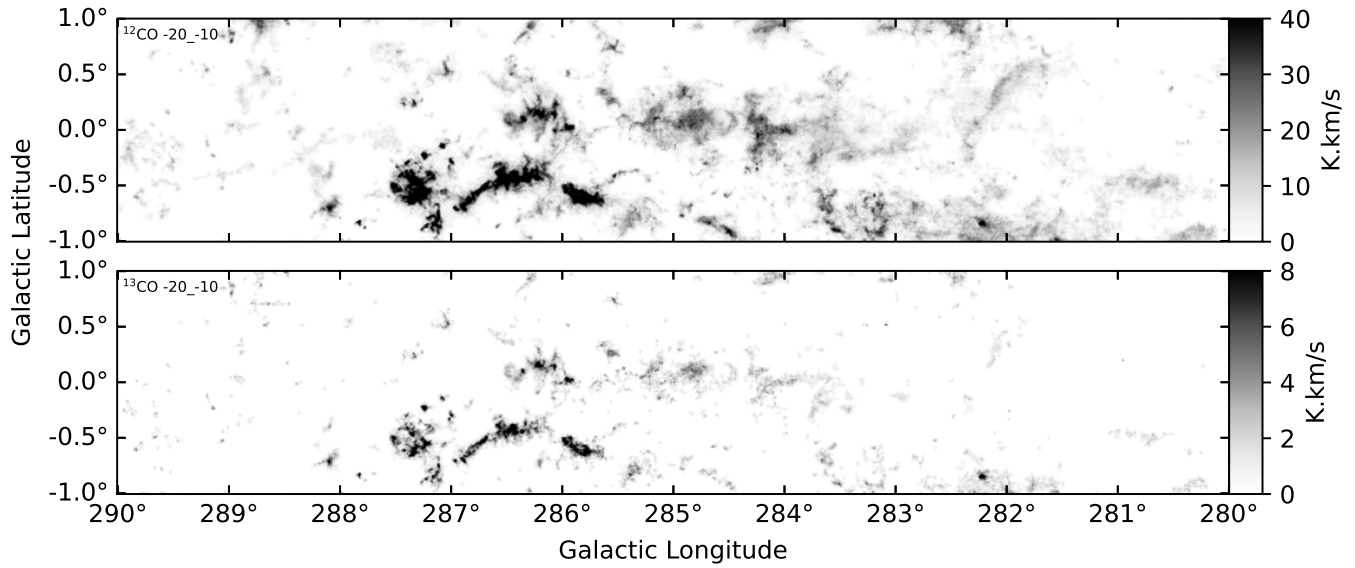

**Figure 65.** Moment 0 image for  $l=280-290^\circ$  calculated over the velocity interval  $v=-20$  to  $-10 \text{ km s}^{-1}$  using the main beam intensity,  $T_{MB}$ . The grayscale  $^{12}\text{CO}$  runs from 0 to 40 K.km/s, while the  $^{13}\text{CO}$  from 0 to 8 K.km/s.

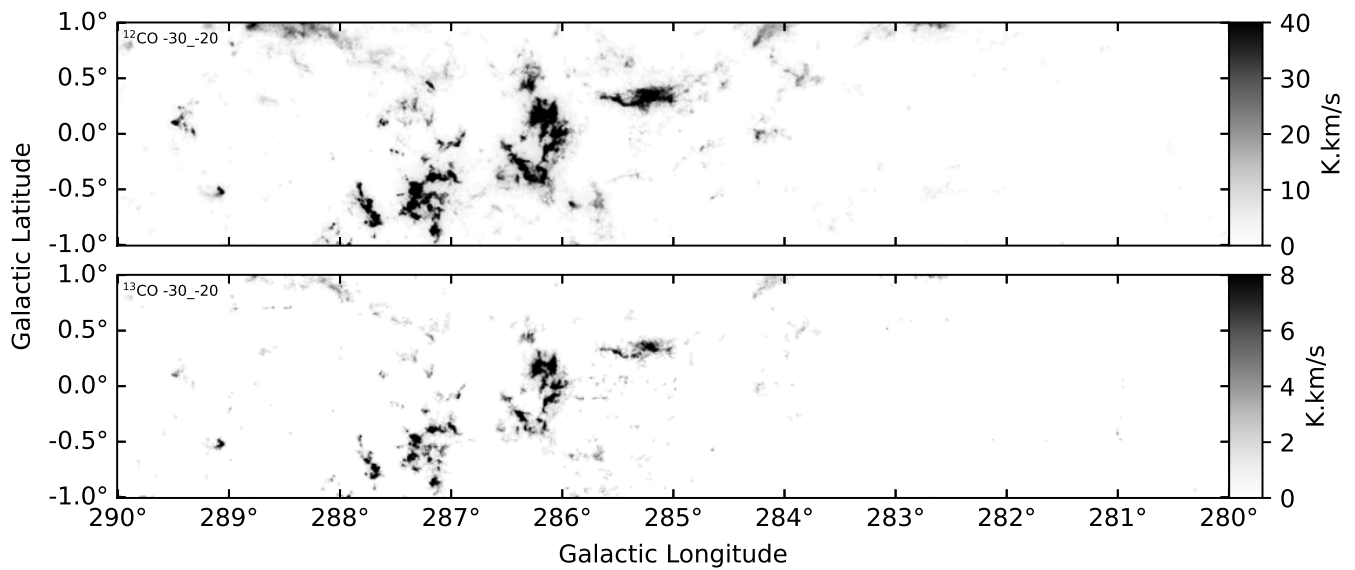

**Figure 66.** Moment 0 image for  $l=280-290^\circ$  calculated over the velocity interval  $v=-30$  to  $-20 \text{ km s}^{-1}$  using the main beam intensity,  $T_{MB}$ . The grayscale  $^{12}\text{CO}$  runs from 0 to 40 K.km/s, while the  $^{13}\text{CO}$  from 0 to 8 K.km/s.

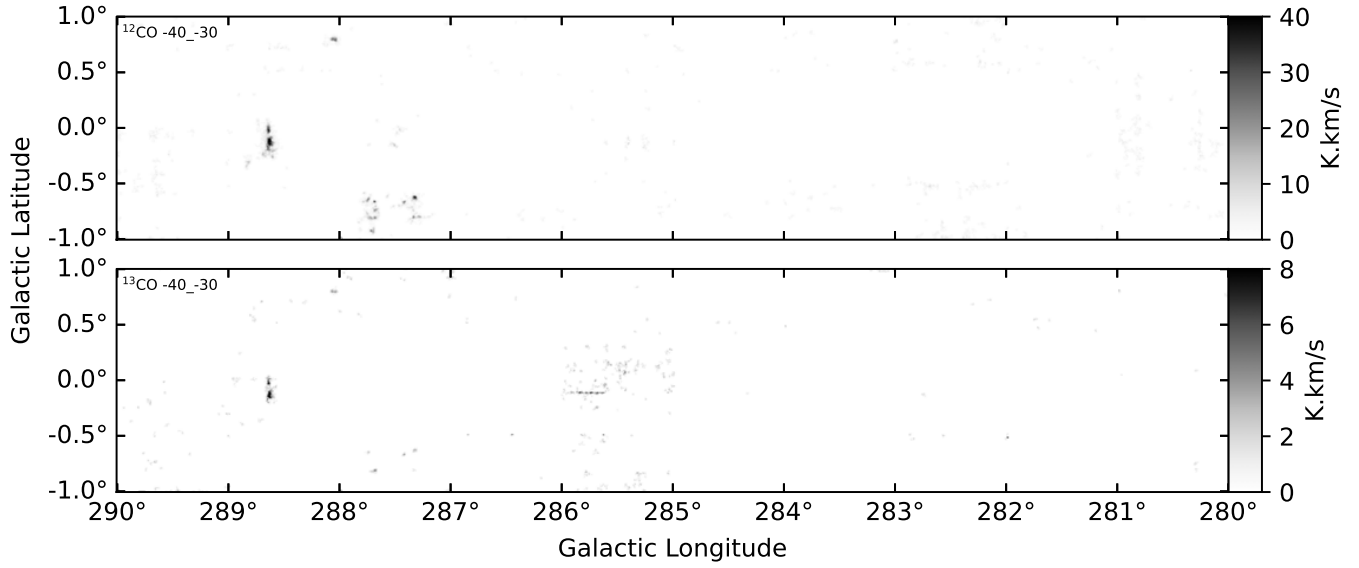

**Figure 67.** Moment 0 image for  $l=280\text{-}290^\circ$  calculated over the velocity interval  $v=-40$  to  $-30\text{ km s}^{-1}$  using the main beam intensity,  $T_{MB}$ . The grayscale  $^{12}\text{CO}$  runs from 0 to 40 K.km/s, while the  $^{13}\text{CO}$  from 0 to 8 K.km/s.

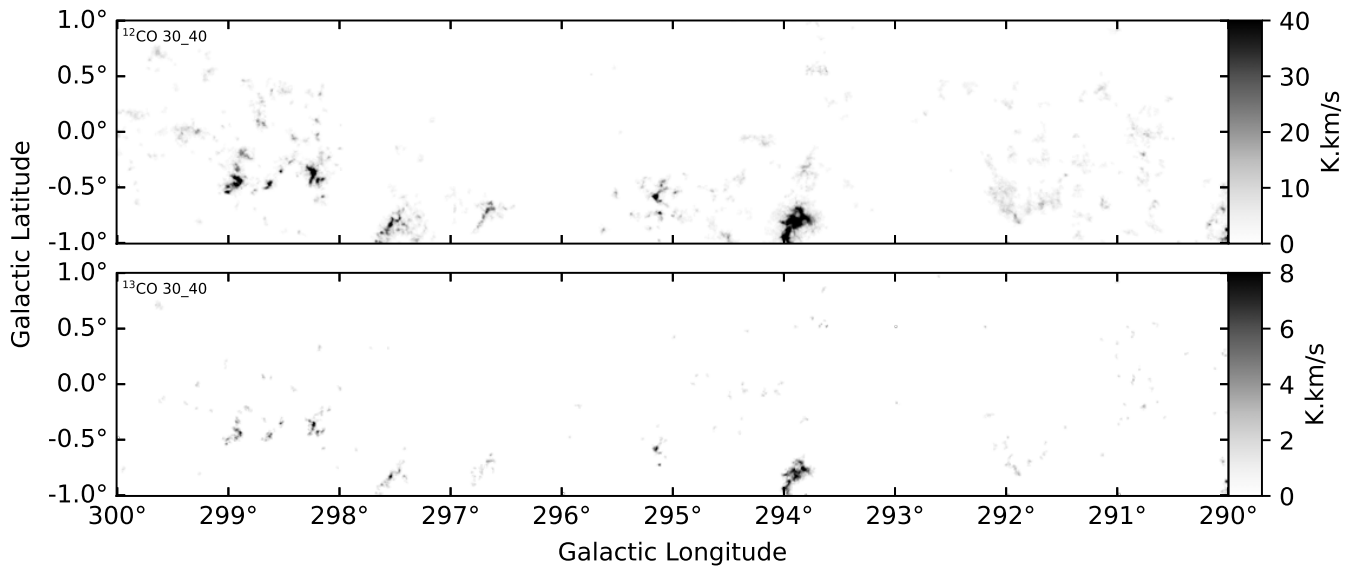

**Figure 68.** Moment 0 image for  $l=290\text{-}300^\circ$  calculated over the velocity interval  $v=30$  to  $40\text{ km s}^{-1}$  using the main beam intensity,  $T_{MB}$ . The grayscale  $^{12}\text{CO}$  runs from 0 to 40 K.km/s, while the  $^{13}\text{CO}$  from 0 to 8 K.km/s.



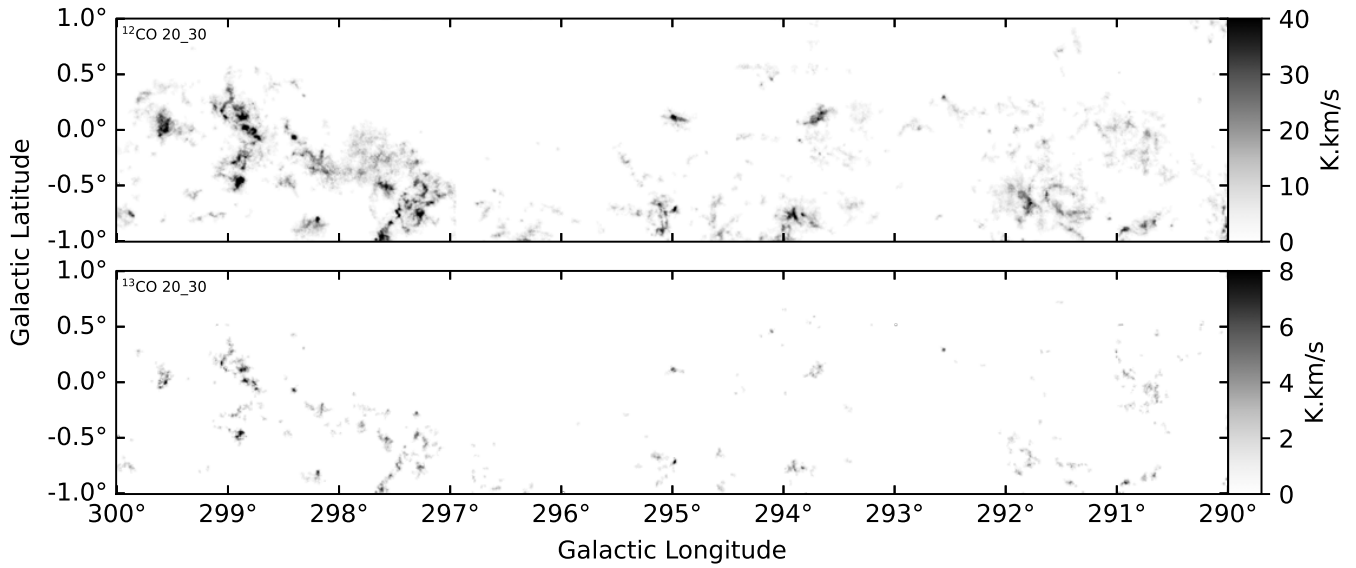

**Figure 69.** Moment 0 image for  $l=290\text{--}300^\circ$  calculated over the velocity interval  $v=20$  to  $30 \text{ km s}^{-1}$  using the main beam intensity,  $T_{MB}$ . The grayscale  $^{12}\text{CO}$  runs from 0 to 40 K.km/s, while the  $^{13}\text{CO}$  from 0 to 8 K.km/s.

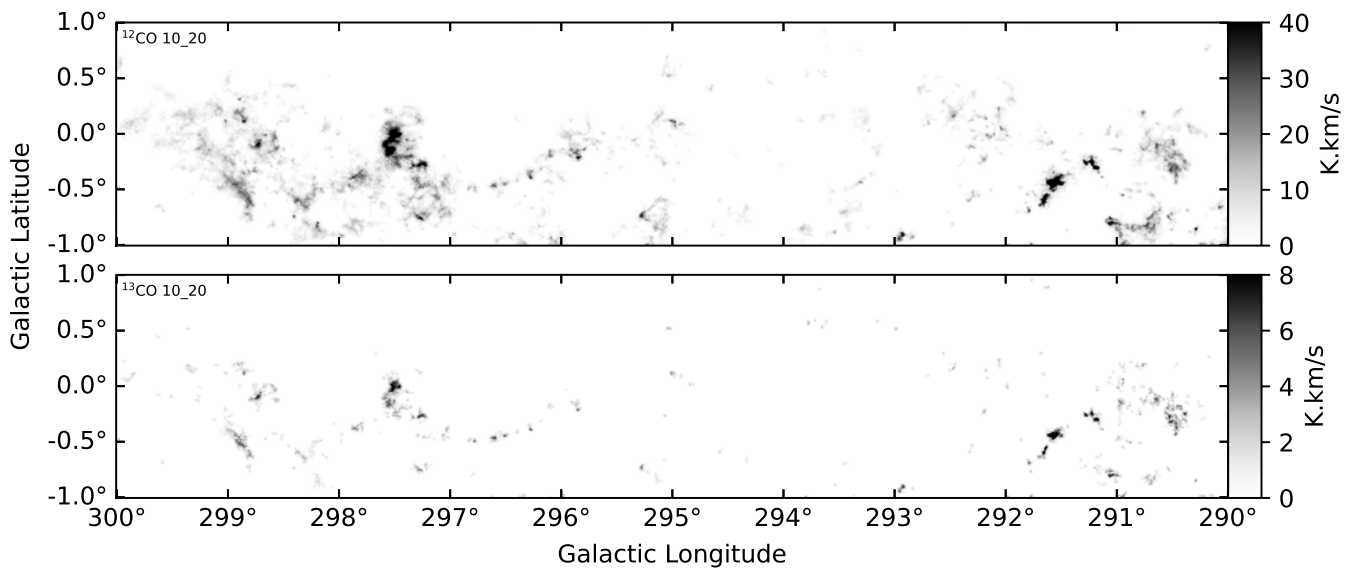

**Figure 70.** Moment 0 image for  $l=290\text{--}300^\circ$  calculated over the velocity interval  $v=10$  to  $20 \text{ km s}^{-1}$  using the main beam intensity,  $T_{MB}$ . The grayscale  $^{12}\text{CO}$  runs from 0 to 40 K.km/s, while the  $^{13}\text{CO}$  from 0 to 8 K.km/s.

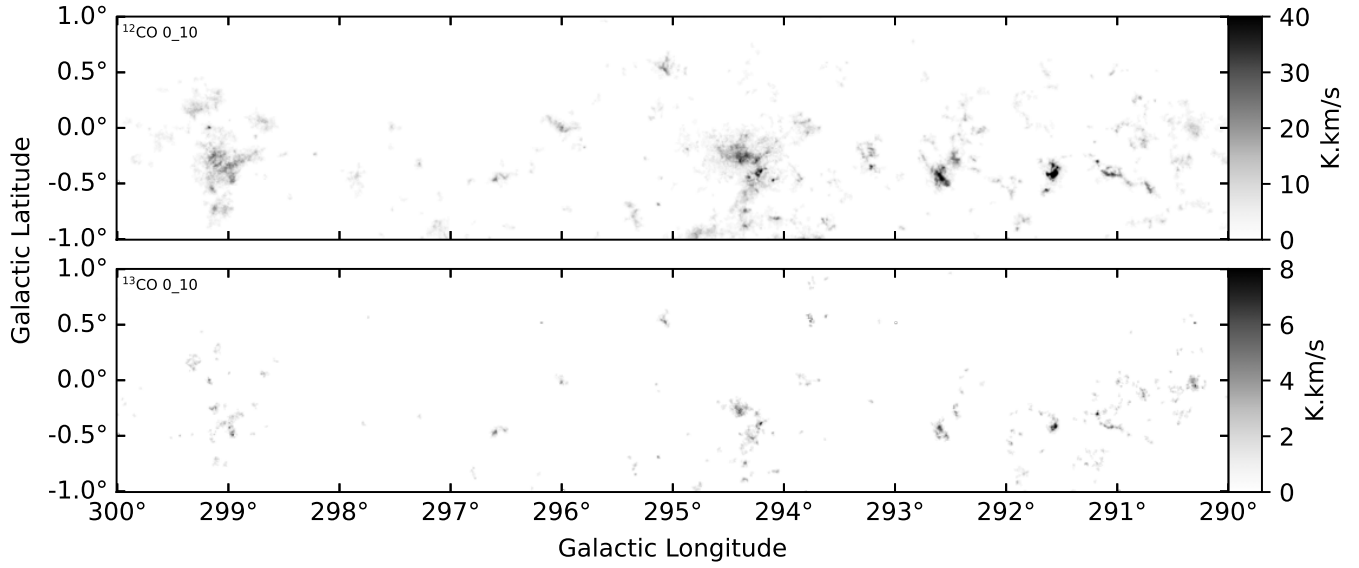

**Figure 71.** Moment 0 image for  $l=290-300^\circ$  calculated over the velocity interval  $v=0$  to  $10 \text{ km s}^{-1}$  using the main beam intensity,  $T_{MB}$ . The grayscale  $^{12}\text{CO}$  runs from 0 to 40 K.km/s, while the  $^{13}\text{CO}$  from 0 to 8 K.km/s.

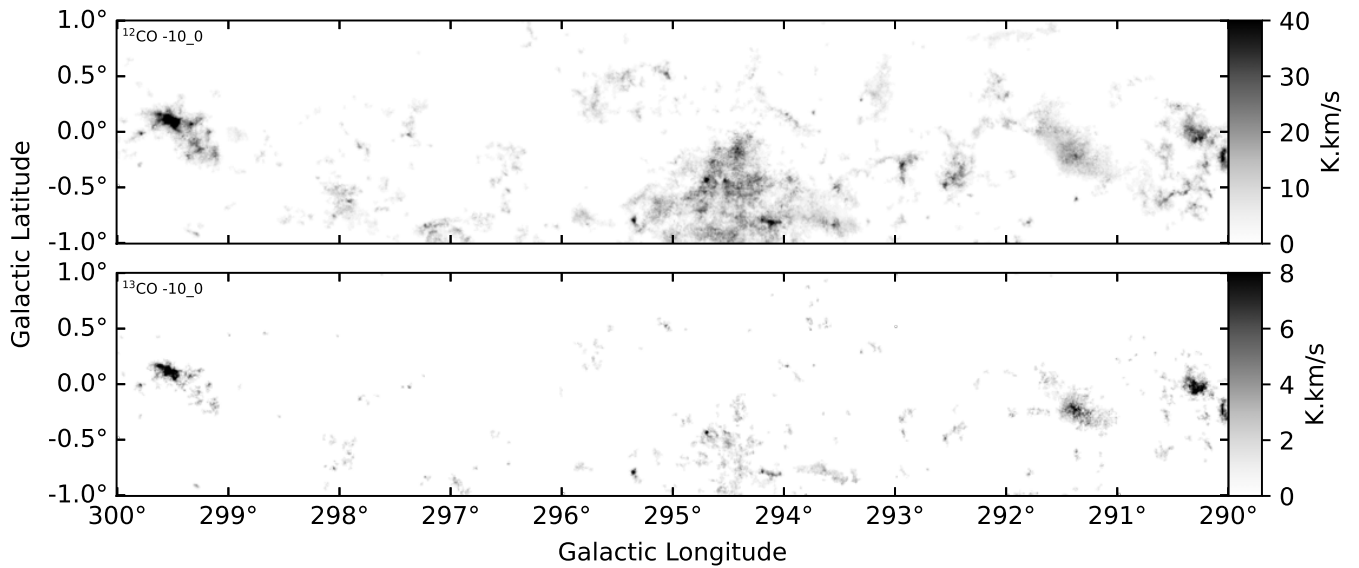

**Figure 72.** Moment 0 image for  $l=290-300^\circ$  calculated over the velocity interval  $v=-10$  to  $0 \text{ km s}^{-1}$  using the main beam intensity,  $T_{MB}$ . The grayscale  $^{12}\text{CO}$  runs from 0 to 40 K.km/s, while the  $^{13}\text{CO}$  from 0 to 8 K.km/s.

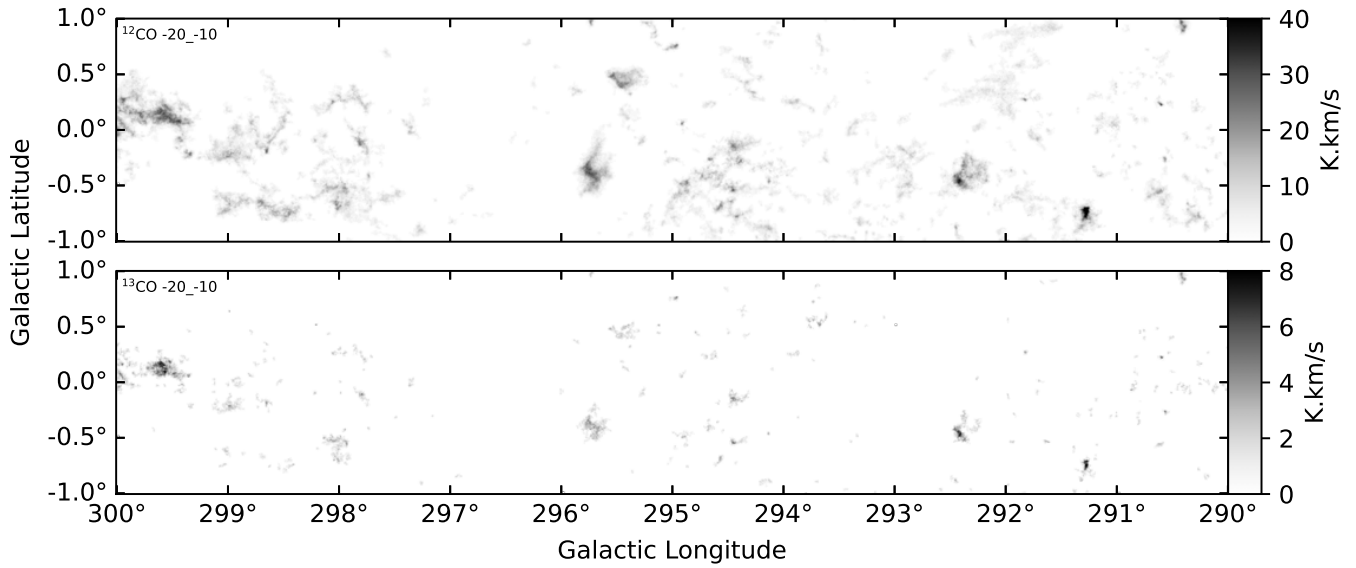

**Figure 73.** Moment 0 image for  $l=290\text{--}300^\circ$  calculated over the velocity interval  $v=-20$  to  $-10\text{ km s}^{-1}$  using the main beam intensity,  $T_{MB}$ . The grayscale  $^{12}\text{CO}$  runs from 0 to 40 K.km/s, while the  $^{13}\text{CO}$  from 0 to 8 K.km/s.

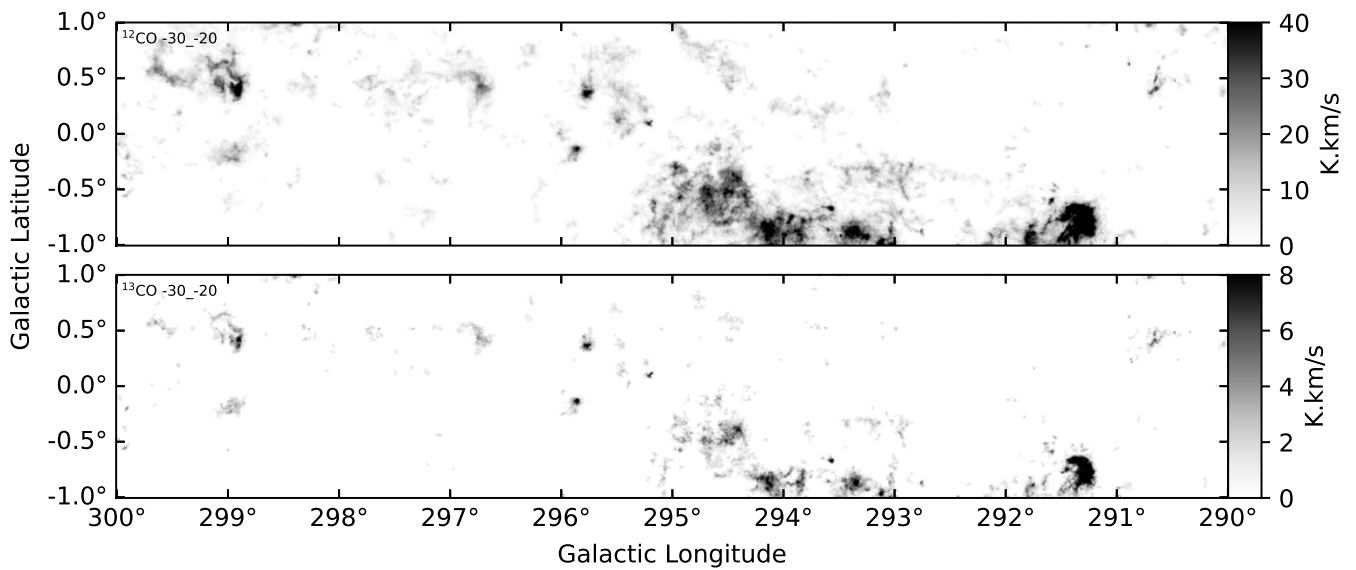

**Figure 74.** Moment 0 image for  $l=290\text{--}300^\circ$  calculated over the velocity interval  $v=-30$  to  $-20\text{ km s}^{-1}$  using the main beam intensity,  $T_{MB}$ . The grayscale  $^{12}\text{CO}$  runs from 0 to 40 K.km/s, while the  $^{13}\text{CO}$  from 0 to 8 K.km/s.

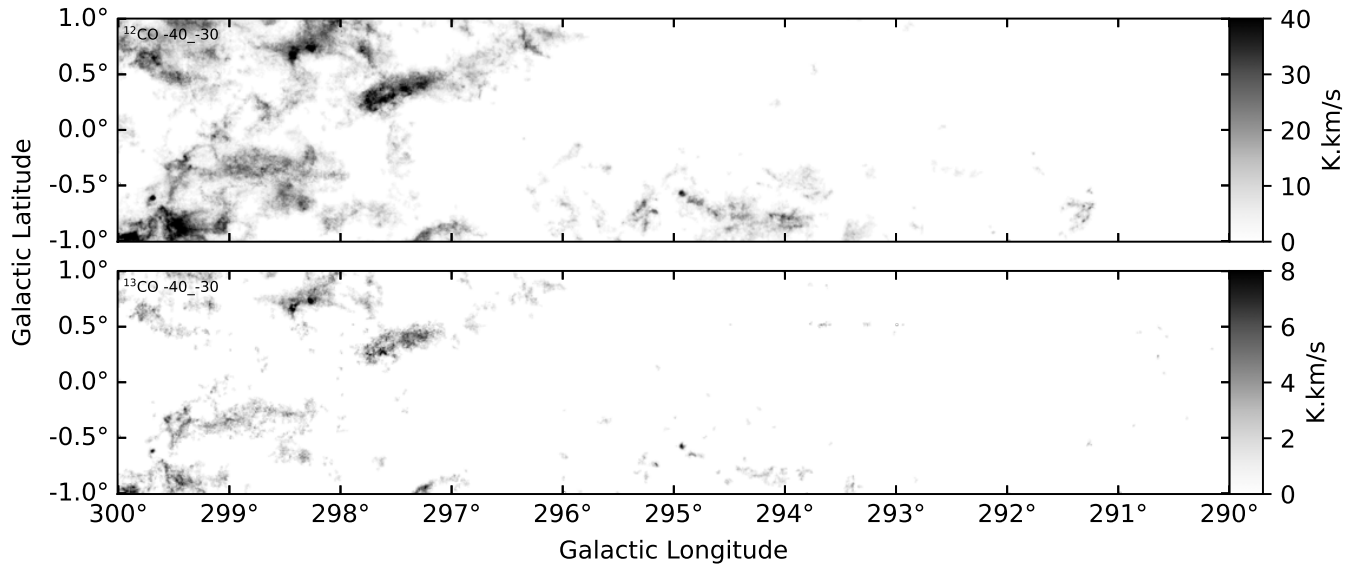

**Figure 75.** Moment 0 image for  $l=290\text{-}300^\circ$  calculated over the velocity interval  $v=-40$  to  $-30 \text{ km s}^{-1}$  using the main beam intensity,  $T_{MB}$ . The grayscale  $^{12}\text{CO}$  runs from 0 to 40  $\text{K.km/s}$ , while the  $^{13}\text{CO}$  from 0 to 8  $\text{K.km/s}$ .

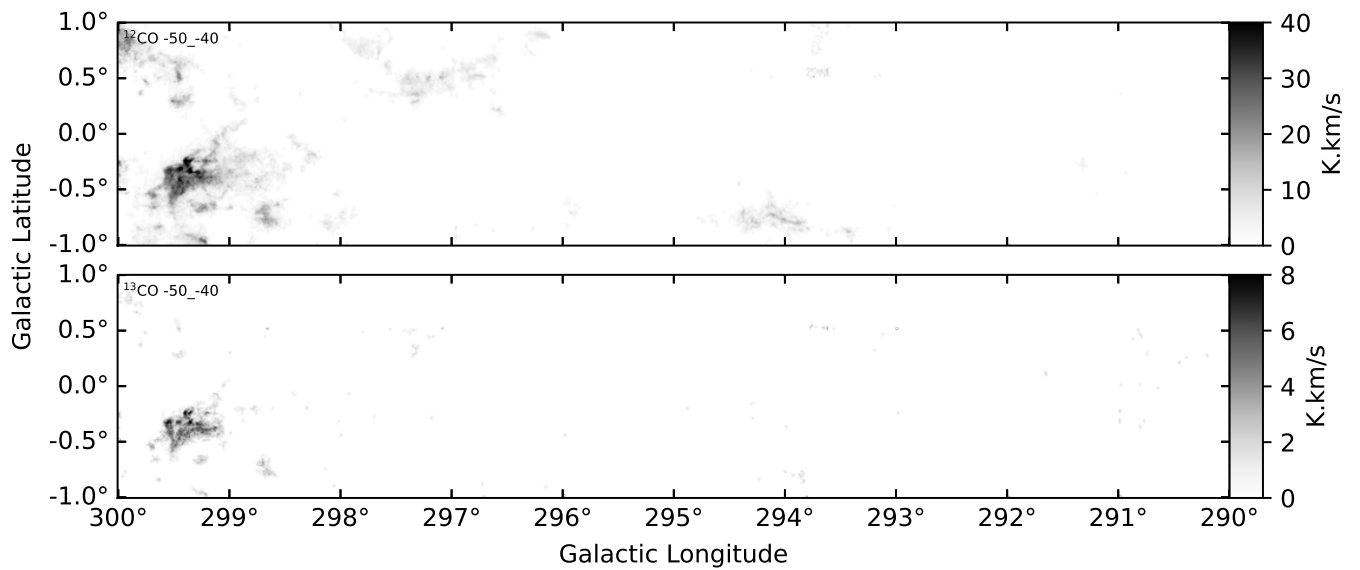

**Figure 76.** Moment 0 image for  $l=290\text{-}300^\circ$  calculated over the velocity interval  $v=-50$  to  $-40 \text{ km s}^{-1}$  using the main beam intensity,  $T_{MB}$ . The grayscale  $^{12}\text{CO}$  runs from 0 to 40  $\text{K.km/s}$ , while the  $^{13}\text{CO}$  from 0 to 8  $\text{K.km/s}$ .

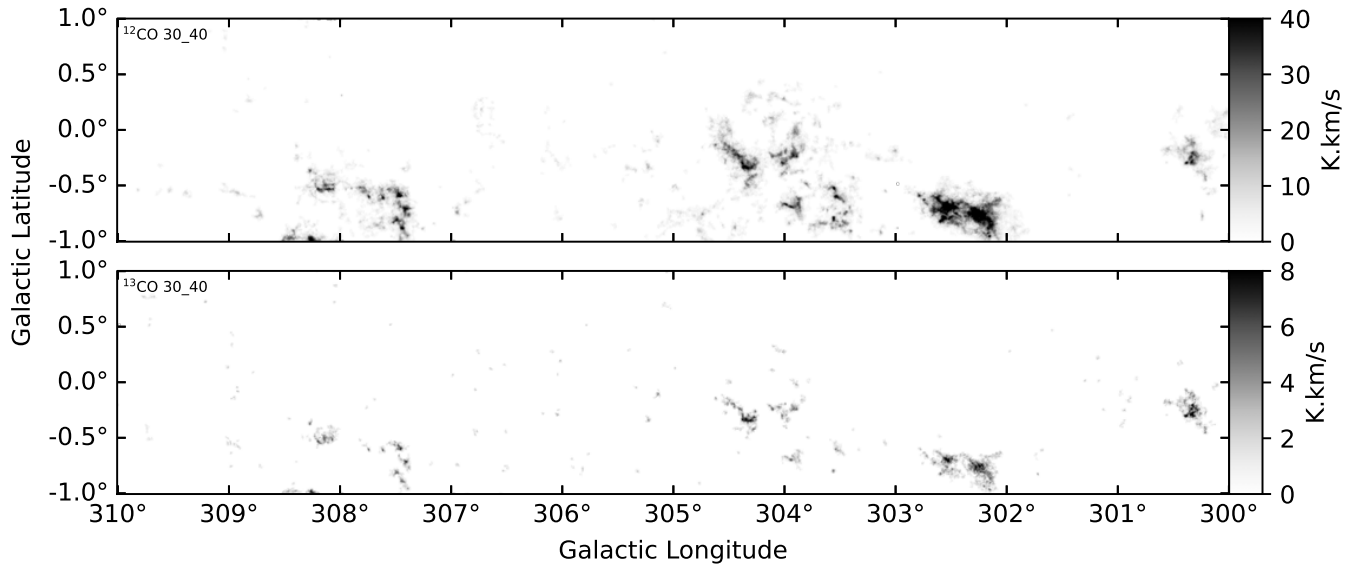

**Figure 77.** Moment 0 image for  $l=300\text{-}310^\circ$  calculated over the velocity interval  $v=30$  to  $40\text{ km s}^{-1}$  using the main beam intensity,  $T_{MB}$ . The grayscale  $^{12}\text{CO}$  runs from 0 to 40 K.km/s, while the  $^{13}\text{CO}$  from 0 to 8 K.km/s.

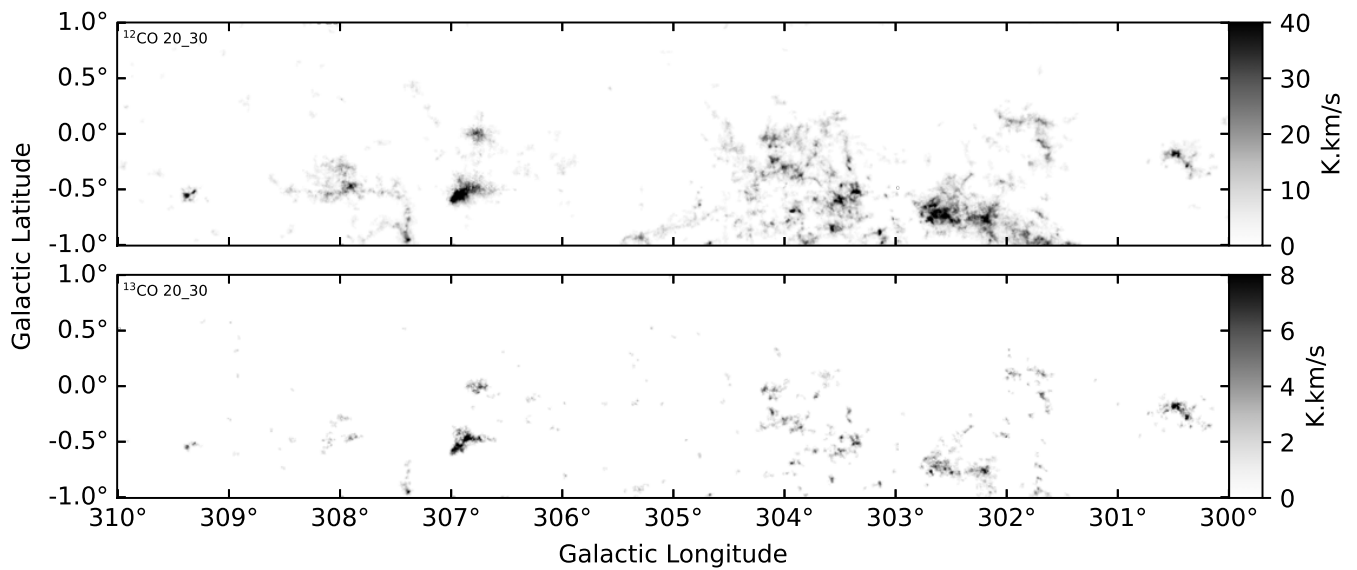

**Figure 78.** Moment 0 image for  $l=300\text{-}310^\circ$  calculated over the velocity interval  $v=20$  to  $30\text{ km s}^{-1}$  using the main beam intensity,  $T_{MB}$ . The grayscale  $^{12}\text{CO}$  runs from 0 to 40 K.km/s, while the  $^{13}\text{CO}$  from 0 to 8 K.km/s.

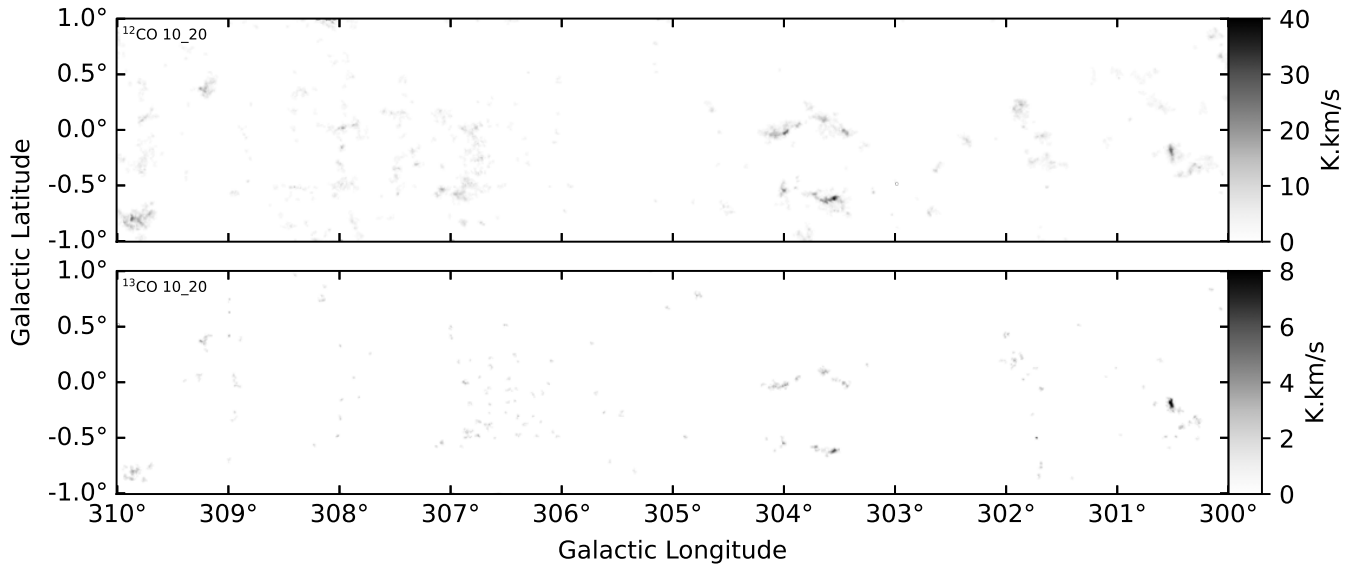

**Figure 79.** Moment 0 image for  $l=300\text{-}310^\circ$  calculated over the velocity interval  $v=10$  to  $20 \text{ km s}^{-1}$  using the main beam intensity,  $T_{MB}$ . The grayscale  $^{12}\text{CO}$  runs from 0 to 40 K.km/s, while the  $^{13}\text{CO}$  from 0 to 8 K.km/s.

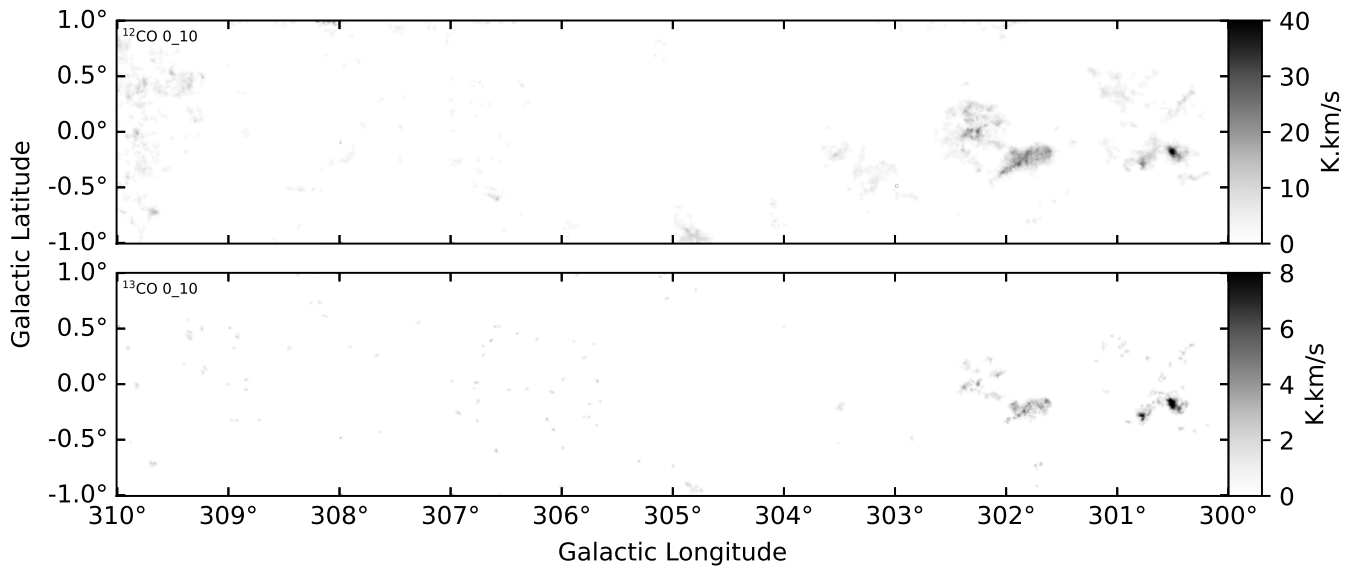

**Figure 80.** Moment 0 image for  $l=300\text{-}310^\circ$  calculated over the velocity interval  $v=0$  to  $10 \text{ km s}^{-1}$  using the main beam intensity,  $T_{MB}$ . The grayscale  $^{12}\text{CO}$  runs from 0 to 40 K.km/s, while the  $^{13}\text{CO}$  from 0 to 8 K.km/s.

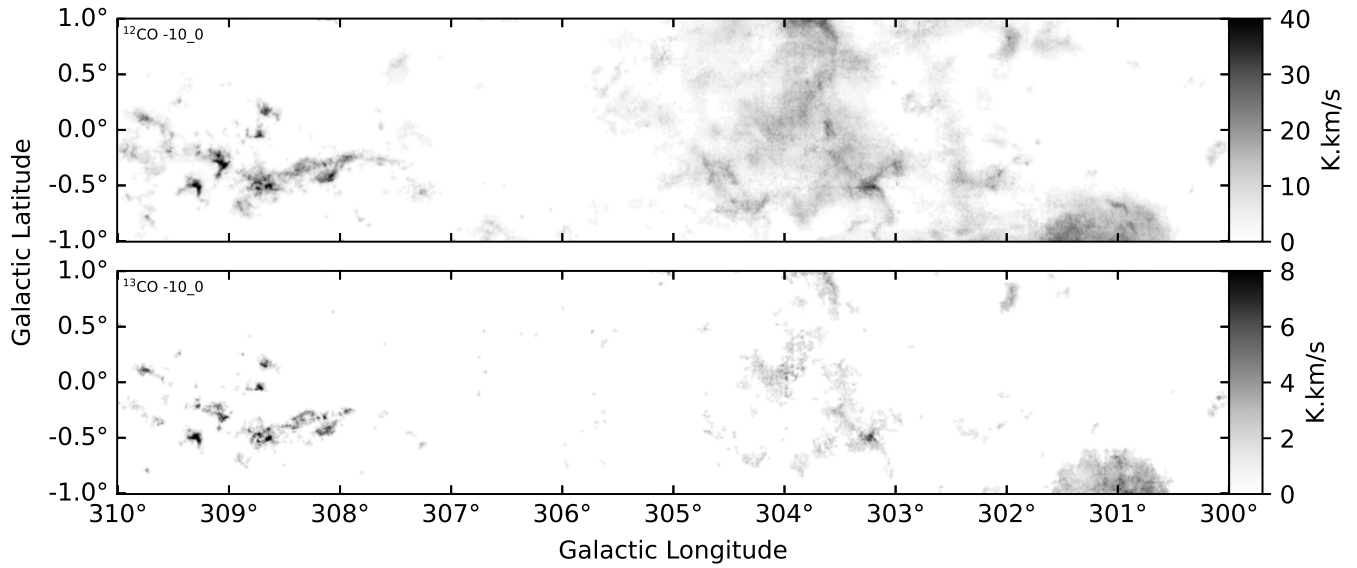

**Figure 81.** Moment 0 image for  $l=300-310^\circ$  calculated over the velocity interval  $v=-10$  to  $0 \text{ km s}^{-1}$  using the main beam intensity,  $T_{MB}$ . The grayscale  $^{12}\text{CO}$  runs from 0 to 40 K.km/s, while the  $^{13}\text{CO}$  from 0 to 8 K.km/s.

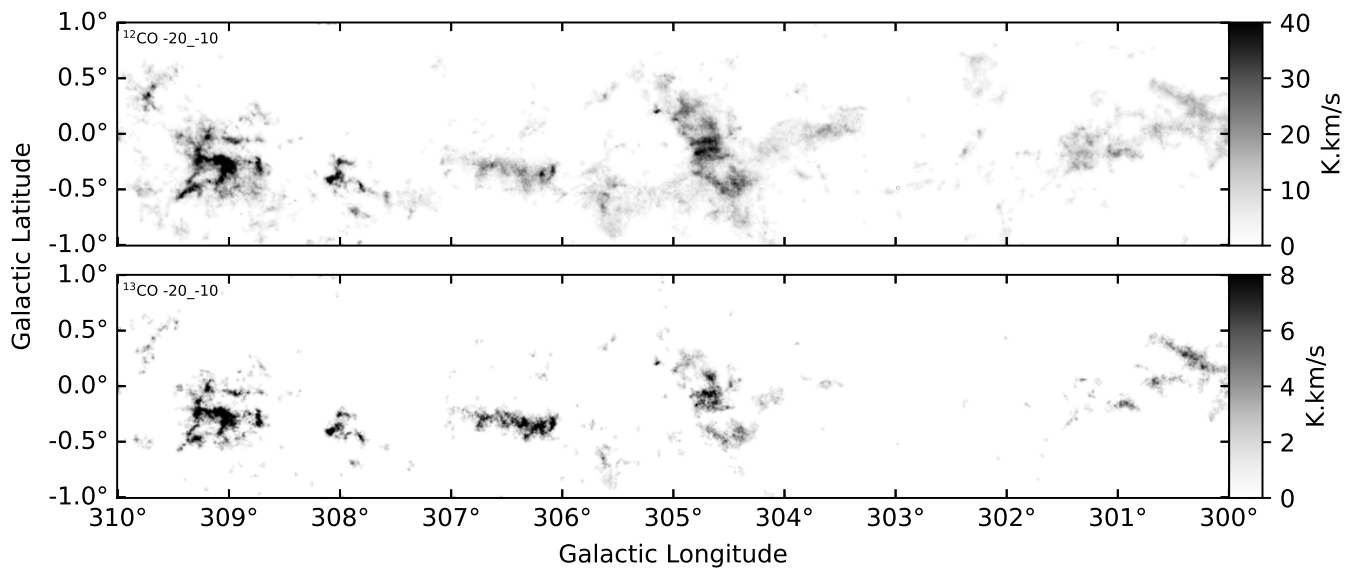

**Figure 82.** Moment 0 image for  $l=300-310^\circ$  calculated over the velocity interval  $v=-20$  to  $-10 \text{ km s}^{-1}$  using the main beam intensity,  $T_{MB}$ . The grayscale  $^{12}\text{CO}$  runs from 0 to 40 K.km/s, while the  $^{13}\text{CO}$  from 0 to 8 K.km/s.

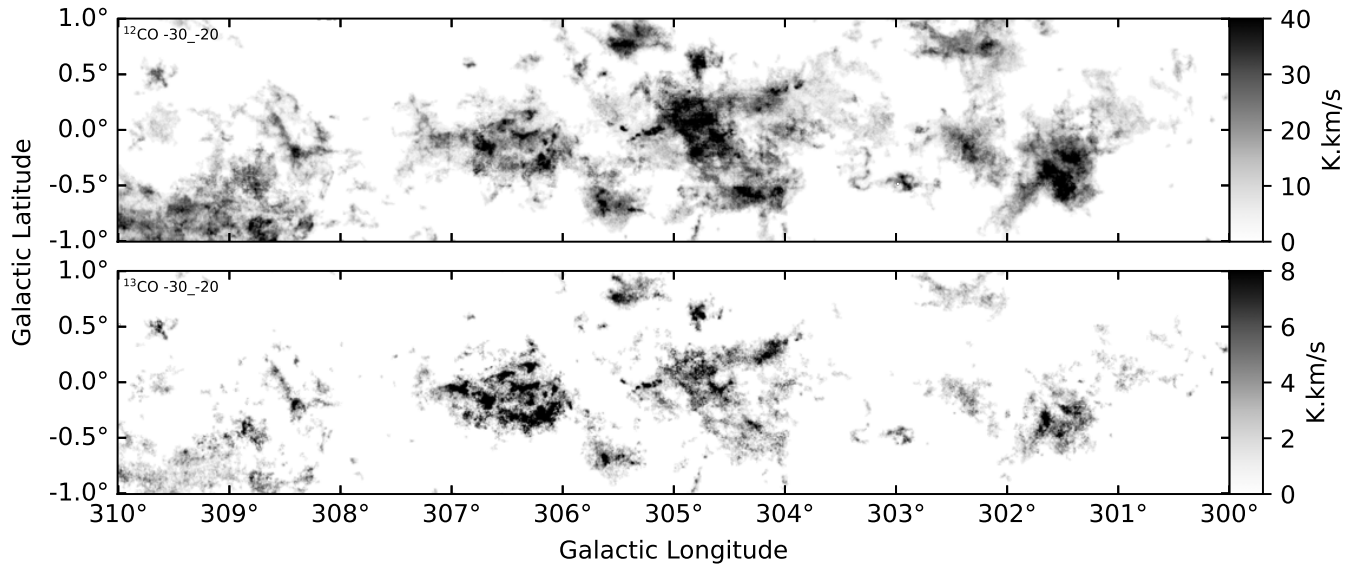

**Figure 83.** Moment 0 image for  $l=300-310^\circ$  calculated over the velocity interval  $v=-30$  to  $-20$  km  $s^{-1}$  using the main beam intensity,  $T_{MB}$ . The grayscale  $^{12}\text{CO}$  runs from 0 to 40 K.km/s, while the  $^{13}\text{CO}$  from 0 to 8 K.km/s.

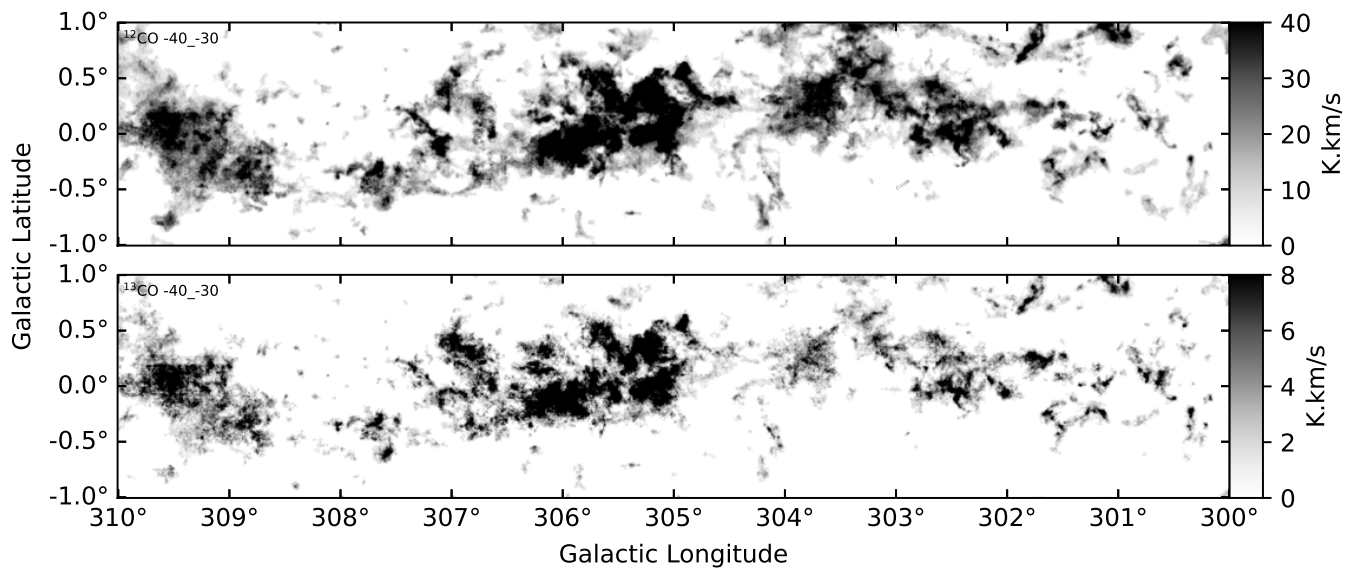

**Figure 84.** Moment 0 image for  $l=300-310^\circ$  calculated over the velocity interval  $v=-40$  to  $-30$  km  $s^{-1}$  using the main beam intensity,  $T_{MB}$ . The grayscale  $^{12}\text{CO}$  runs from 0 to 40 K.km/s, while the  $^{13}\text{CO}$  from 0 to 8 K.km/s.



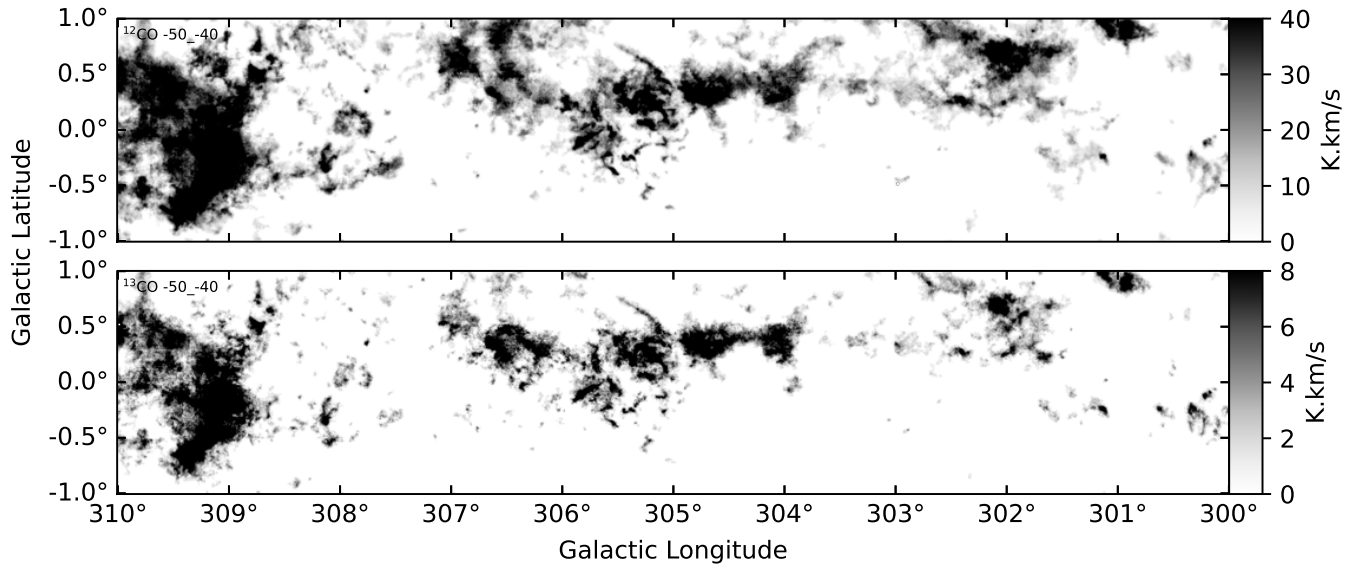

**Figure 85.** Moment 0 image for  $l=300\text{-}310^\circ$  calculated over the velocity interval  $v=-50$  to  $-40$   $\text{km s}^{-1}$  using the main beam intensity,  $T_{MB}$ . The grayscale  $^{12}\text{CO}$  runs from 0 to 40  $\text{K.km/s}$ , while the  $^{13}\text{CO}$  from 0 to 8  $\text{K.km/s}$ .

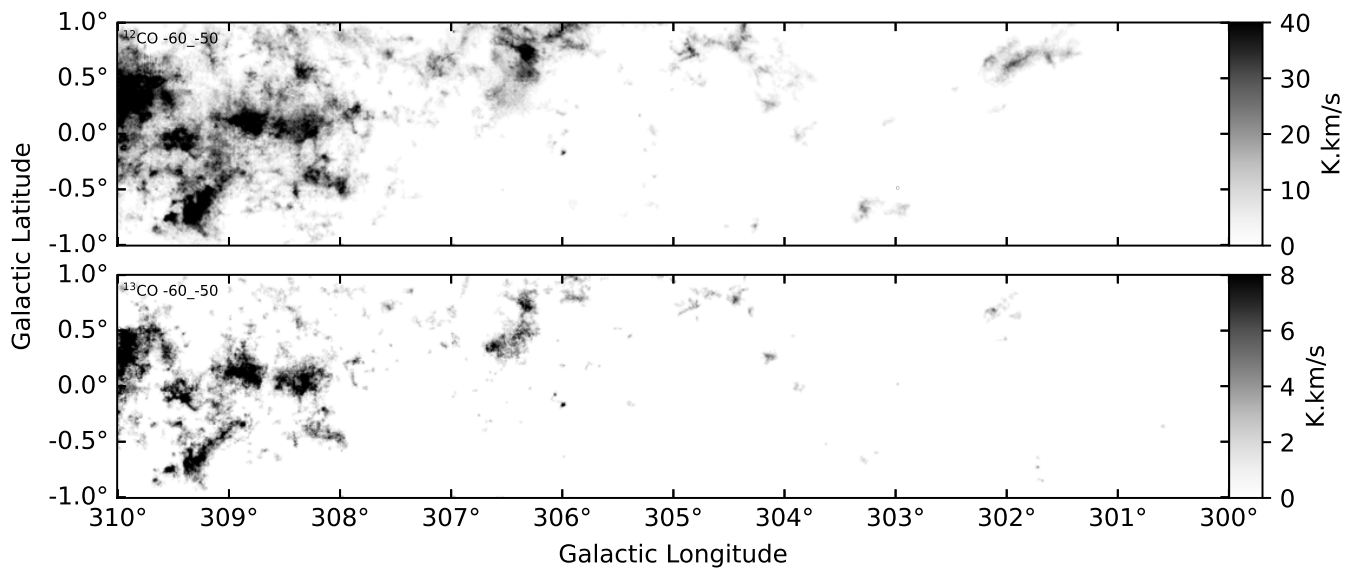

**Figure 86.** Moment 0 image for  $l=300\text{-}310^\circ$  calculated over the velocity interval  $v=-60$  to  $-50$   $\text{km s}^{-1}$  using the main beam intensity,  $T_{MB}$ . The grayscale  $^{12}\text{CO}$  runs from 0 to 40  $\text{K.km/s}$ , while the  $^{13}\text{CO}$  from 0 to 8  $\text{K.km/s}$ .

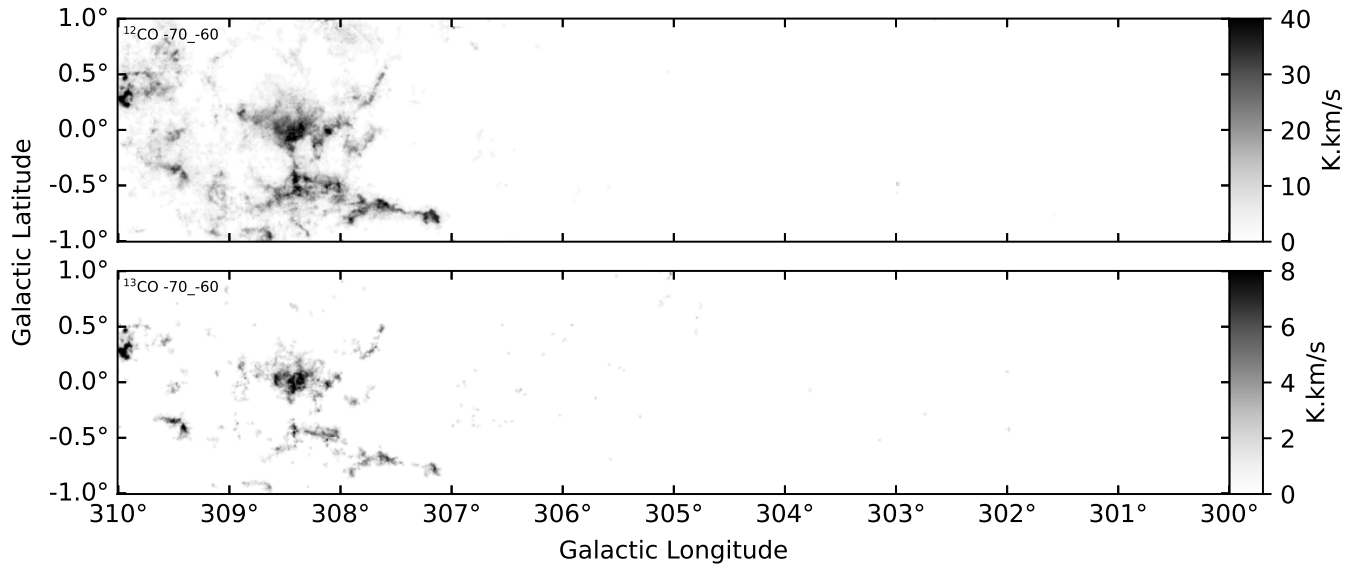

**Figure 87.** Moment 0 image for  $l=300-310^\circ$  calculated over the velocity interval  $v=-70$  to  $-60 \text{ km s}^{-1}$  using the main beam intensity,  $T_{MB}$ . The grayscale  $^{12}\text{CO}$  runs from 0 to 40 K.km/s, while the  $^{13}\text{CO}$  from 0 to 8 K.km/s.

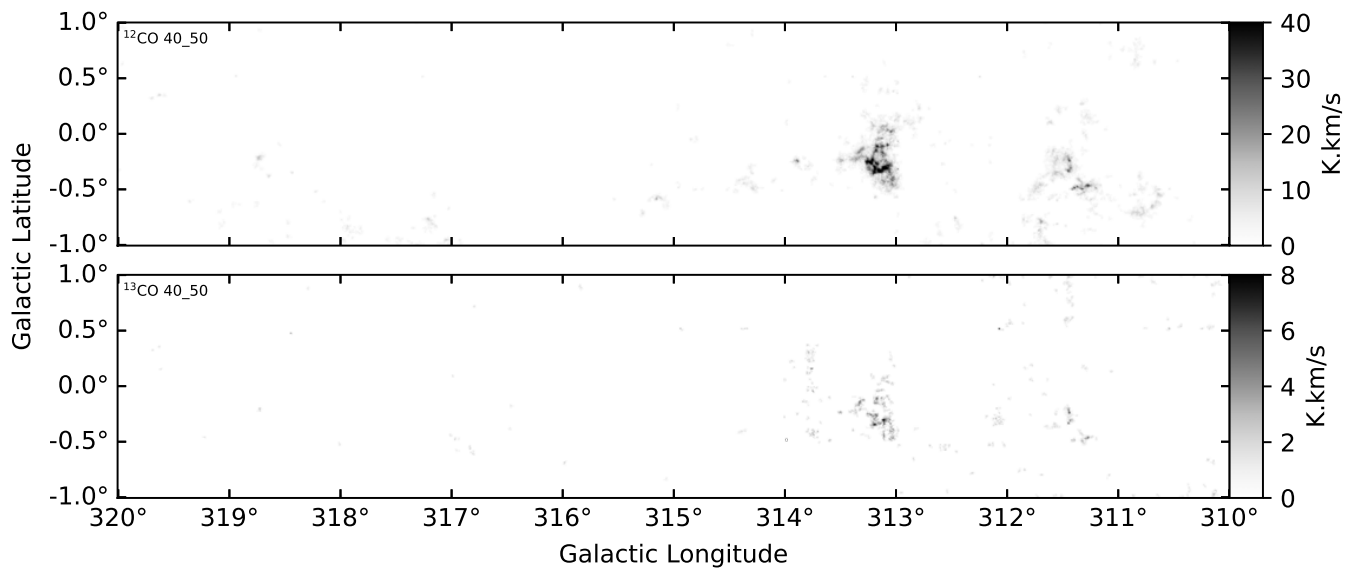

**Figure 88.** Moment 0 image for  $l=310-320^\circ$  calculated over the velocity interval  $v=40$  to  $50 \text{ km s}^{-1}$  using the main beam intensity,  $T_{MB}$ . The grayscale  $^{12}\text{CO}$  runs from 0 to 40 K.km/s, while the  $^{13}\text{CO}$  from 0 to 8 K.km/s.

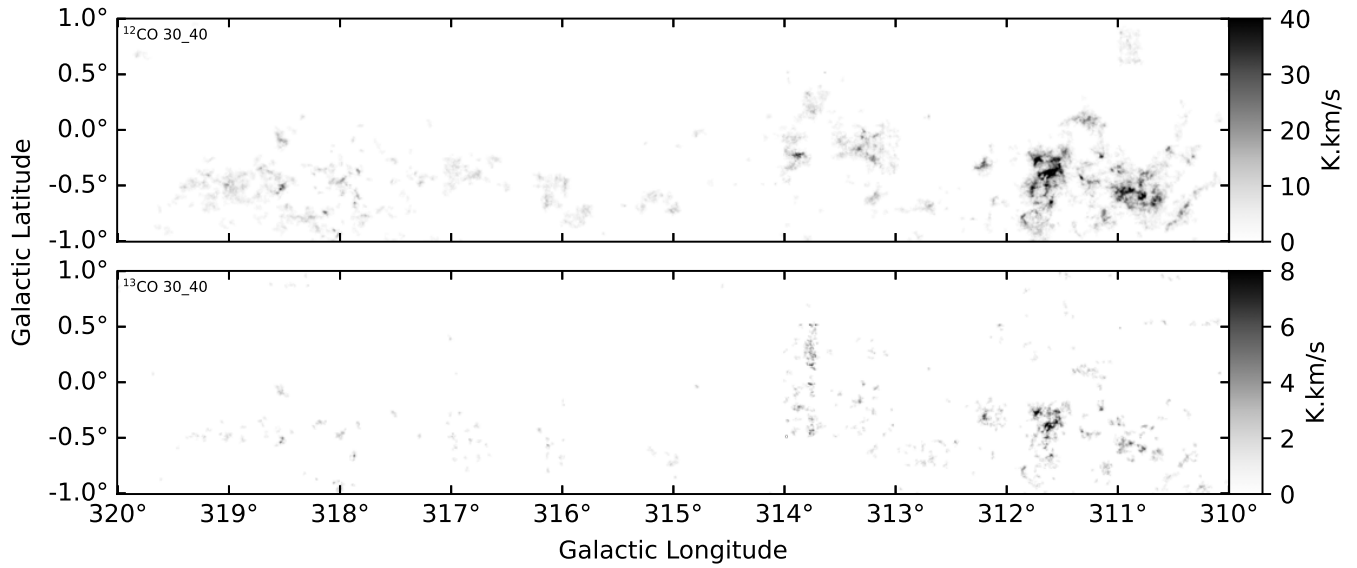

**Figure 89.** Moment 0 image for  $l=310\text{--}320^\circ$  calculated over the velocity interval  $v=30$  to  $40\text{ km s}^{-1}$  using the main beam intensity,  $T_{MB}$ . The grayscale  $^{12}\text{CO}$  runs from 0 to 40 K.km/s, while the  $^{13}\text{CO}$  from 0 to 8 K.km/s.

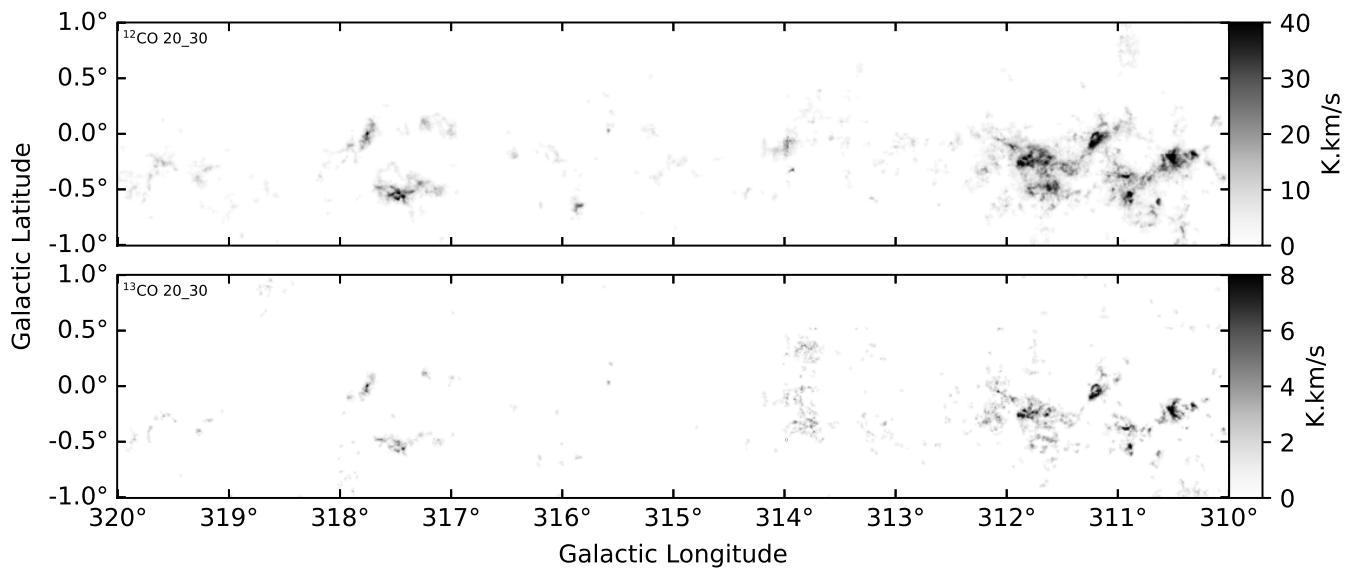

**Figure 90.** Moment 0 image for  $l=310\text{--}320^\circ$  calculated over the velocity interval  $v=20$  to  $30\text{ km s}^{-1}$  using the main beam intensity,  $T_{MB}$ . The grayscale  $^{12}\text{CO}$  runs from 0 to 40 K.km/s, while the  $^{13}\text{CO}$  from 0 to 8 K.km/s.

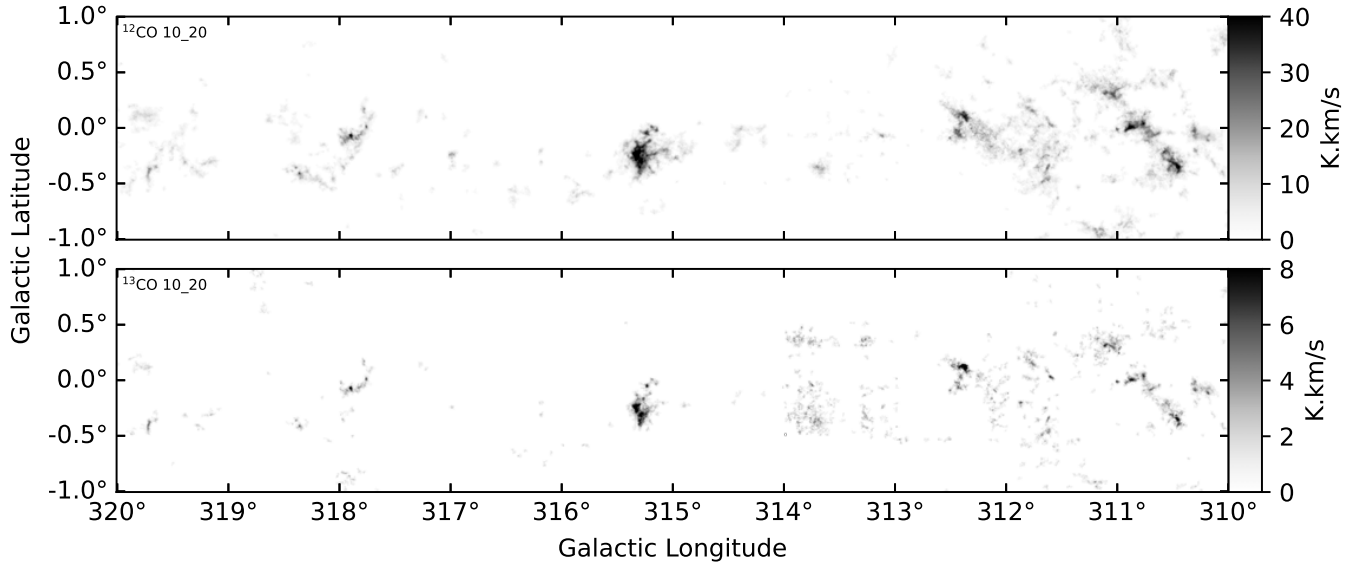

**Figure 91.** Moment 0 image for  $l=310\text{-}320^\circ$  calculated over the velocity interval  $v=10$  to  $20 \text{ km s}^{-1}$  using the main beam intensity,  $T_{MB}$ . The grayscale  $^{12}\text{CO}$  runs from 0 to 40 K.km/s, while the  $^{13}\text{CO}$  from 0 to 8 K.km/s.

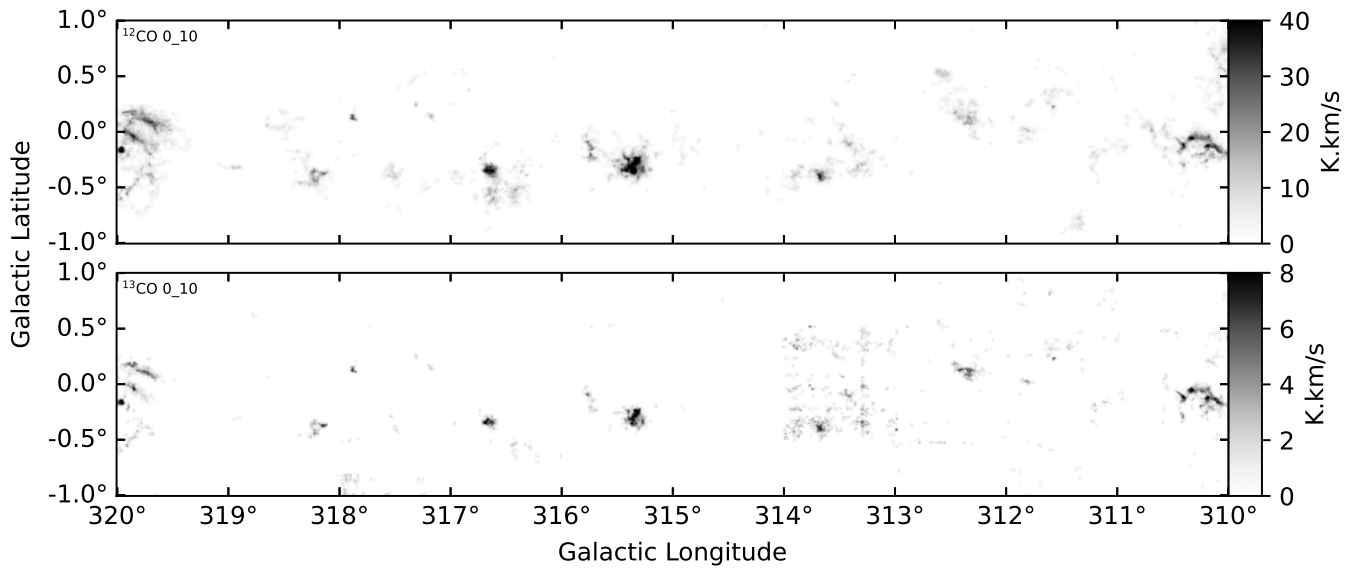

**Figure 92.** Moment 0 image for  $l=310\text{-}320^\circ$  calculated over the velocity interval  $v=0$  to  $10 \text{ km s}^{-1}$  using the main beam intensity,  $T_{MB}$ . The grayscale  $^{12}\text{CO}$  runs from 0 to 40 K.km/s, while the  $^{13}\text{CO}$  from 0 to 8 K.km/s.

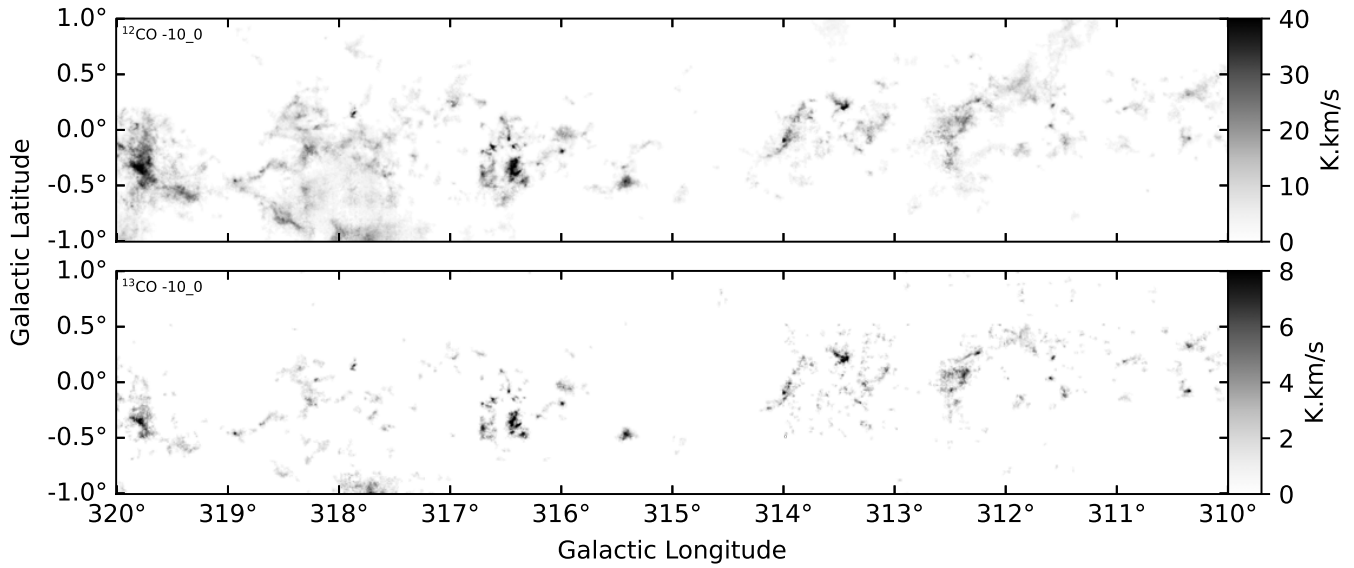

**Figure 93.** Moment 0 image for  $l=310-320^\circ$  calculated over the velocity interval  $v=-10$  to  $0 \text{ km s}^{-1}$  using the main beam intensity,  $T_{MB}$ . The grayscale  $^{12}\text{CO}$  runs from 0 to 40 K.km/s, while the  $^{13}\text{CO}$  from 0 to 8 K.km/s.

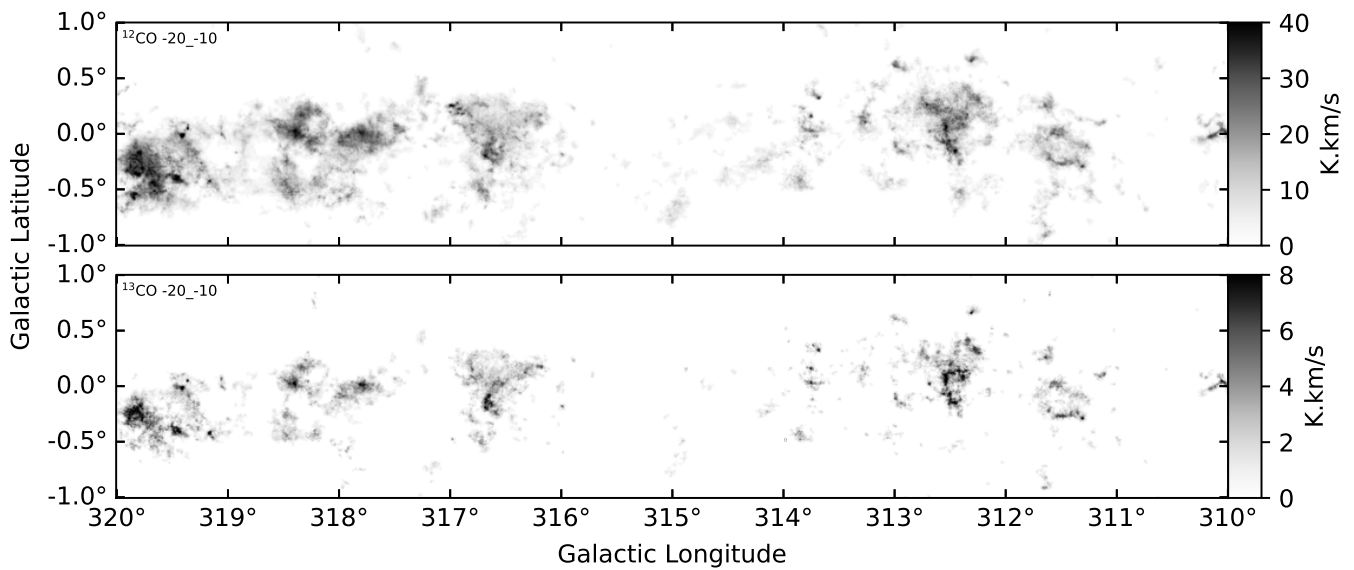

**Figure 94.** Moment 0 image for  $l=310-320^\circ$  calculated over the velocity interval  $v=-20$  to  $-10 \text{ km s}^{-1}$  using the main beam intensity,  $T_{MB}$ . The grayscale  $^{12}\text{CO}$  runs from 0 to 40 K.km/s, while the  $^{13}\text{CO}$  from 0 to 8 K.km/s.

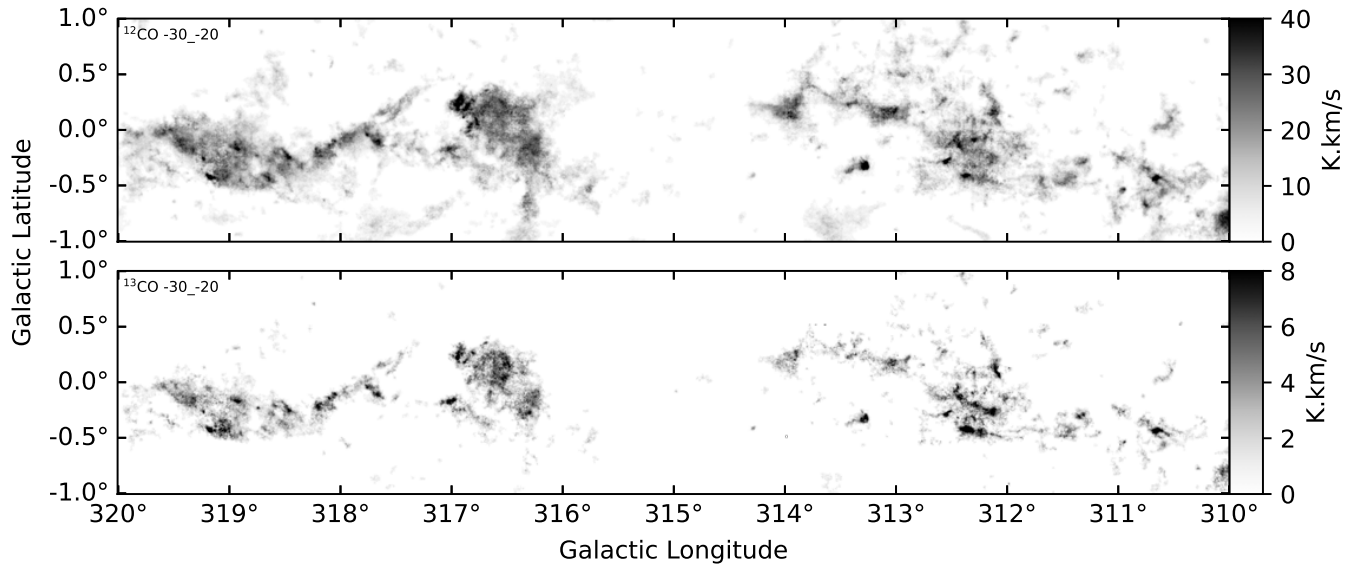

**Figure 95.** Moment 0 image for  $l=310-320^\circ$  calculated over the velocity interval  $v=-30$  to  $-20 \text{ km s}^{-1}$  using the main beam intensity,  $T_{MB}$ . The grayscale  $^{12}\text{CO}$  runs from 0 to 40 K.km/s, while the  $^{13}\text{CO}$  from 0 to 8 K.km/s.

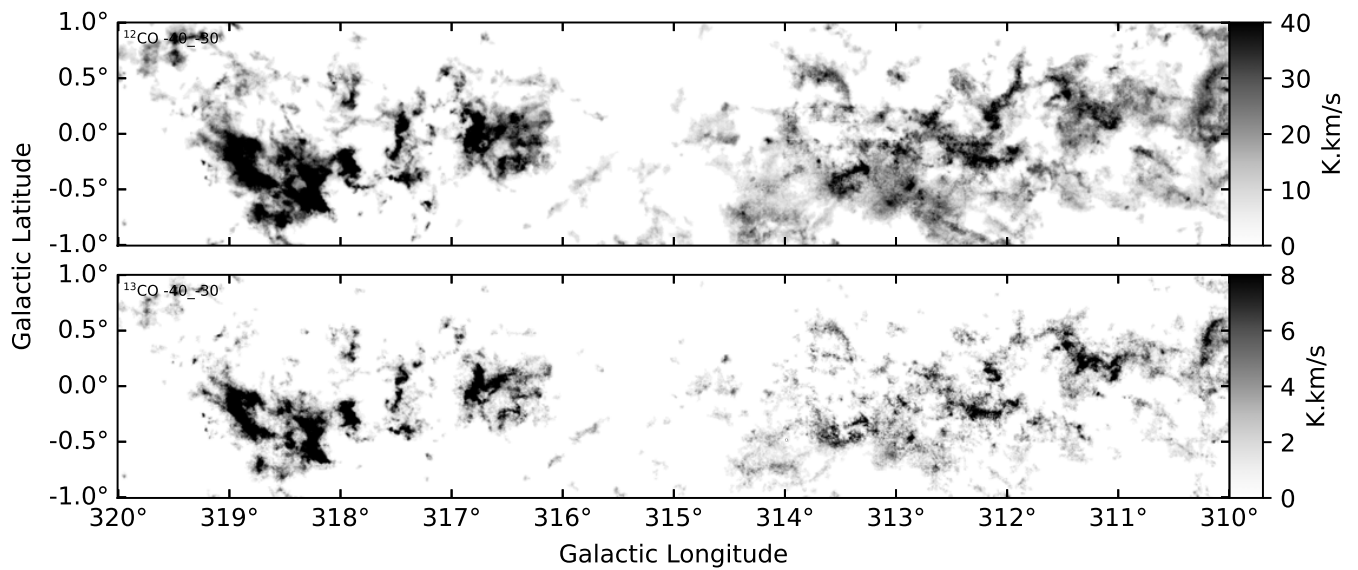

**Figure 96.** Moment 0 image for  $l=310-320^\circ$  calculated over the velocity interval  $v=-40$  to  $-30 \text{ km s}^{-1}$  using the main beam intensity,  $T_{MB}$ . The grayscale  $^{12}\text{CO}$  runs from 0 to 40 K.km/s, while the  $^{13}\text{CO}$  from 0 to 8 K.km/s.

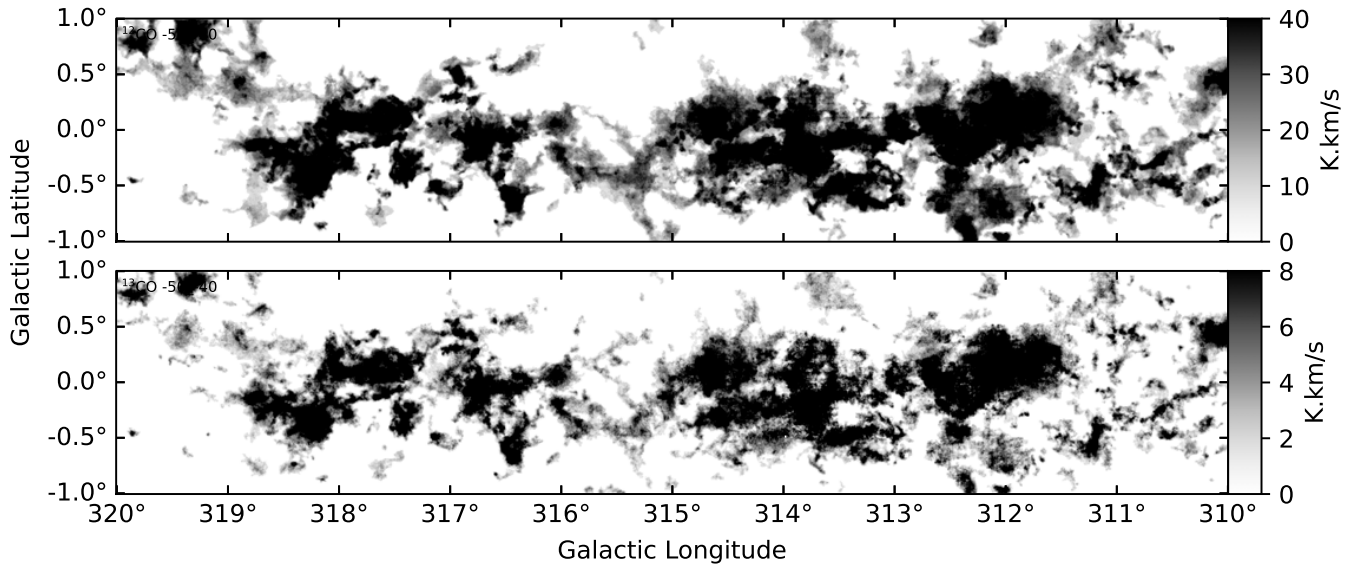

**Figure 97.** Moment 0 image for  $l=310\text{-}320^\circ$  calculated over the velocity interval  $v=-50$  to  $-40\text{ km s}^{-1}$  using the main beam intensity,  $T_{MB}$ . The grayscale  $^{12}\text{CO}$  runs from 0 to 40 K.km/s, while the  $^{13}\text{CO}$  from 0 to 8 K.km/s.

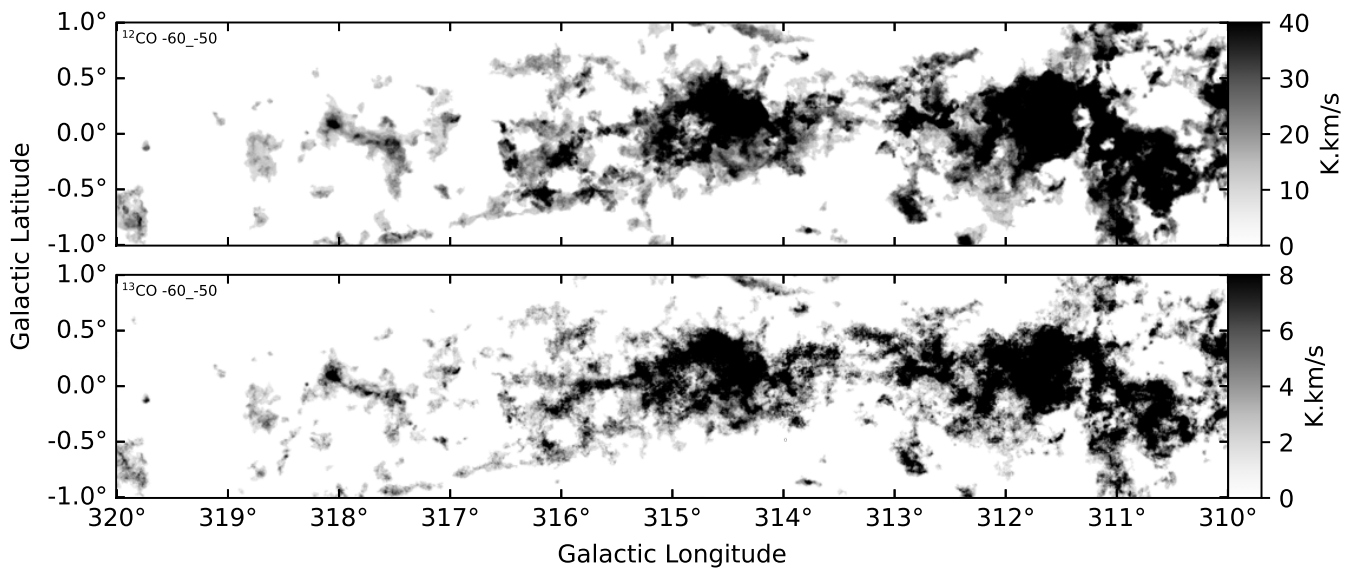

**Figure 98.** Moment 0 image for  $l=310\text{-}320^\circ$  calculated over the velocity interval  $v=-60$  to  $-50\text{ km s}^{-1}$  using the main beam intensity,  $T_{MB}$ . The grayscale  $^{12}\text{CO}$  runs from 0 to 40 K.km/s, while the  $^{13}\text{CO}$  from 0 to 8 K.km/s.

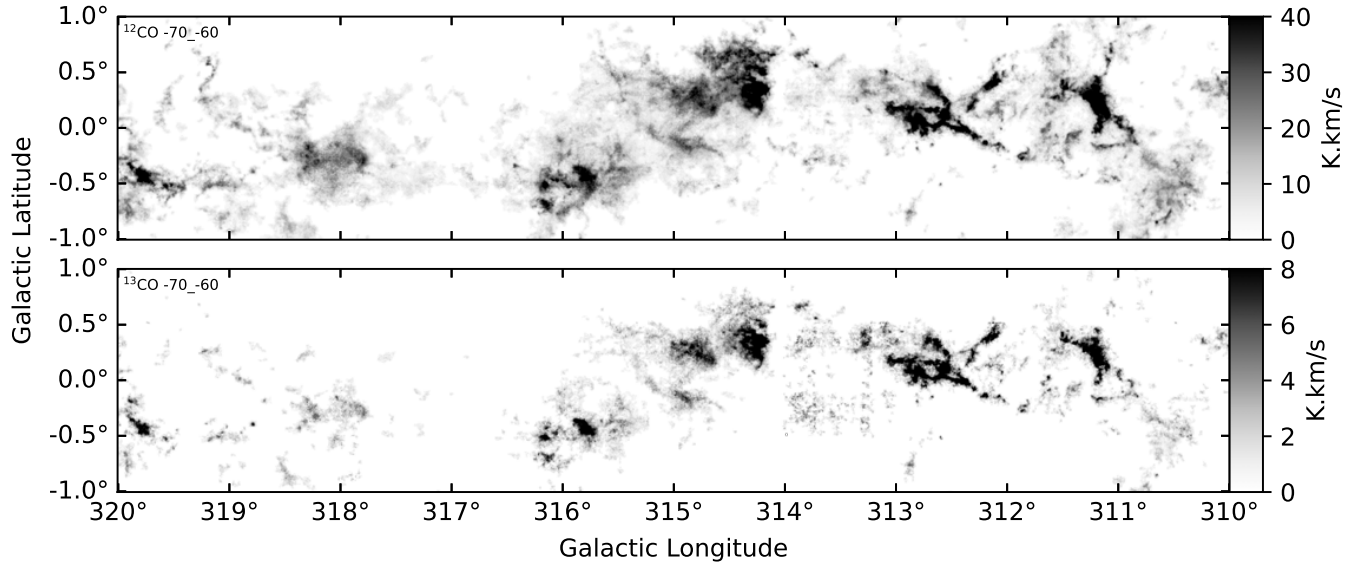

**Figure 99.** Moment 0 image for  $l=310\text{--}320^\circ$  calculated over the velocity interval  $v=-70$  to  $-60$   $\text{km s}^{-1}$  using the main beam intensity,  $T_{MB}$ . The grayscale  $^{12}\text{CO}$  runs from 0 to 40 K.km/s, while the  $^{13}\text{CO}$  from 0 to 8 K.km/s.

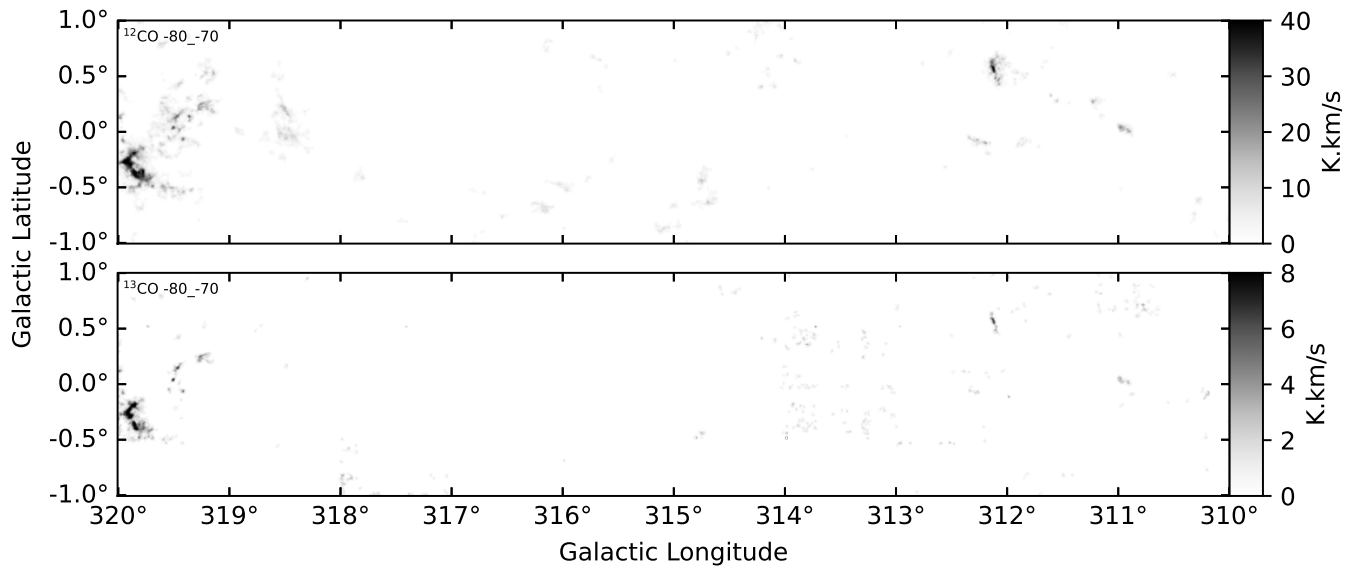

**Figure 100.** Moment 0 image for  $l=310\text{--}320^\circ$  calculated over the velocity interval  $v=-80$  to  $-70$   $\text{km s}^{-1}$  using the main beam intensity,  $T_{MB}$ . The grayscale  $^{12}\text{CO}$  runs from 0 to 40 K.km/s, while the  $^{13}\text{CO}$  from 0 to 8 K.km/s.



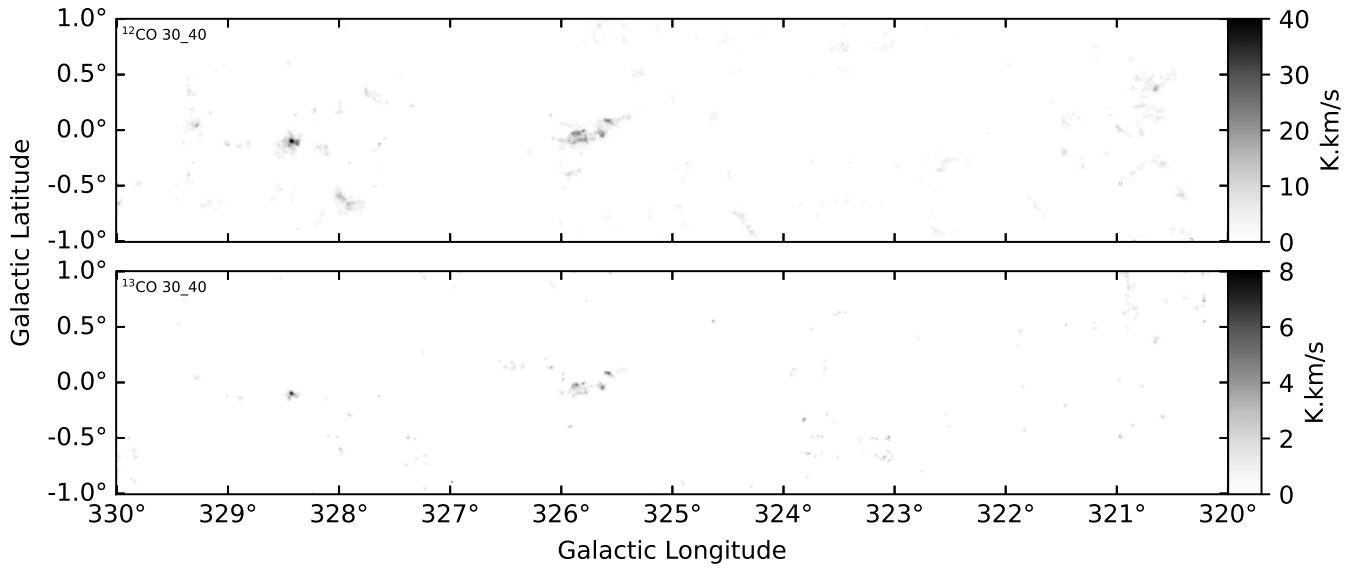

**Figure 101.** Moment 0 image for  $l=320\text{-}330^\circ$  calculated over the velocity interval  $v=30\text{ to }40\text{ km s}^{-1}$  using the main beam intensity,  $T_{MB}$ . The grayscale  $^{12}\text{CO}$  runs from 0 to 40 K.km/s, while the  $^{13}\text{CO}$  from 0 to 8 K.km/s.

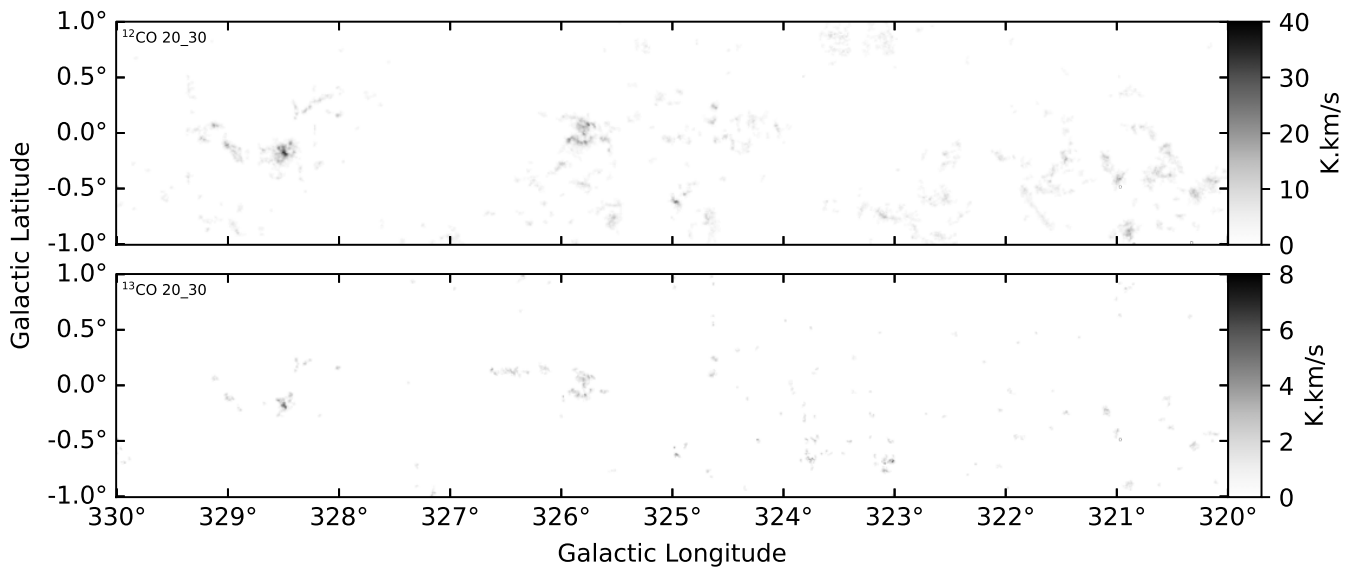

**Figure 102.** Moment 0 image for  $l=320\text{-}330^\circ$  calculated over the velocity interval  $v=20\text{ to }30\text{ km s}^{-1}$  using the main beam intensity,  $T_{MB}$ . The grayscale  $^{12}\text{CO}$  runs from 0 to 40 K.km/s, while the  $^{13}\text{CO}$  from 0 to 8 K.km/s.

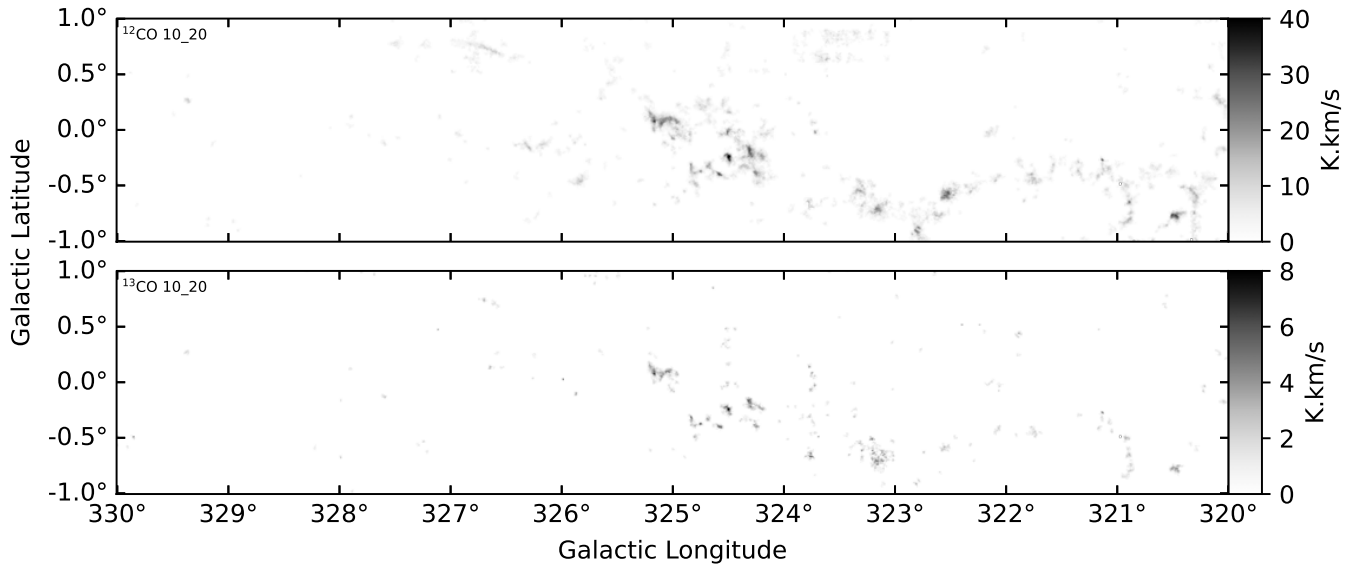

**Figure 103.** Moment 0 image for  $l=320\text{--}330^\circ$  calculated over the velocity interval  $v=10$  to  $20 \text{ km s}^{-1}$  using the main beam intensity,  $T_{MB}$ . The grayscale  $^{12}\text{CO}$  runs from 0 to 40 K.km/s, while the  $^{13}\text{CO}$  from 0 to 8 K.km/s.

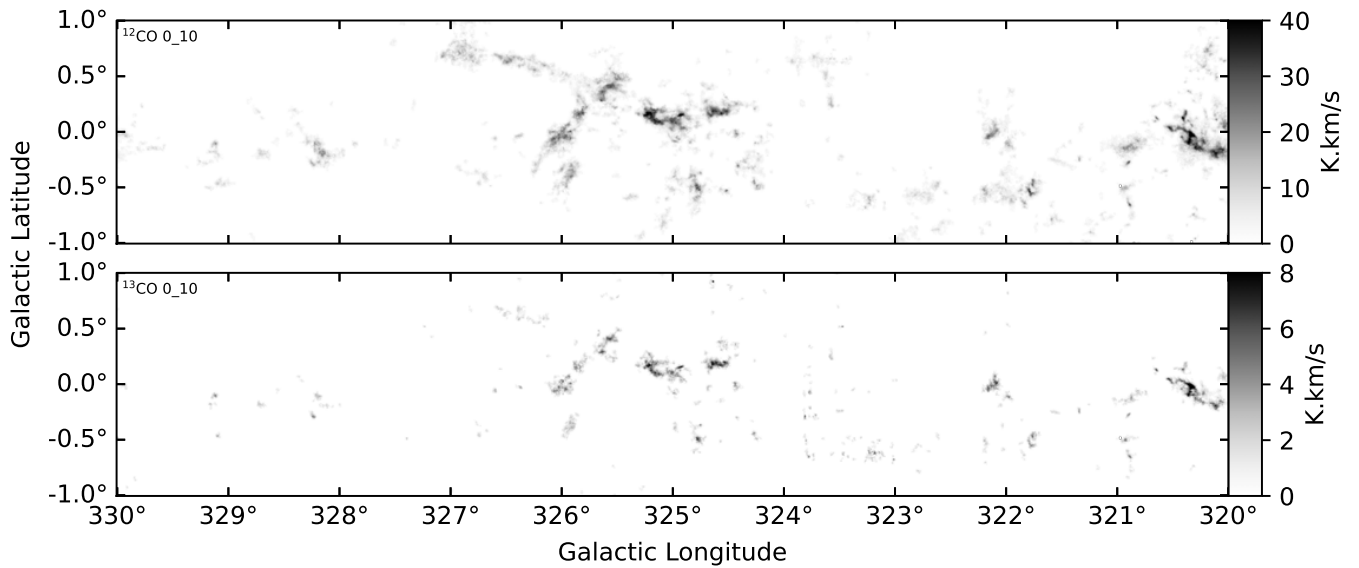

**Figure 104.** Moment 0 image for  $l=320\text{--}330^\circ$  calculated over the velocity interval  $v=0$  to  $10 \text{ km s}^{-1}$  using the main beam intensity,  $T_{MB}$ . The grayscale  $^{12}\text{CO}$  runs from 0 to 40 K.km/s, while the  $^{13}\text{CO}$  from 0 to 8 K.km/s.

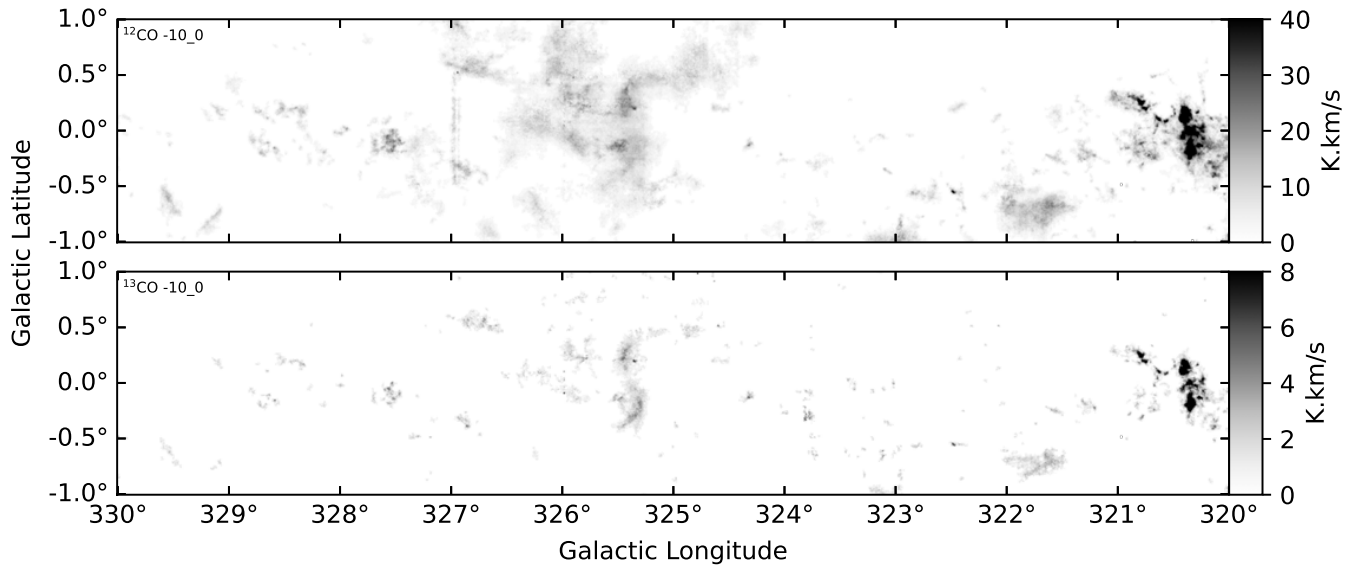

**Figure 105.** Moment 0 image for  $l=320-330^\circ$  calculated over the velocity interval  $v=-10$  to  $0 \text{ km s}^{-1}$  using the main beam intensity,  $T_{MB}$ . The grayscale  $^{12}\text{CO}$  runs from 0 to 40 K.km/s, while the  $^{13}\text{CO}$  from 0 to 8 K.km/s.

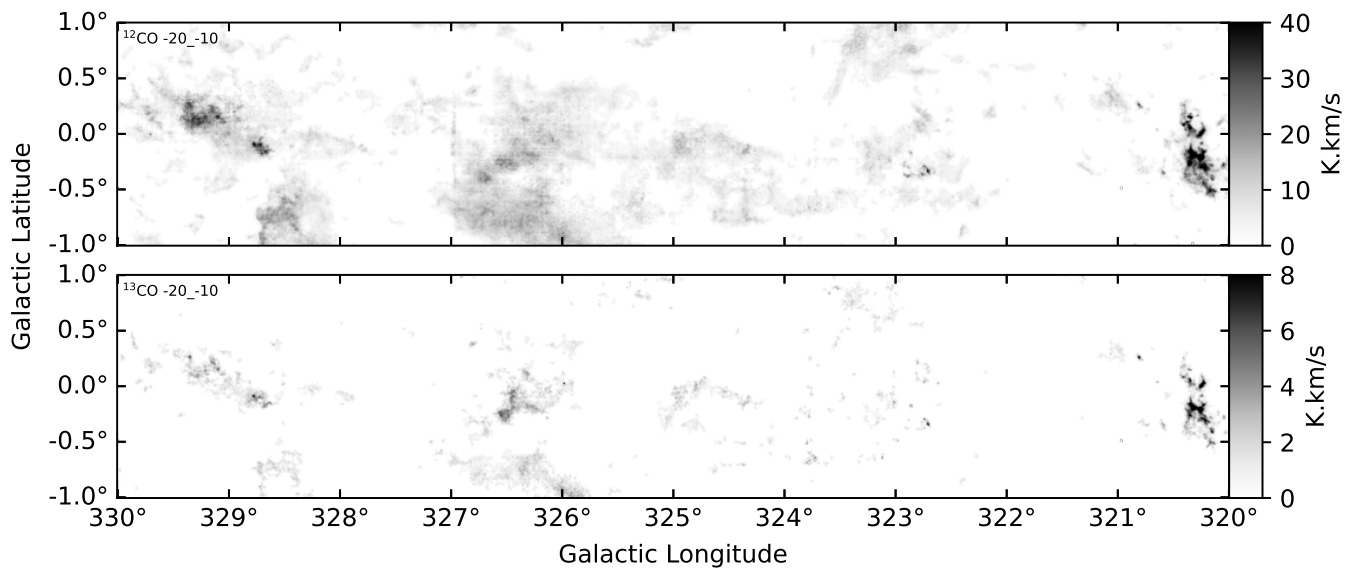

**Figure 106.** Moment 0 image for  $l=320-330^\circ$  calculated over the velocity interval  $v=-20$  to  $-10 \text{ km s}^{-1}$  using the main beam intensity,  $T_{MB}$ . The grayscale  $^{12}\text{CO}$  runs from 0 to 40 K.km/s, while the  $^{13}\text{CO}$  from 0 to 8 K.km/s.

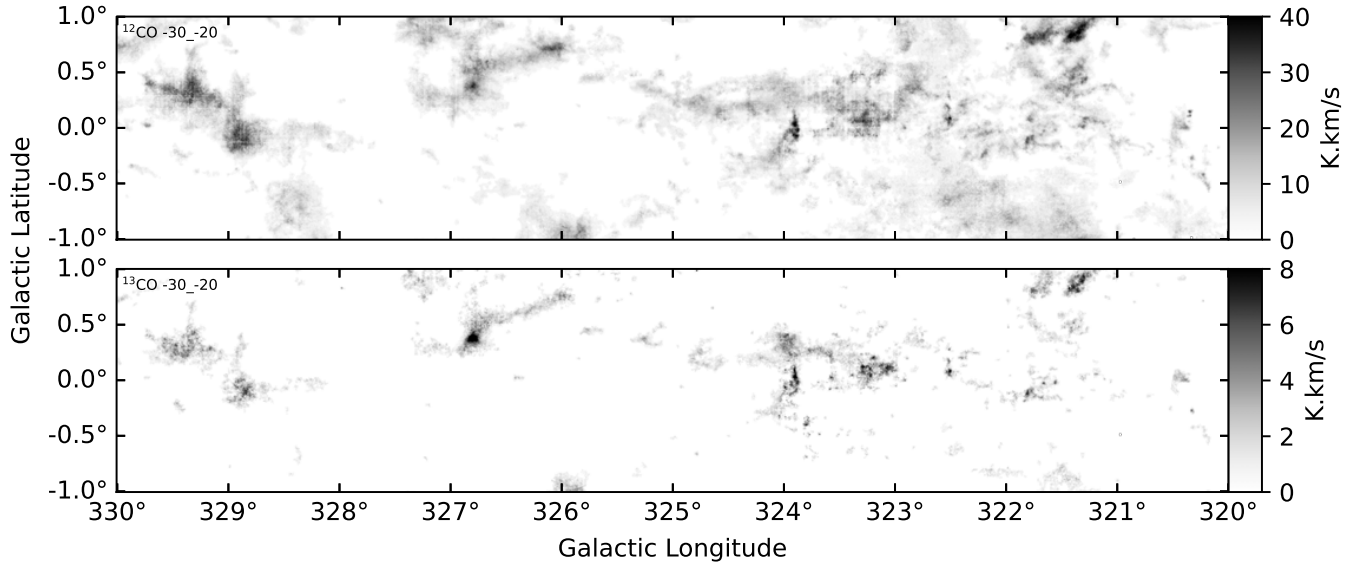

**Figure 107.** Moment 0 image for  $l=320-330^\circ$  calculated over the velocity interval  $v=-30$  to  $-20$  km  $\text{s}^{-1}$  using the main beam intensity,  $T_{MB}$ . The grayscale  $^{12}\text{CO}$  runs from 0 to 40 K.km/s, while the  $^{13}\text{CO}$  from 0 to 8 K.km/s.

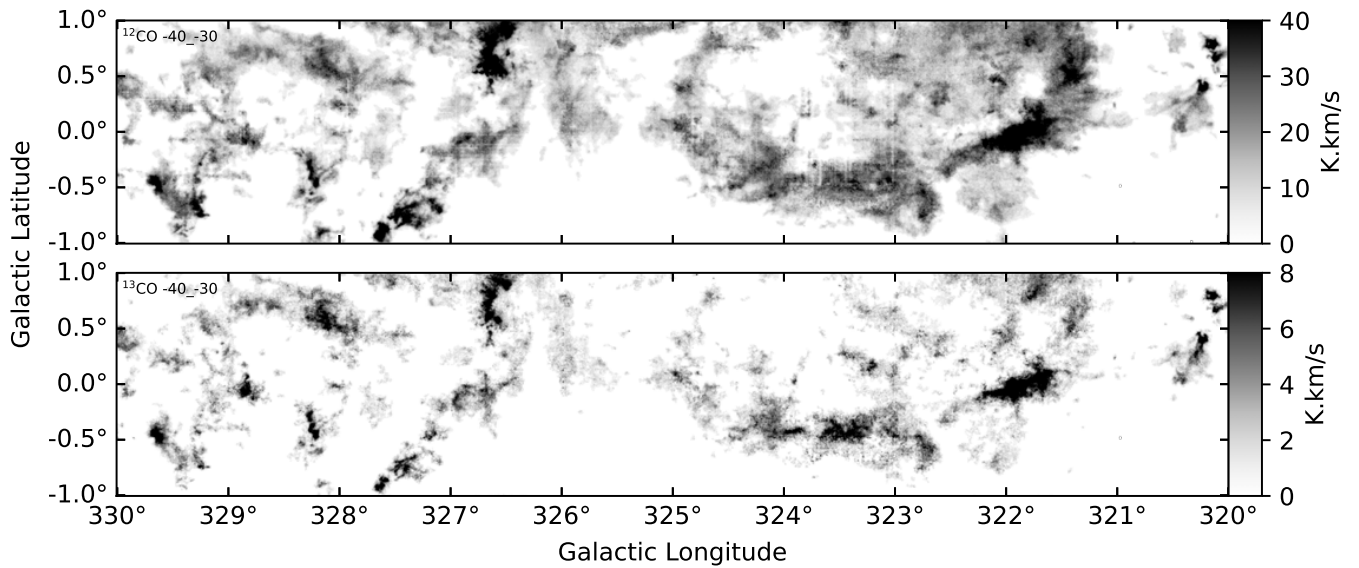

**Figure 108.** Moment 0 image for  $l=320-330^\circ$  calculated over the velocity interval  $v=-40$  to  $-30$  km  $\text{s}^{-1}$  using the main beam intensity,  $T_{MB}$ . The grayscale  $^{12}\text{CO}$  runs from 0 to 40 K.km/s, while the  $^{13}\text{CO}$  from 0 to 8 K.km/s.

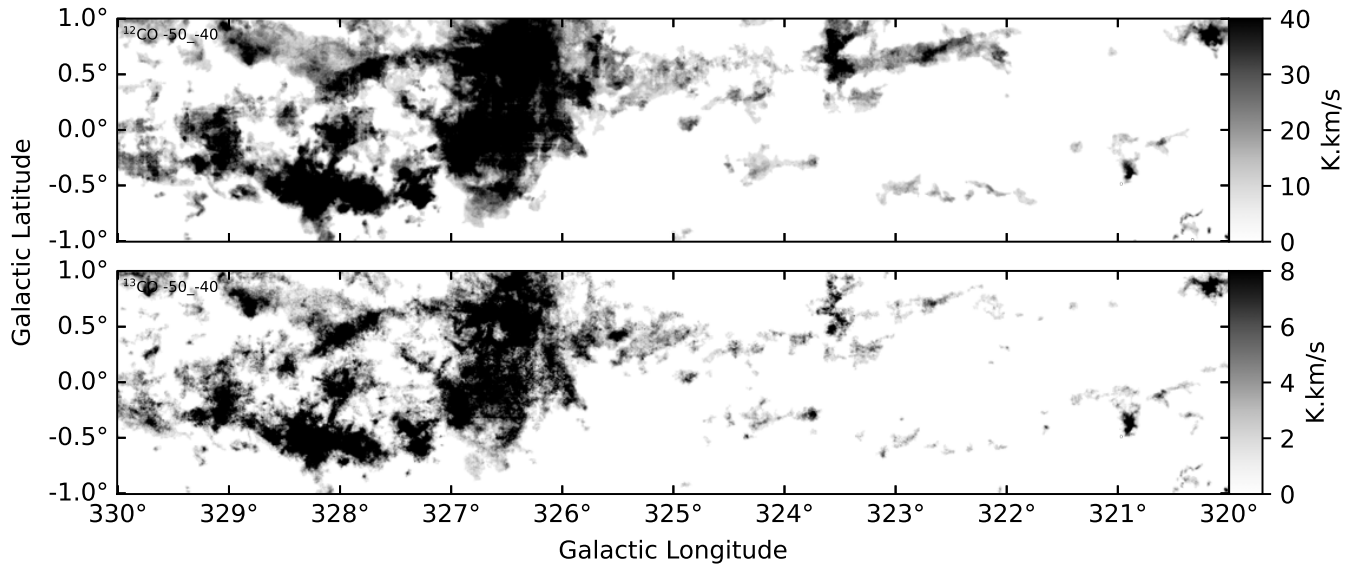

**Figure 109.** Moment 0 image for  $l=320\text{-}330^\circ$  calculated over the velocity interval  $v=-50$  to  $-40 \text{ km s}^{-1}$  using the main beam intensity,  $T_{MB}$ . The grayscale  $^{12}\text{CO}$  runs from 0 to 40  $\text{K.km/s}$ , while the  $^{13}\text{CO}$  from 0 to 8  $\text{K.km/s}$ .

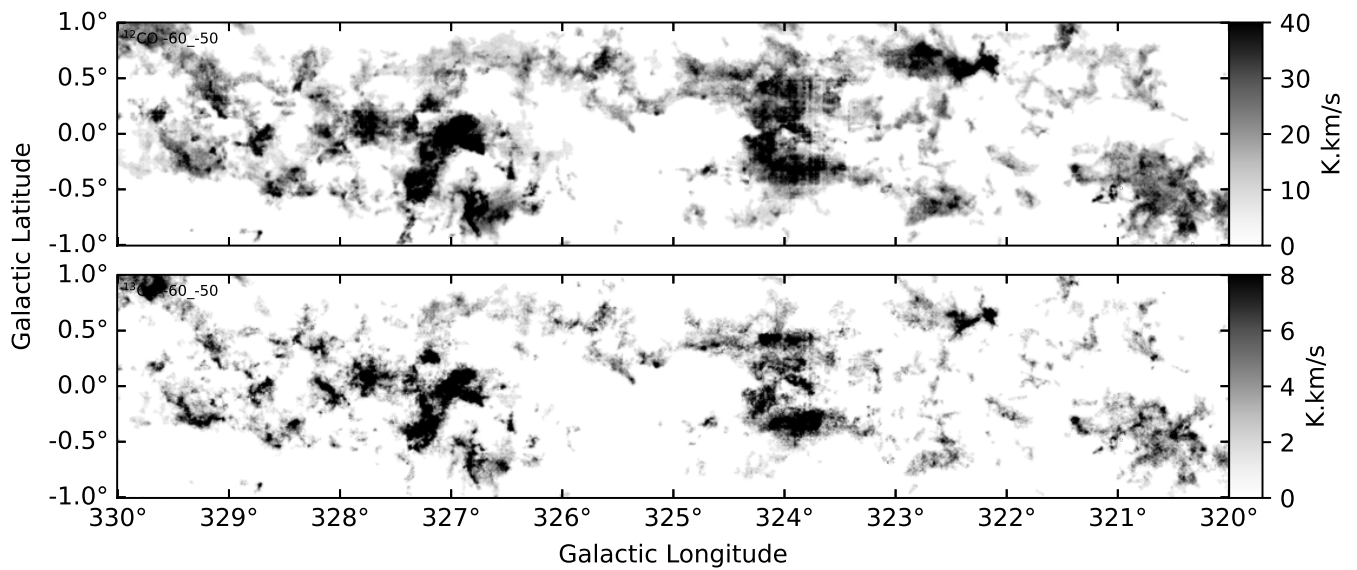

**Figure 110.** Moment 0 image for  $l=320\text{-}330^\circ$  calculated over the velocity interval  $v=-60$  to  $-50 \text{ km s}^{-1}$  using the main beam intensity,  $T_{MB}$ . The grayscale  $^{12}\text{CO}$  runs from 0 to 40  $\text{K.km/s}$ , while the  $^{13}\text{CO}$  from 0 to 8  $\text{K.km/s}$ .

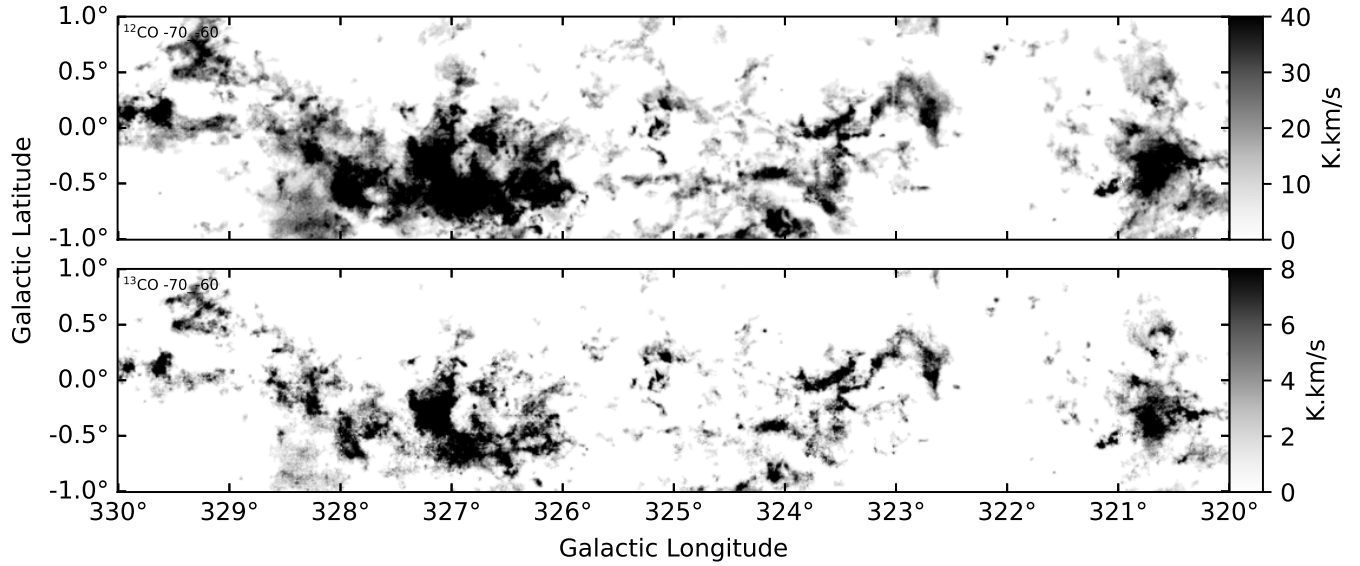

**Figure 111.** Moment 0 image for  $l=320-330^\circ$  calculated over the velocity interval  $v=-70$  to  $-60 \text{ km s}^{-1}$  using the main beam intensity,  $T_{MB}$ . The grayscale  $^{12}\text{CO}$  runs from 0 to 40 K.km/s, while the  $^{13}\text{CO}$  from 0 to 8 K.km/s.

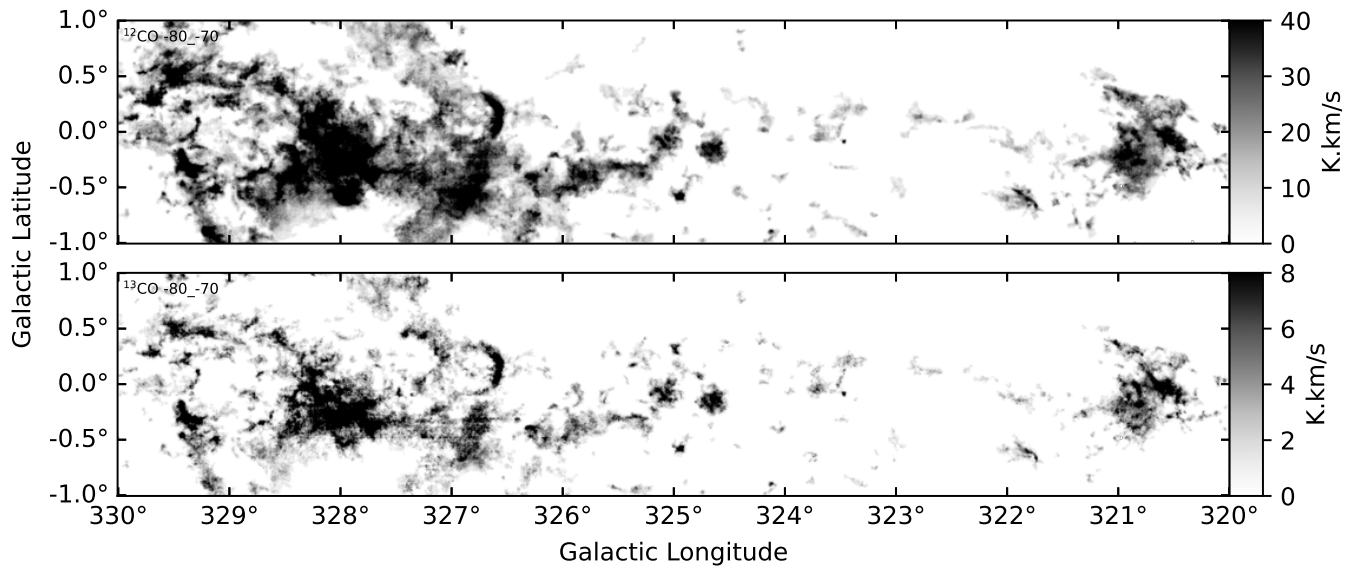

**Figure 112.** Moment 0 image for  $l=320-330^\circ$  calculated over the velocity interval  $v=-80$  to  $-70 \text{ km s}^{-1}$  using the main beam intensity,  $T_{MB}$ . The grayscale  $^{12}\text{CO}$  runs from 0 to 40 K.km/s, while the  $^{13}\text{CO}$  from 0 to 8 K.km/s.

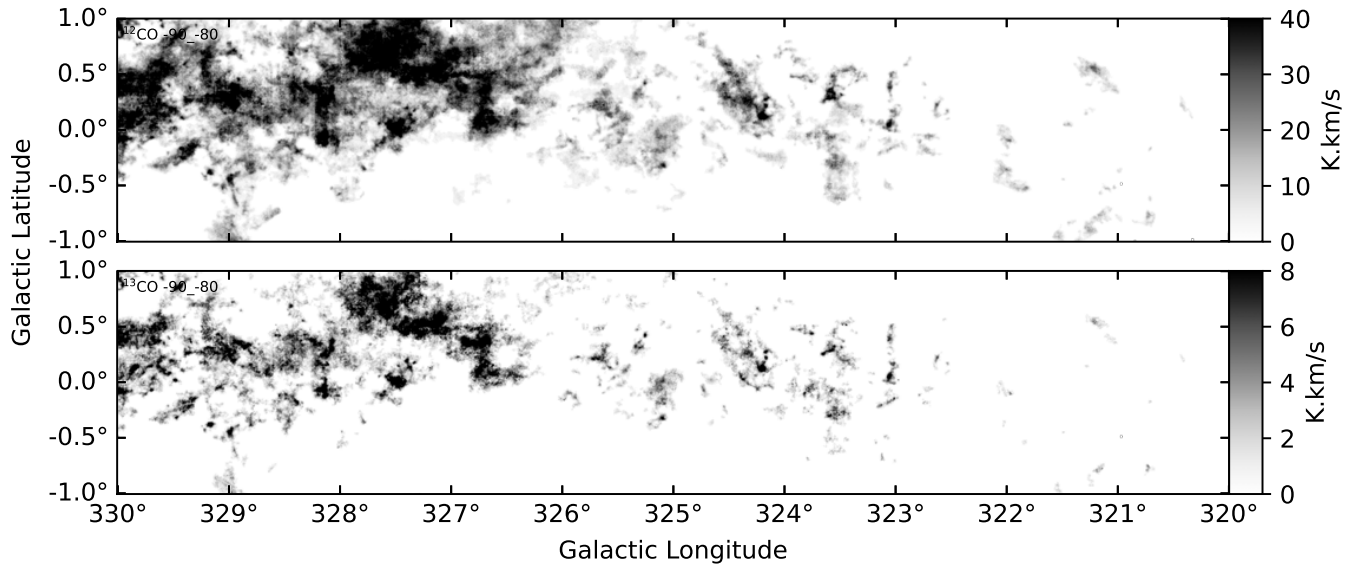

**Figure 113.** Moment 0 image for  $l=320-330^\circ$  calculated over the velocity interval  $v=-90$  to  $-80$  km  $s^{-1}$  using the main beam intensity,  $T_{MB}$ . The grayscale  $^{12}\text{CO}$  runs from 0 to 40 K.km/s, while the  $^{13}\text{CO}$  from 0 to 8 K.km/s.

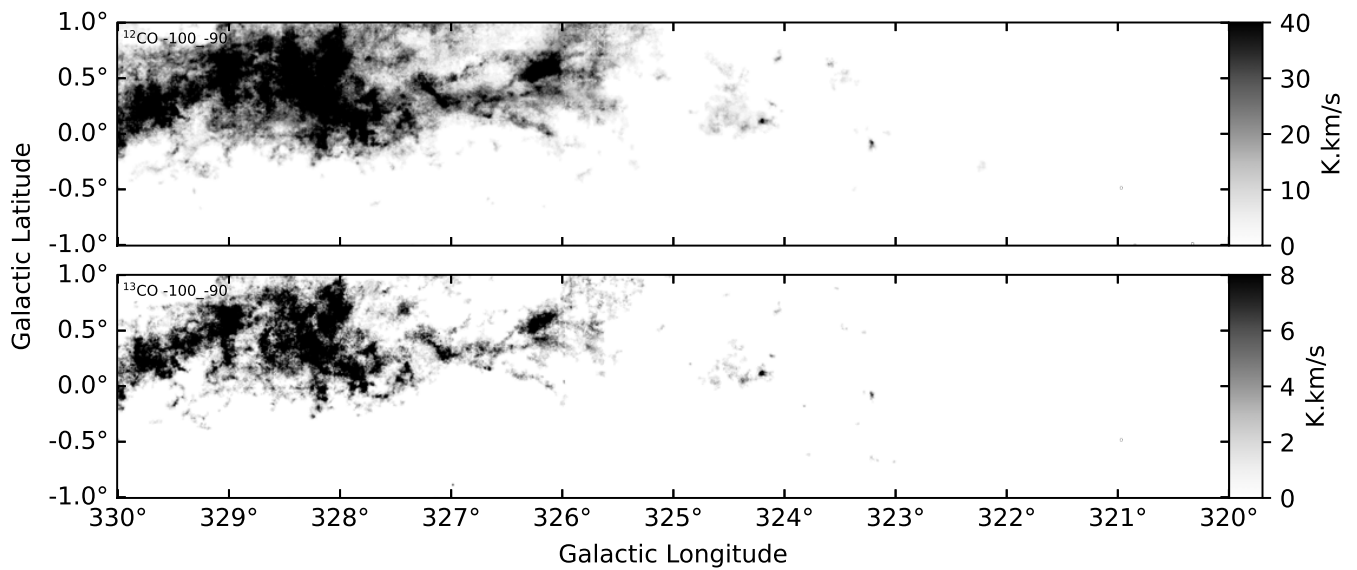

**Figure 114.** Moment 0 image for  $l=320-330^\circ$  calculated over the velocity interval  $v=-100$  to  $-90$  km  $s^{-1}$  using the main beam intensity,  $T_{MB}$ . The grayscale  $^{12}\text{CO}$  runs from 0 to 40 K.km/s, while the  $^{13}\text{CO}$  from 0 to 8 K.km/s.

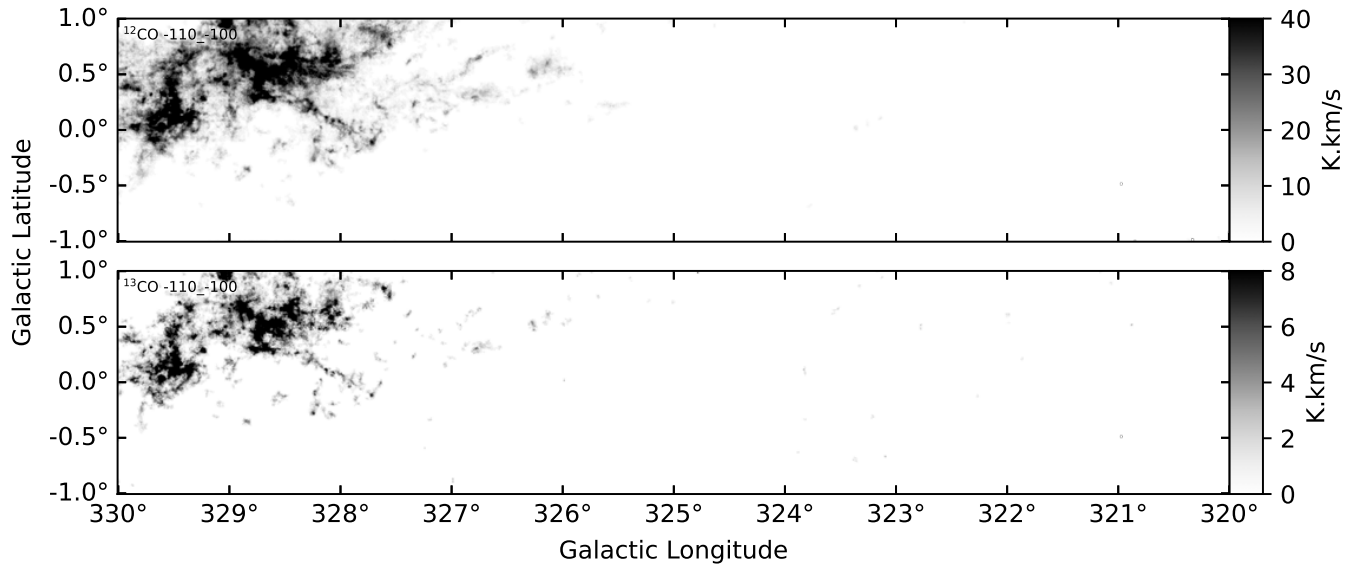

**Figure 115.** Moment 0 image for  $l=320\text{--}330^\circ$  calculated over the velocity interval  $v=-110$  to  $-100$  km  $\text{s}^{-1}$  using the main beam intensity,  $T_{MB}$ . The grayscale  $^{12}\text{CO}$  runs from 0 to 40 K.km/s, while the  $^{13}\text{CO}$  from 0 to 8 K.km/s.

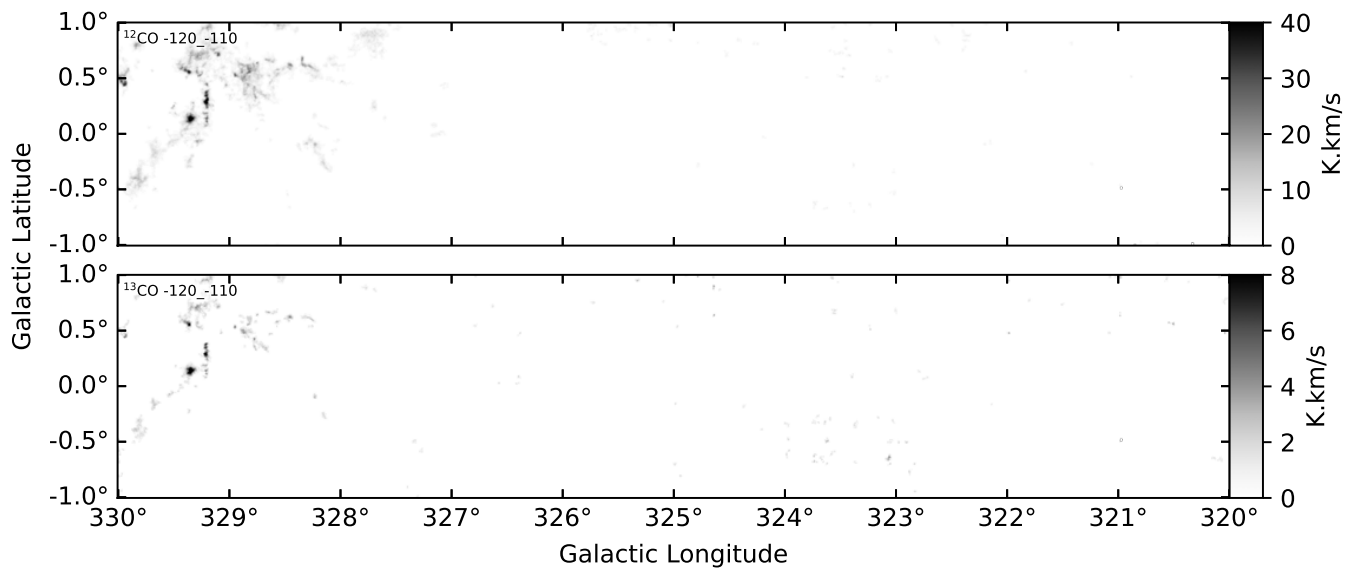

**Figure 116.** Moment 0 image for  $l=320\text{--}330^\circ$  calculated over the velocity interval  $v=-120$  to  $-110$  km  $\text{s}^{-1}$  using the main beam intensity,  $T_{MB}$ . The grayscale  $^{12}\text{CO}$  runs from 0 to 40 K.km/s, while the  $^{13}\text{CO}$  from 0 to 8 K.km/s.



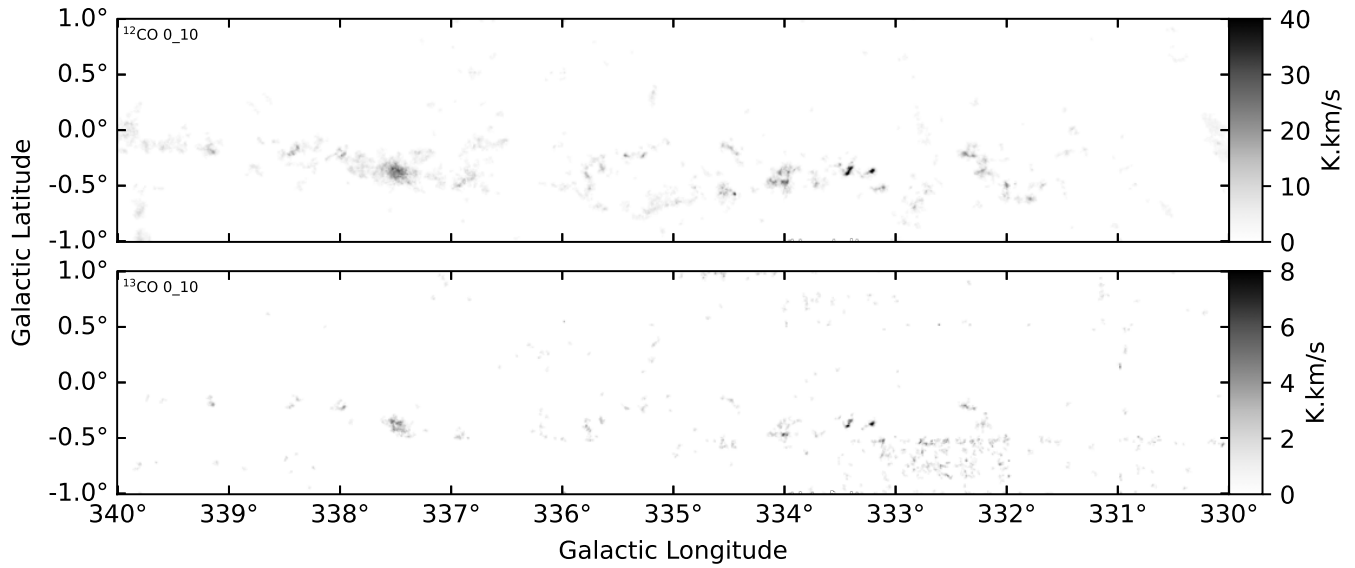

**Figure 117.** Moment 0 image for  $l=330\text{-}340^\circ$  calculated over the velocity interval  $v=0$  to  $10\text{ km s}^{-1}$  using the main beam intensity,  $T_{MB}$ . The grayscale  $^{12}\text{CO}$  runs from 0 to 40 K.km/s, while the  $^{13}\text{CO}$  from 0 to 8 K.km/s.

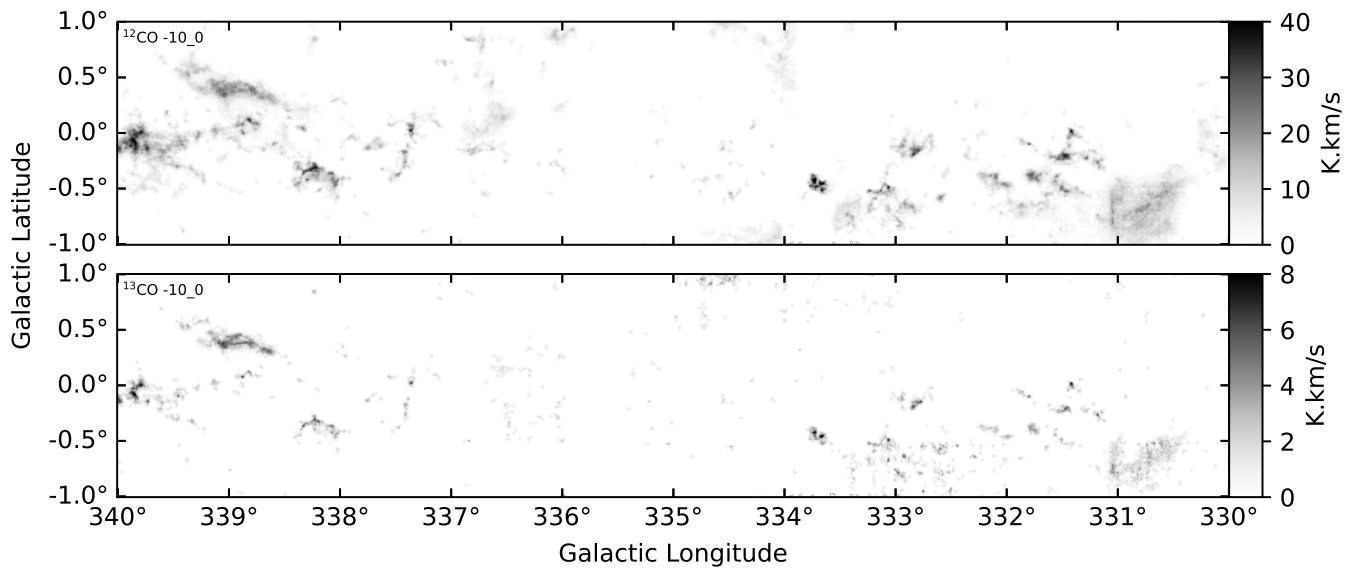

**Figure 118.** Moment 0 image for  $l=330\text{-}340^\circ$  calculated over the velocity interval  $v=-10$  to  $0\text{ km s}^{-1}$  using the main beam intensity,  $T_{MB}$ . The grayscale  $^{12}\text{CO}$  runs from 0 to 40 K.km/s, while the  $^{13}\text{CO}$  from 0 to 8 K.km/s.

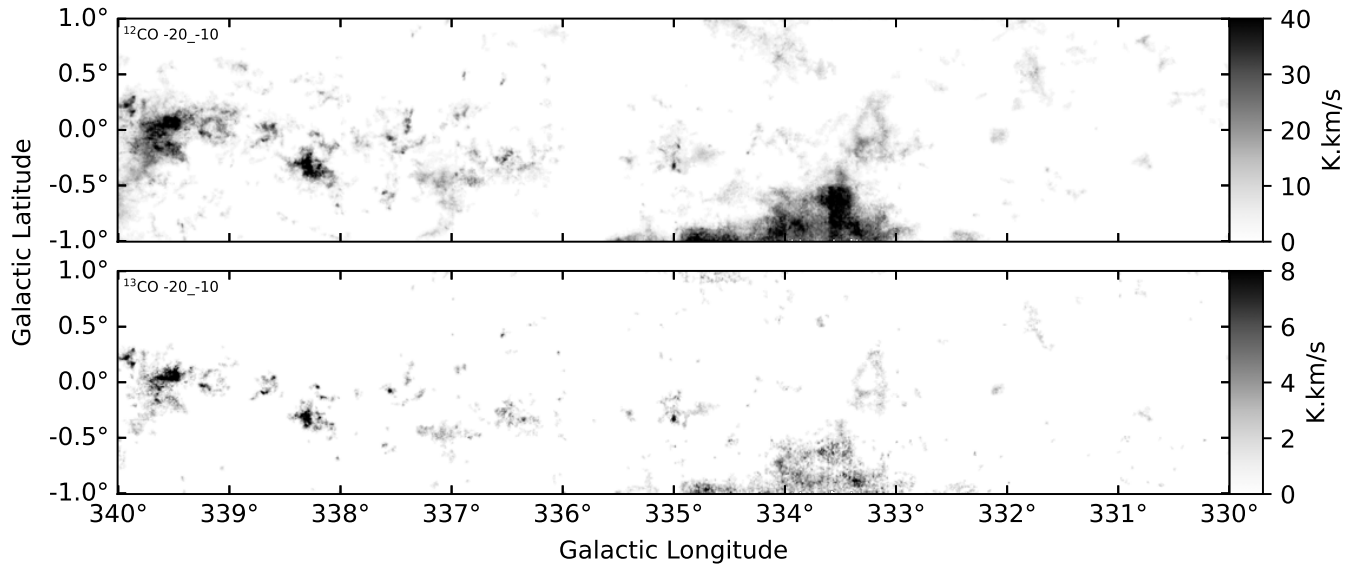

**Figure 119.** Moment 0 image for  $l=330-340^\circ$  calculated over the velocity interval  $v=-20$  to  $-10$  km  $\text{s}^{-1}$  using the main beam intensity,  $T_{MB}$ . The grayscale  $^{12}\text{CO}$  runs from 0 to 40 K.km/s, while the  $^{13}\text{CO}$  from 0 to 8 K.km/s.

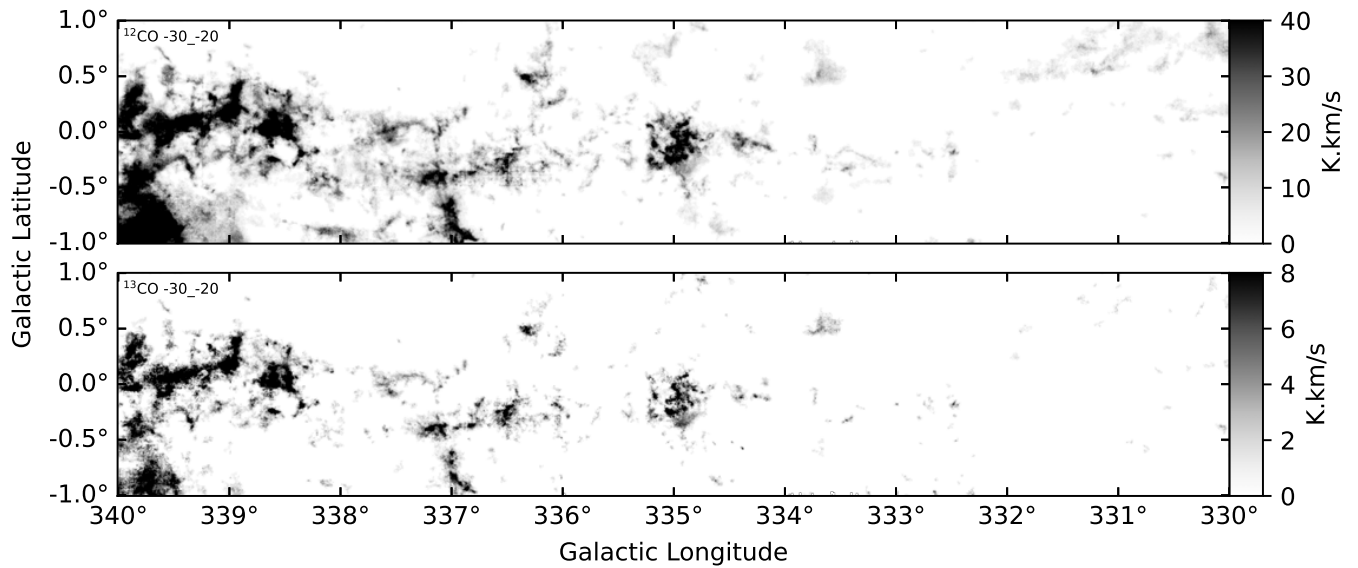

**Figure 120.** Moment 0 image for  $l=330-340^\circ$  calculated over the velocity interval  $v=-30$  to  $-20$  km  $\text{s}^{-1}$  using the main beam intensity,  $T_{MB}$ . The grayscale  $^{12}\text{CO}$  runs from 0 to 40 K.km/s, while the  $^{13}\text{CO}$  from 0 to 8 K.km/s.

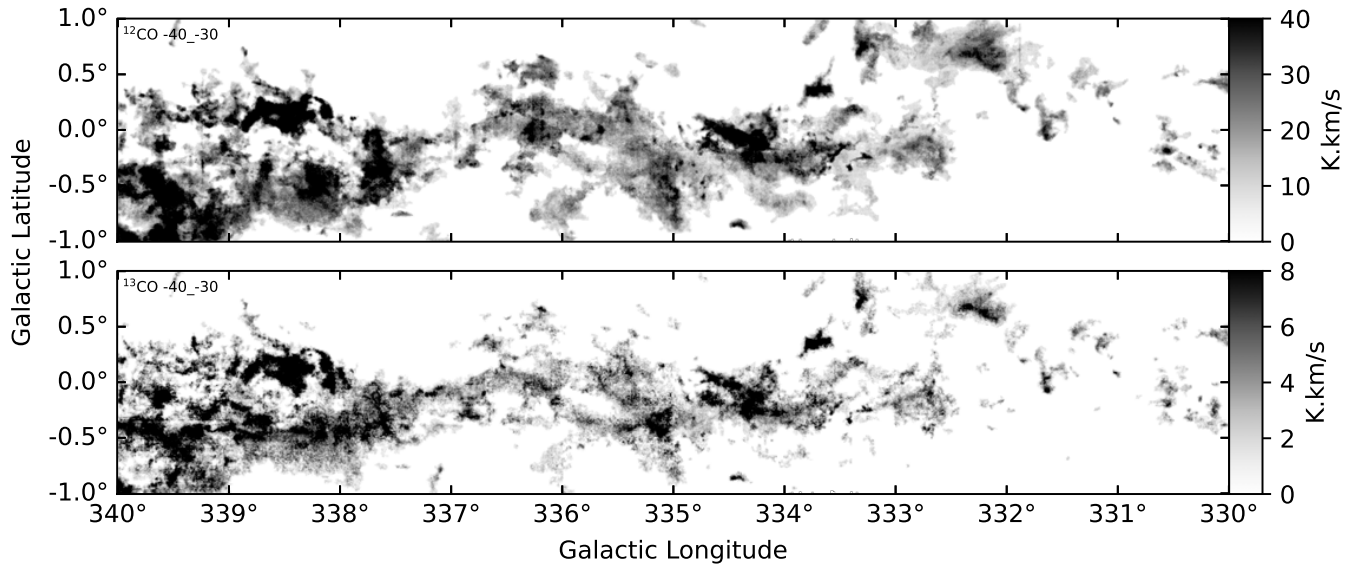

**Figure 121.** Moment 0 image for  $l=330\text{-}340^\circ$  calculated over the velocity interval  $v=-40$  to  $-30$   $\text{km s}^{-1}$  using the main beam intensity,  $T_{MB}$ . The grayscale  $^{12}\text{CO}$  runs from 0 to 40 K.km/s, while the  $^{13}\text{CO}$  from 0 to 8 K.km/s.

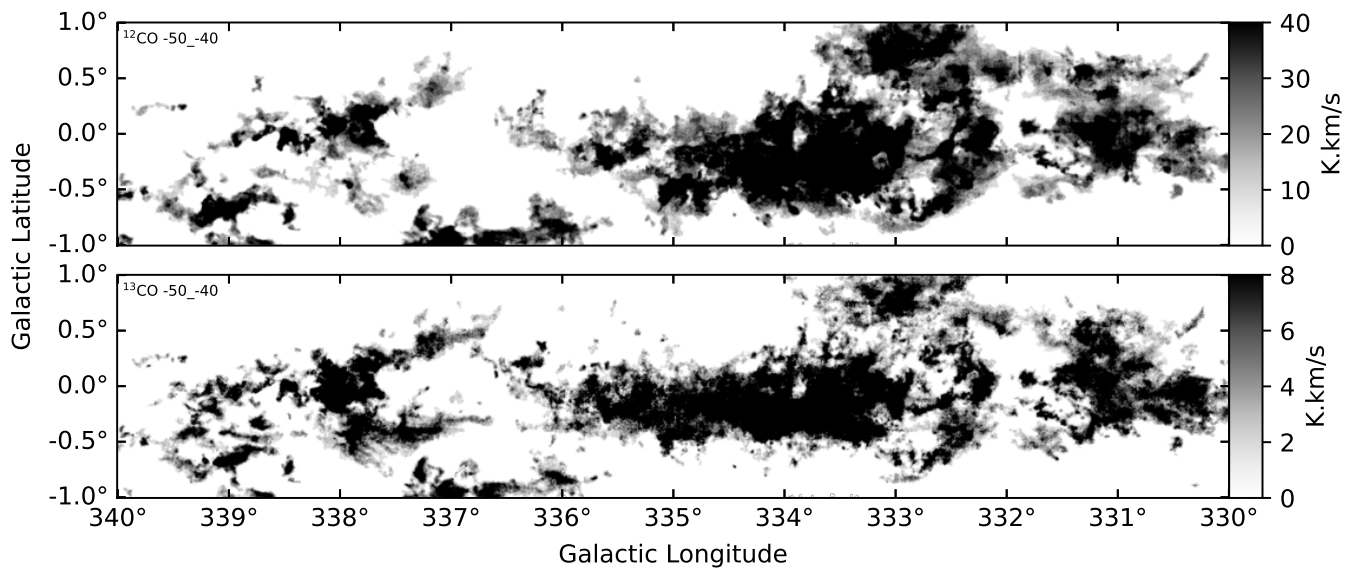

**Figure 122.** Moment 0 image for  $l=330\text{-}340^\circ$  calculated over the velocity interval  $v=-50$  to  $-40$   $\text{km s}^{-1}$  using the main beam intensity,  $T_{MB}$ . The grayscale  $^{12}\text{CO}$  runs from 0 to 40 K.km/s, while the  $^{13}\text{CO}$  from 0 to 8 K.km/s.

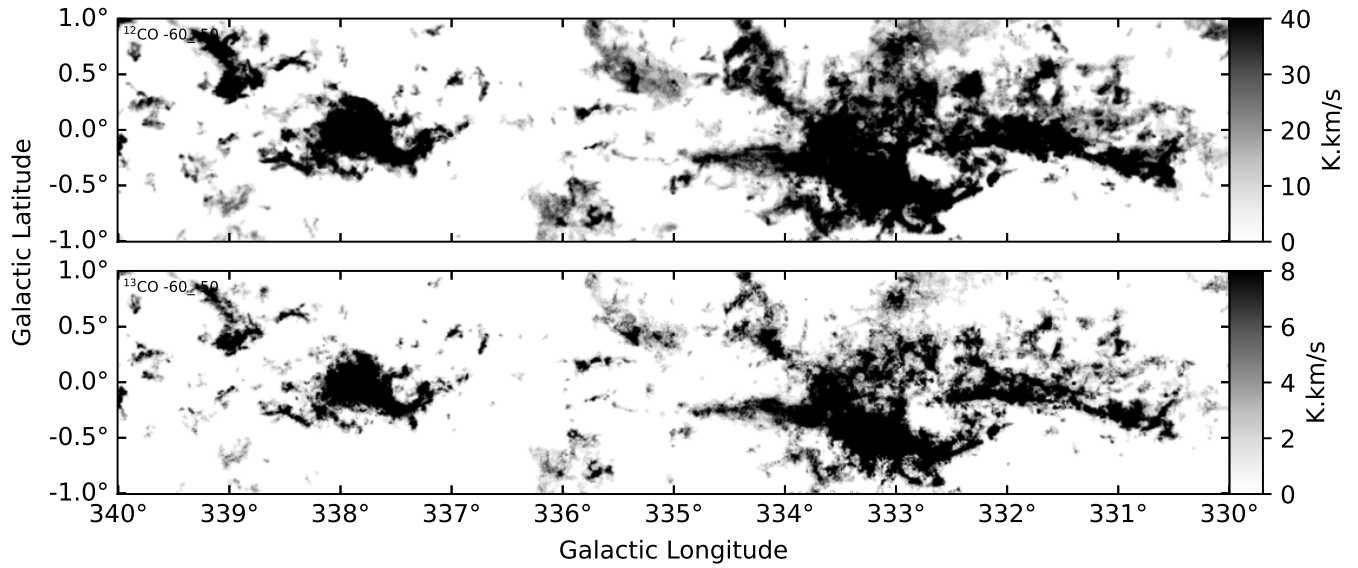

**Figure 123.** Moment 0 image for  $l=330-340^\circ$  calculated over the velocity interval  $v=-60$  to  $-50 \text{ km s}^{-1}$  using the main beam intensity,  $T_{MB}$ . The grayscale  $^{12}\text{CO}$  runs from 0 to 40 K.km/s, while the  $^{13}\text{CO}$  from 0 to 8 K.km/s.

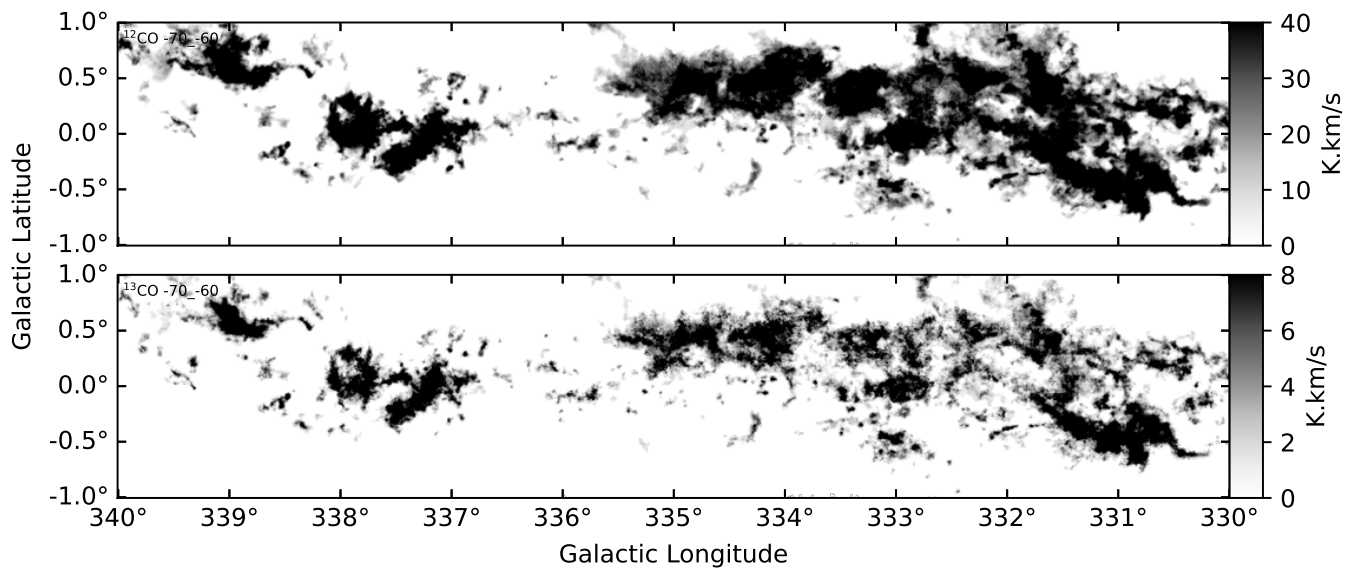

**Figure 124.** Moment 0 image for  $l=330-340^\circ$  calculated over the velocity interval  $v=-70$  to  $-60 \text{ km s}^{-1}$  using the main beam intensity,  $T_{MB}$ . The grayscale  $^{12}\text{CO}$  runs from 0 to 40 K.km/s, while the  $^{13}\text{CO}$  from 0 to 8 K.km/s.

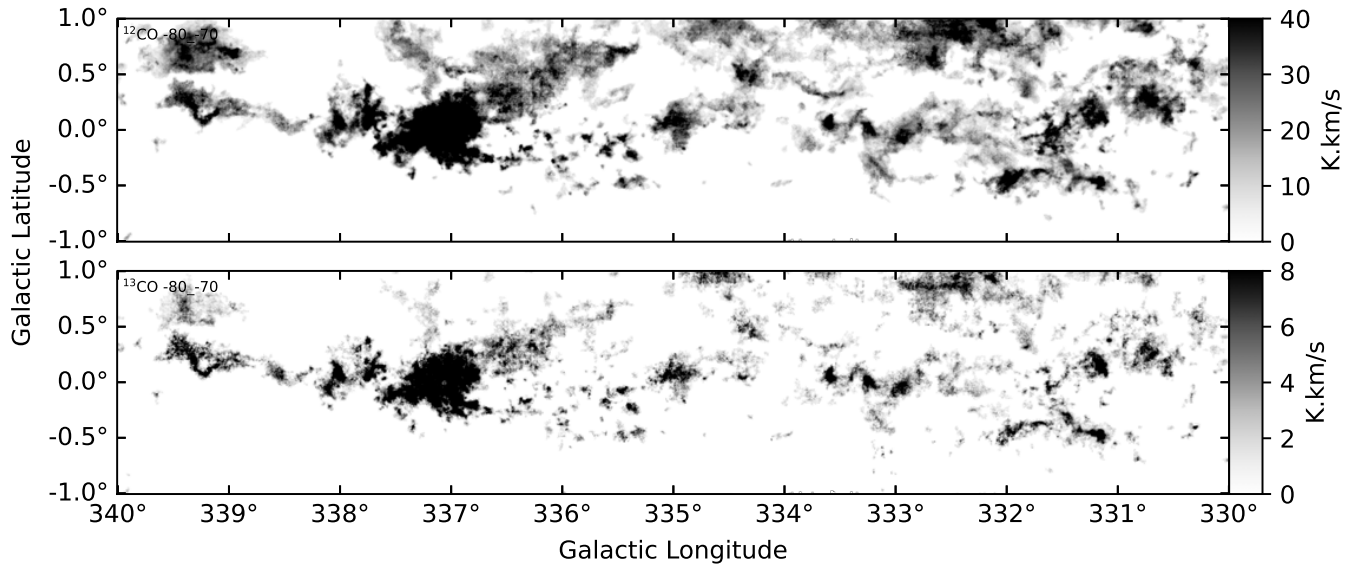

**Figure 125.** Moment 0 image for  $l=330\text{-}340^\circ$  calculated over the velocity interval  $v=-80$  to  $-70 \text{ km s}^{-1}$  using the main beam intensity,  $T_{MB}$ . The grayscale  $^{12}\text{CO}$  runs from 0 to 40  $\text{K.km/s}$ , while the  $^{13}\text{CO}$  from 0 to 8  $\text{K.km/s}$ .

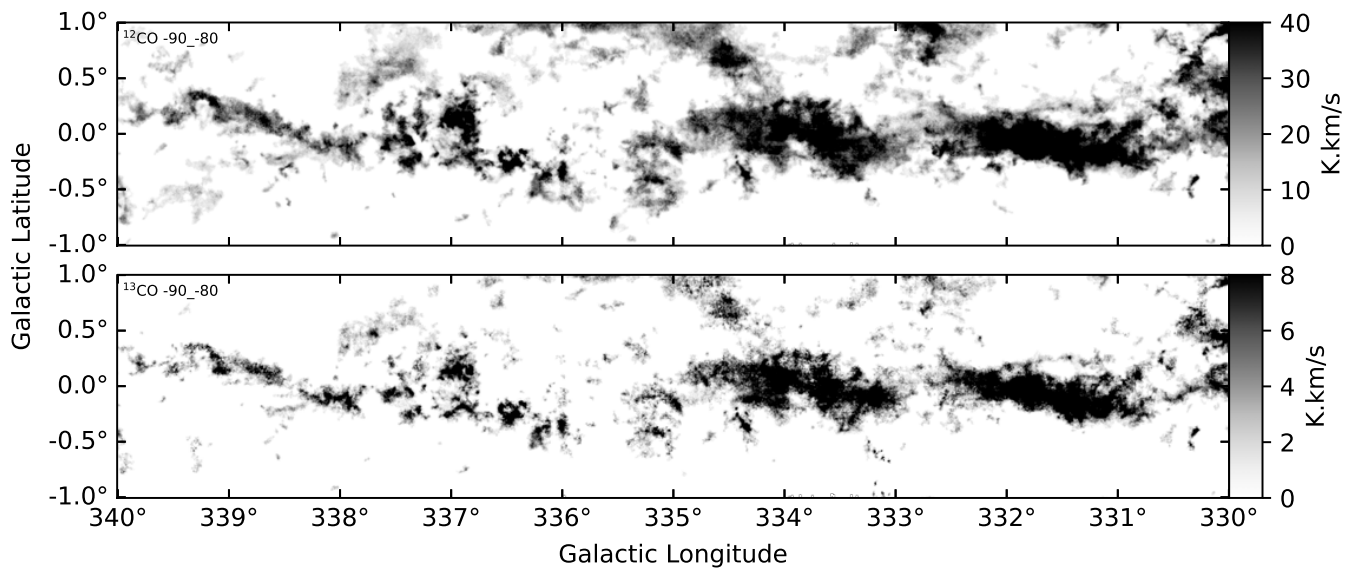

**Figure 126.** Moment 0 image for  $l=330\text{-}340^\circ$  calculated over the velocity interval  $v=-90$  to  $-80 \text{ km s}^{-1}$  using the main beam intensity,  $T_{MB}$ . The grayscale  $^{12}\text{CO}$  runs from 0 to 40  $\text{K.km/s}$ , while the  $^{13}\text{CO}$  from 0 to 8  $\text{K.km/s}$ .

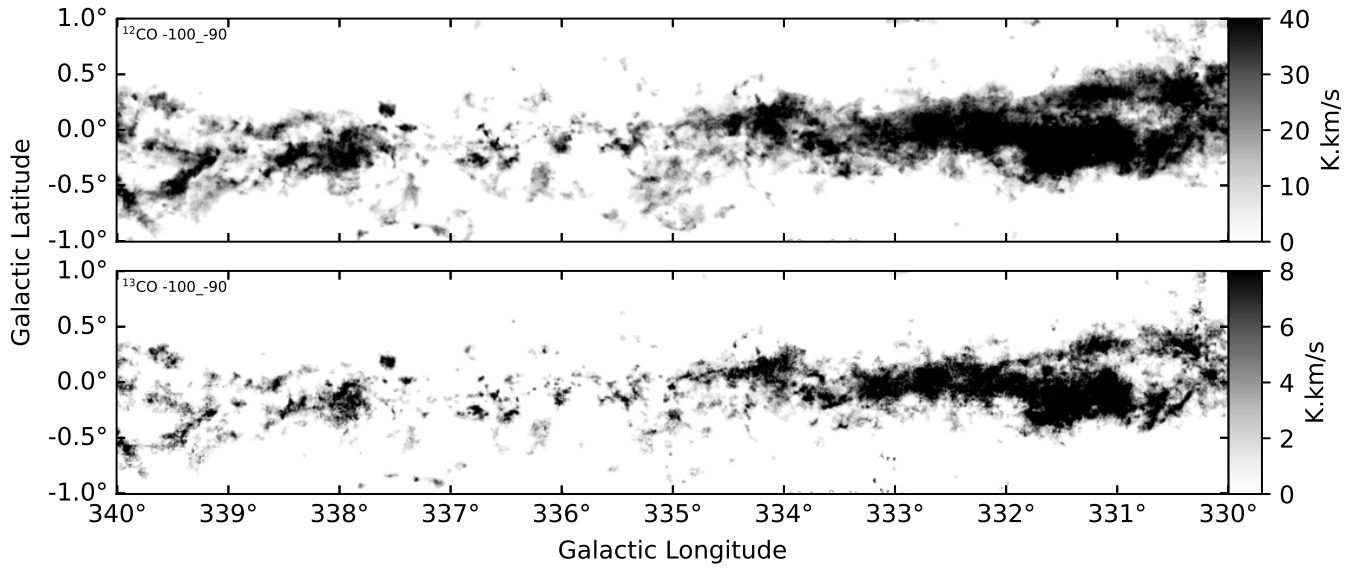

**Figure 127.** Moment 0 image for  $l=330\text{-}340^\circ$  calculated over the velocity interval  $v=-100$  to  $-90$  km  $\text{s}^{-1}$  using the main beam intensity,  $T_{MB}$ . The grayscale  $^{12}\text{CO}$  runs from 0 to 40 K.km/s, while the  $^{13}\text{CO}$  from 0 to 8 K.km/s.

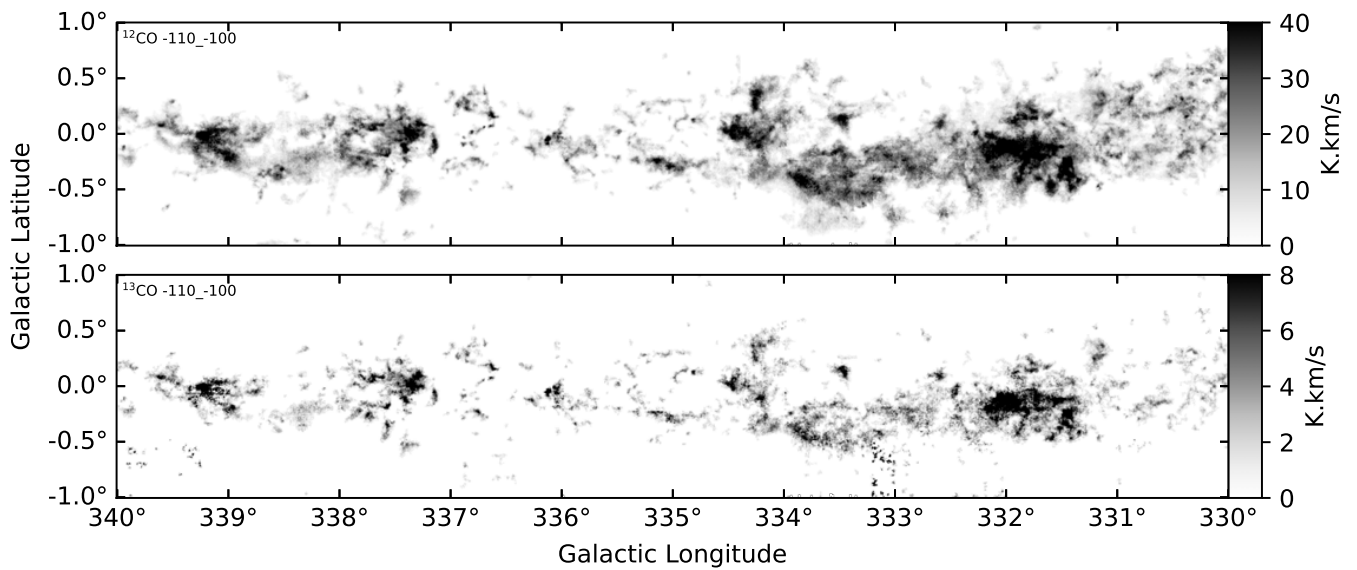

**Figure 128.** Moment 0 image for  $l=330\text{-}340^\circ$  calculated over the velocity interval  $v=-110$  to  $-100$  km  $\text{s}^{-1}$  using the main beam intensity,  $T_{MB}$ . The grayscale  $^{12}\text{CO}$  runs from 0 to 40 K.km/s, while the  $^{13}\text{CO}$  from 0 to 8 K.km/s.

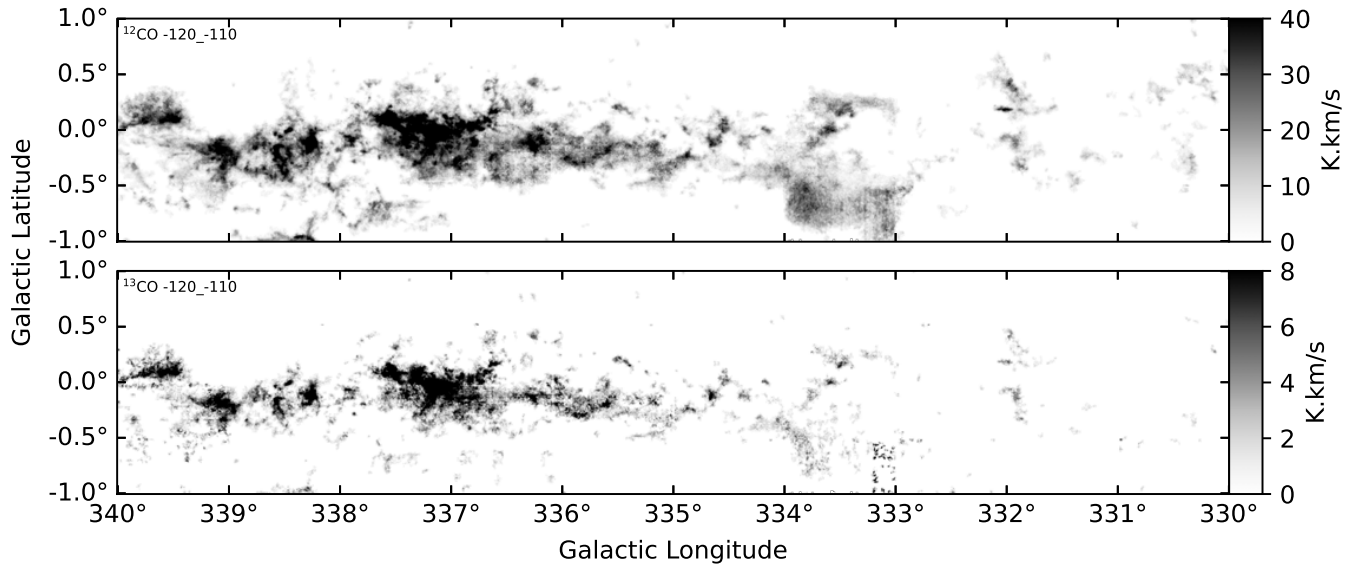

**Figure 129.** Moment 0 image for  $l=330-340^\circ$  calculated over the velocity interval  $v=-120$  to  $-110$  km  $s^{-1}$  using the main beam intensity,  $T_{MB}$ . The grayscale  $^{12}\text{CO}$  runs from 0 to 40 K.km/s, while the  $^{13}\text{CO}$  from 0 to 8 K.km/s.

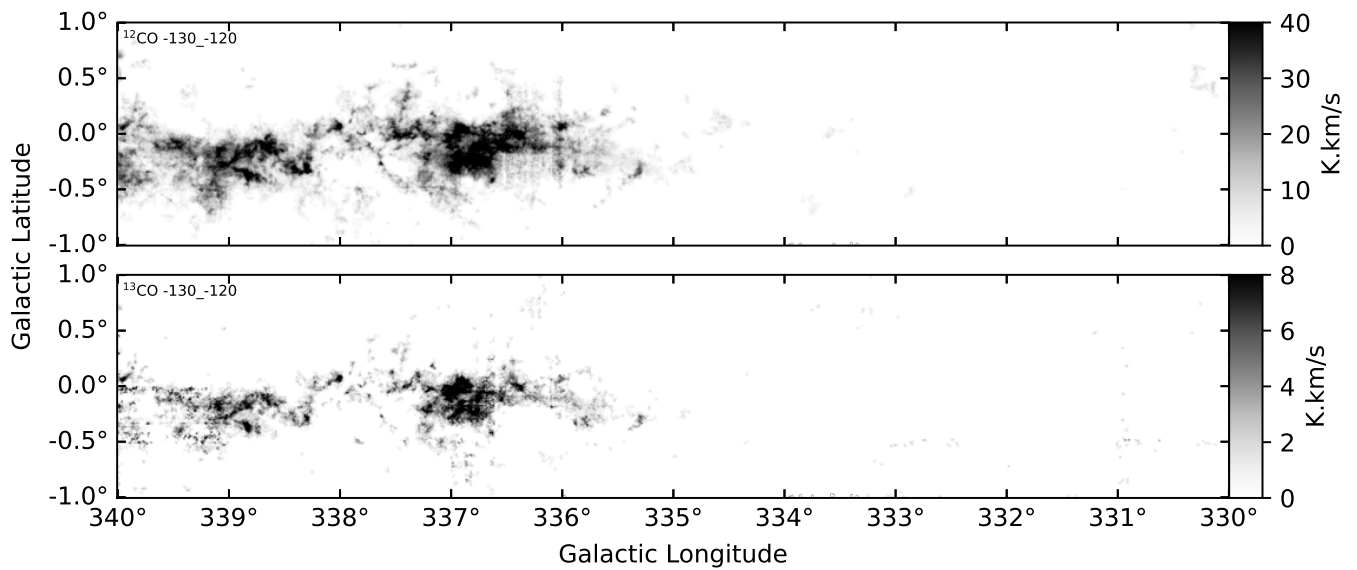

**Figure 130.** Moment 0 image for  $l=330-340^\circ$  calculated over the velocity interval  $v=-130$  to  $-120$  km  $s^{-1}$  using the main beam intensity,  $T_{MB}$ . The grayscale  $^{12}\text{CO}$  runs from 0 to 40 K.km/s, while the  $^{13}\text{CO}$  from 0 to 8 K.km/s.

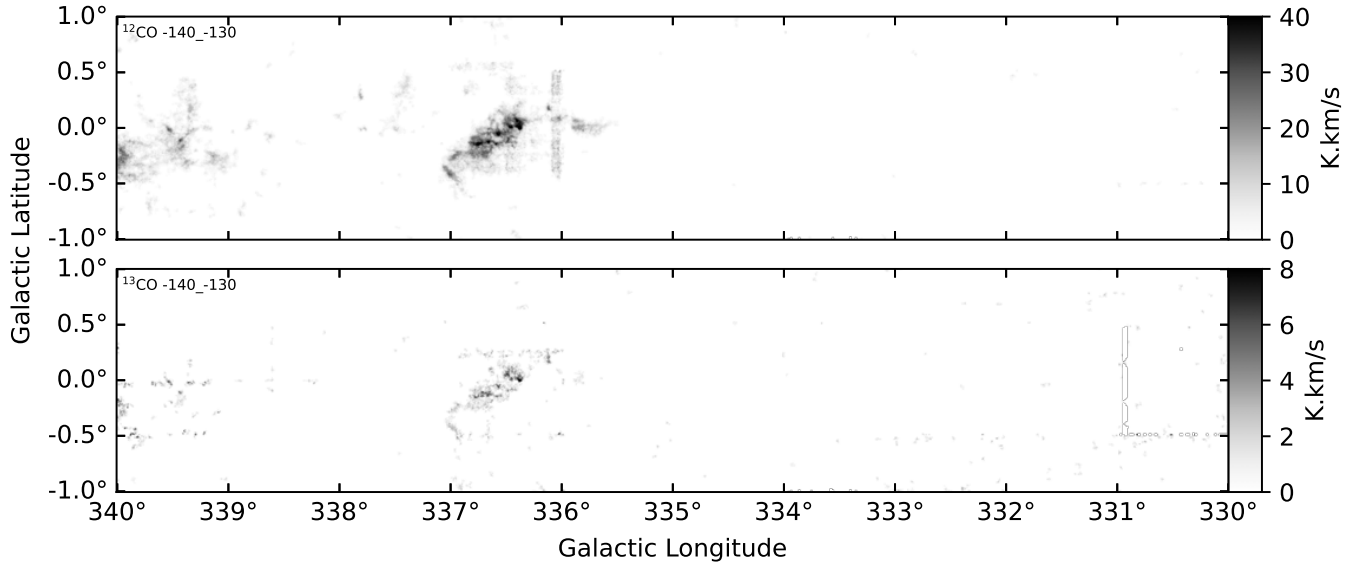

**Figure 131.** Moment 0 image for  $l=330\text{-}340^\circ$  calculated over the velocity interval  $v=-140$  to  $-130$  km  $\text{s}^{-1}$  using the main beam intensity,  $T_{MB}$ . The grayscale  $^{12}\text{CO}$  runs from 0 to 40 K.km/s, while the  $^{13}\text{CO}$  from 0 to 8 K.km/s.

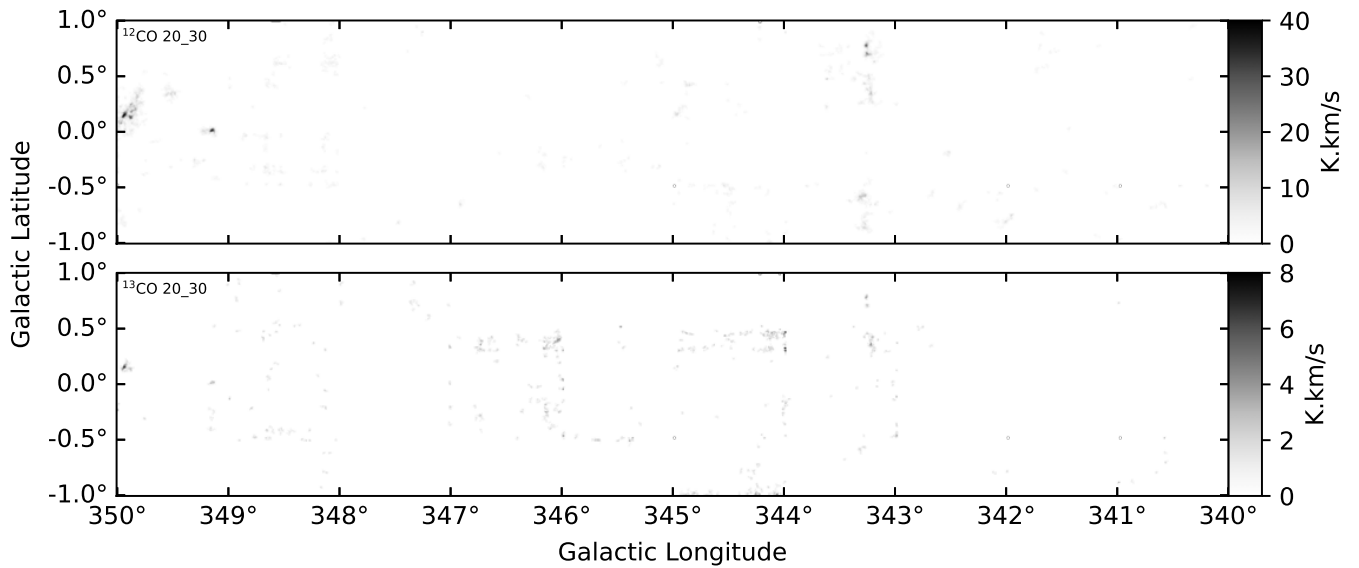

**Figure 132.** Moment 0 image for  $l=340\text{-}350^\circ$  calculated over the velocity interval  $v=20$  to  $30$  km  $\text{s}^{-1}$  using the main beam intensity,  $T_{MB}$ . The grayscale  $^{12}\text{CO}$  runs from 0 to 40 K.km/s, while the  $^{13}\text{CO}$  from 0 to 8 K.km/s.



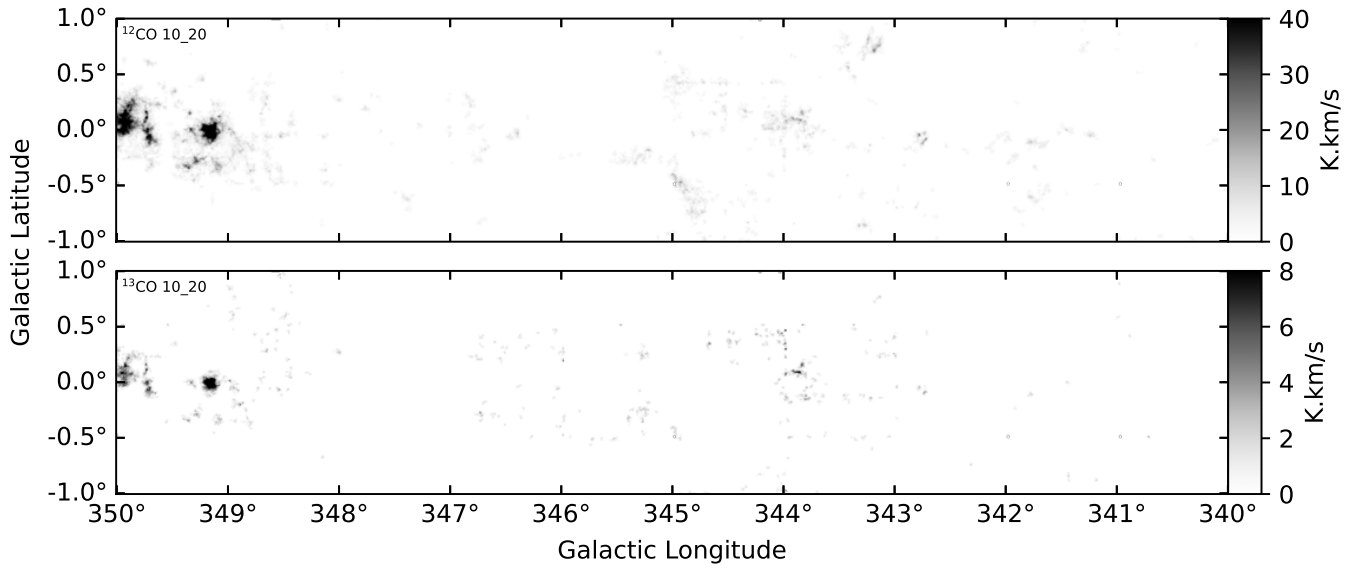

**Figure 133.** Moment 0 image for  $l=340\text{--}350^\circ$  calculated over the velocity interval  $v=10$  to  $20 \text{ km s}^{-1}$  using the main beam intensity,  $T_{MB}$ . The grayscale  $^{12}\text{CO}$  runs from 0 to 40 K.km/s, while the  $^{13}\text{CO}$  from 0 to 8 K.km/s.

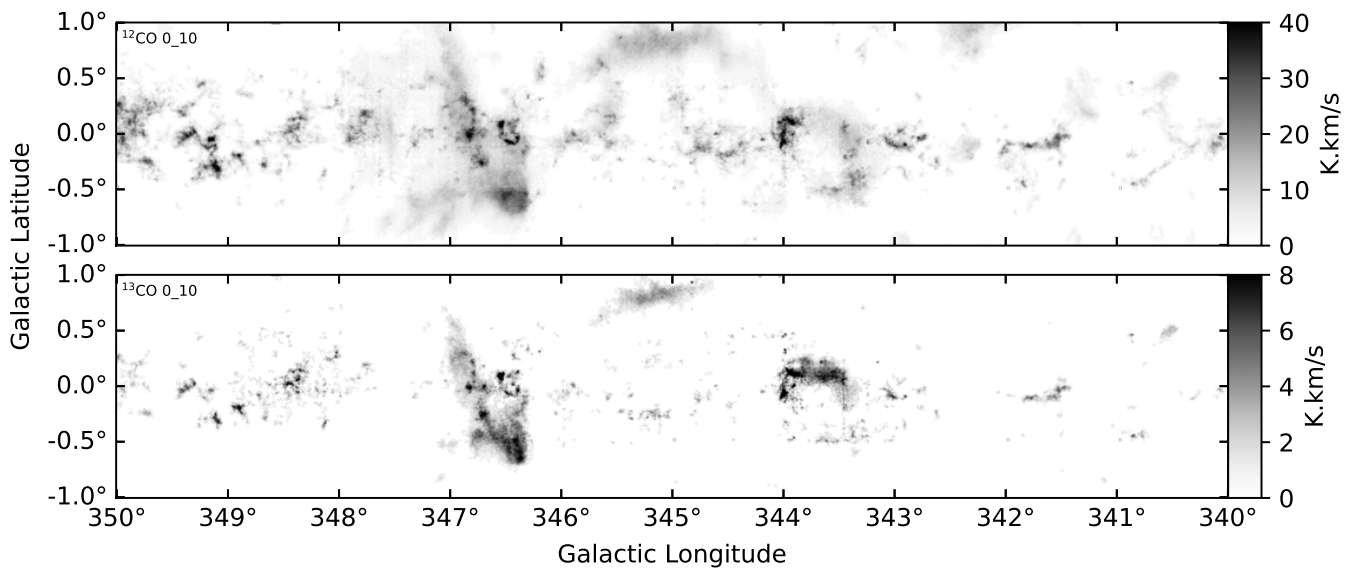

**Figure 134.** Moment 0 image for  $l=340\text{--}350^\circ$  calculated over the velocity interval  $v=0$  to  $10 \text{ km s}^{-1}$  using the main beam intensity,  $T_{MB}$ . The grayscale  $^{12}\text{CO}$  runs from 0 to 40 K.km/s, while the  $^{13}\text{CO}$  from 0 to 8 K.km/s.

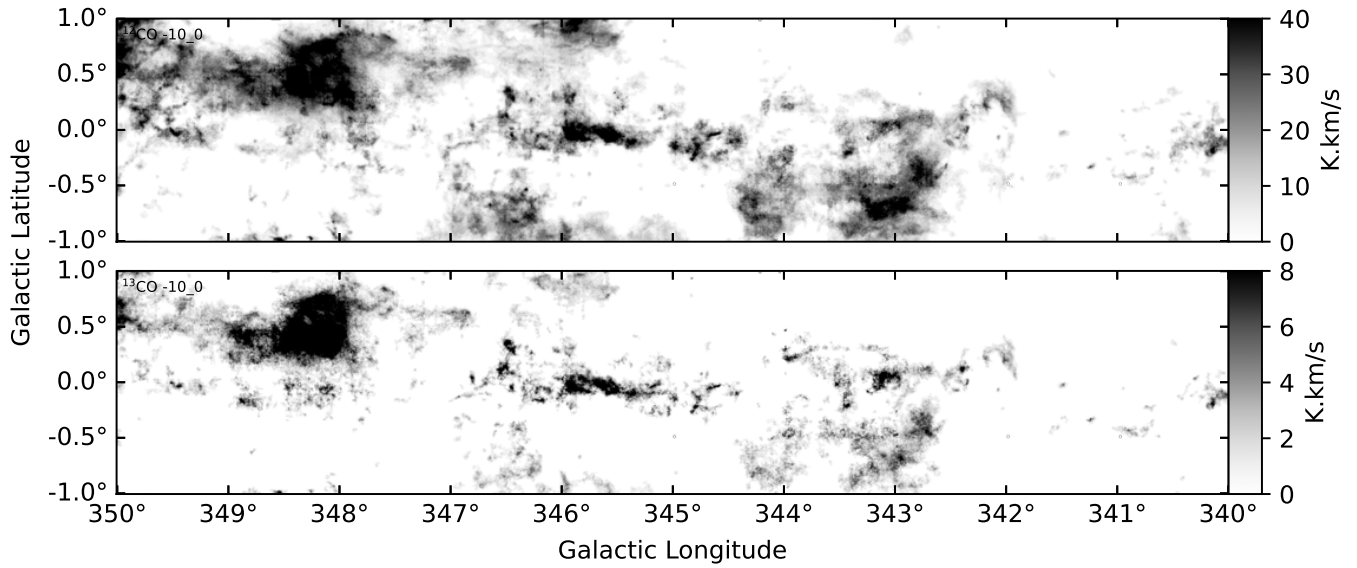

**Figure 135.** Moment 0 image for  $l=340\text{-}350^\circ$  calculated over the velocity interval  $v=-10$  to  $0\text{ km s}^{-1}$  using the main beam intensity,  $T_{MB}$ . The grayscale  $^{12}\text{CO}$  runs from 0 to 40 K.km/s, while the  $^{13}\text{CO}$  from 0 to 8 K.km/s.

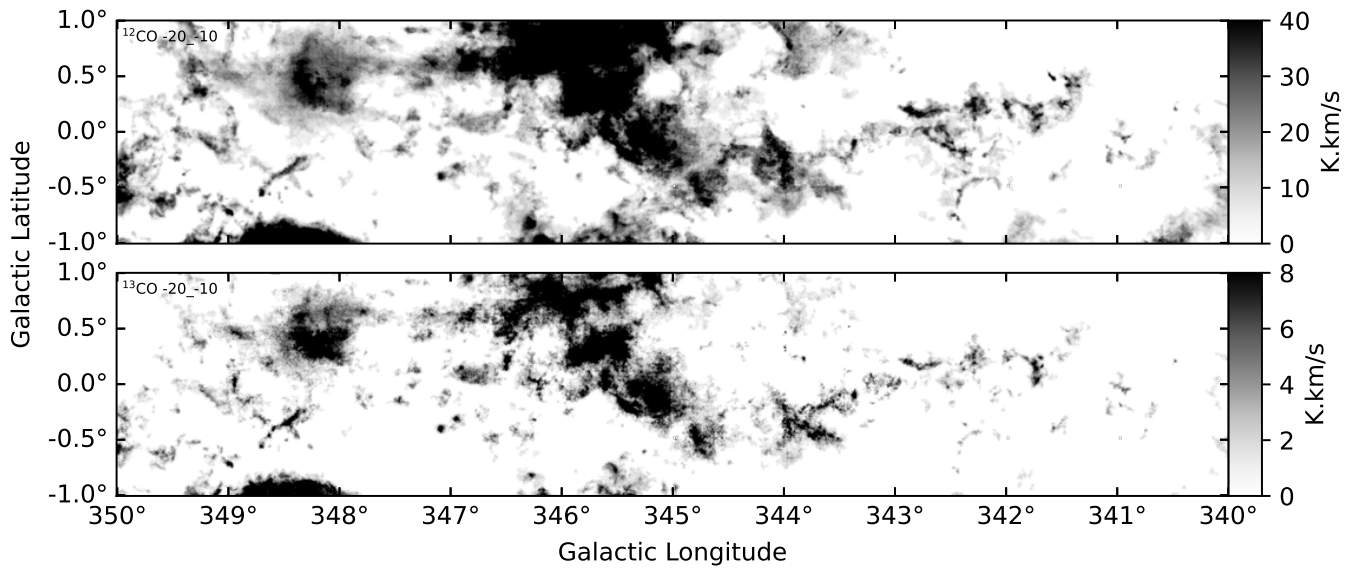

**Figure 136.** Moment 0 image for  $l=340\text{-}350^\circ$  calculated over the velocity interval  $v=-20$  to  $-10\text{ km s}^{-1}$  using the main beam intensity,  $T_{MB}$ . The grayscale  $^{12}\text{CO}$  runs from 0 to 40 K.km/s, while the  $^{13}\text{CO}$  from 0 to 8 K.km/s.

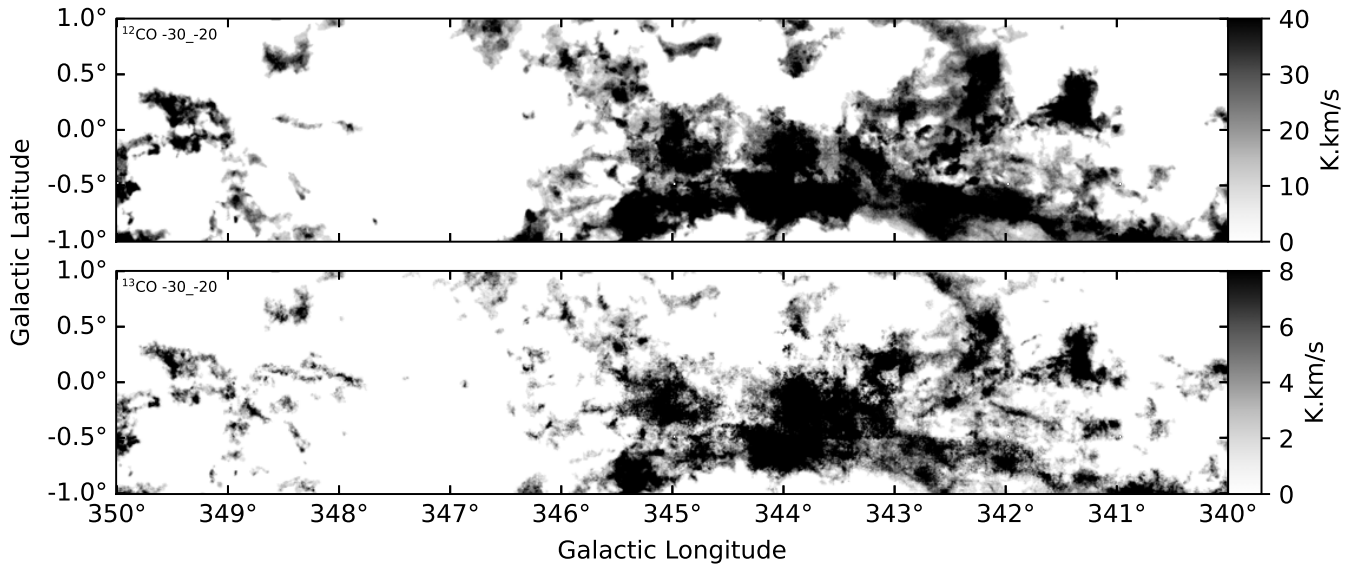

**Figure 137.** Moment 0 image for  $l=340\text{-}350^\circ$  calculated over the velocity interval  $v=-30$  to  $-20$  km  $\text{s}^{-1}$  using the main beam intensity,  $T_{MB}$ . The grayscale  $^{12}\text{CO}$  runs from 0 to 40 K.km/s, while the  $^{13}\text{CO}$  from 0 to 8 K.km/s.

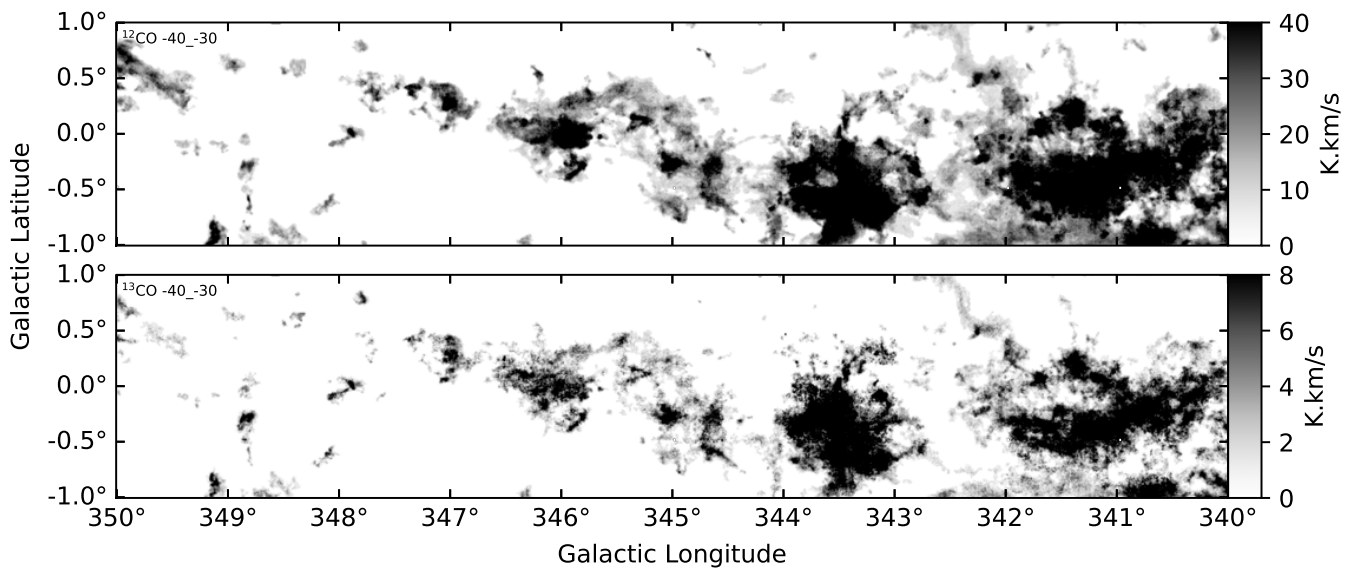

**Figure 138.** Moment 0 image for  $l=340\text{-}350^\circ$  calculated over the velocity interval  $v=-40$  to  $-30$  km  $\text{s}^{-1}$  using the main beam intensity,  $T_{MB}$ . The grayscale  $^{12}\text{CO}$  runs from 0 to 40 K.km/s, while the  $^{13}\text{CO}$  from 0 to 8 K.km/s.

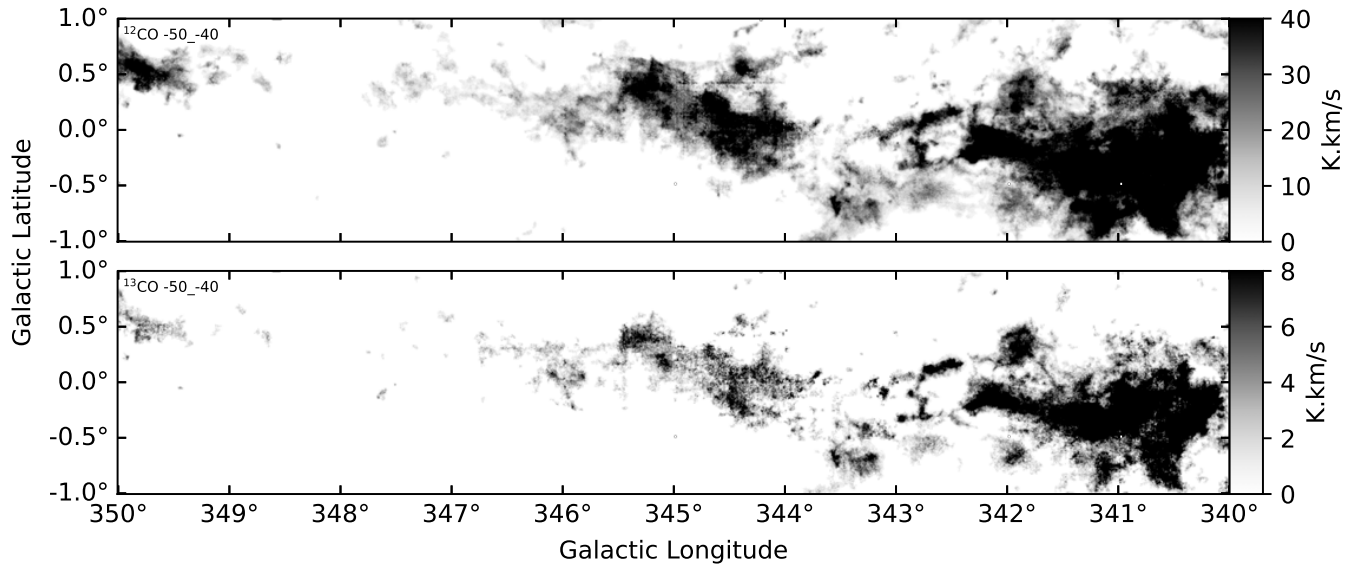

**Figure 139.** Moment 0 image for  $l=340\text{-}350^\circ$  calculated over the velocity interval  $v=-50$  to  $-40\text{ km s}^{-1}$  using the main beam intensity,  $T_{MB}$ . The grayscale  $^{12}\text{CO}$  runs from 0 to 40 K.km/s, while the  $^{13}\text{CO}$  from 0 to 8 K.km/s.

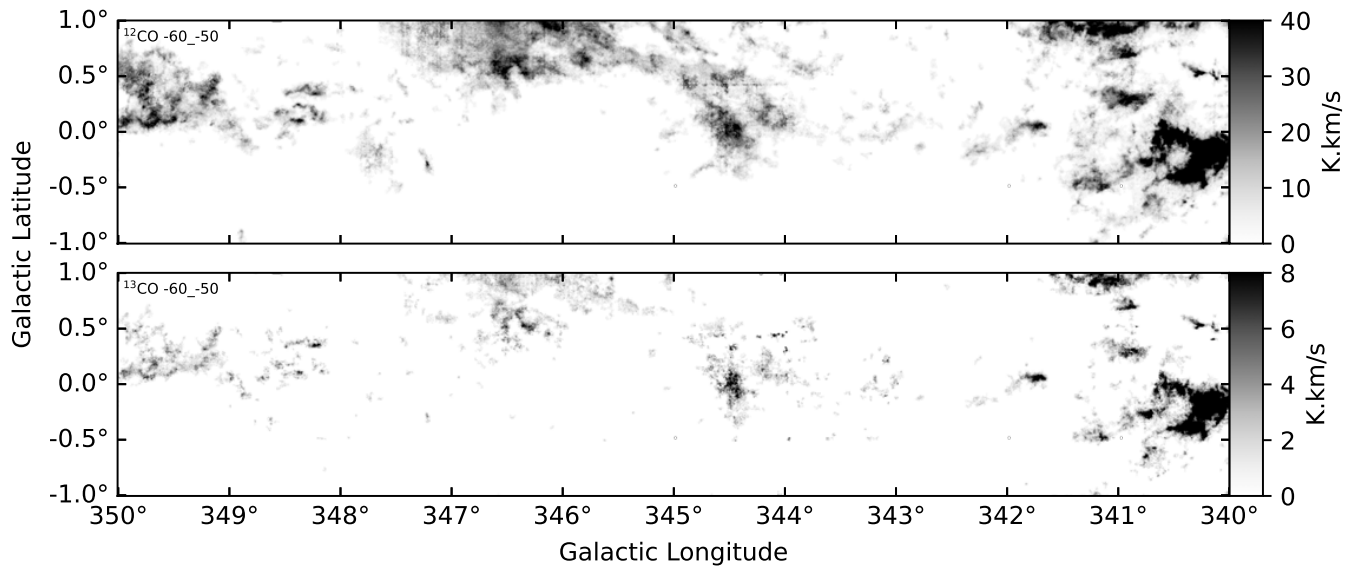

**Figure 140.** Moment 0 image for  $l=340\text{-}350^\circ$  calculated over the velocity interval  $v=-60$  to  $-50\text{ km s}^{-1}$  using the main beam intensity,  $T_{MB}$ . The grayscale  $^{12}\text{CO}$  runs from 0 to 40 K.km/s, while the  $^{13}\text{CO}$  from 0 to 8 K.km/s.

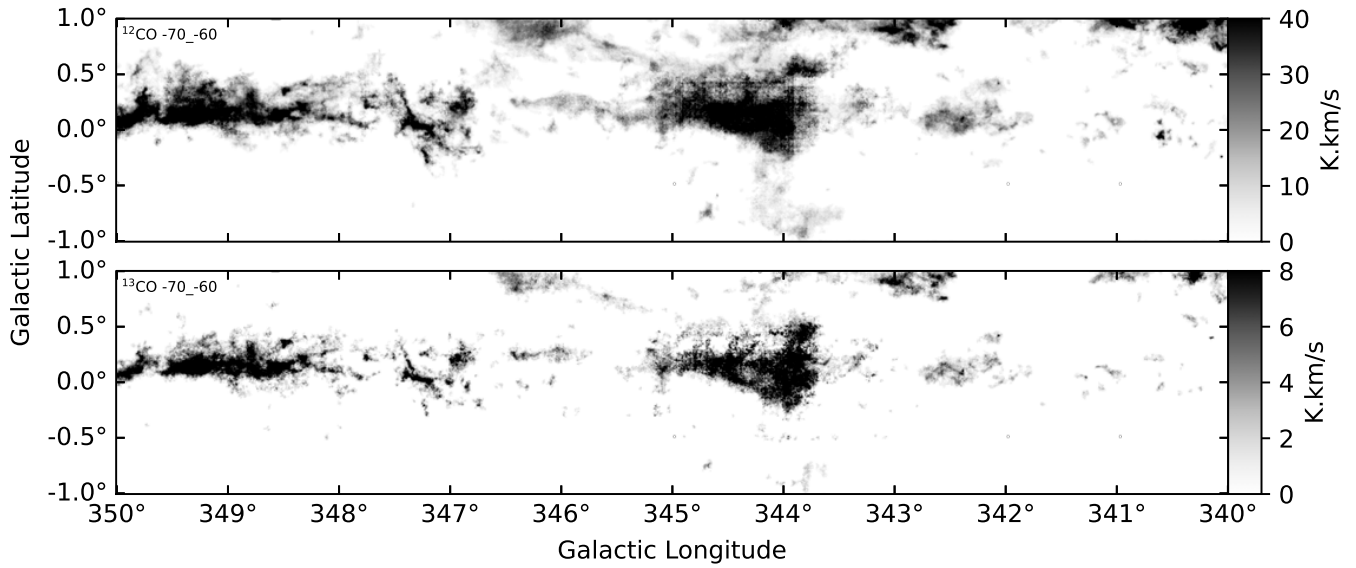

**Figure 141.** Moment 0 image for  $l=340\text{-}350^\circ$  calculated over the velocity interval  $v=-70$  to  $-60$  km  $\text{s}^{-1}$  using the main beam intensity,  $T_{MB}$ . The grayscale  $^{12}\text{CO}$  runs from 0 to 40 K.km/s, while the  $^{13}\text{CO}$  from 0 to 8 K.km/s.

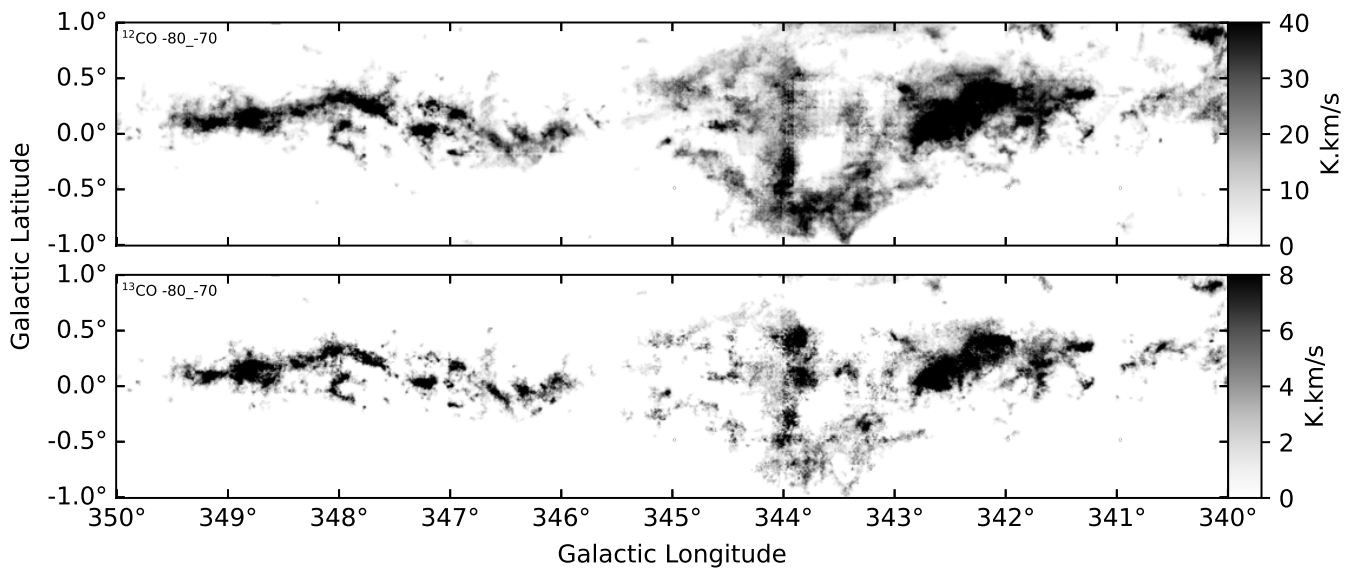

**Figure 142.** Moment 0 image for  $l=340\text{-}350^\circ$  calculated over the velocity interval  $v=-80$  to  $-70$  km  $\text{s}^{-1}$  using the main beam intensity,  $T_{MB}$ . The grayscale  $^{12}\text{CO}$  runs from 0 to 40 K.km/s, while the  $^{13}\text{CO}$  from 0 to 8 K.km/s.

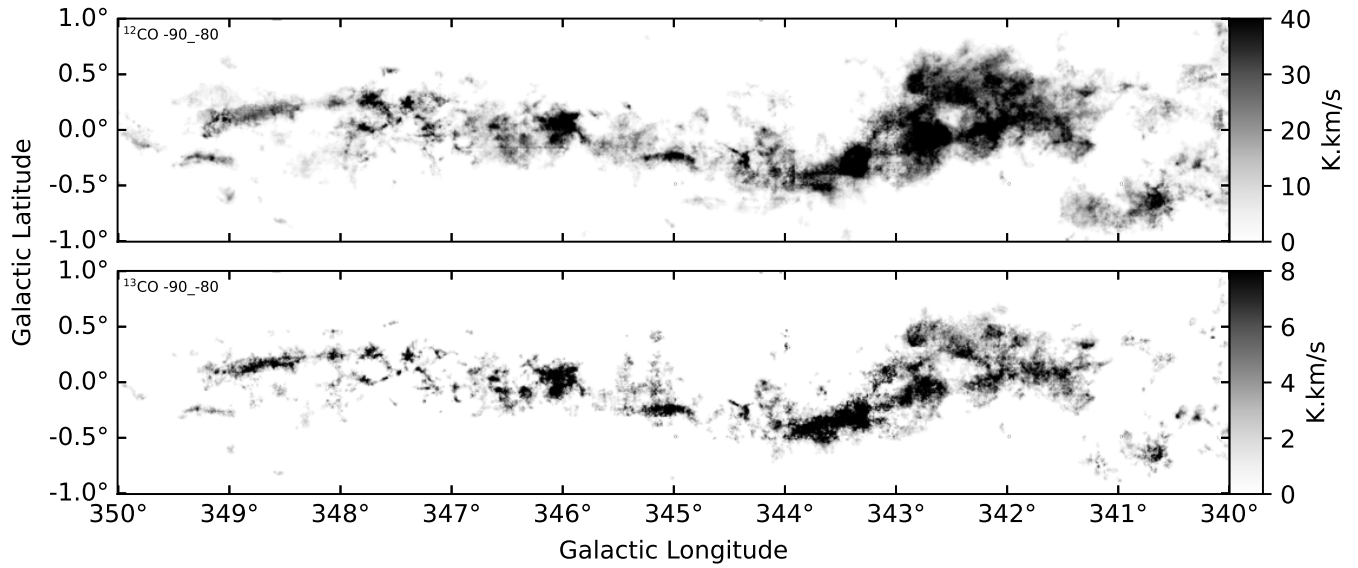

**Figure 143.** Moment 0 image for  $l=340\text{-}350^\circ$  calculated over the velocity interval  $v=-90$  to  $-80$  km  $\text{s}^{-1}$  using the main beam intensity,  $T_{MB}$ . The grayscale  $^{12}\text{CO}$  runs from 0 to 40 K.km/s, while the  $^{13}\text{CO}$  from 0 to 8 K.km/s.

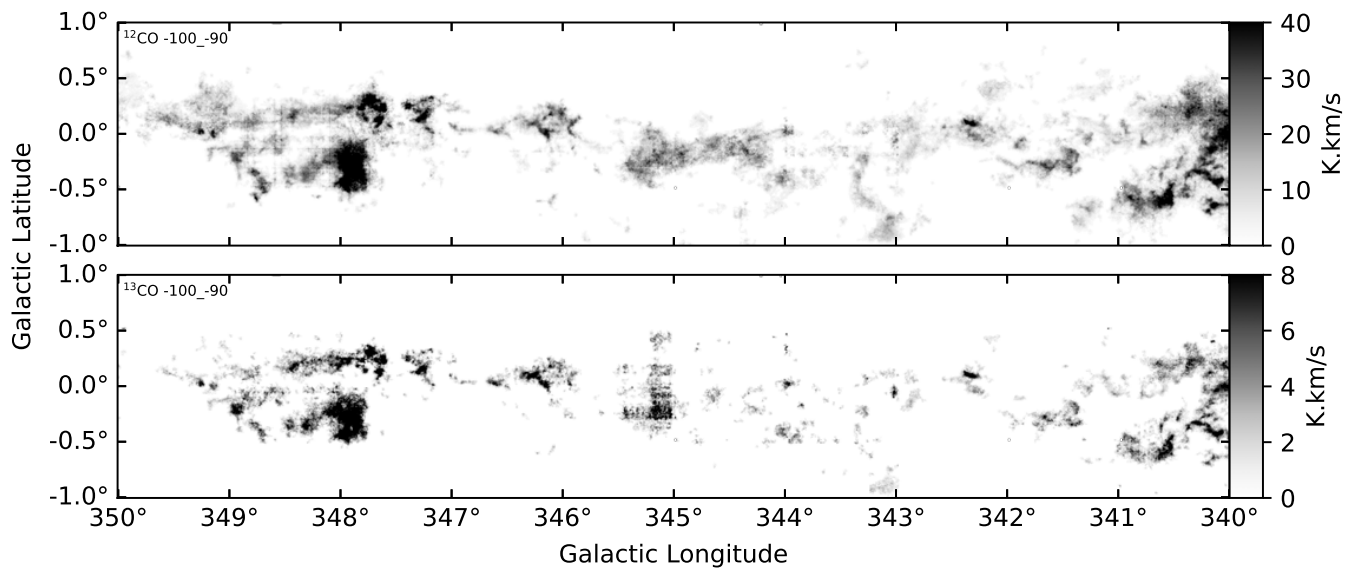

**Figure 144.** Moment 0 image for  $l=340\text{-}350^\circ$  calculated over the velocity interval  $v=-100$  to  $-90$  km  $\text{s}^{-1}$  using the main beam intensity,  $T_{MB}$ . The grayscale  $^{12}\text{CO}$  runs from 0 to 40 K.km/s, while the  $^{13}\text{CO}$  from 0 to 8 K.km/s.

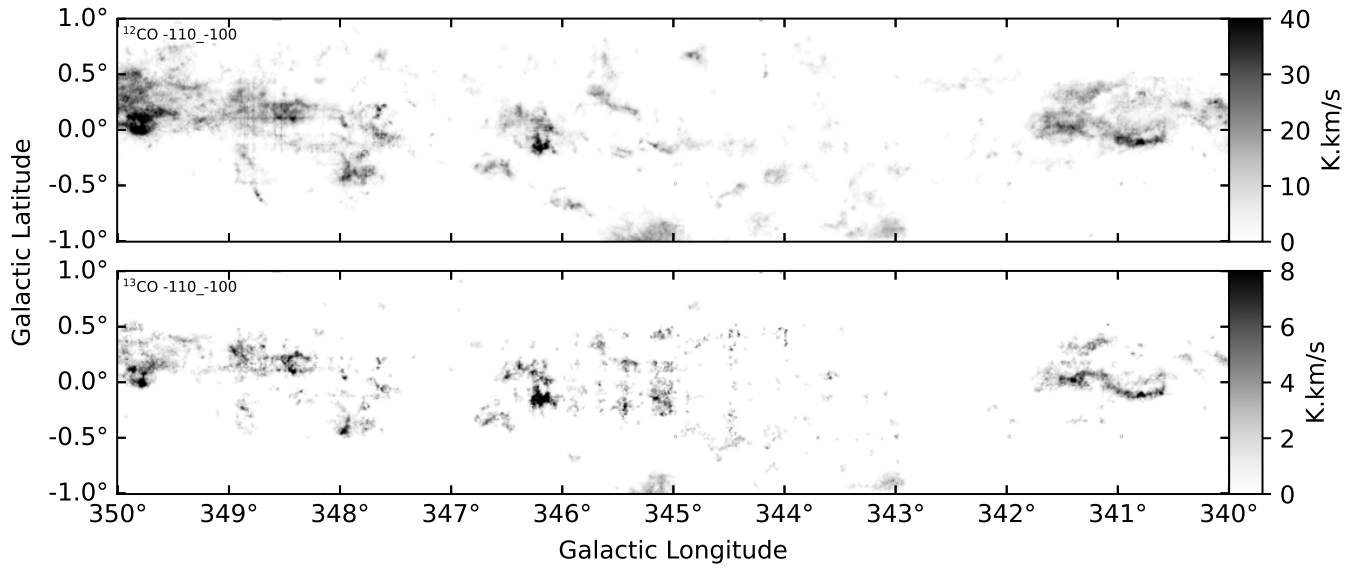

**Figure 145.** Moment 0 image for  $l=340-350^\circ$  calculated over the velocity interval  $v=-110$  to  $-100 \text{ km s}^{-1}$  using the main beam intensity,  $T_{MB}$ . The grayscale  $^{12}\text{CO}$  runs from 0 to 40 K.km/s, while the  $^{13}\text{CO}$  from 0 to 8 K.km/s.

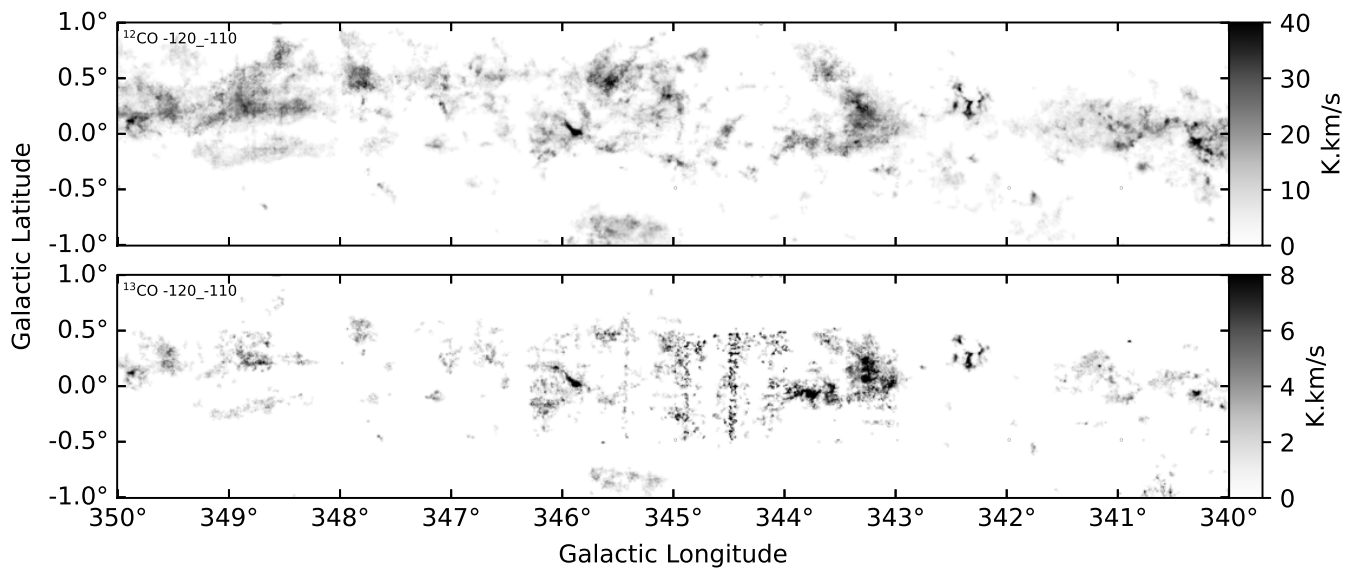

**Figure 146.** Moment 0 image for  $l=340-350^\circ$  calculated over the velocity interval  $v=-120$  to  $-110 \text{ km s}^{-1}$  using the main beam intensity,  $T_{MB}$ . The grayscale  $^{12}\text{CO}$  runs from 0 to 40 K.km/s, while the  $^{13}\text{CO}$  from 0 to 8 K.km/s.

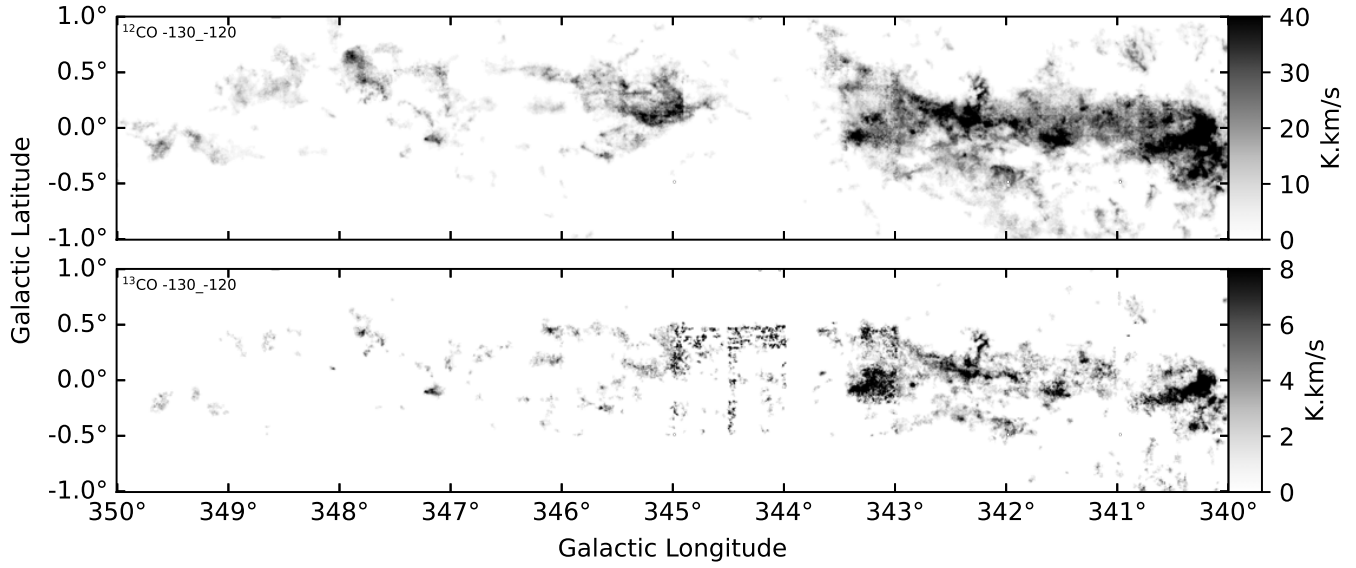

**Figure 147.** Moment 0 image for  $l=340\text{-}350^\circ$  calculated over the velocity interval  $v=-130$  to  $-120$   $\text{km s}^{-1}$  using the main beam intensity,  $T_{MB}$ . The grayscale  $^{12}\text{CO}$  runs from 0 to 40 K.km/s, while the  $^{13}\text{CO}$  from 0 to 8 K.km/s.

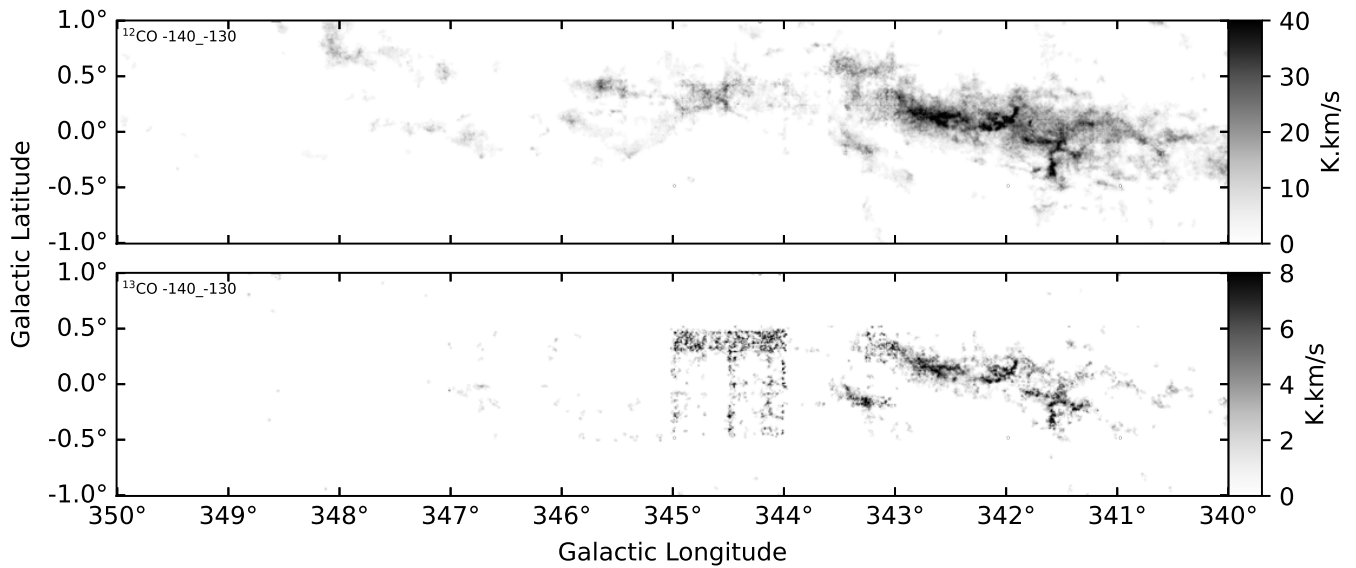

**Figure 148.** Moment 0 image for  $l=340\text{-}350^\circ$  calculated over the velocity interval  $v=-140$  to  $-130$   $\text{km s}^{-1}$  using the main beam intensity,  $T_{MB}$ . The grayscale  $^{12}\text{CO}$  runs from 0 to 40 K.km/s, while the  $^{13}\text{CO}$  from 0 to 8 K.km/s.



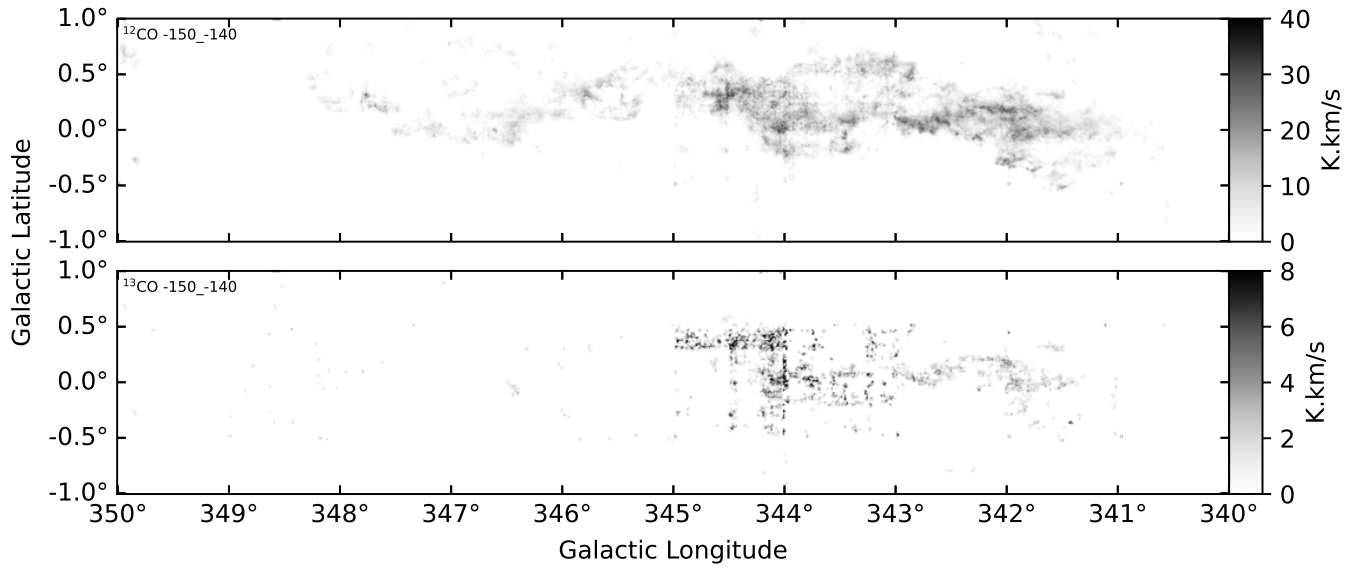

**Figure 149.** Moment 0 image for  $l=340\text{--}350^\circ$  calculated over the velocity interval  $v=-150$  to  $-140\text{ km s}^{-1}$  using the main beam intensity,  $T_{MB}$ . The grayscale  $^{12}\text{CO}$  runs from 0 to 40 K.km/s, while the  $^{13}\text{CO}$  from 0 to 8 K.km/s.

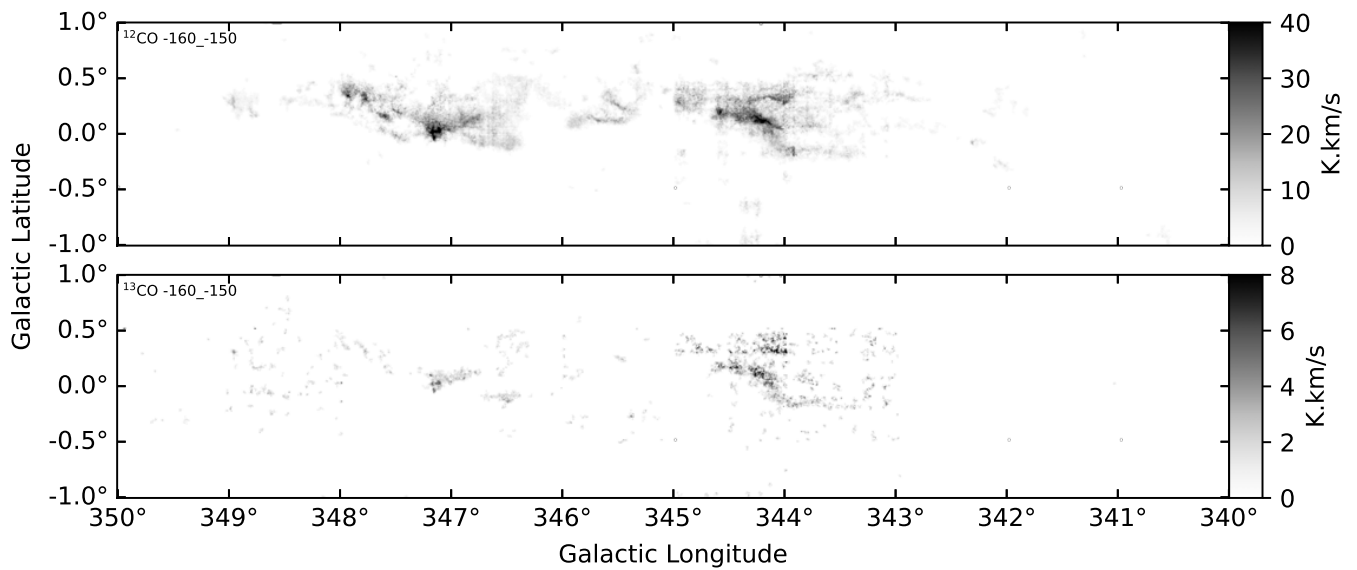

**Figure 150.** Moment 0 image for  $l=340\text{--}350^\circ$  calculated over the velocity interval  $v=-160$  to  $-150\text{ km s}^{-1}$  using the main beam intensity,  $T_{MB}$ . The grayscale  $^{12}\text{CO}$  runs from 0 to 40 K.km/s, while the  $^{13}\text{CO}$  from 0 to 8 K.km/s.

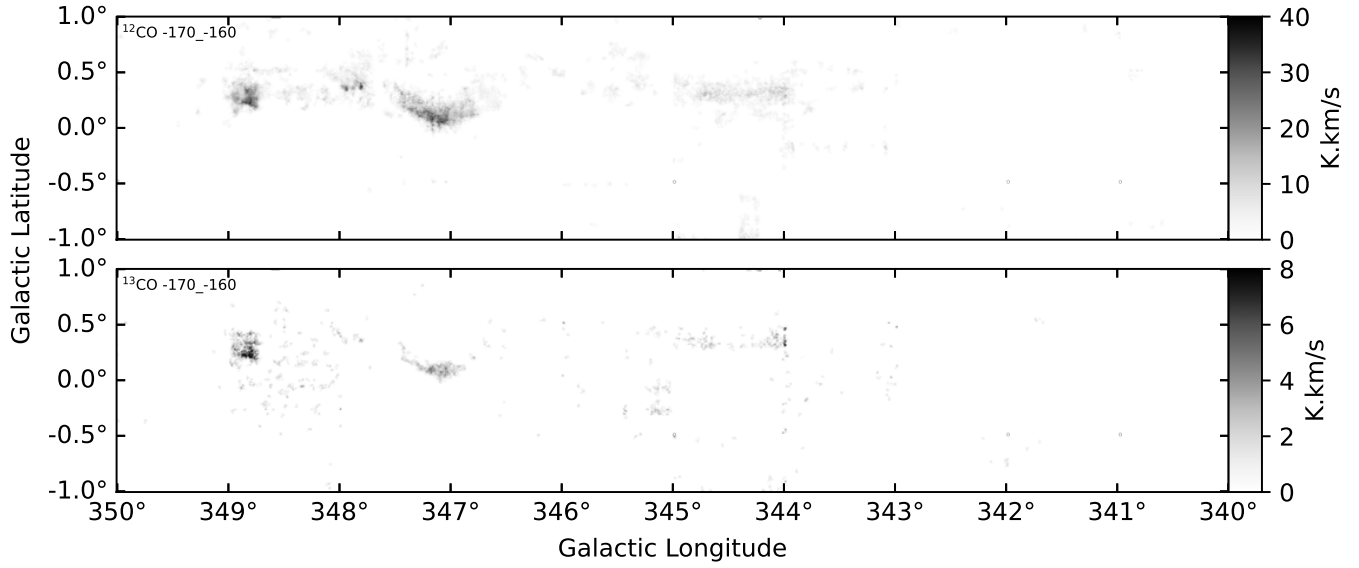

**Figure 151.** Moment 0 image for  $l=340\text{-}350^\circ$  calculated over the velocity interval  $v=-170$  to  $-160$  km  $\text{s}^{-1}$  using the main beam intensity,  $T_{MB}$ . The grayscale  $^{12}\text{CO}$  runs from 0 to 40 K.km/s, while the  $^{13}\text{CO}$  from 0 to 8 K.km/s.

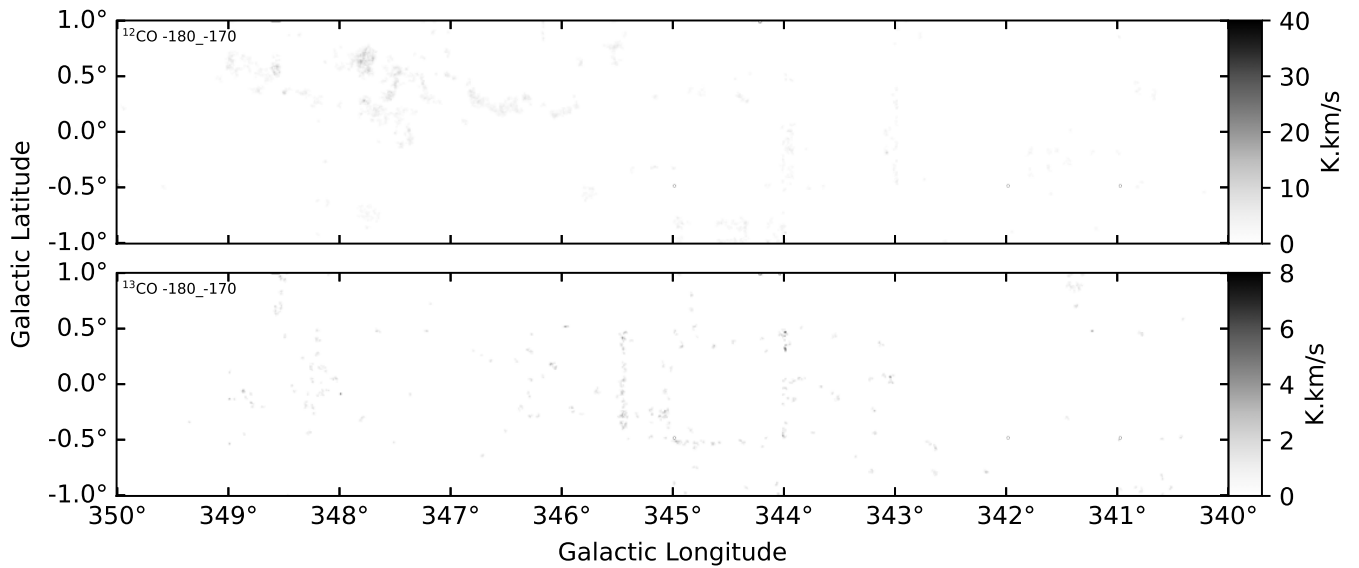

**Figure 152.** Moment 0 image for  $l=340\text{-}350^\circ$  calculated over the velocity interval  $v=-180$  to  $-170$  km  $\text{s}^{-1}$  using the main beam intensity,  $T_{MB}$ . The grayscale  $^{12}\text{CO}$  runs from 0 to 40 K.km/s, while the  $^{13}\text{CO}$  from 0 to 8 K.km/s.

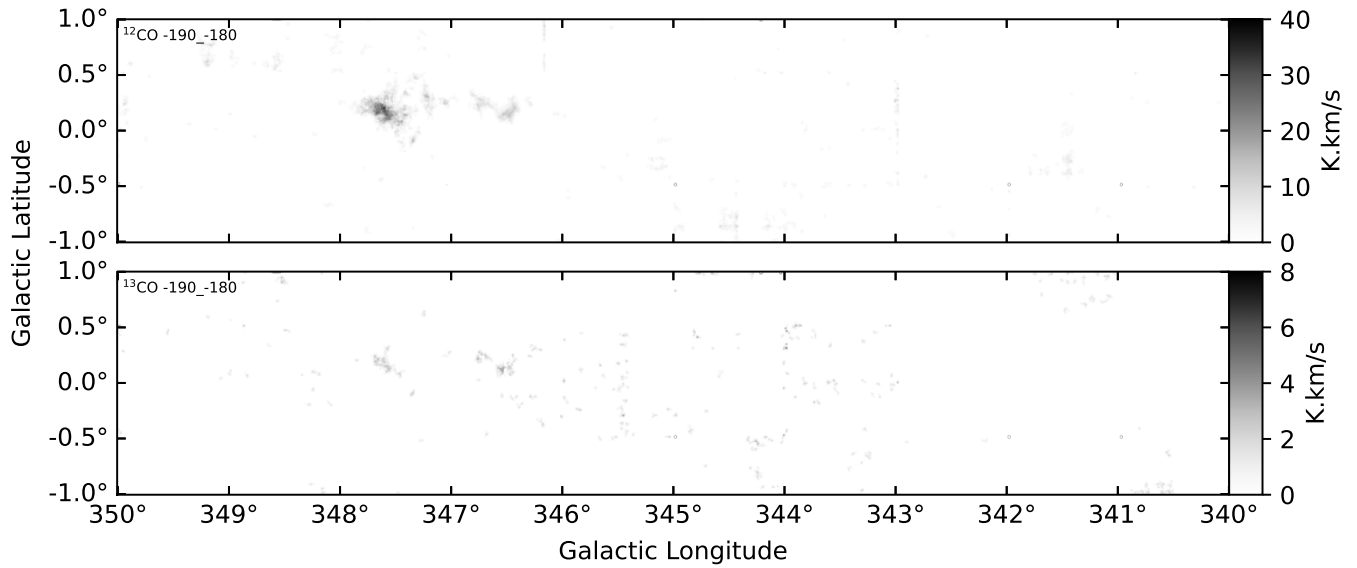

**Figure 153.** Moment 0 image for  $l=340\text{-}350^\circ$  calculated over the velocity interval  $v=-190$  to  $-180\text{ km s}^{-1}$  using the main beam intensity,  $T_{MB}$ . The grayscale  $^{12}\text{CO}$  runs from 0 to 40 K.km/s, while the  $^{13}\text{CO}$  from 0 to 8 K.km/s.

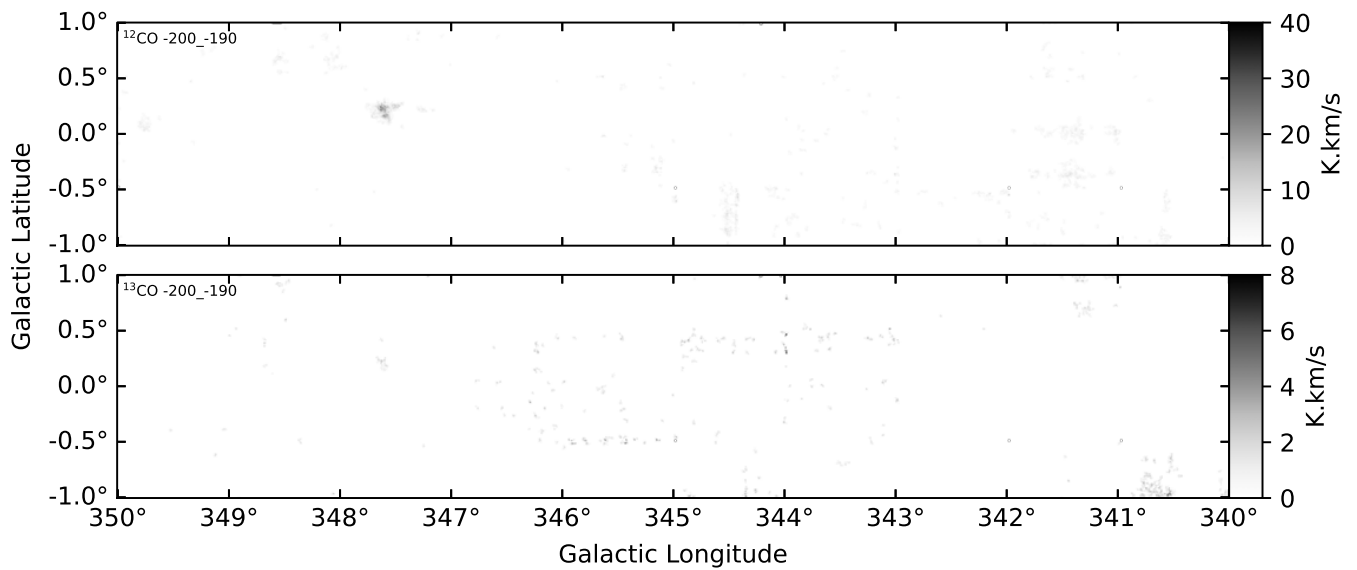

**Figure 154.** Moment 0 image for  $l=340\text{-}350^\circ$  calculated over the velocity interval  $v=-200$  to  $-190\text{ km s}^{-1}$  using the main beam intensity,  $T_{MB}$ . The grayscale  $^{12}\text{CO}$  runs from 0 to 40 K.km/s, while the  $^{13}\text{CO}$  from 0 to 8 K.km/s.

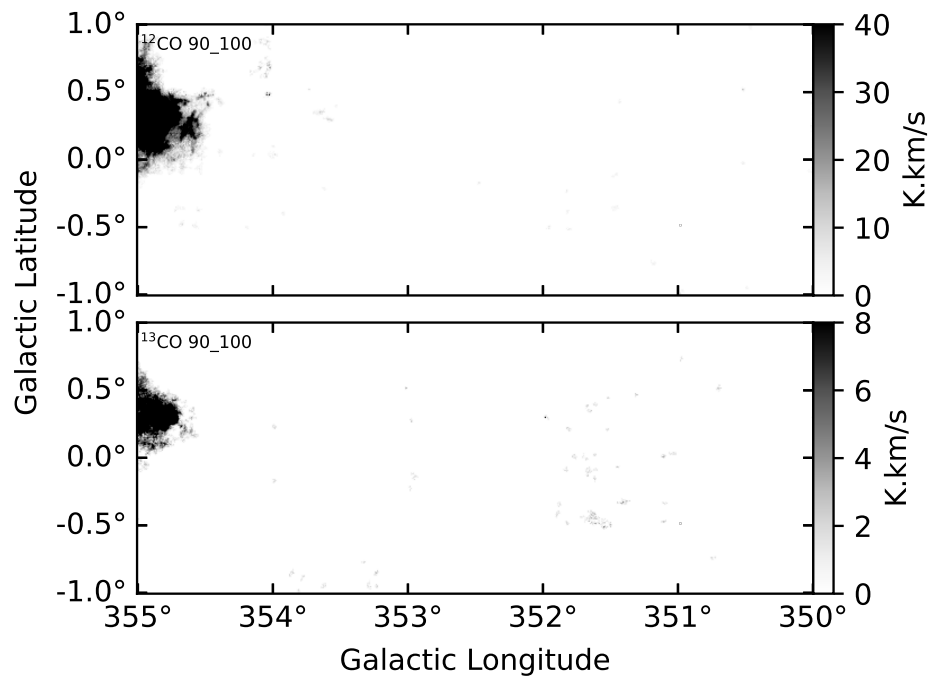

**Figure 155.** Moment 0 image for  $l=350\text{--}355^\circ$  calculated over the velocity interval  $v=90$  to  $100 \text{ km s}^{-1}$  using the main beam intensity,  $T_{MB}$ . The grayscale  $^{12}\text{CO}$  runs from 0 to 40  $\text{K.km/s}$ , while the  $^{13}\text{CO}$  from 0 to 8  $\text{K.km/s}$ .

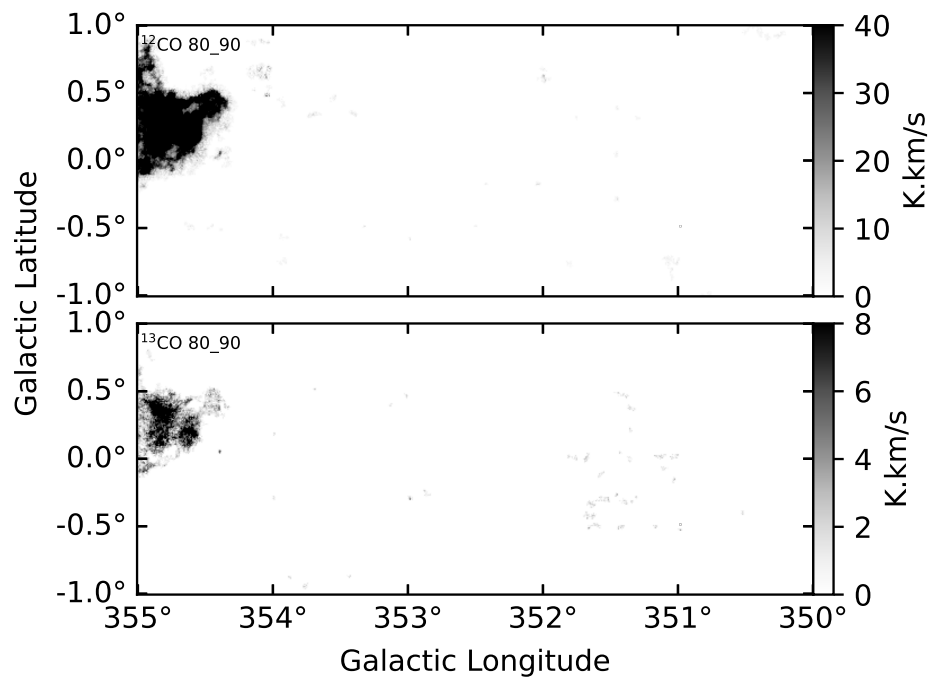

**Figure 156.** Moment 0 image for  $l=350\text{--}355^\circ$  calculated over the velocity interval  $v=80$  to  $90 \text{ km s}^{-1}$  using the main beam intensity,  $T_{MB}$ . The grayscale  $^{12}\text{CO}$  runs from 0 to 40  $\text{K.km/s}$ , while the  $^{13}\text{CO}$  from 0 to 8  $\text{K.km/s}$ .

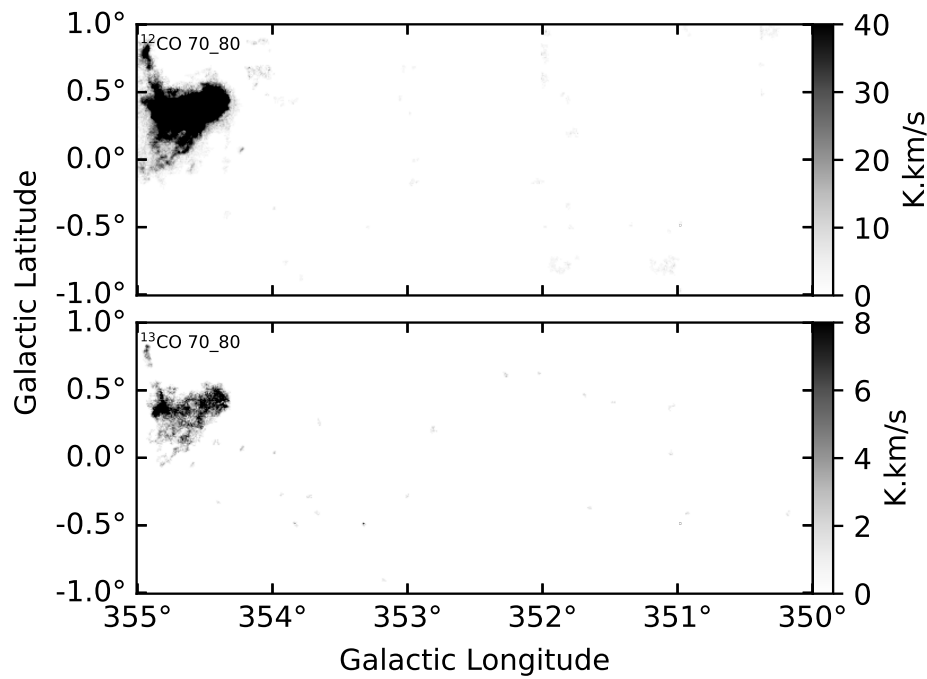

**Figure 157.** Moment 0 image for  $l=350\text{-}355^\circ$  calculated over the velocity interval  $v=70$  to  $80 \text{ km s}^{-1}$  using the main beam intensity,  $T_{MB}$ . The grayscale  $^{12}\text{CO}$  runs from 0 to 40 K.km/s, while the  $^{13}\text{CO}$  from 0 to 8 K.km/s.

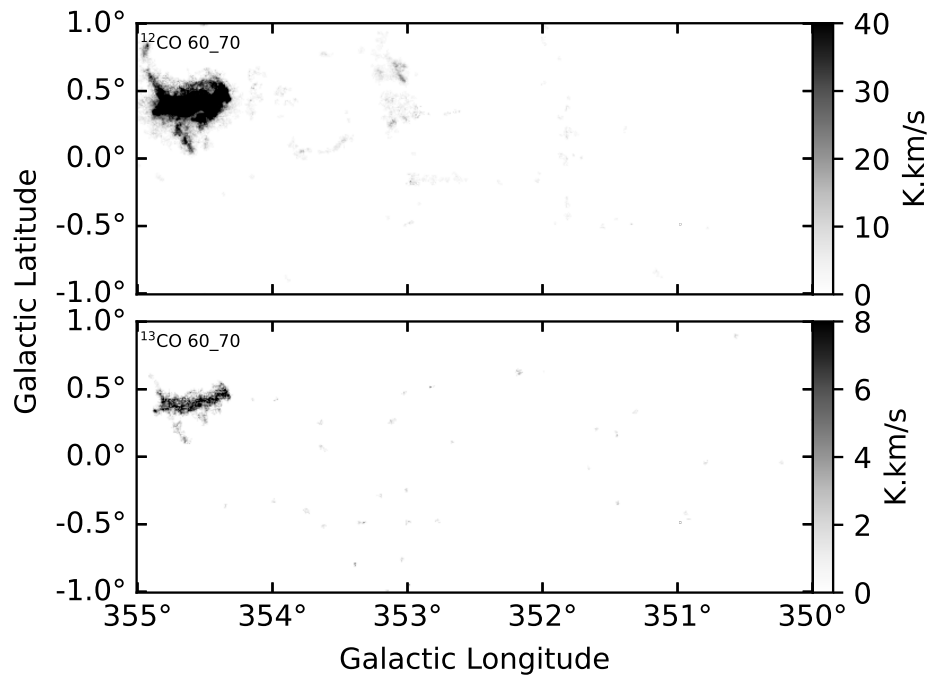

**Figure 158.** Moment 0 image for  $l=350\text{-}355^\circ$  calculated over the velocity interval  $v=60$  to  $70 \text{ km s}^{-1}$  using the main beam intensity,  $T_{MB}$ . The grayscale  $^{12}\text{CO}$  runs from 0 to 40 K.km/s, while the  $^{13}\text{CO}$  from 0 to 8 K.km/s.

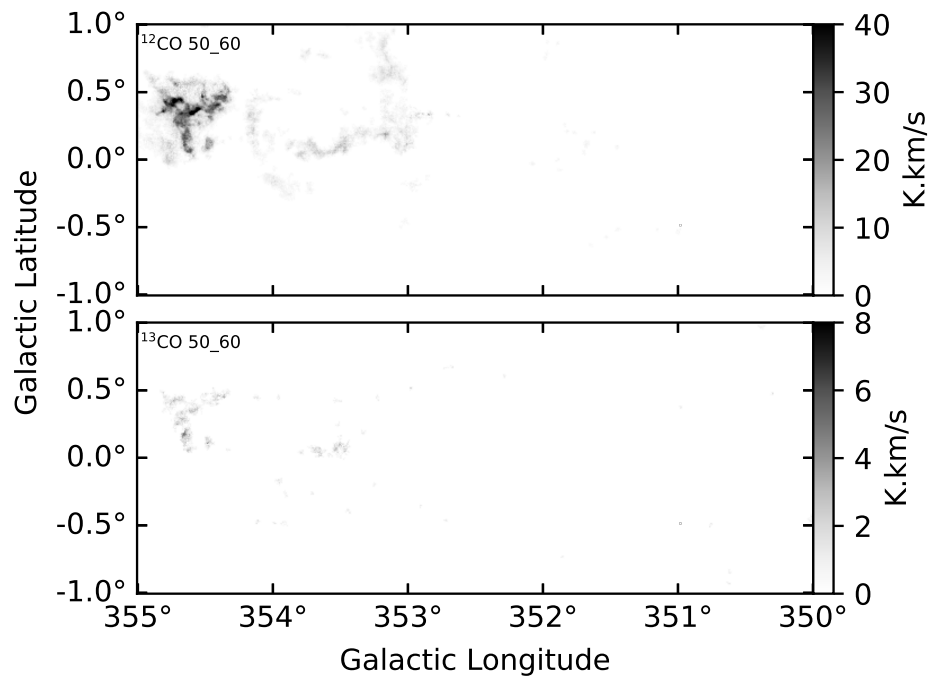

**Figure 159.** Moment 0 image for  $l=350-355^\circ$  calculated over the velocity interval  $v=50$  to  $60 \text{ km s}^{-1}$  using the main beam intensity,  $T_{MB}$ . The grayscale  $^{12}\text{CO}$  runs from 0 to 40 K.km/s, while the  $^{13}\text{CO}$  from 0 to 8 K.km/s.

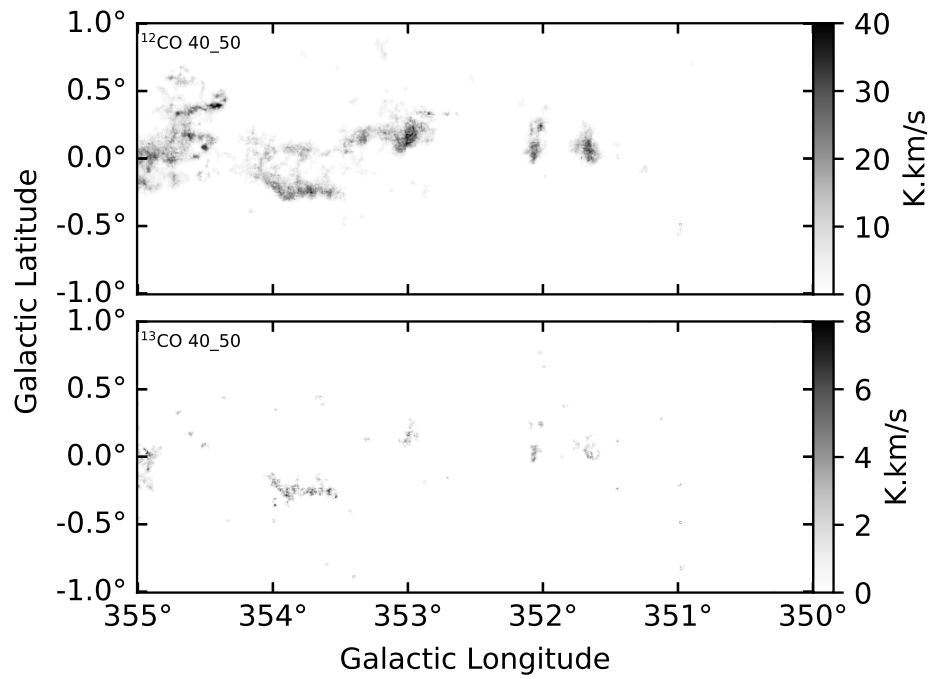

**Figure 160.** Moment 0 image for  $l=350-355^\circ$  calculated over the velocity interval  $v=40$  to  $50 \text{ km s}^{-1}$  using the main beam intensity,  $T_{MB}$ . The grayscale  $^{12}\text{CO}$  runs from 0 to 40 K.km/s, while the  $^{13}\text{CO}$  from 0 to 8 K.km/s.

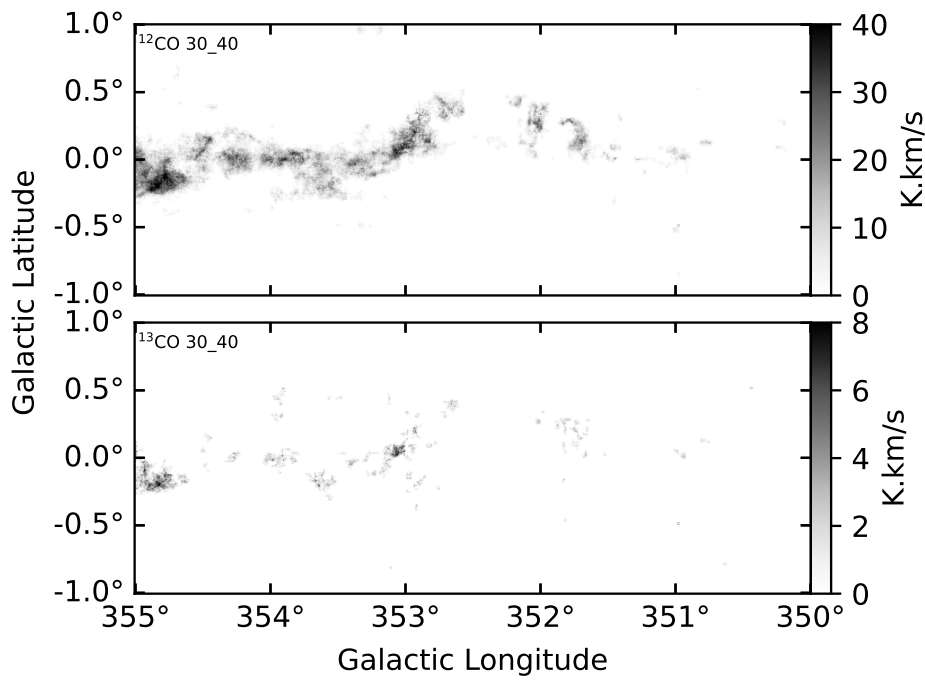

**Figure 161.** Moment 0 image for  $l=350\text{-}355^\circ$  calculated over the velocity interval  $v=30\text{ to }40\text{ km s}^{-1}$  using the main beam intensity,  $T_{MB}$ . The grayscale  $^{12}\text{CO}$  runs from 0 to 40  $\text{K.km/s}$ , while the  $^{13}\text{CO}$  from 0 to 8  $\text{K.km/s}$ .

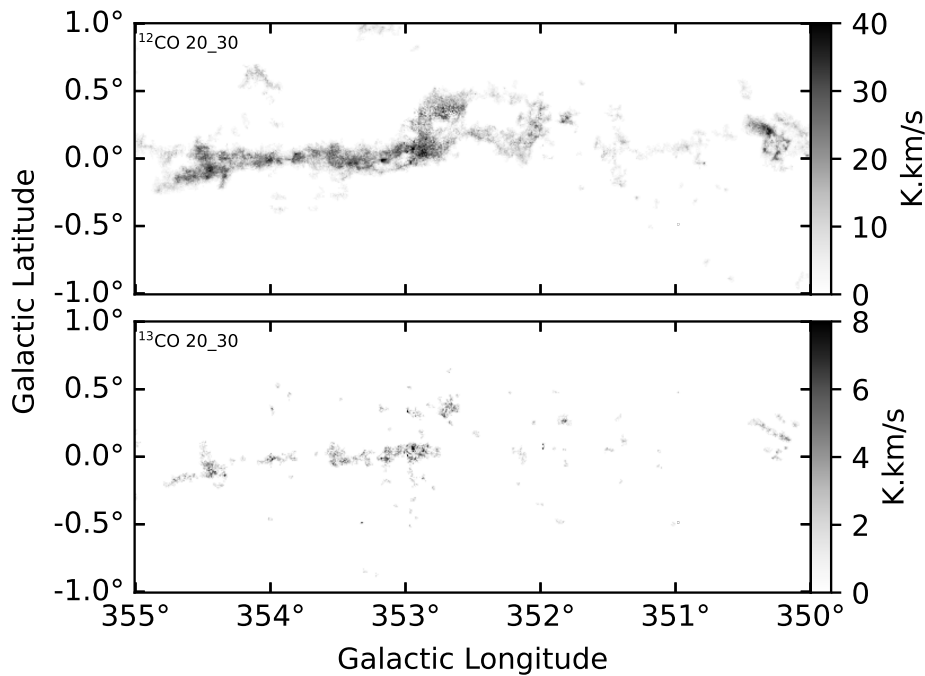

**Figure 162.** Moment 0 image for  $l=350\text{-}355^\circ$  calculated over the velocity interval  $v=20\text{ to }30\text{ km s}^{-1}$  using the main beam intensity,  $T_{MB}$ . The grayscale  $^{12}\text{CO}$  runs from 0 to 40  $\text{K.km/s}$ , while the  $^{13}\text{CO}$  from 0 to 8  $\text{K.km/s}$ .

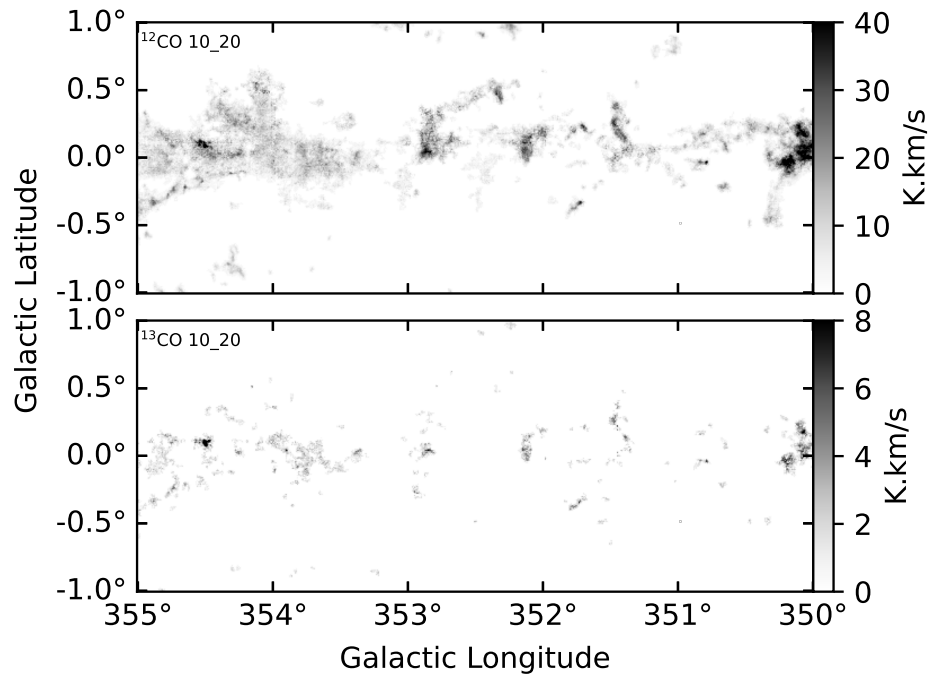

**Figure 163.** Moment 0 image for  $l=350-355^\circ$  calculated over the velocity interval  $v=10$  to  $20 \text{ km s}^{-1}$  using the main beam intensity,  $T_{MB}$ . The grayscale  $^{12}\text{CO}$  runs from 0 to 40 K.km/s, while the  $^{13}\text{CO}$  from 0 to 8 K.km/s.

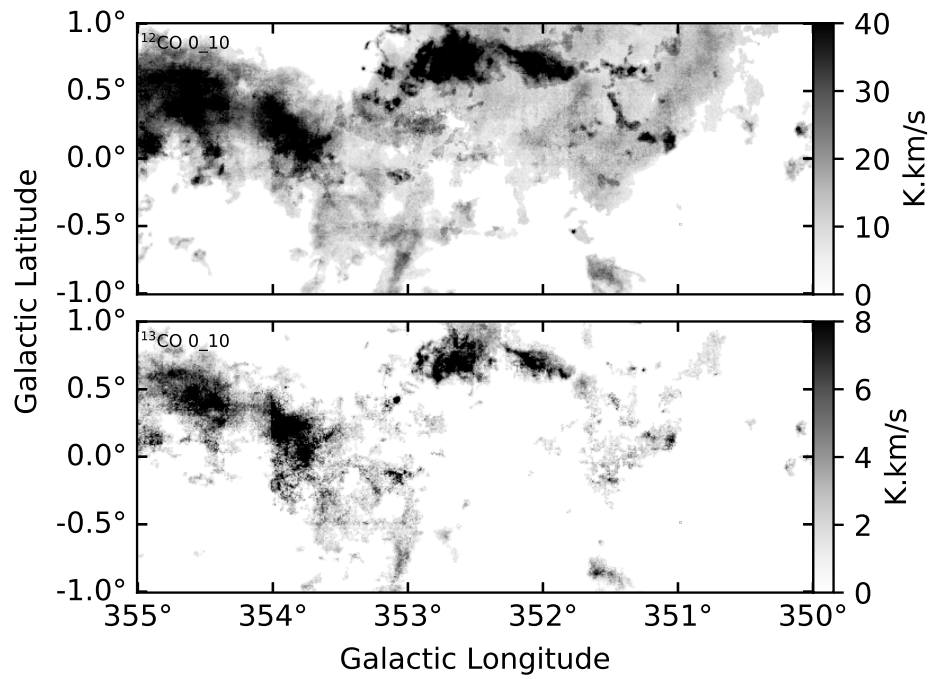

**Figure 164.** Moment 0 image for  $l=350-355^\circ$  calculated over the velocity interval  $v=0$  to  $10 \text{ km s}^{-1}$  using the main beam intensity,  $T_{MB}$ . The grayscale  $^{12}\text{CO}$  runs from 0 to 40 K.km/s, while the  $^{13}\text{CO}$  from 0 to 8 K.km/s.



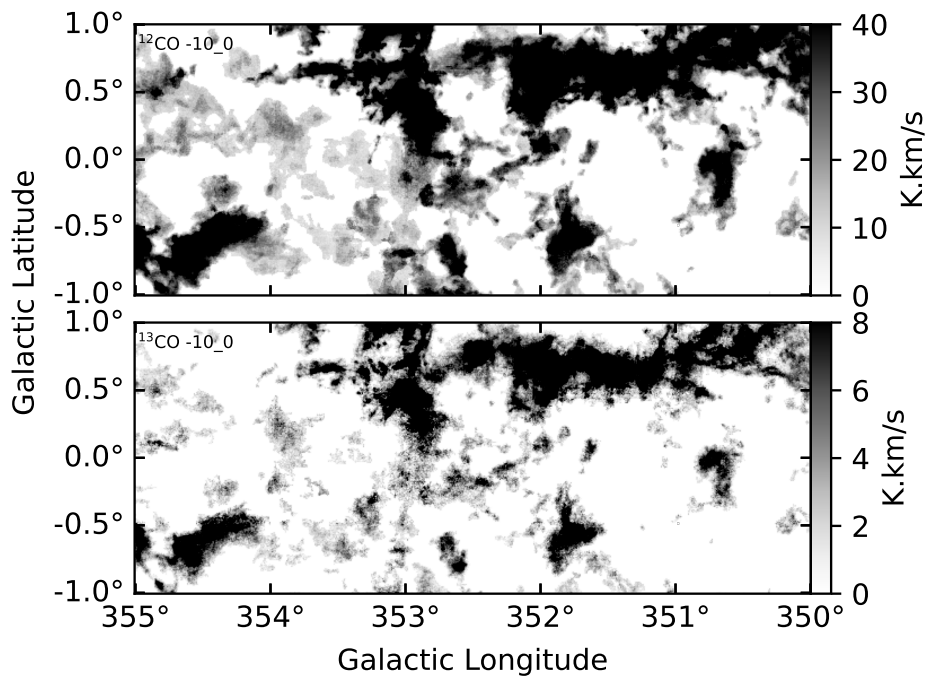

**Figure 165.** Moment 0 image for  $l=350-355^\circ$  calculated over the velocity interval  $v=-10$  to  $0 \text{ km s}^{-1}$  using the main beam intensity,  $T_{MB}$ . The grayscale  $^{12}\text{CO}$  runs from 0 to 40 K.km/s, while the  $^{13}\text{CO}$  from 0 to 8 K.km/s.

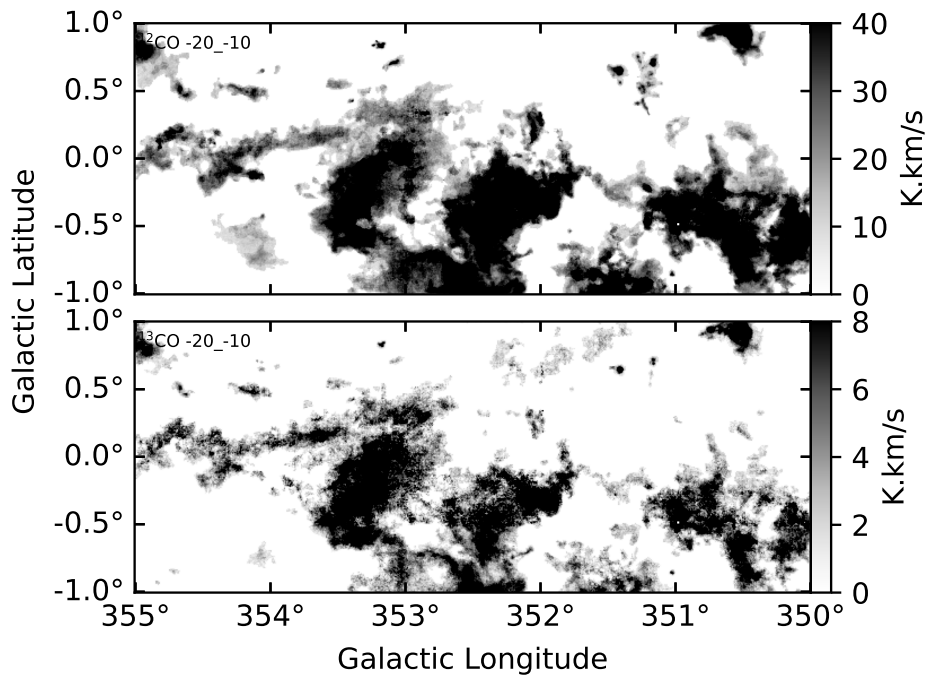

**Figure 166.** Moment 0 image for  $l=350-355^\circ$  calculated over the velocity interval  $v=-20$  to  $-10 \text{ km s}^{-1}$  using the main beam intensity,  $T_{MB}$ . The grayscale  $^{12}\text{CO}$  runs from 0 to 40 K.km/s, while the  $^{13}\text{CO}$  from 0 to 8 K.km/s.

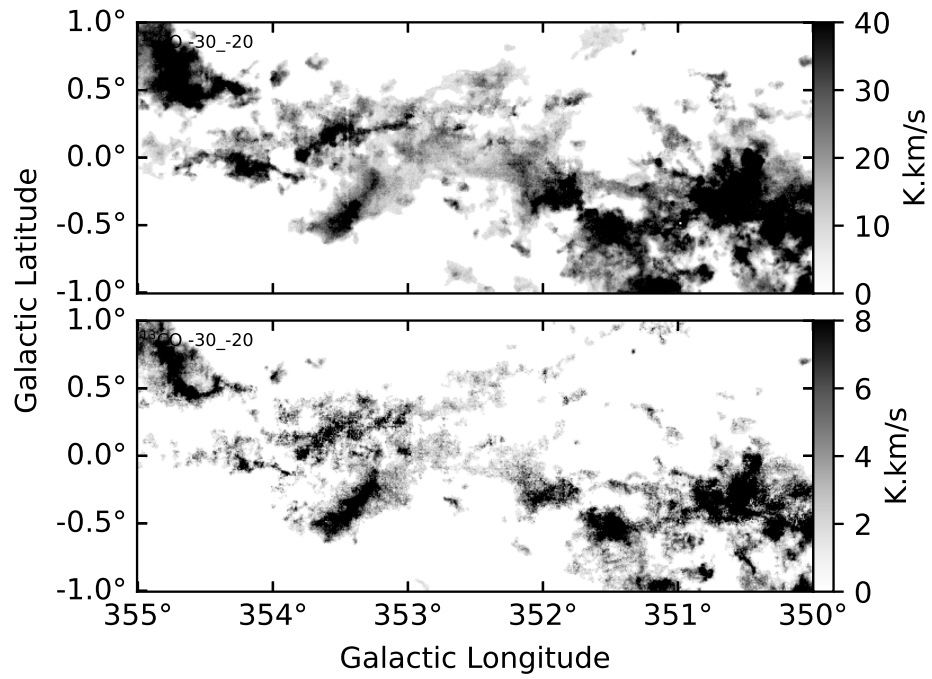

**Figure 167.** Moment 0 image for  $l=350-355^\circ$  calculated over the velocity interval  $v=-30$  to  $-20 \text{ km s}^{-1}$  using the main beam intensity,  $T_{MB}$ . The grayscale  $^{12}\text{CO}$  runs from 0 to 40 K.km/s, while the  $^{13}\text{CO}$  from 0 to 8 K.km/s.

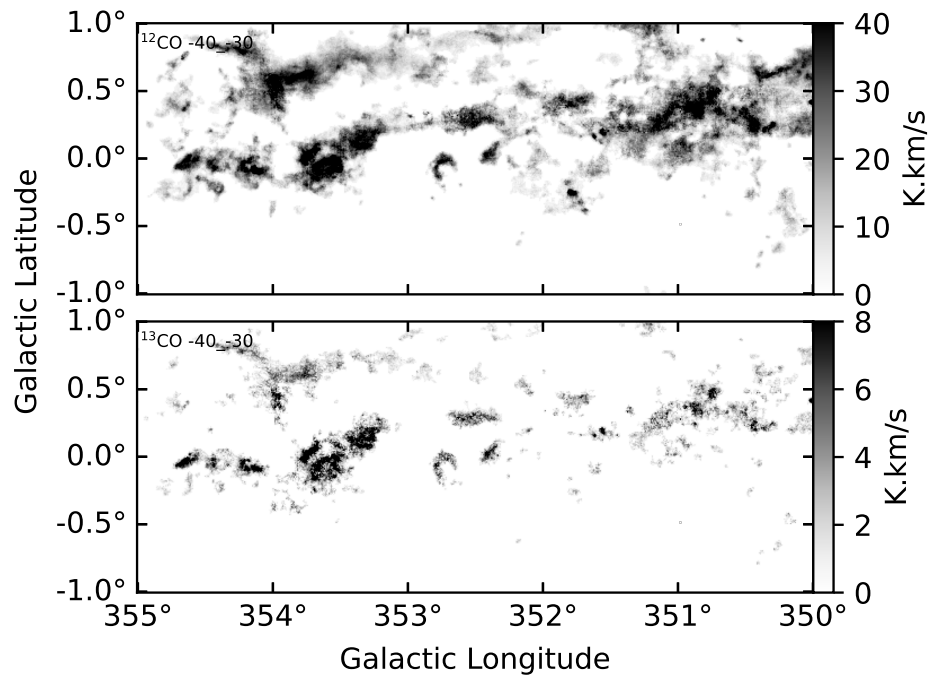

**Figure 168.** Moment 0 image for  $l=350-355^\circ$  calculated over the velocity interval  $v=-40$  to  $-30 \text{ km s}^{-1}$  using the main beam intensity,  $T_{MB}$ . The grayscale  $^{12}\text{CO}$  runs from 0 to 40 K.km/s, while the  $^{13}\text{CO}$  from 0 to 8 K.km/s.

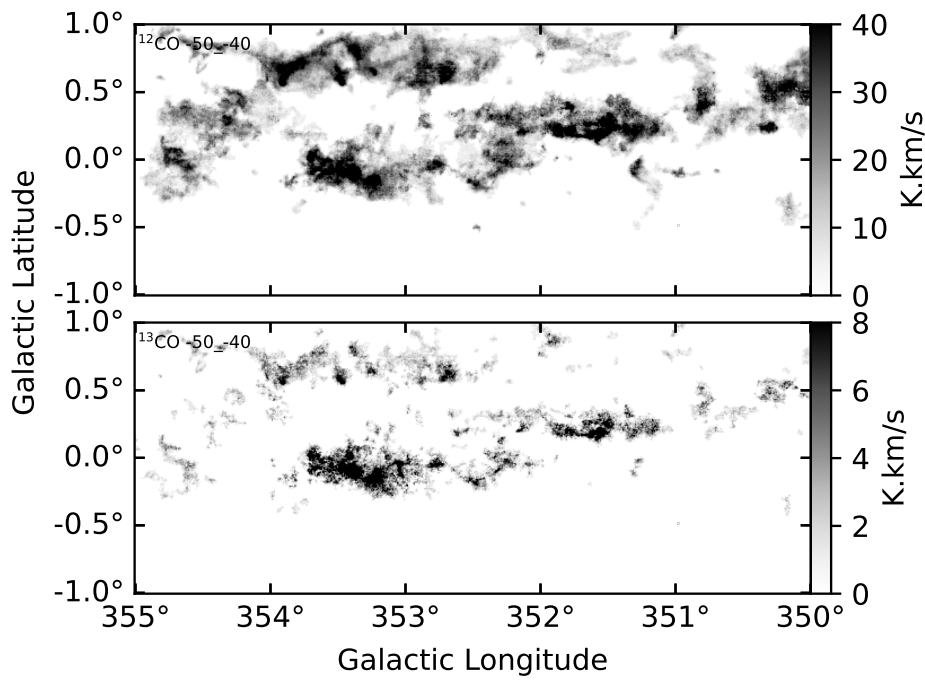

**Figure 169.** Moment 0 image for  $l=350\text{-}355^\circ$  calculated over the velocity interval  $v=-50$  to  $-40 \text{ km s}^{-1}$  using the main beam intensity,  $T_{MB}$ . The grayscale  $^{12}\text{CO}$  runs from 0 to 40  $\text{K.km/s}$ , while the  $^{13}\text{CO}$  from 0 to 8  $\text{K.km/s}$ .

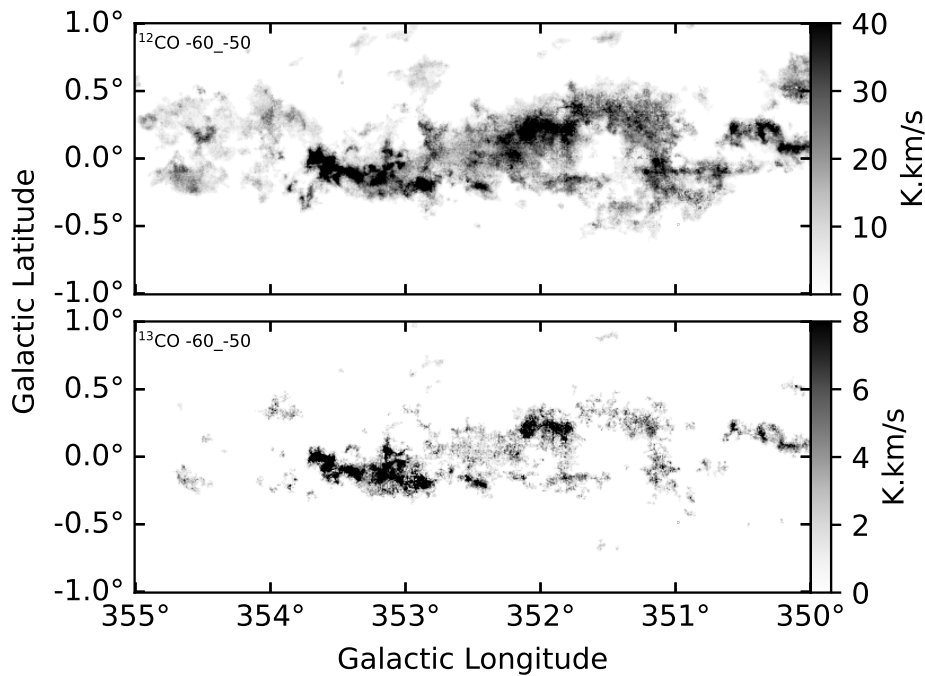

**Figure 170.** Moment 0 image for  $l=350\text{-}355^\circ$  calculated over the velocity interval  $v=-60$  to  $-50 \text{ km s}^{-1}$  using the main beam intensity,  $T_{MB}$ . The grayscale  $^{12}\text{CO}$  runs from 0 to 40  $\text{K.km/s}$ , while the  $^{13}\text{CO}$  from 0 to 8  $\text{K.km/s}$ .

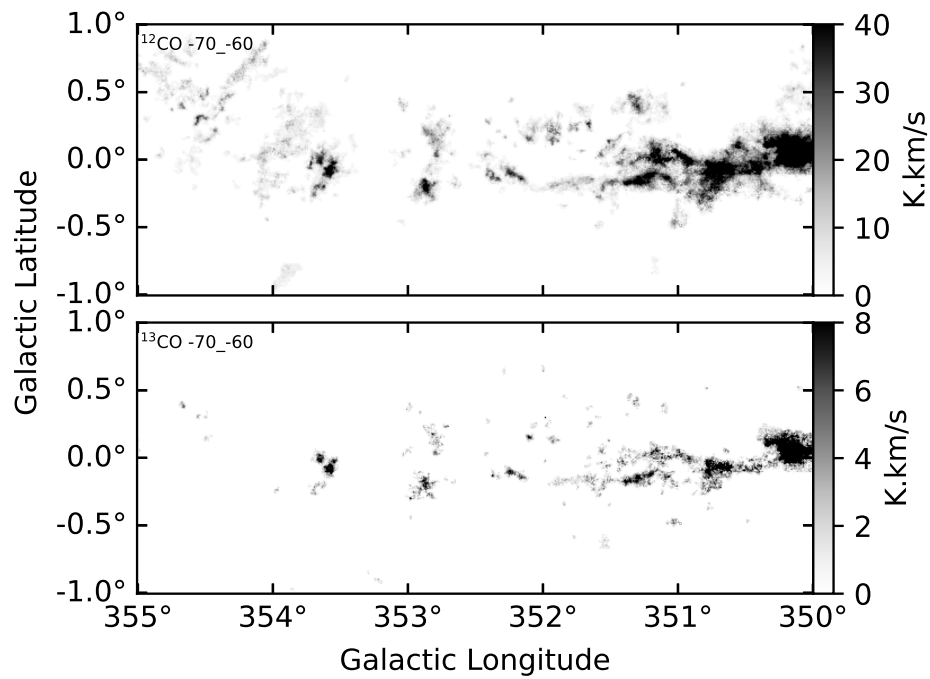

**Figure 171.** Moment 0 image for  $l=350-355^\circ$  calculated over the velocity interval  $v=-70$  to  $-60 \text{ km s}^{-1}$  using the main beam intensity,  $T_{MB}$ . The grayscale  $^{12}\text{CO}$  runs from 0 to 40 K.km/s, while the  $^{13}\text{CO}$  from 0 to 8 K.km/s.

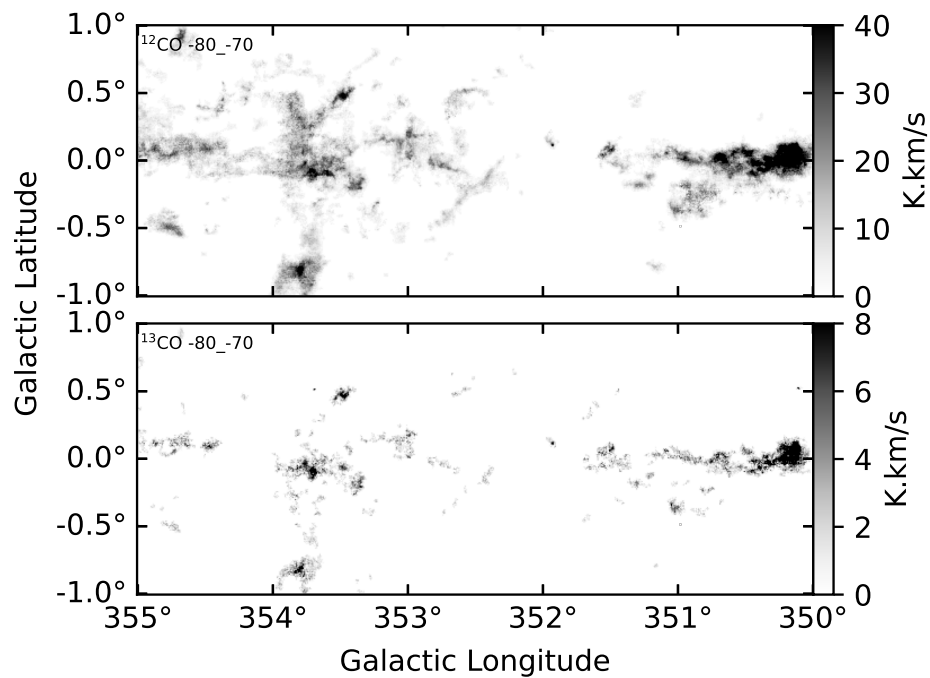

**Figure 172.** Moment 0 image for  $l=350-355^\circ$  calculated over the velocity interval  $v=-80$  to  $-70 \text{ km s}^{-1}$  using the main beam intensity,  $T_{MB}$ . The grayscale  $^{12}\text{CO}$  runs from 0 to 40 K.km/s, while the  $^{13}\text{CO}$  from 0 to 8 K.km/s.

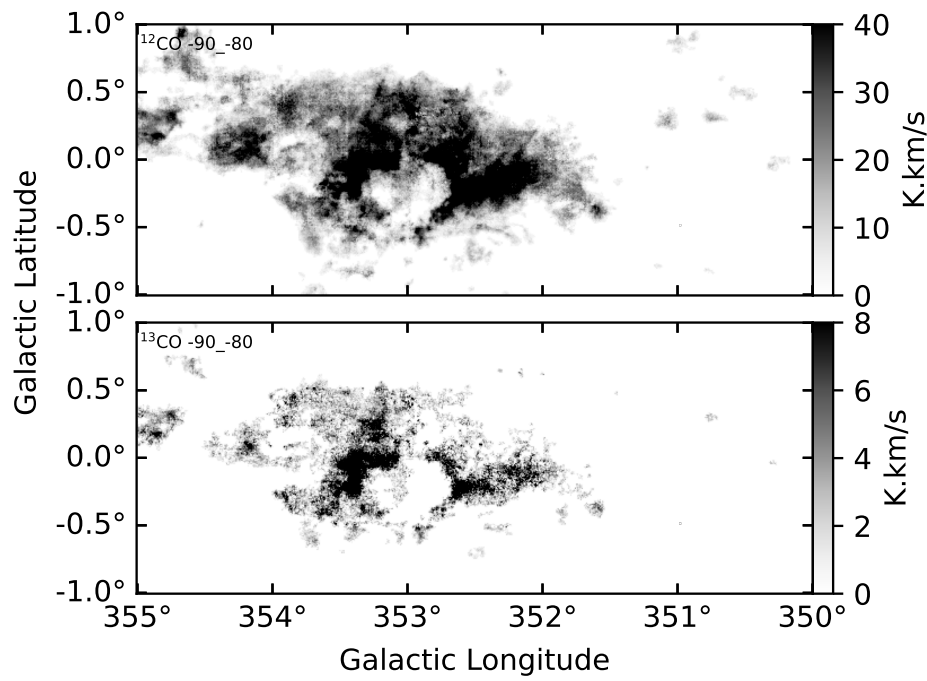

**Figure 173.** Moment 0 image for  $l=350-355^\circ$  calculated over the velocity interval  $v=-90$  to  $-80 \text{ km s}^{-1}$  using the main beam intensity,  $T_{MB}$ . The grayscale  $^{12}\text{CO}$  runs from 0 to 40 K.km/s, while the  $^{13}\text{CO}$  from 0 to 8 K.km/s.

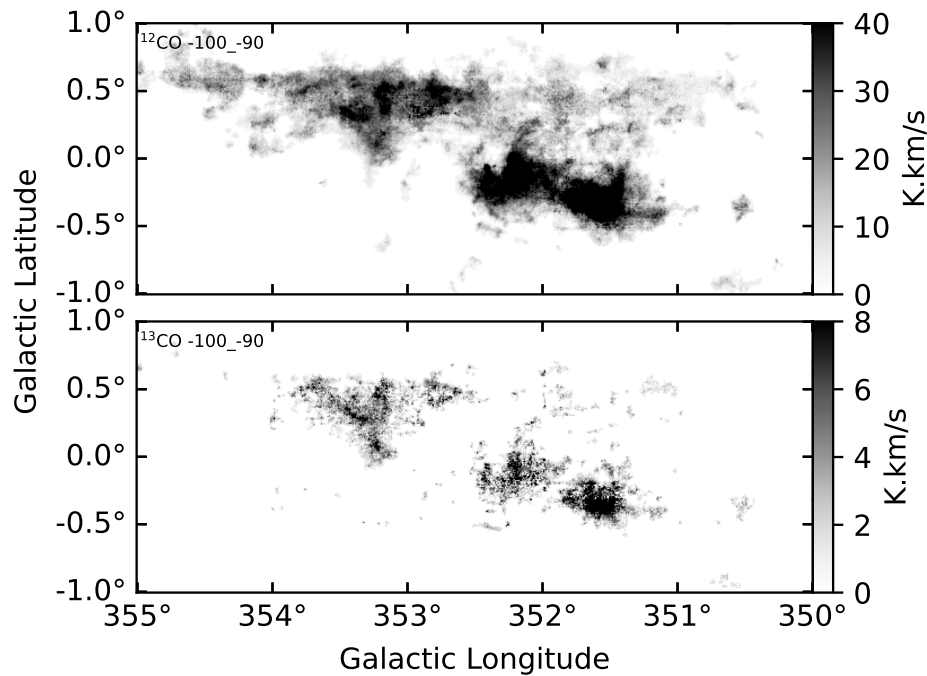

**Figure 174.** Moment 0 image for  $l=350-355^\circ$  calculated over the velocity interval  $v=-100$  to  $-90 \text{ km s}^{-1}$  using the main beam intensity,  $T_{MB}$ . The grayscale  $^{12}\text{CO}$  runs from 0 to 40 K.km/s, while the  $^{13}\text{CO}$  from 0 to 8 K.km/s.

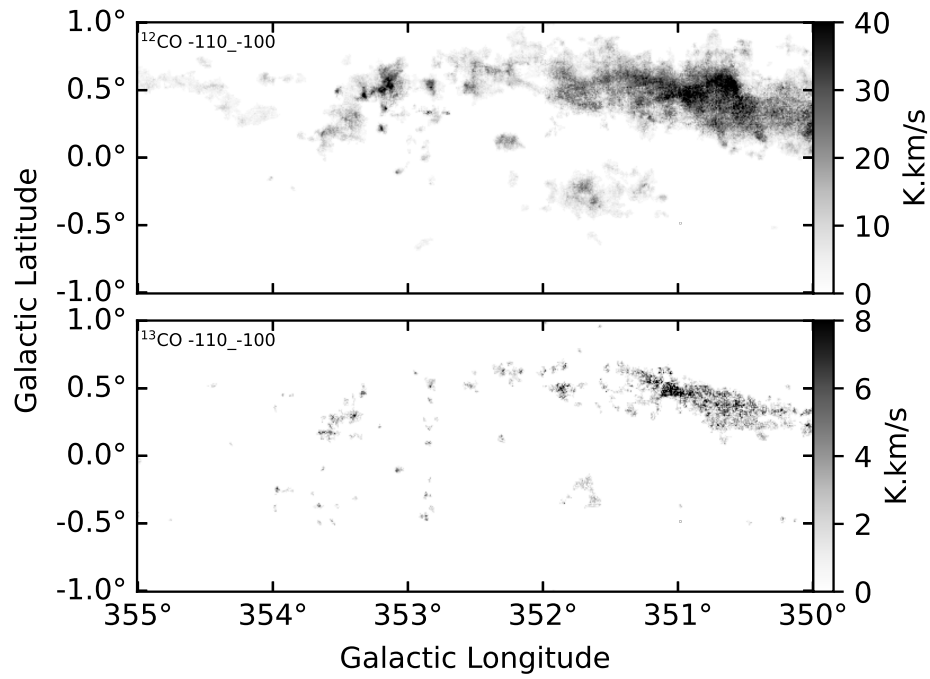

**Figure 175.** Moment 0 image for  $l=350-355^\circ$  calculated over the velocity interval  $v=-110$  to  $-100 \text{ km s}^{-1}$  using the main beam intensity,  $T_{MB}$ . The grayscale  $^{12}\text{CO}$  runs from 0 to 40 K.km/s, while the  $^{13}\text{CO}$  from 0 to 8 K.km/s.

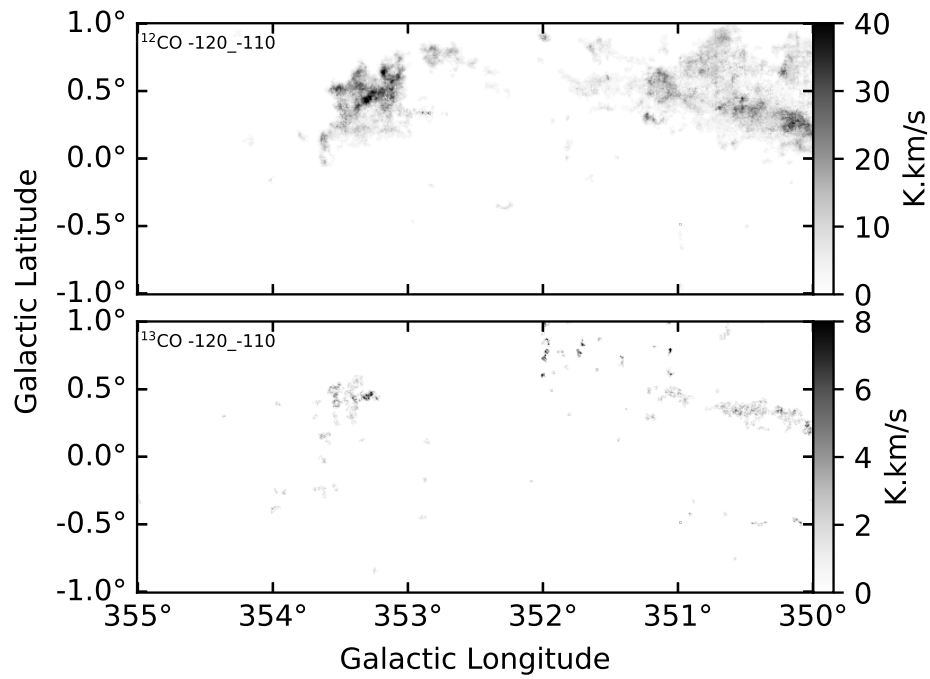

**Figure 176.** Moment 0 image for  $l=350-355^\circ$  calculated over the velocity interval  $v=-120$  to  $-110 \text{ km s}^{-1}$  using the main beam intensity,  $T_{MB}$ . The grayscale  $^{12}\text{CO}$  runs from 0 to 40 K.km/s, while the  $^{13}\text{CO}$  from 0 to 8 K.km/s.

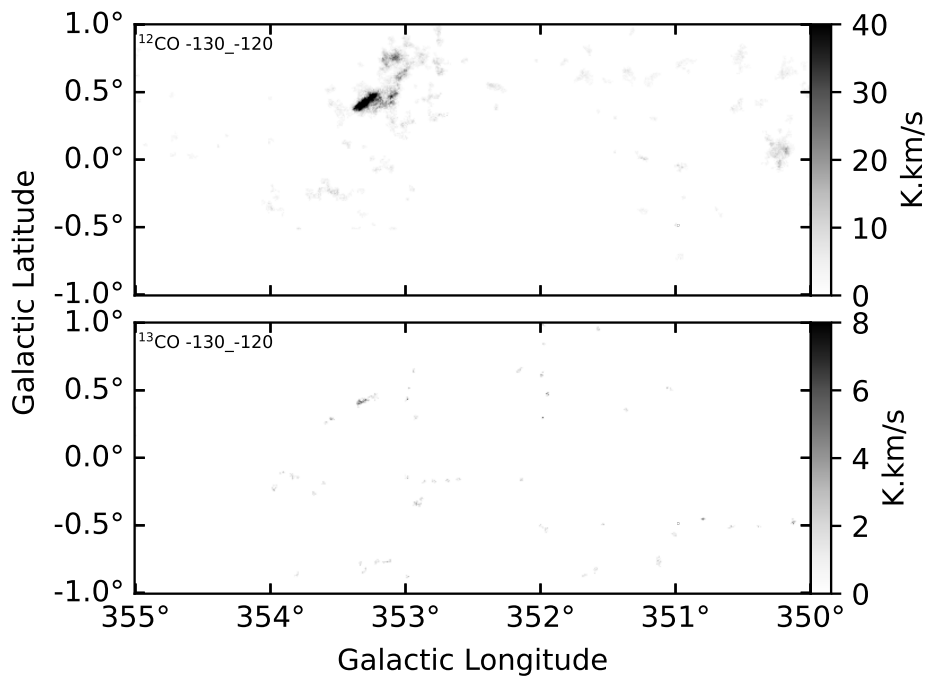

**Figure 177.** Moment 0 image for  $l=350-355^\circ$  calculated over the velocity interval  $v=-130$  to  $-120$  km  $s^{-1}$  using the main beam intensity,  $T_{MB}$ . The grayscale  $^{12}\text{CO}$  runs from 0 to 40 K.km/s, while the  $^{13}\text{CO}$  from 0 to 8 K.km/s.

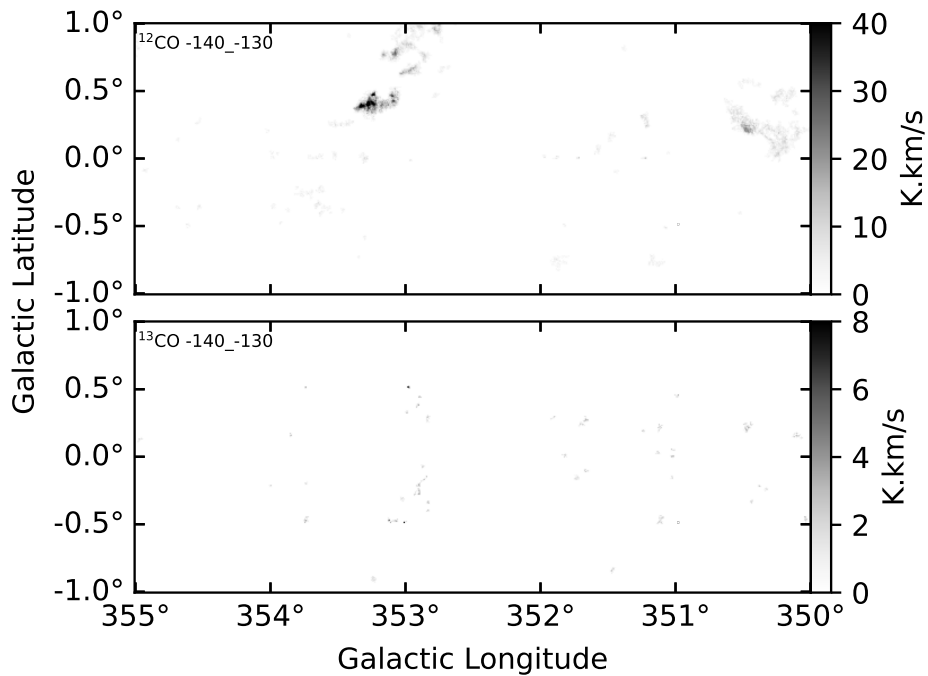

**Figure 178.** Moment 0 image for  $l=350-355^\circ$  calculated over the velocity interval  $v=-140$  to  $-130$  km  $s^{-1}$  using the main beam intensity,  $T_{MB}$ . The grayscale  $^{12}\text{CO}$  runs from 0 to 40 K.km/s, while the  $^{13}\text{CO}$  from 0 to 8 K.km/s.

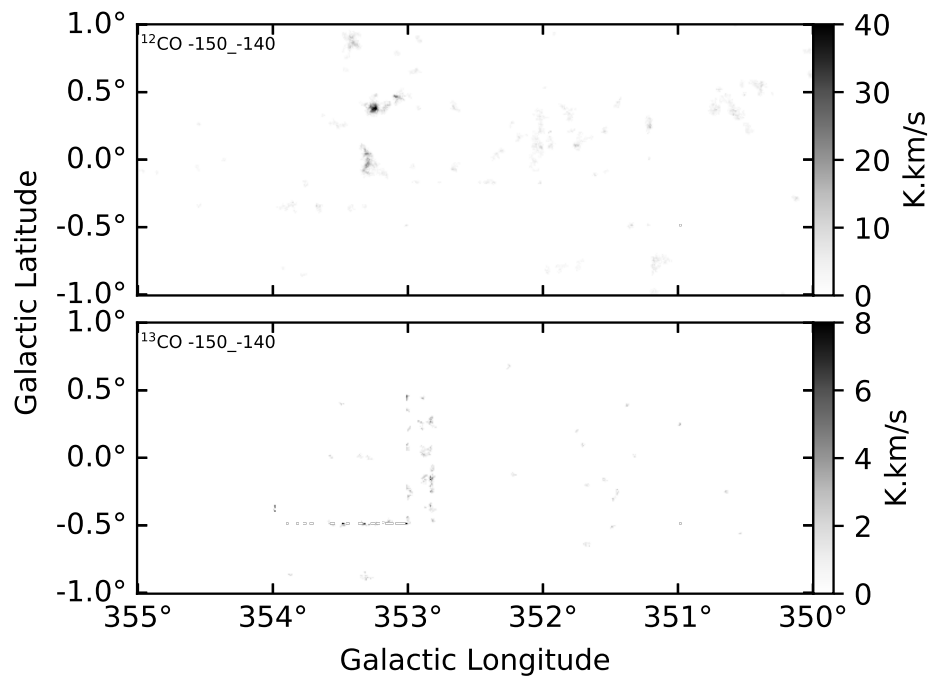

**Figure 179.** Moment 0 image for  $l=350\text{-}355^\circ$  calculated over the velocity interval  $v=-150$  to  $-140\text{ km s}^{-1}$  using the main beam intensity,  $T_{MB}$ . The grayscale  $^{12}\text{CO}$  runs from 0 to 40  $\text{K.km/s}$ , while the  $^{13}\text{CO}$  from 0 to 8  $\text{K.km/s}$ .

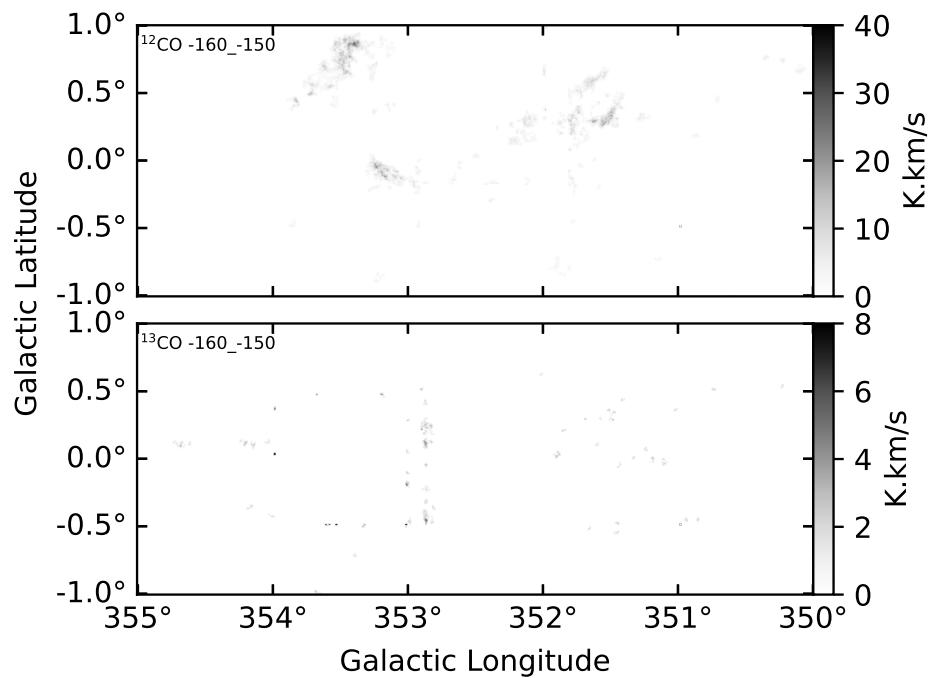

**Figure 180.** Moment 0 image for  $l=350\text{-}355^\circ$  calculated over the velocity interval  $v=-160$  to  $-150\text{ km s}^{-1}$  using the main beam intensity,  $T_{MB}$ . The grayscale  $^{12}\text{CO}$  runs from 0 to 40  $\text{K.km/s}$ , while the  $^{13}\text{CO}$  from 0 to 8  $\text{K.km/s}$ .



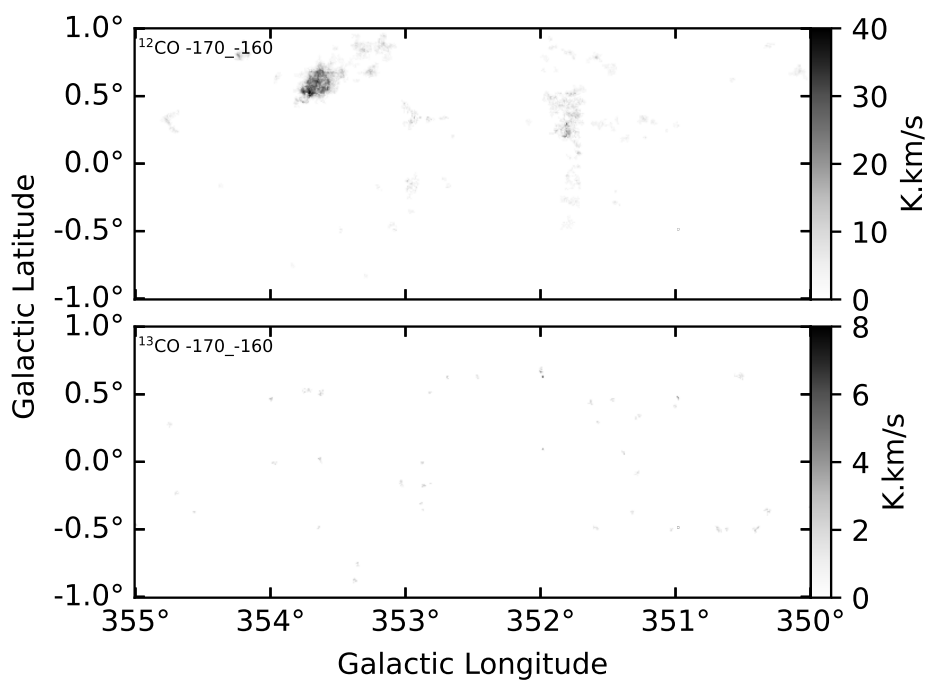

**Figure 181.** Moment 0 image for  $l=350-355^\circ$  calculated over the velocity interval  $v=-170$  to  $-160 \text{ km s}^{-1}$  using the main beam intensity,  $T_{MB}$ . The grayscale  $^{12}\text{CO}$  runs from 0 to 40  $\text{K.km/s}$ , while the  $^{13}\text{CO}$  from 0 to 8  $\text{K.km/s}$ .

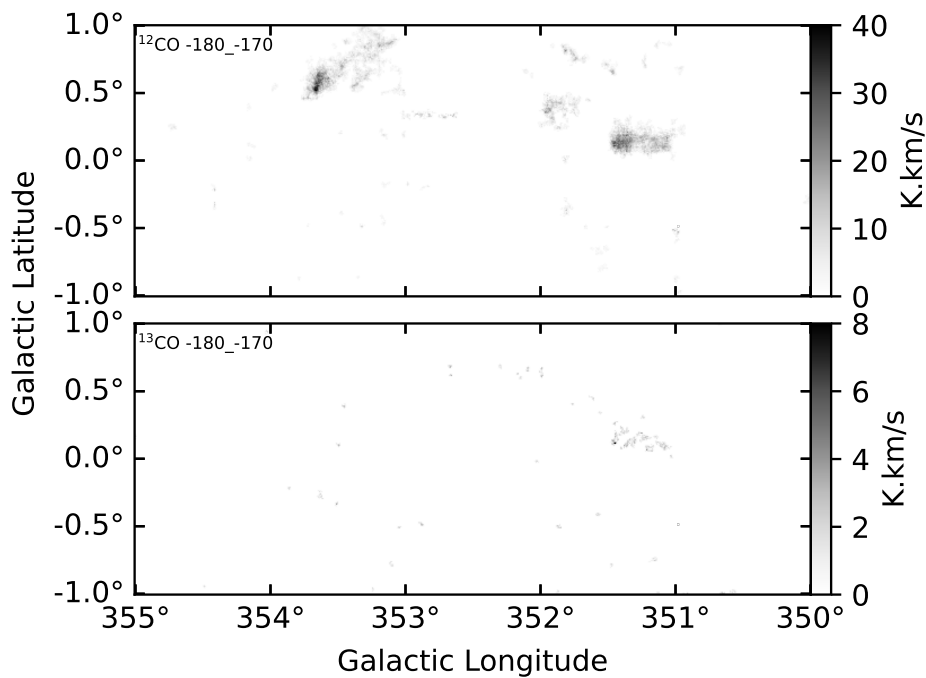

**Figure 182.** Moment 0 image for  $l=350-355^\circ$  calculated over the velocity interval  $v=-180$  to  $-170 \text{ km s}^{-1}$  using the main beam intensity,  $T_{MB}$ . The grayscale  $^{12}\text{CO}$  runs from 0 to 40  $\text{K.km/s}$ , while the  $^{13}\text{CO}$  from 0 to 8  $\text{K.km/s}$ .

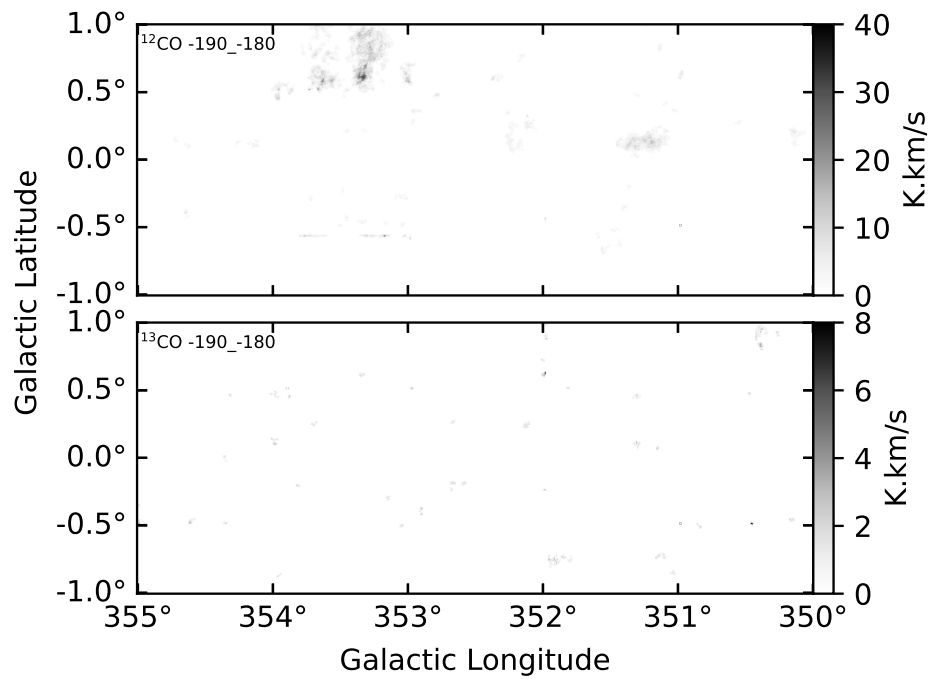

**Figure 183.** Moment 0 image for  $l=350-355^\circ$  calculated over the velocity interval  $v=-190$  to  $-180 \text{ km s}^{-1}$  using the main beam intensity,  $T_{MB}$ . The grayscale  $^{12}\text{CO}$  runs from 0 to 40 K.km/s, while the  $^{13}\text{CO}$  from 0 to 8 K.km/s.

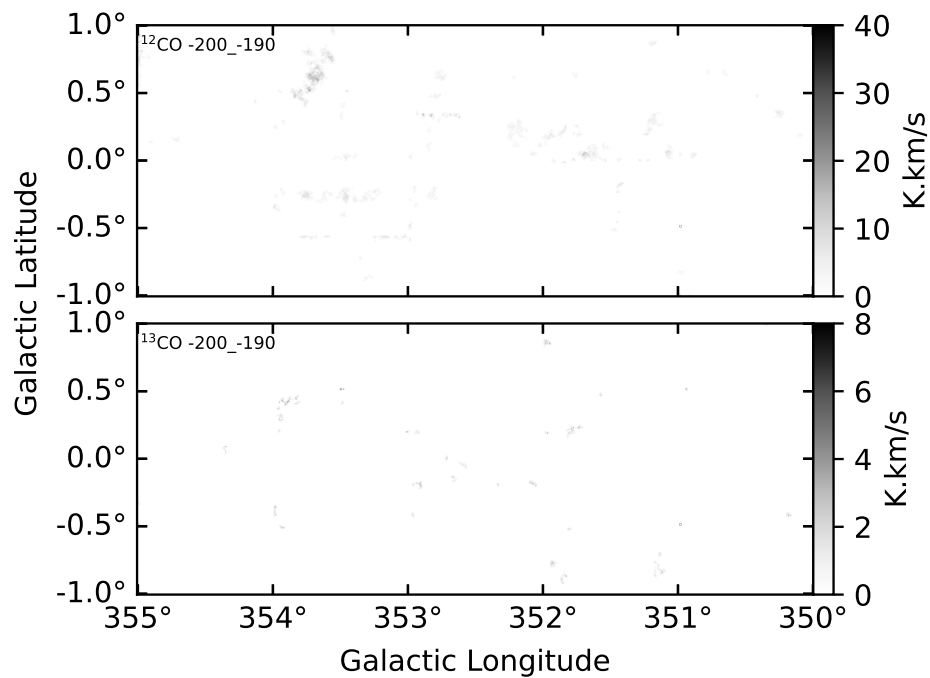

**Figure 184.** Moment 0 image for  $l=350-355^\circ$  calculated over the velocity interval  $v=-200$  to  $-190 \text{ km s}^{-1}$  using the main beam intensity,  $T_{MB}$ . The grayscale  $^{12}\text{CO}$  runs from 0 to 40 K.km/s, while the  $^{13}\text{CO}$  from 0 to 8 K.km/s.

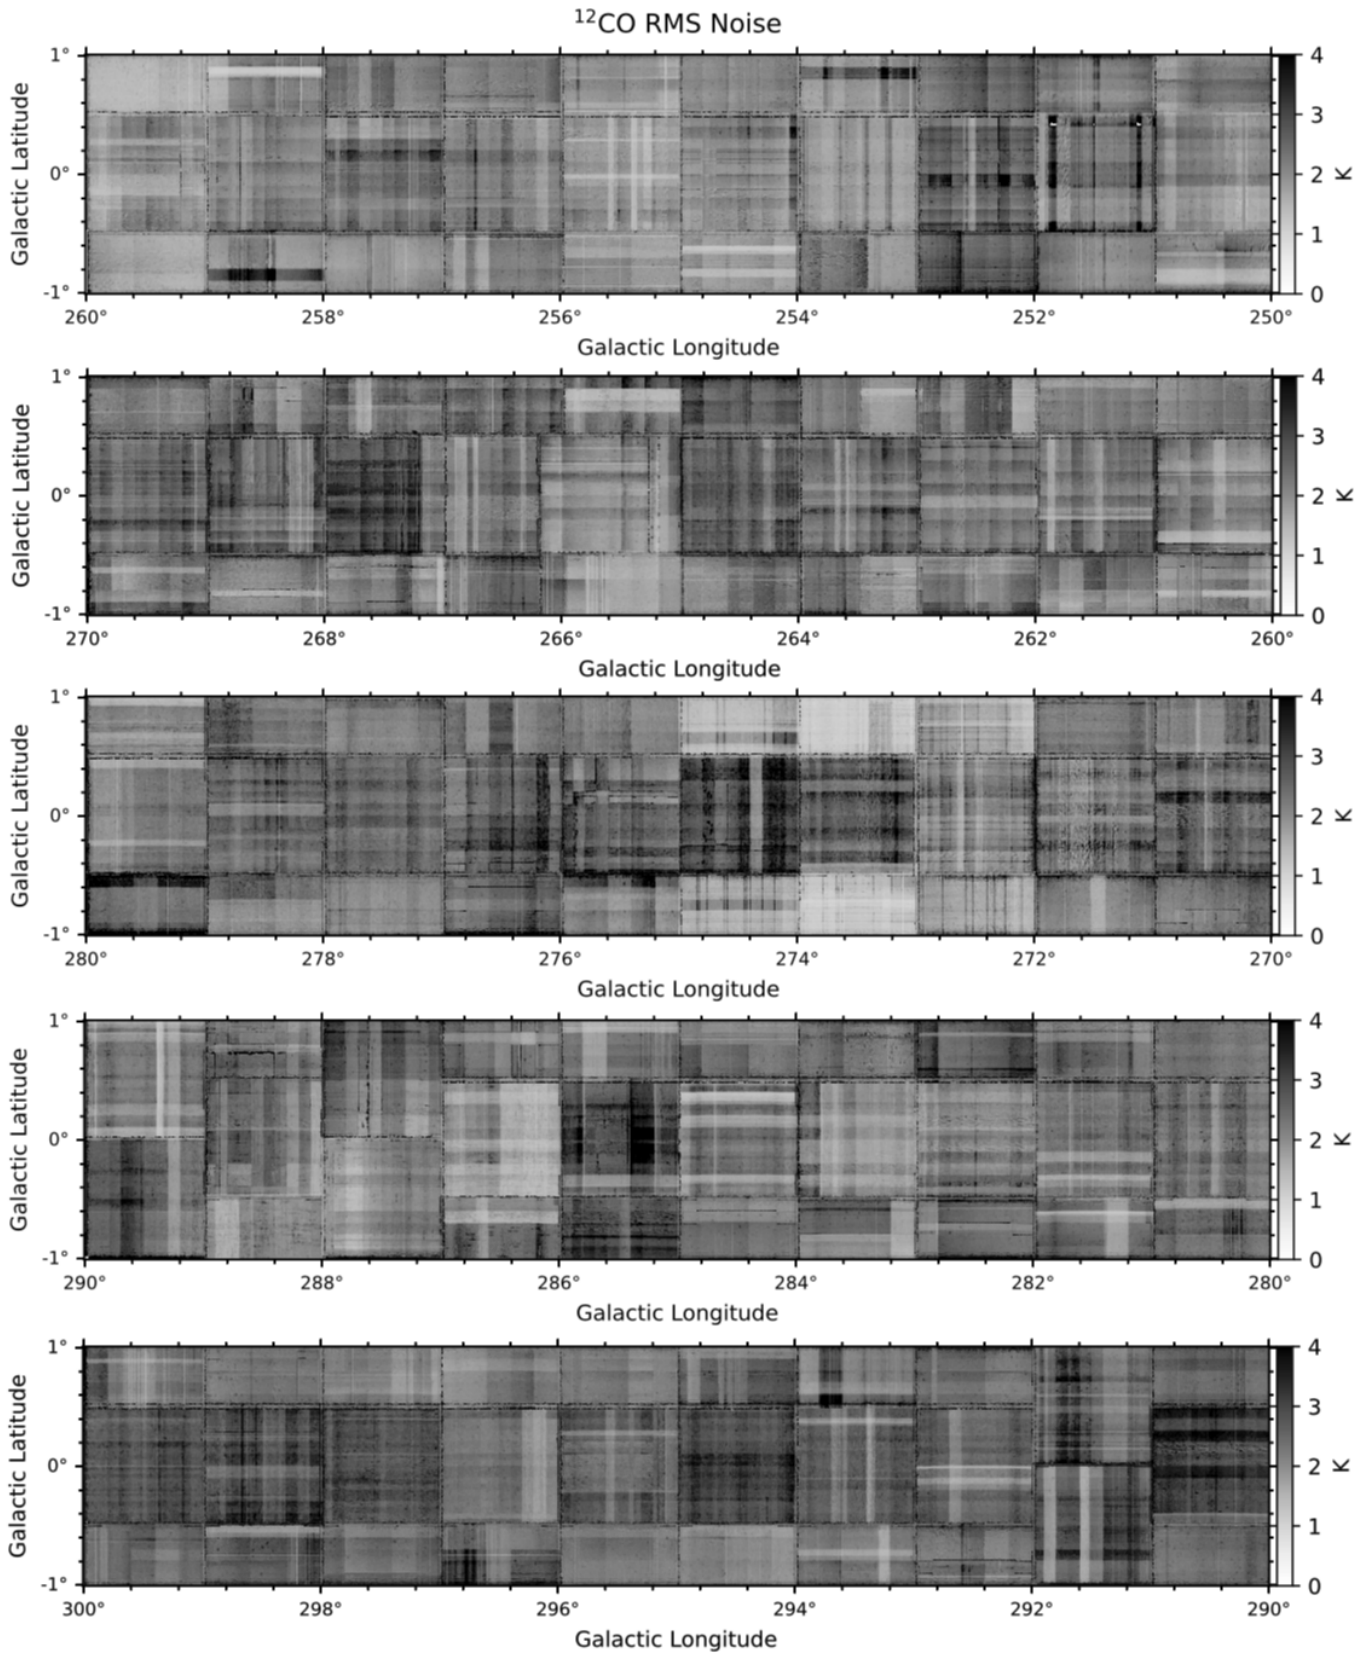

**Figure 185.**  $1\sigma$  noise images for the  $^{12}\text{CO}$  data covering 100 square degrees from  $l = 250\text{--}300^\circ$  and  $b = \pm 1^\circ$  in units of  $T_{\text{MB}}$  (K). The striping pattern is inherent to the data set, resulting from scanning in the  $l$  and  $b$  directions in variable observing conditions.

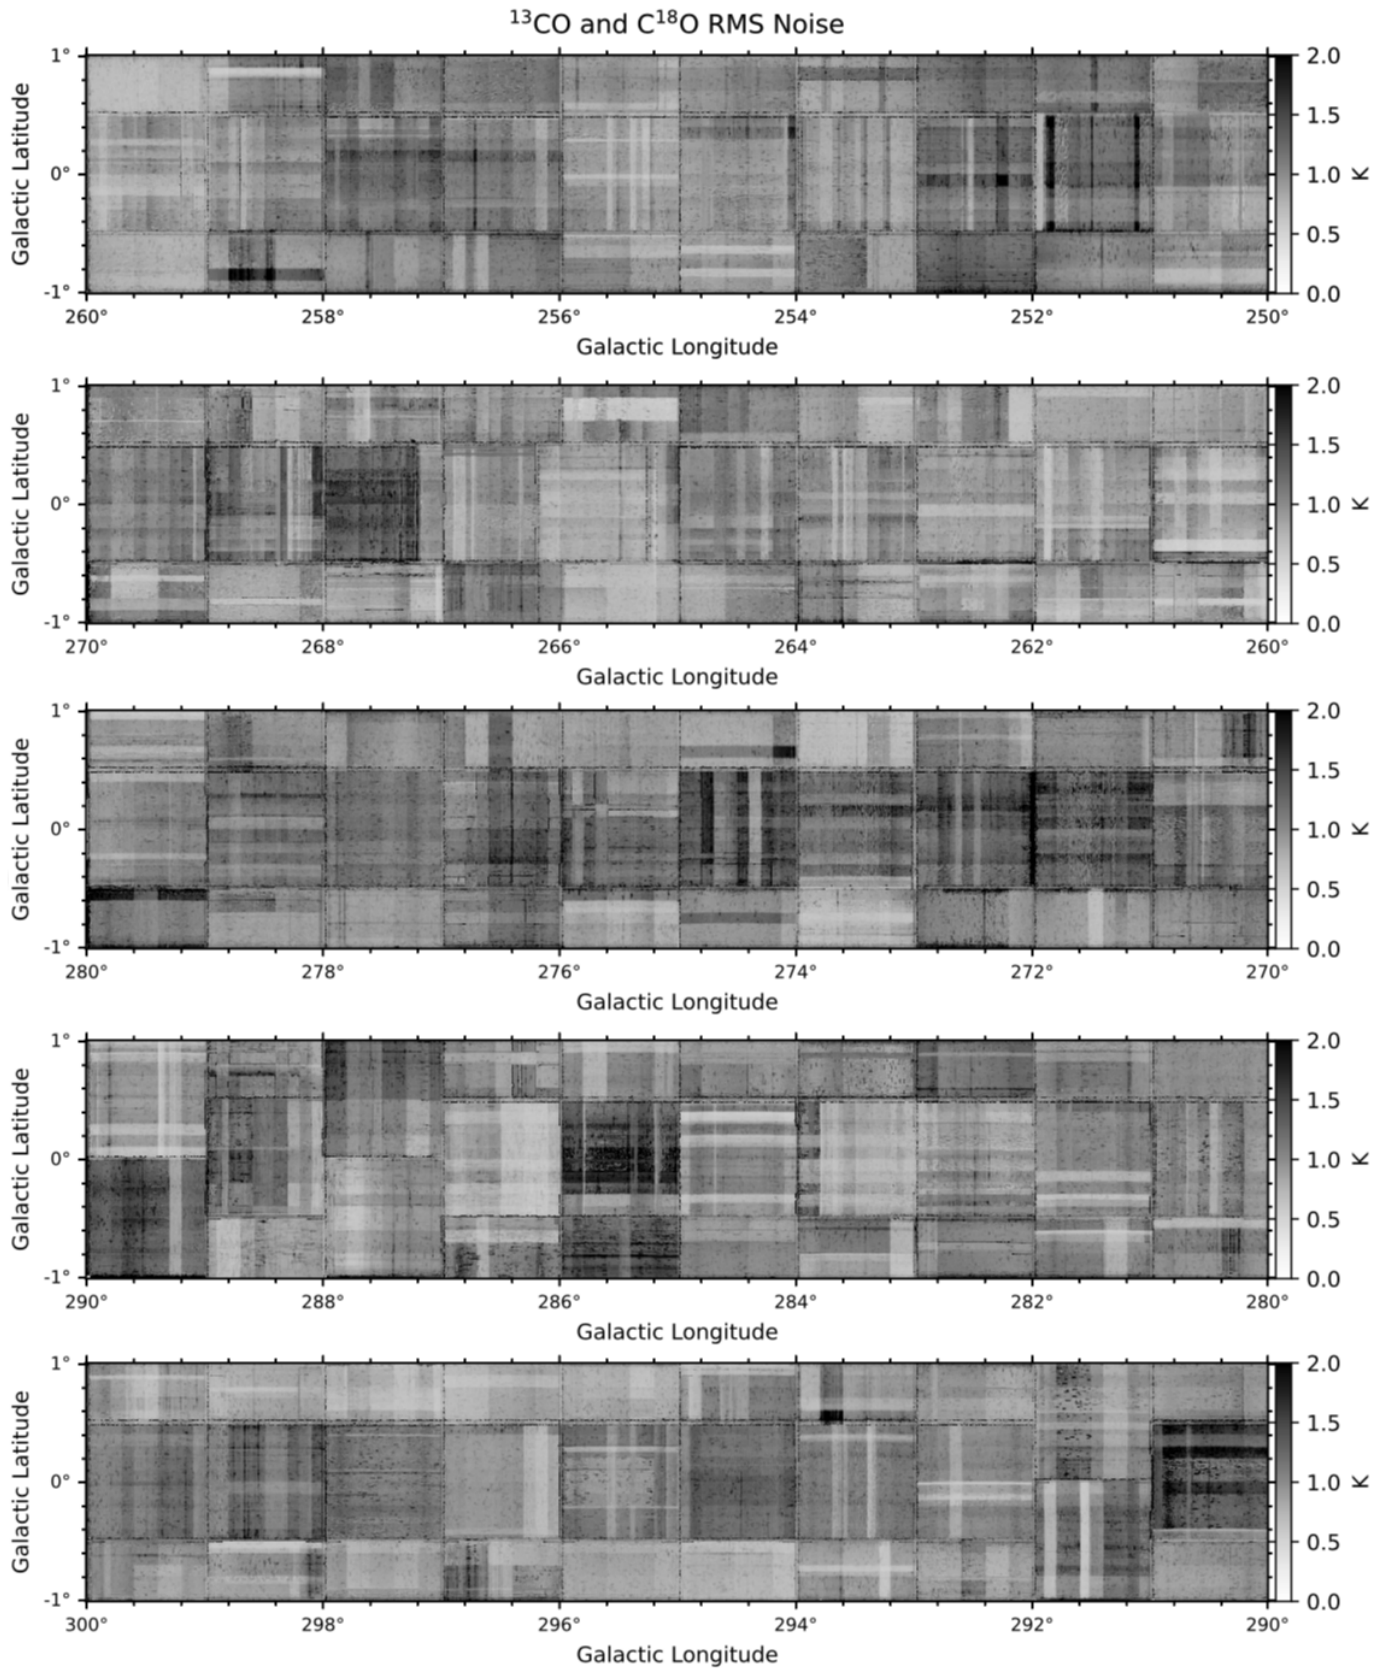

Figure 186. As in Figure 185, these are the  $1\sigma$  noise images for the  $^{13}\text{CO}$  and  $\text{C}^{18}\text{O}$  data covering the same 100 square degrees.

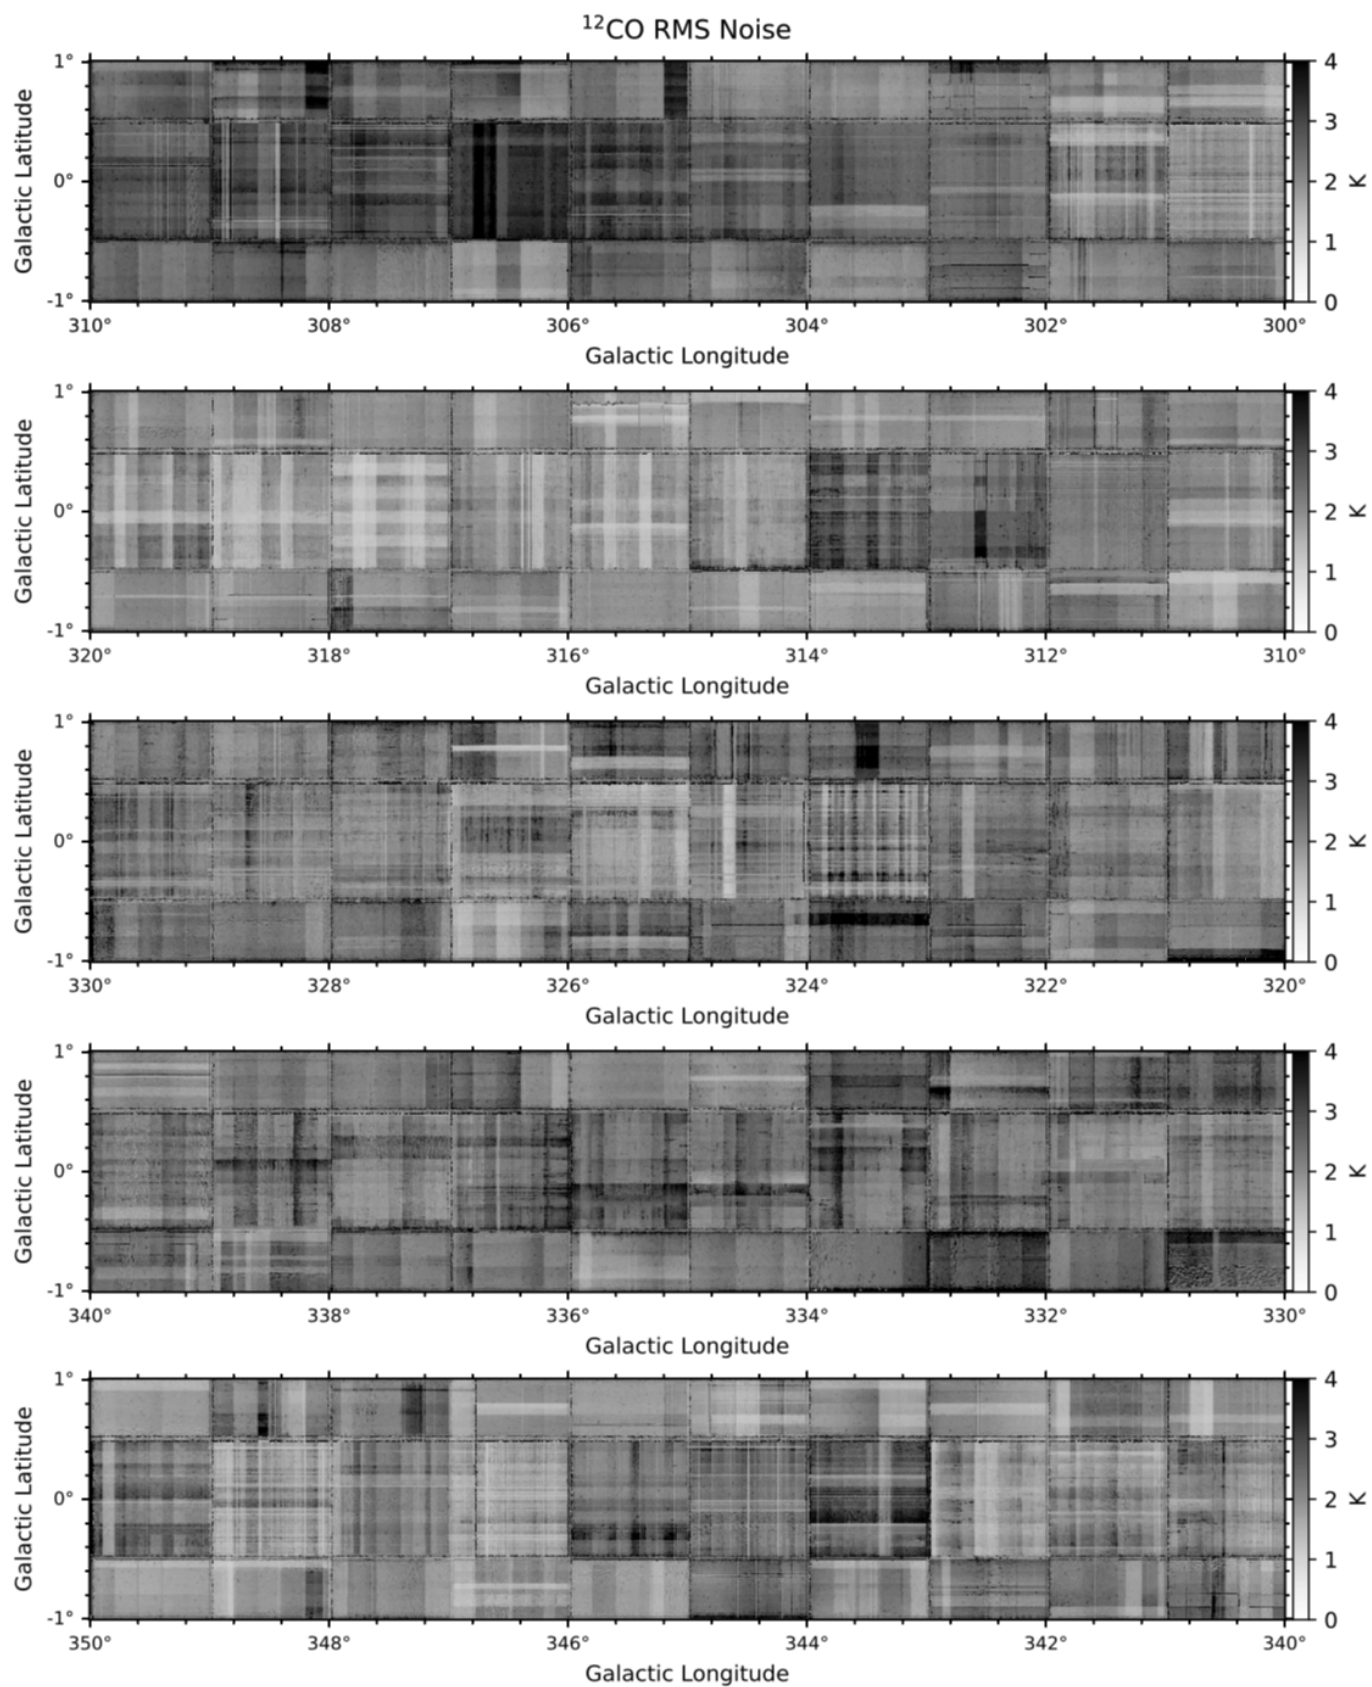

**Figure 187.**  $1\sigma$  noise images for the  $^{12}\text{CO}$  data covering 100 square degrees from  $l = 300\text{--}350^\circ$  and  $b = \pm 1^\circ$  in units of  $T_{MB}$  (K). The striping pattern is inherent to the data set, resulting from scanning in the  $l$  and  $b$  directions in variable observing conditions.

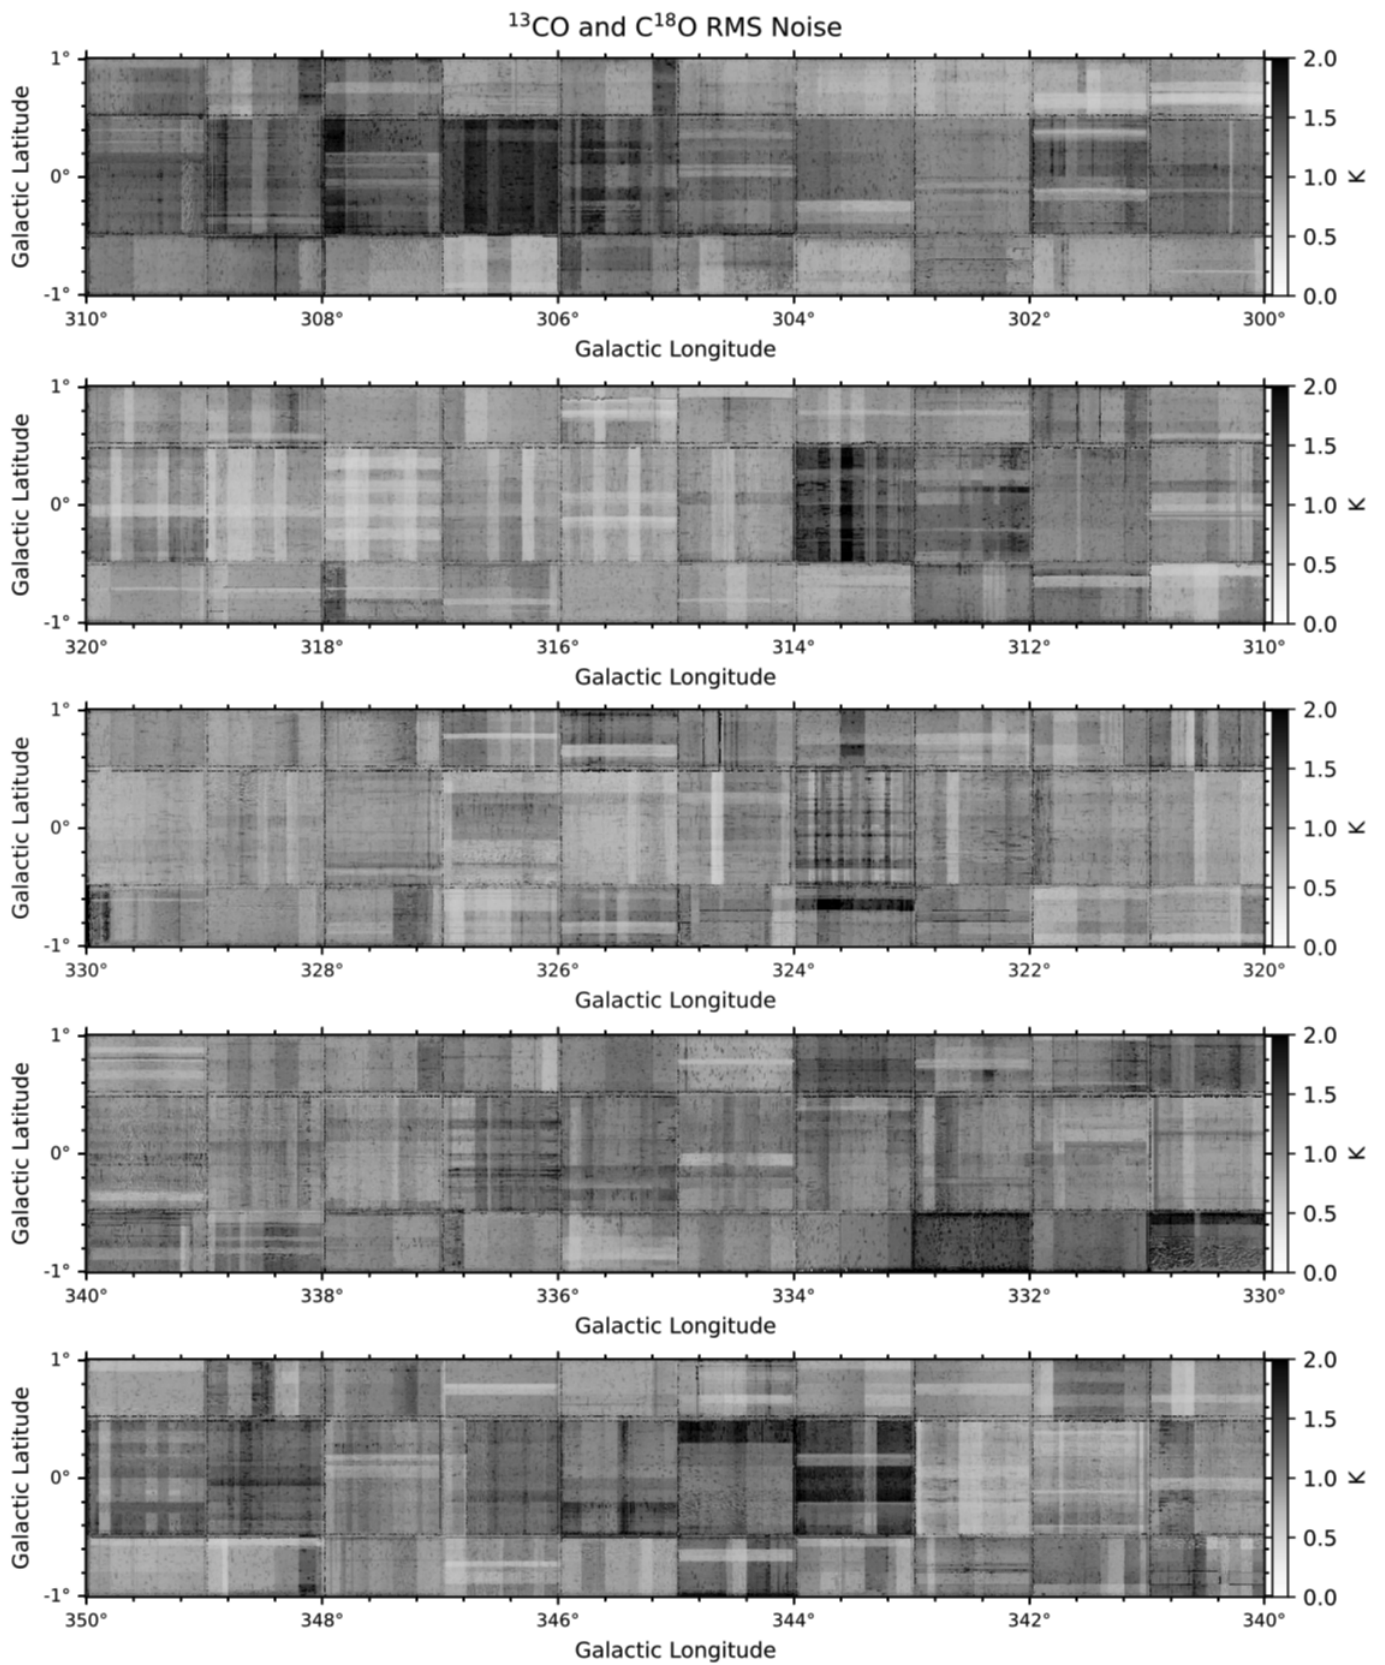

Figure 188. As in Figure 187, these are the  $1\sigma$  noise images for the  $^{13}\text{CO}$  and  $\text{C}^{18}\text{O}$  data covering the same 100 square degrees.

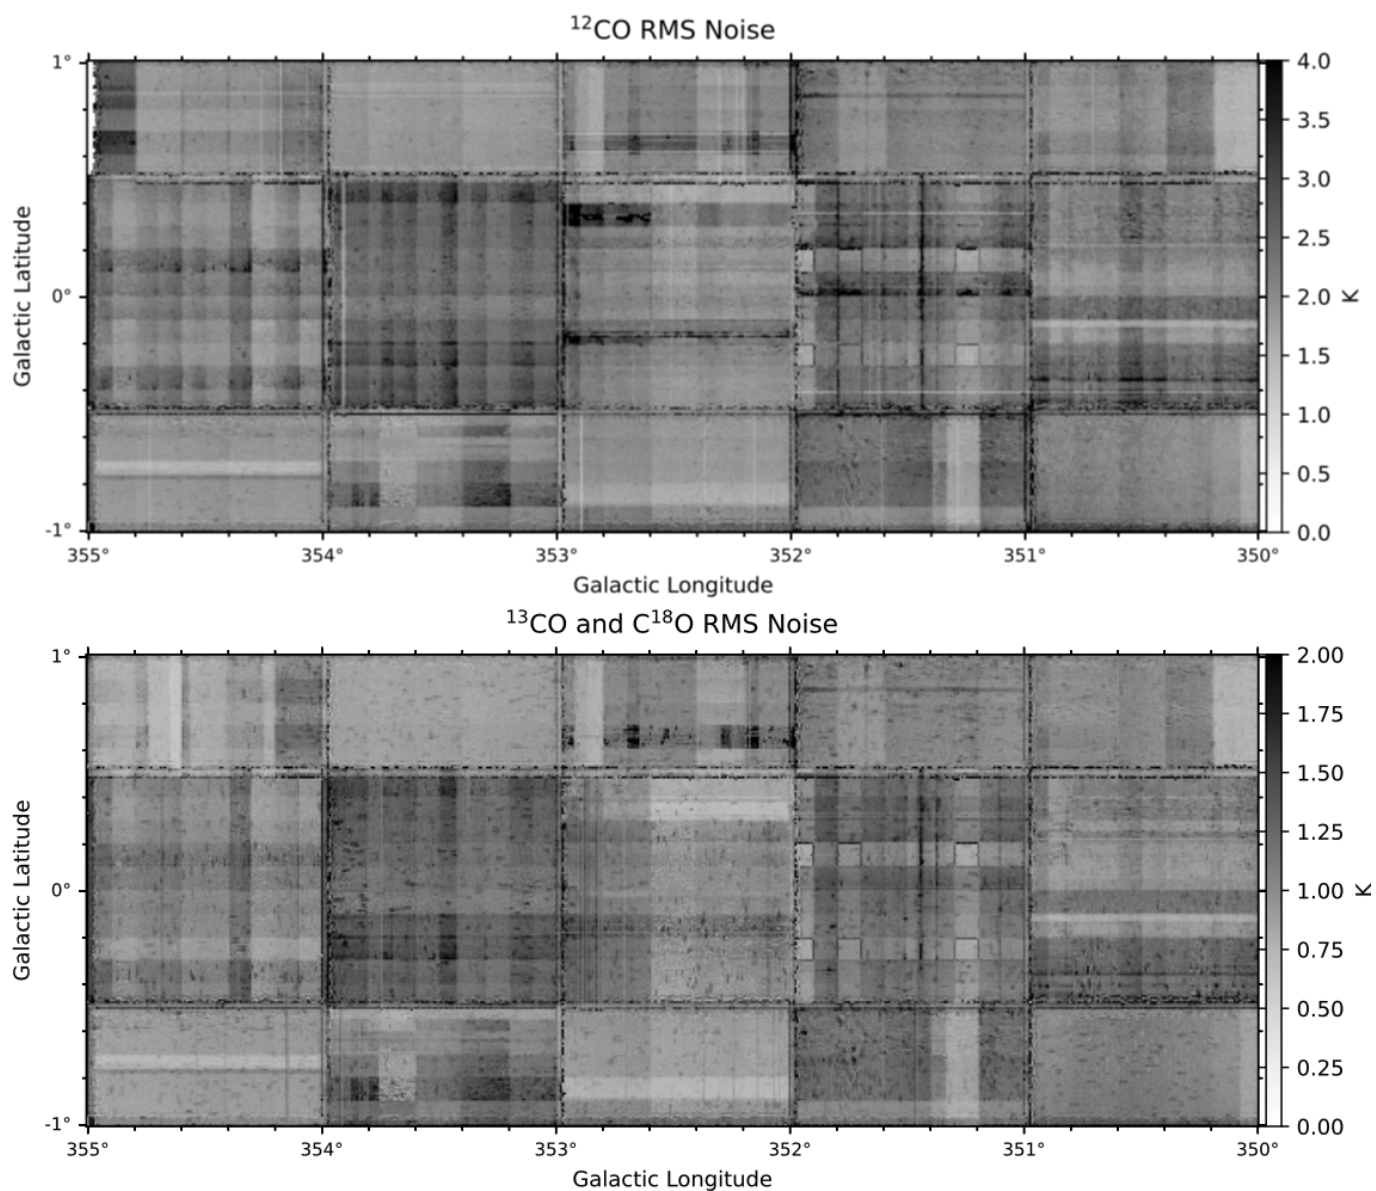

**Figure 189.**  $1\sigma$  noise images for the  $^{12}\text{CO}$  (top panel),  $^{13}\text{CO}$ , and  $\text{C}^{18}\text{O}$  (bottom panel) data covering 10 square degrees from  $l = 350\text{--}355^\circ$  and  $b = \pm 1^\circ$  in units of  $T_{\text{MB}}$  (K). The striping pattern is inherent to the data set, resulting from scanning in the  $l$  and  $b$  directions in variable observing conditions.

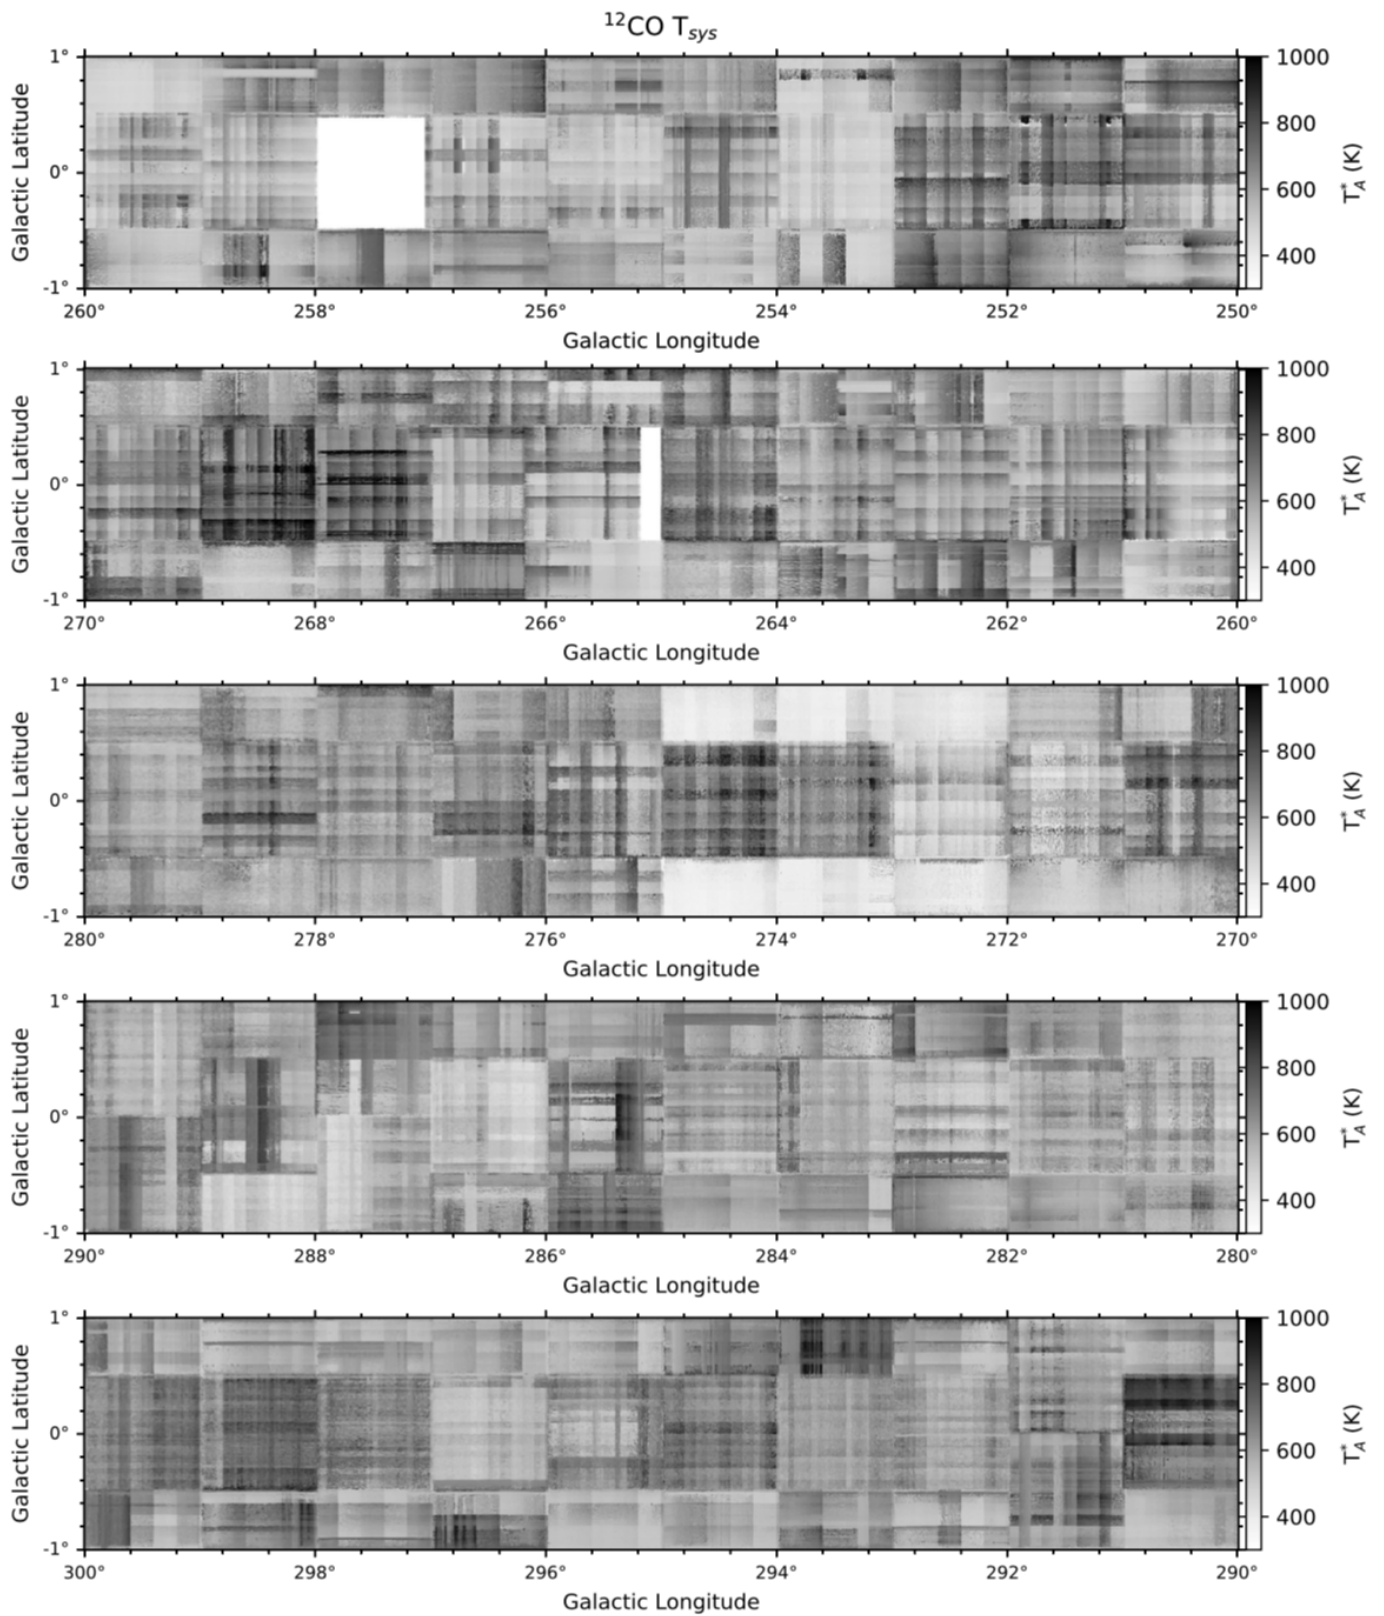

**Figure 190.**  $T_{\text{sys}}$  images for the  $^{12}\text{CO}$  data covering the 100 square degrees from  $l = 250\text{--}300^\circ$  in units of  $T_A^*$  (K) (as indicated by the scale bars). The striping pattern is inherent to the data set, resulting from scanning in the  $l$  and  $b$  directions in variable observing conditions. The blank regions are accidentally deleted data.



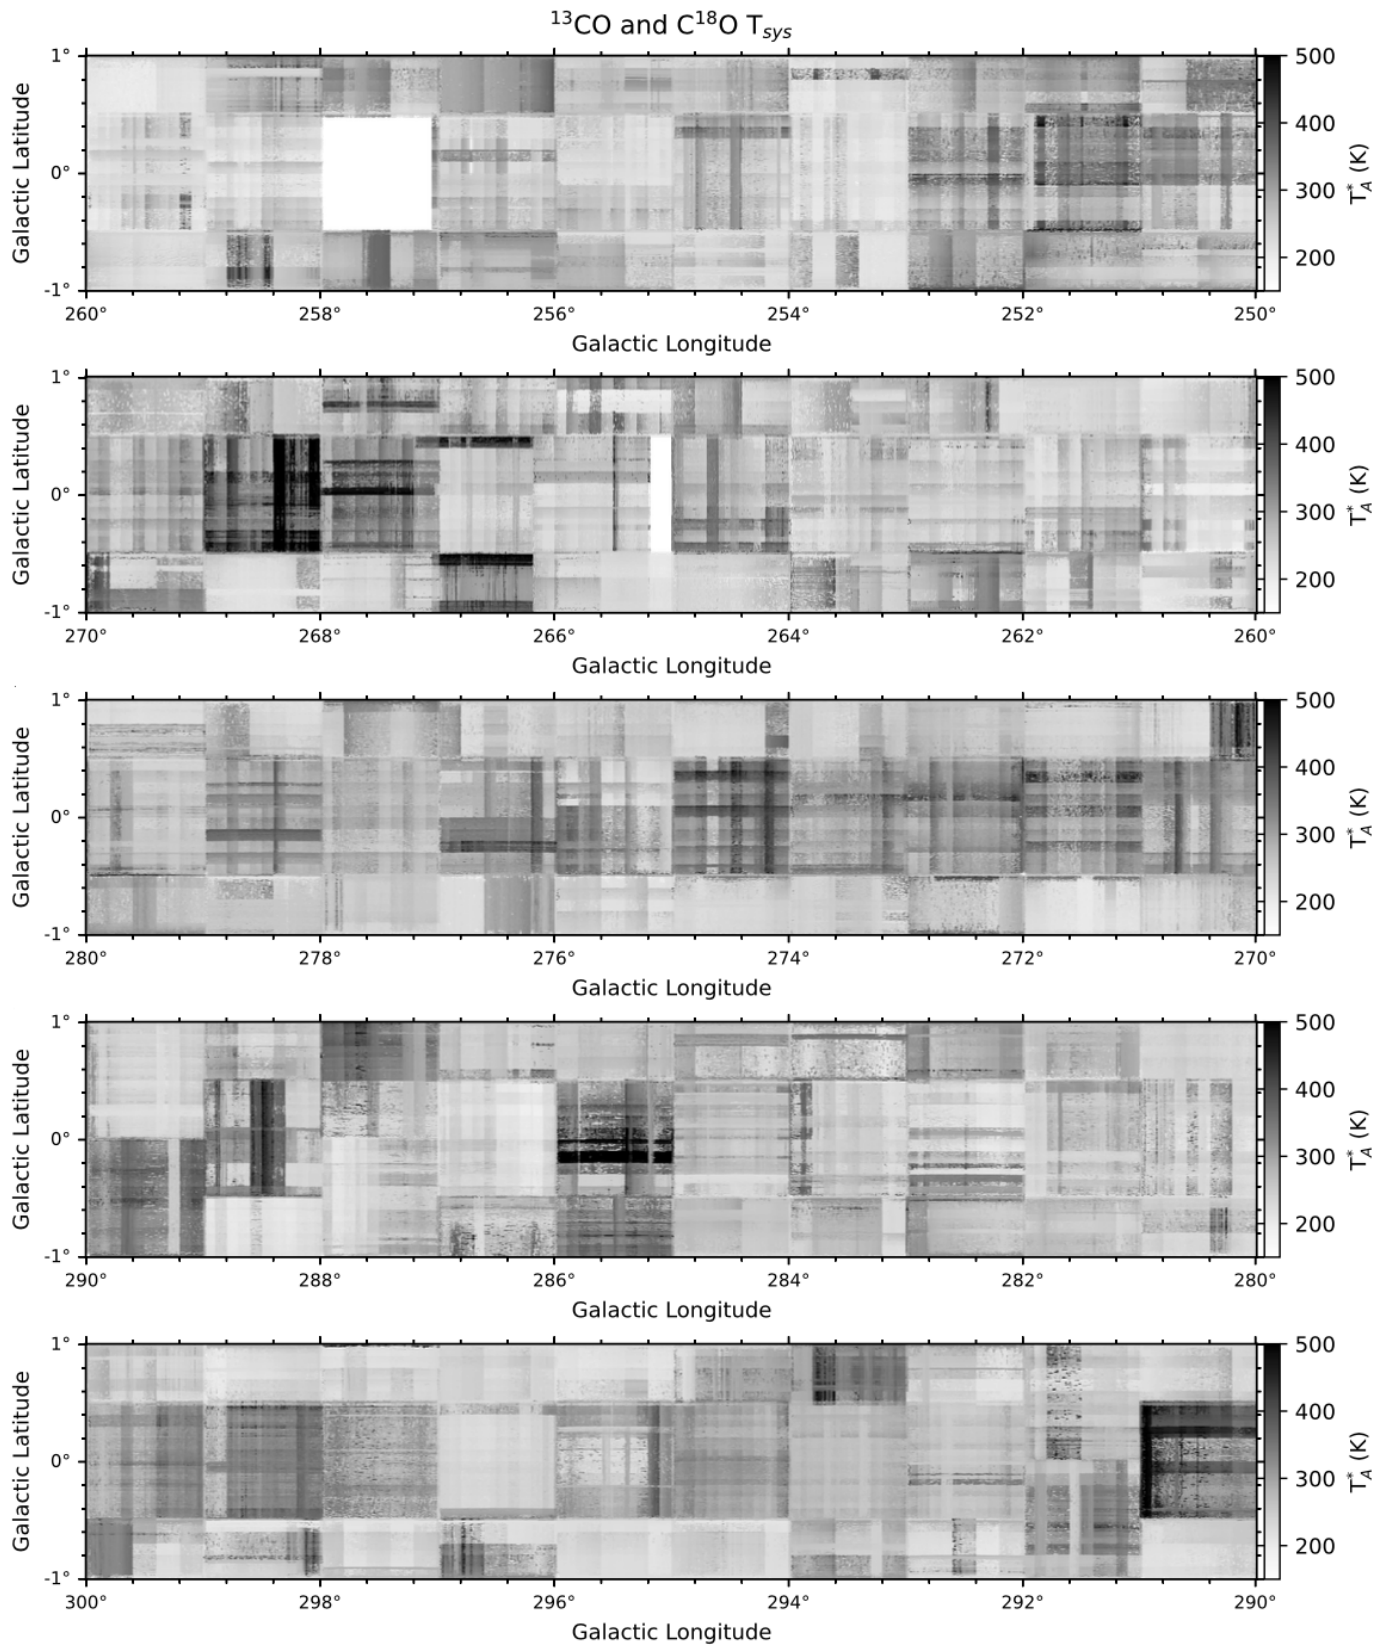

**Figure 191.**  $T_{\text{sys}}$  images for the  $^{13}\text{CO}$  and  $\text{C}^{18}\text{O}$  data covering the 100 square degrees from  $l = 250\text{--}300^\circ$  in units of  $T_A^*$  (K) (as indicated by the scale bars). The striping pattern is inherent to the data set, resulting from scanning in the  $l$  and  $b$  directions in variable observing conditions. The blank regions are accidentally deleted data.

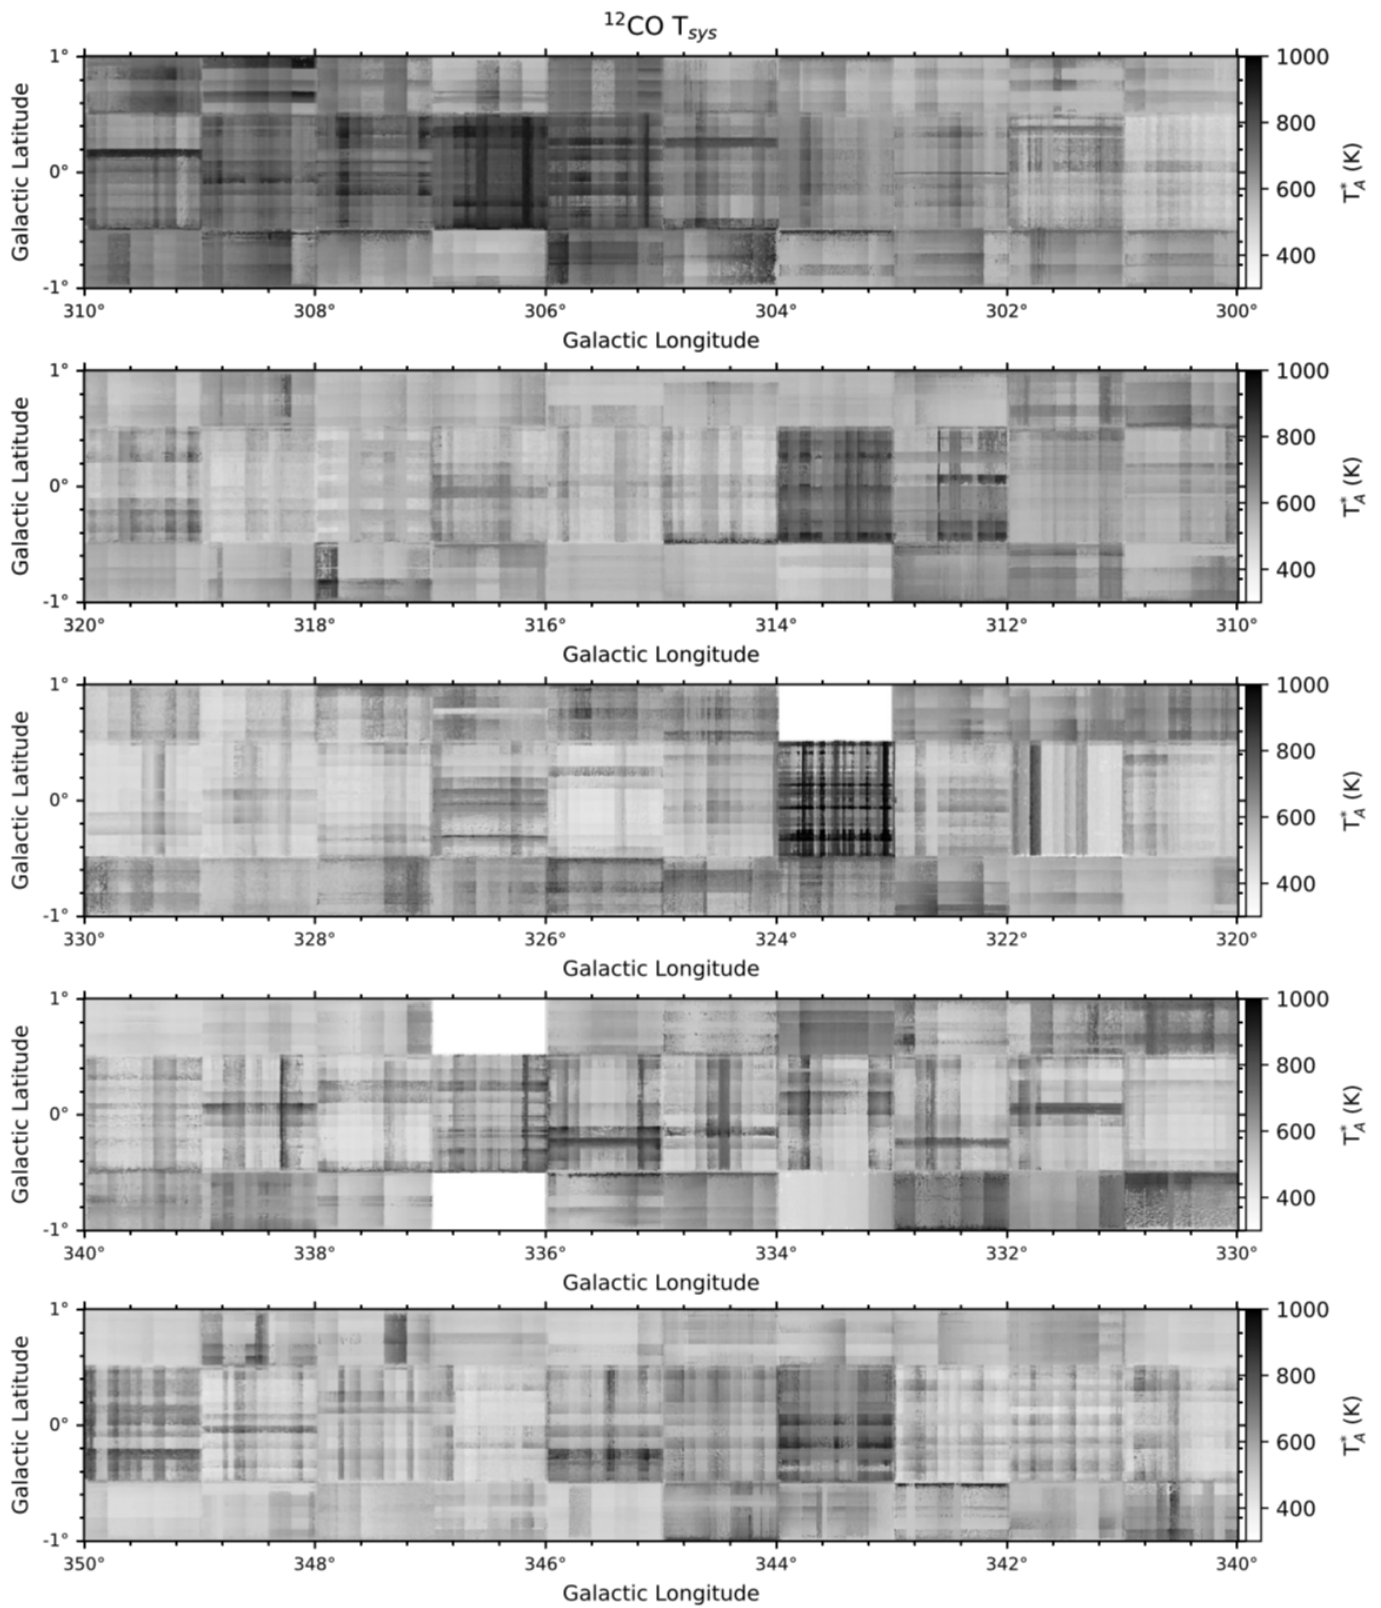

**Figure 192.**  $T_{\text{sys}}$  images for the  $^{12}\text{CO}$  data covering the 100 square degrees from  $l = 300\text{--}350^\circ$  in units of  $T_A^*$  (K) (as indicated by the scale bars). The striping pattern is inherent to the data set, resulting from scanning in the  $l$  and  $b$  directions in variable observing conditions. The blank regions are accidentally deleted data.

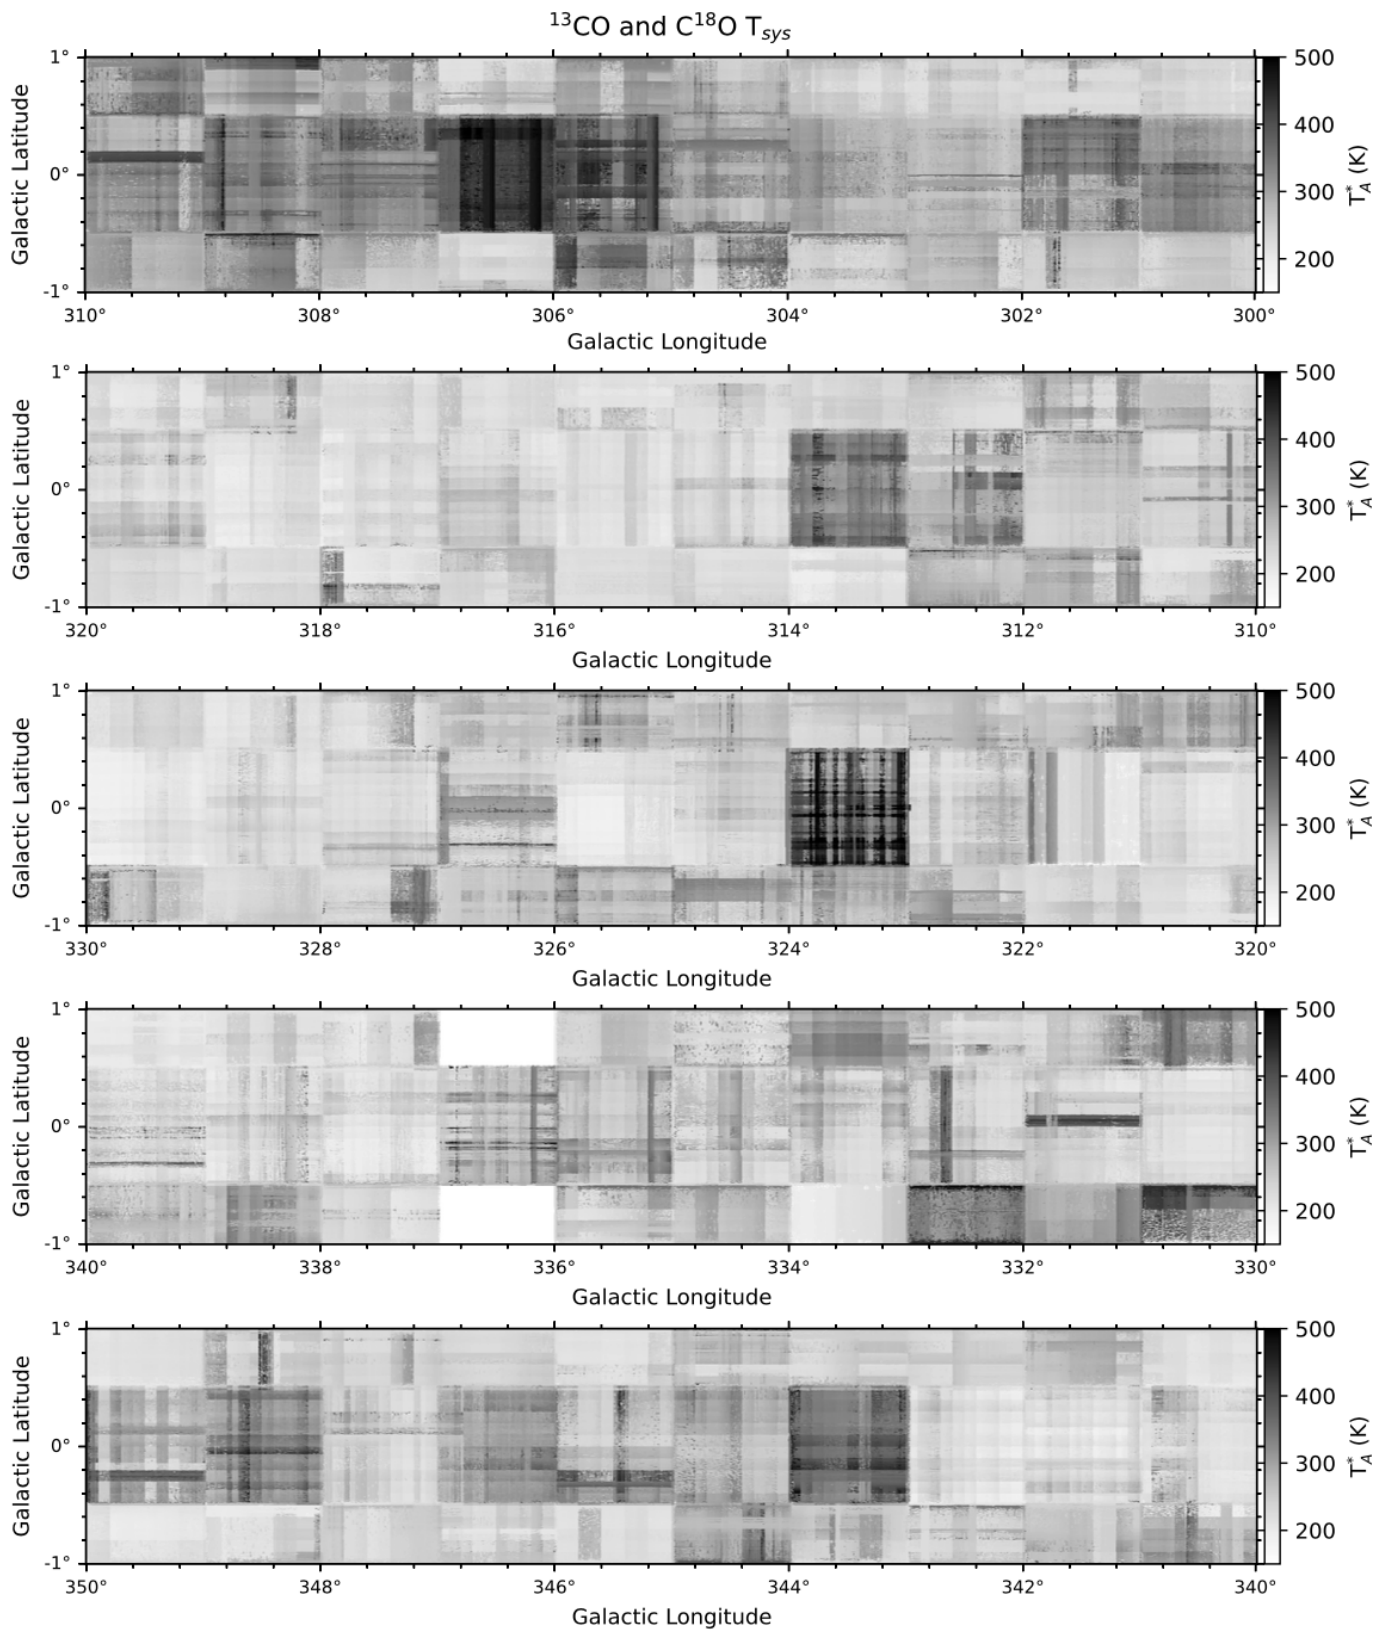

**Figure 193.**  $T_{\text{sys}}$  images for the  $^{13}\text{CO}$  and  $\text{C}^{18}\text{O}$  data covering the 100 square degrees from  $l = 300\text{--}350^\circ$  in units of  $T_A^*$  (K) (as indicated by the scale bars). The striping pattern is inherent to the data set, resulting from scanning in the  $l$  and  $b$  directions in variable observing conditions. The blank regions are accidentally deleted data.

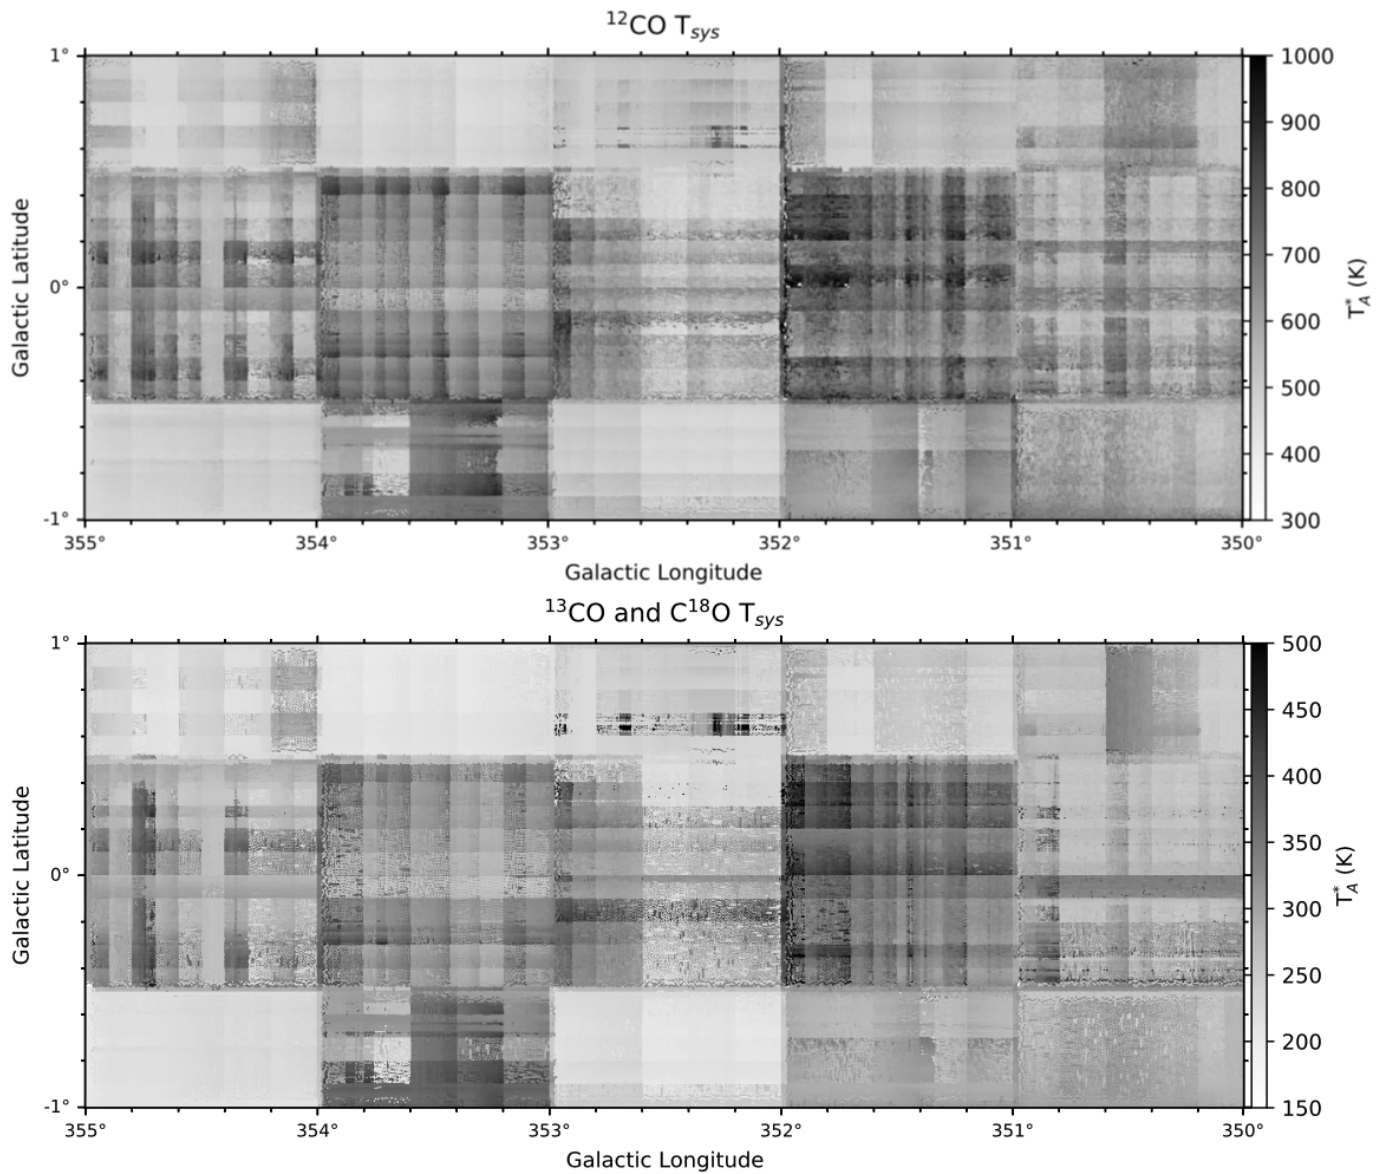

**Figure 194.**  $T_{\text{sys}}$  images for the  $^{12}\text{CO}$  (top panel),  $^{13}\text{CO}$  and  $\text{C}^{18}\text{O}$  (bottom panel) data covering the 10 square degrees from  $l = 350\text{--}355^\circ$  in units of  $T_A^*$  (K) (as indicated by the scale bars). The striping pattern is inherent to the data set, resulting from scanning in the  $l$  and  $b$  directions in variable observing conditions.
